# Supplementary material for: Reactivity of tetrel functionalized heptapnictogen clusters towards heteroallenes
Source: Royal Society of Chemistry journal article supplement (doi:10.1039/d2dt04074c), 2023-01-01
Supplement: d2dt04074c1.pdf [file d2dt04074c1.pdf]

## Supporting information

### Table of Contents

|                                                                                                                                                |     |
|------------------------------------------------------------------------------------------------------------------------------------------------|-----|
| <b>1. Methods and materials</b> .....                                                                                                          | 2   |
| <b>1.1. Experimental Considerations</b> .....                                                                                                  | 2   |
| <b>1.2. Analytical Considerations</b> .....                                                                                                    | 2   |
| <b>1.3. X-ray diffraction Studies</b> .....                                                                                                    | 3   |
| <b>1.4. General computational considerations</b> .....                                                                                         | 3   |
| <b>2. Synthesis and Characterisation Data</b> .....                                                                                            | 4   |
| <b>2.1. Synthesis of <math>[K_3(DME)_x][As_7]</math></b> .....                                                                                 | 4   |
| <b>2.2. Synthesis and Characterisation of <math>(R_3E)_3Pn_7</math></b> .....                                                                  | 4   |
| <b>2.2.1. Synthesis of <math>(Et_3Ge)_3P_7</math>, 2</b> .....                                                                                 | 4   |
| <b>2.2.2. Synthesis of <math>(nBu_3Sn)_3P_7</math>, 3</b> .....                                                                                | 6   |
| <b>2.2.3. Effort to Synthesis <math>(Et_3Ge)_3As_7</math></b> .....                                                                            | 8   |
| <b>2.2.4. Isolation of <math>(Et_3Ge)_5As_{11}</math>, 5</b> .....                                                                             | 9   |
| <b>2.2.5. Effort to Synthesis <math>(nBu_3Sn)_3As_7</math></b> .....                                                                           | 10  |
| <b>3. Identifying Symmetric vs. Asymmetric Functionalized Clusters</b> .....                                                                   | 12  |
| <b>3.1. Synthesis and Characterization Data for <math>(R_3E)_3Pn_7</math> Heteroallene Inserted Products</b> .....                             | 13  |
| <b>3.1.1. Synthesis of <math>(Me_3Ge-PhNCO)_3P_7</math>, 6</b> .....                                                                           | 13  |
| <b>3.1.2. Synthesis of <math>(Et_3Ge-PhNCO)_3P_7</math>, 7</b> .....                                                                           | 16  |
| <b>3.1.3. Synthesis of <math>(Me_3Ge-TsNCO)_3P_7</math>, 8</b> .....                                                                           | 19  |
| <b>3.1.4. Synthesis of <math>(Et_3Ge-TsNCO)_3P_7</math>, 9</b> .....                                                                           | 23  |
| <b>3.1.5. Synthesis of <math>(nBu_3Sn-TsNCO)_3P_7</math>, 10</b> .....                                                                         | 27  |
| <b>3.1.6. Synthesis of <math>(TMS-TsNCO)_3As_7</math>, 11</b> .....                                                                            | 31  |
| <b>4. IR data</b> .....                                                                                                                        | 34  |
| <b>5. CO<sub>2</sub> Reactivity</b> .....                                                                                                      | 36  |
| <b>6. Computational Studies</b> .....                                                                                                          | 40  |
| <b>6.1. Fluoride ion Affinity of <math>(R_3E)_3Pn_7</math> Clusters</b> .....                                                                  | 40  |
| <b>6.2. CO<sub>2</sub> Capture with <math>(R_3E)_3Pn_7</math> Clusters.</b> .....                                                              | 44  |
| <b>6.3. Optimised Structures BP86/SV(p) Level of Theory for FIA calculations</b> .....                                                         | 45  |
| <b>6.4. Optimised Structures BP86/SV(p) Level of Theory for HIA calculations</b> .....                                                         | 77  |
| <b>6.5. Optimised structures at the PBE1PBE/6-311G(d,p) level of theory for Compounds 6–11 N,N,N and O,O,O tetrel coordination modes</b> ..... | 105 |
| <b>6.6. Optimised Structures at the PBE1PBE/6-311G(d,p) Level of Theory for clusters reactivity towards CO<sub>2</sub></b> .....               | 147 |
| <b>7. Crystallography Tables</b> .....                                                                                                         | 180 |

## 1. Methods and materials

### 1.1. Experimental Considerations

All manipulations were performed under a nitrogen atmosphere using standard Schlenk-line and glovebox methodology. All glassware was flame-dried before use.

Innovative Technologies anhydrous engineering solvent purification system was used to obtain dry THF, Et<sub>2</sub>O, toluene and pentane. Solvents obtained in this way were subsequently degassed. DME was dried over Na and purified by distillation. Toluene-d<sub>8</sub>, C<sub>6</sub>D<sub>6</sub>, THF-d<sub>8</sub> and CDCl<sub>3</sub> were dried over 3 Å molecular sieves.

Elemental red phosphorus (Sigma-Aldrich), Elemental grey arsenic (Alfa-Aesar), Naphthalene (Fluorochem), Me<sub>3</sub>SiCl (Sigma-Aldrich), Me<sub>3</sub>SnCl (Sigma-Aldrich), <sup>n</sup>Bu<sub>3</sub>SnCl (Sigma-Aldrich), Me<sub>3</sub>GeCl (Alfa-Aesar), Et<sub>3</sub>GeCl (Alfa-Aesar), PhNCO (Sigma-Aldrich), PhNCS (Sigma-Aldrich), *p*-toluenesulfonyl isocyanate (Fluorochem) were purchased from respective vendors and used without further purification. Elemental sodium (Scientific Laboratories Supplies) was cleaned by removal of the oxide layer and washed with toluene/hexane. [Na(DME)<sub>x</sub>]<sub>3</sub>P<sub>7</sub>,<sup>1</sup> (Me<sub>3</sub>Ge)<sub>3</sub>P<sub>7</sub> and (Me<sub>3</sub>Si)<sub>3</sub>As<sub>7</sub> were synthesised using previously reported experimental procedures.<sup>1-3</sup>

### 1.2. Analytical Considerations

**NMR spectroscopy** – <sup>1</sup>H, <sup>13</sup>C{<sup>1</sup>H}, <sup>29</sup>Si DEPT90, <sup>31</sup>P, <sup>119</sup>Sn NMR spectra were recorded on a Bruker AVIII 400 spectrometer (operating frequencies: 399.78 MHz, 100.53 MHz, 79.48 MHz, 161.83 MHz and 149.14 MHz for <sup>1</sup>H, <sup>13</sup>C, <sup>29</sup>Si, <sup>31</sup>P and <sup>119</sup>Sn respectively). <sup>1</sup>H and <sup>13</sup>C chemical shifts were internally referenced to the residual solvent resonances (C<sub>6</sub>D<sub>6</sub>: <sup>1</sup>H δ = 7.16 ppm, <sup>13</sup>C{<sup>1</sup>H} δ = 128.02 ppm, THF-d<sub>8</sub>: <sup>1</sup>H δ = 3.58, 1.73 ppm, <sup>13</sup>C{<sup>1</sup>H} δ = 67.57, 25.37 ppm, toluene-d<sub>8</sub> <sup>1</sup>H δ = 7.09, 7.00, 6.98, 2.09 ppm, <sup>13</sup>C{<sup>1</sup>H} δ = 137.86, 129.24, 128.33, 125.49, 20.4 ppm, CDCl<sub>3</sub>: <sup>1</sup>H δ = 7.26 ppm, <sup>13</sup>C{<sup>1</sup>H} δ = 77.36 ppm). <sup>29</sup>Si, <sup>31</sup>P and <sup>119</sup>Sn chemical shifts were externally referenced to Me<sub>4</sub>Si, H<sub>3</sub>PO<sub>4</sub> and Me<sub>4</sub>Sn respectively. NMR samples were prepared under an inert nitrogen atmosphere in a 5 mm J Young NMR tube.

**Elemental analysis** – Elemental analysis was carried out by the microanalysis service of the University of Manchester using a Flash 2000 elemental analyser.

**Mass spectrometry** – Mass spectrometry was carried out by the mass spectrometry service of the University of Manchester using an electrospray ionisation equipped Thermo Orbitrap Executive Plus Extended Mass Range mass spectrometer. Mass spectrometry samples were prepared under an inert nitrogen atmosphere and injected directly into the ionisation source of the spectrometer.

**Infrared spectroscopy** - ATR-IR spectra were recorded as microcrystalline powders or oils using a Bruker Tensor 27 spectrometer under an inert nitrogen atmosphere.

### 1.3. X-ray diffraction Studies

**Data collection:** X-ray diffraction data was collected for compounds **5**, **6**, **7**, **8** and **11** on a dual source Rigaku FR-X rotating anode at 100 K with Cu-K $\alpha$  (1.54184 Å) radiation, equipped with a Hypix000HE detector and Oxford cryosystem. X-ray data was collected using CrysAlisPro software.

**Crystal structure determination and refinements:** X-ray data processed and reduced using CrysAlisPro. Absorption correction was performed using empirical methods (SCALE3 ABSPACK) based upon symmetry-equivalent reflections combined with measurements at different azimuthal angles. The crystal structure was solved and refined against all  $F^2$  values using the SHELX and Olex2 suite of programmes.<sup>4, 5</sup> All atoms were refined anisotropically. Hydrogen atoms were placed in calculated positions and refined using idealised geometries and assigned fixed isotropic displacement parameters.

Crystallographic data have been deposited with the CCDC (CCDC 2202018-2202022).

### 1.4. General computational considerations

Density Functional Theory (DFT) calculations were performed with the Gaussian09 program package3 (version g09, rev.d01).<sup>6-8</sup> Geometry optimisation and frequency calculations were performed at the BP86/SV(p) or PBE1PBE/6-311G(d,p) levels of theory. The SV(p) basis set was used for Sn atoms. No symmetry constraints were applied during optimisation. All minima were confirmed by the absence of imaginary frequencies. Initial geometries were prepared using X-ray diffraction coordinates where available and Facio V22.1.1.64 software. Gibbs free

energies and enthalpies were calculated at standard conditions ( $p = 1 \text{ atm}$ ,  $T = 298 \text{ K}$ ) and are unscaled.

## 2. Synthesis and Characterisation Data

### 2.1. Synthesis of $[\text{K}_3(\text{DME})_x][\text{As}_7]$

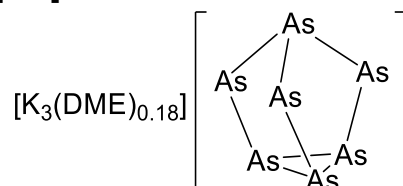

A Schlenk flask was loaded with grey arsenic (4.50 g, 60 mmol, 7 eq.), potassium (1.00 g, 25 mmol, 3 eq.) and naphthalene (109 mg, 0.85 mmol, 0.1 eq.). The powder mixture was cooled to  $0 \text{ }^\circ\text{C}$  and suspended in THF (18 mL) and DME (18 mL). The reaction mixture was stirred while closely monitoring the temperature of the reaction, cooling if the temperature exceeded  $50 \text{ }^\circ\text{C}$ , to prevent auto-acceleration. Once a stable temperature had been reached, the reaction was left to stir overnight to give a dark suspension. The headspace of the flask was removed under vacuum and the reaction mixture was slowly heated to  $55 \text{ }^\circ\text{C}$  over the course of a day and left to stir over 7 days until a red suspension was observed. The suspension was cooled to room temperature and was washed with pentane (3 x 40 mL). The product was then dried under vacuum over the course of a day, yielding a red powder (4.98 g). Elemental analysis (Found: C 1.34, H 0.23) was used to determine the DME content as 0.18 equivalents. All characterization data was in line with literature precedence.<sup>9, 10</sup>

**Mass spectrometry (ESI pos/neg):** For  $\text{K}_3\text{As}_7+\text{H}$  ( $[\text{M}+\text{H}]^+$ ): Calcd.: 642.3507; found: 642.3507.

### 2.2. Synthesis and Characterisation of $(\text{R}_3\text{E})_3\text{Pn}_7$

#### 2.2.1. Synthesis of $(\text{Et}_3\text{Ge})_3\text{P}_7$ , 2

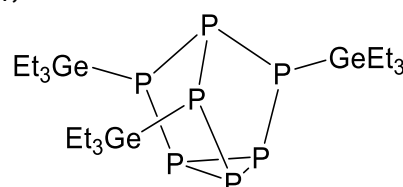

A Schlenk flask was loaded with a stir bar and  $[\text{Na}(\text{DME})_x]_3[\text{P}_7]$  (2.0 g, 7.0 mmol), which were suspended in toluene (10 mL) to give a dark green suspension. The suspension was cooled to  $-80 \text{ }^\circ\text{C}$  and  $\text{Et}_3\text{GeCl}$  (3.5 mL, 21 mmol) was added dropwise with rapid stirring, affording a

yellow green solution with a brown suspension. The reaction was left to stir for 2 days, the reaction was then filtered and the residue washed with toluene (3 x 3 mL). Solvent was subsequently removed to give a yellow/green liquid. The crude product was then washed with toluene (3 mL) and dried under reduced pressure, and the product isolated as an oil.

**Isolated yield:** 2.97 g, 61%

**$^1\text{H}$  NMR (400 MHz, 298 K, THF- $d_8$ ):**  $\delta$  = 1.17 (t,  $^3J_{\text{HH}}$  = 7.4 Hz, 9H,  $\text{CH}_3$ ), 1.08 (q,  $^3J_{\text{HH}}$  = 7.9 Hz, 6H,  $\text{CH}_2$ ) ppm.

**$^{13}\text{C}\{^1\text{H}\}$  NMR (101 MHz, 298 K, THF- $d_8$ ):**  $\delta$  = 9.9 (s,  $\text{CH}_2$ ), 9.6 (s,  $\text{CH}_3$ ) ppm.

**$^{31}\text{P}$  NMR (162 MHz, 298K, THF- $d_8$ ):**  $\delta$  = -4.4 - -13.1 (m, 3P, *bridging*), -103.6 (qq,  $^1J_{\text{PP}}$  = 332.4 Hz,  $^2J_{\text{PP}}$  = 48.1 Hz, 1P, *apical*), -163.6 - -170.0 (m, 3P, *basal*) ppm.

**Mass spectrometry (ESI pos/neg):** For  $\text{C}_{18}\text{H}_{45}\text{Ge}_3\text{P}_7+\text{Li}$  ( $[\text{M}+\text{Li}]^+$ ): Calcd.: 706.9480; found: 706.9499.

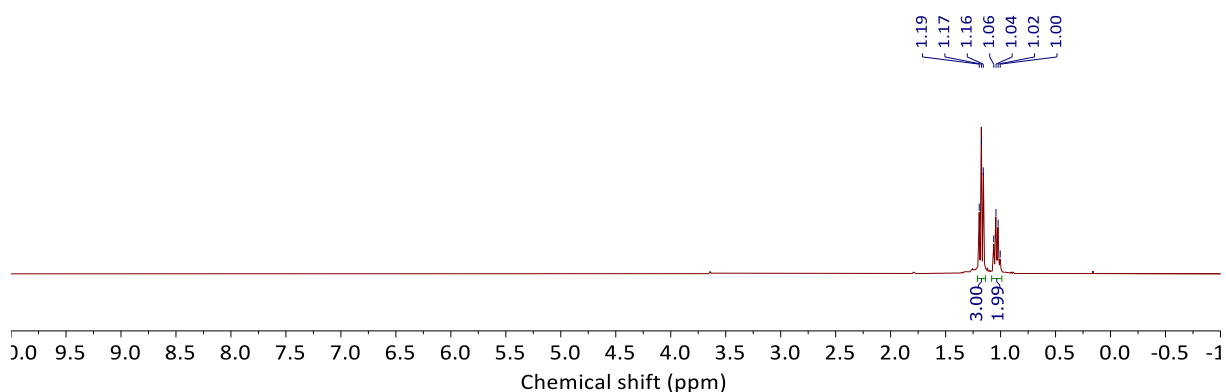

**Figure S1.**  $^1\text{H}$  NMR spectrum (THF- $d_8$ ) of **2**.

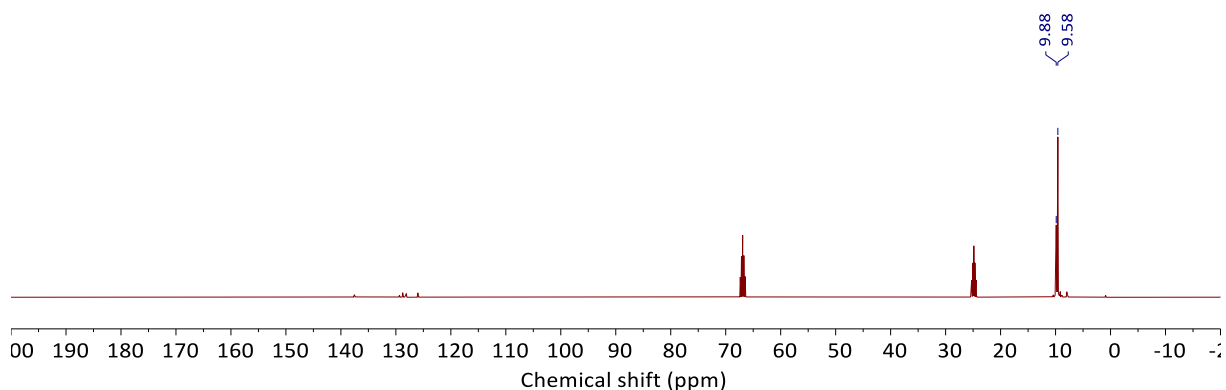

**Figure S2.**  $^{13}\text{C}\{^1\text{H}\}$  NMR spectrum (THF- $d_8$ ) of **2**.

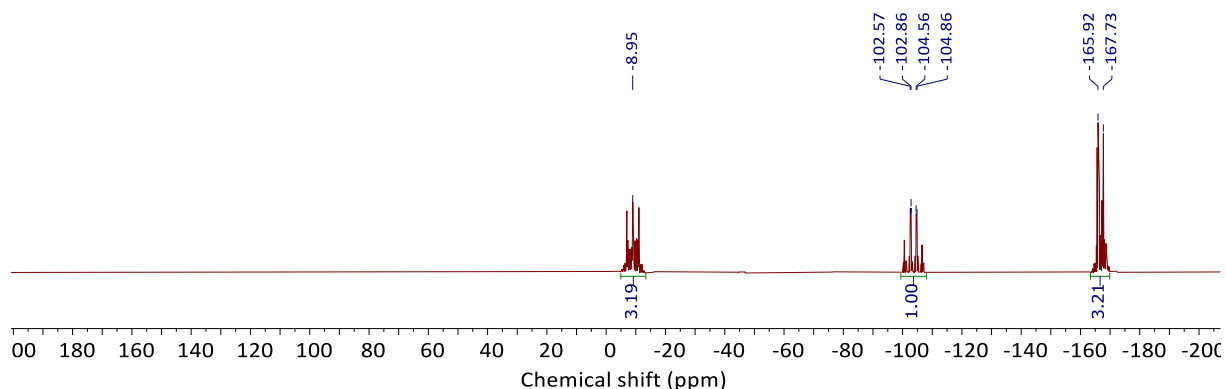

**Figure S3.**  $^{31}\text{P}$  NMR spectrum (THF- $d_8$ ) of **2**.

### 2.2.2. Synthesis of $(^n\text{Bu}_3\text{Sn})_3\text{P}_7$ , **3**

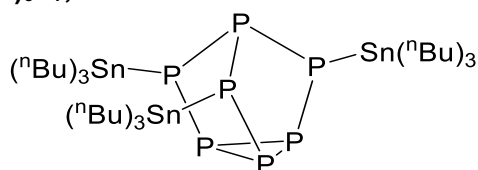

A Schlenk flask was loaded with a stir bar and  $[\text{Na}(\text{DME})_x]_3[\text{P}_7]$  (500 mg, 1.75 mmol). Toluene (10 mL) was added to give a dark green suspension. The suspension was cooled, while stirring, to  $-80\text{ }^\circ\text{C}$ . Once cooled,  $^n\text{Bu}_3\text{SnCl}$  (1.40 mL, 5.25 mmol) was added dropwise with rapid stirring. The reaction was allowed to warm up to room temperature, by which point, a yellow/green solution with a black suspension was observed. The reaction was stirred for 5 days. The reaction was then filtered and solvent removed to give the product as a yellow oil. The crude product was washed with ether (3 mL) and dried at  $50\text{ }^\circ\text{C}$  under reduced pressure until traces of  $^n\text{Bu}_3\text{SnCl}$  were removed.

**Isolated yield:** 980 mg, 52%

$^1\text{H}$  NMR (400 MHz, 298 K, Toluene- $d_8$ ):  $\delta$  = 1.53 - 1.41 (m, 6H,  $\text{CH}_2\text{CH}_2\text{CH}_2\text{CH}_3$ ), 1.20 (tt,  $^3J_{\text{HH}}$  = 7.4 Hz, (pseudo sextet), 6H,  $\text{CH}_2\text{CH}_2\text{CH}_2\text{CH}_3$ ), 0.94 (t,  $^3J_{\text{HH}}$  = 8.2 Hz, 6H,  $\text{CH}_2\text{CH}_2\text{CH}_2\text{CH}_3$ ), 0.79 (t,  $^3J_{\text{HH}}$  = 7.3 Hz, 9H,  $\text{CH}_2\text{CH}_2\text{CH}_2\text{CH}_3$ ) ppm.

$^{13}\text{C}\{^1\text{H}\}$  NMR (101 MHz, 298 K, Toluene- $d_8$ ):  $\delta$  = 29.7 (s,  $\text{CH}_2\text{CH}_2\text{CH}_2\text{CH}_3$ ), 27.3 (s,  $\text{CH}_2\text{CH}_2\text{CH}_2\text{CH}_3$ ), 14.9 (s,  $\text{CH}_2\text{CH}_2\text{CH}_2\text{CH}_3$ ), 13.6 (s,  $\text{CH}_2\text{CH}_2\text{CH}_2\text{CH}_3$ ) ppm.

$^{31}\text{P}$  NMR (162 MHz, 298K, Toluene- $d_8$ ):  $\delta$  =  $-13.3$  -  $-24.0$  (m, 3P, *bridging*),  $-88.3$  (qq  $^1J_{\text{PP}}$  = 306.8 Hz,  $^2J_{\text{PP}}$  = 50.4 Hz, 1P, *apical*),  $-159.6$  -  $-167.8$  (m, 3P, *basal*) ppm.

$^{119}\text{Sn}$  NMR (149 MHz, 298K, Toluene- $d_8$ ):  $\delta$  = 20.4 (d,  $^1J_{\text{SnP}}$  = 777.5 Hz,  $^n\text{Bu}_3\text{Sn}$ ) ppm.

**Mass spectrometry (ESI pos/neg):** For  $\text{C}_{36}\text{H}_{81}\text{Sn}_3\text{P}_7+\text{Na}$  ( $[\text{M}+\text{Na}]^+$ ): Calcd.: 1113.1465; found: 1113.3469.

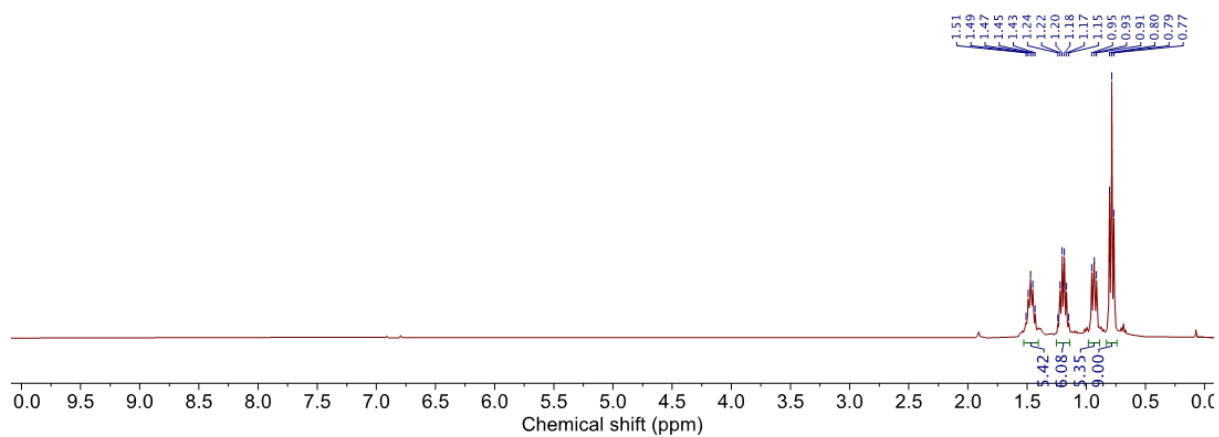

**Figure S4.**  $^1\text{H}$  NMR spectrum (Toluene- $d_8$ ) of **3**.

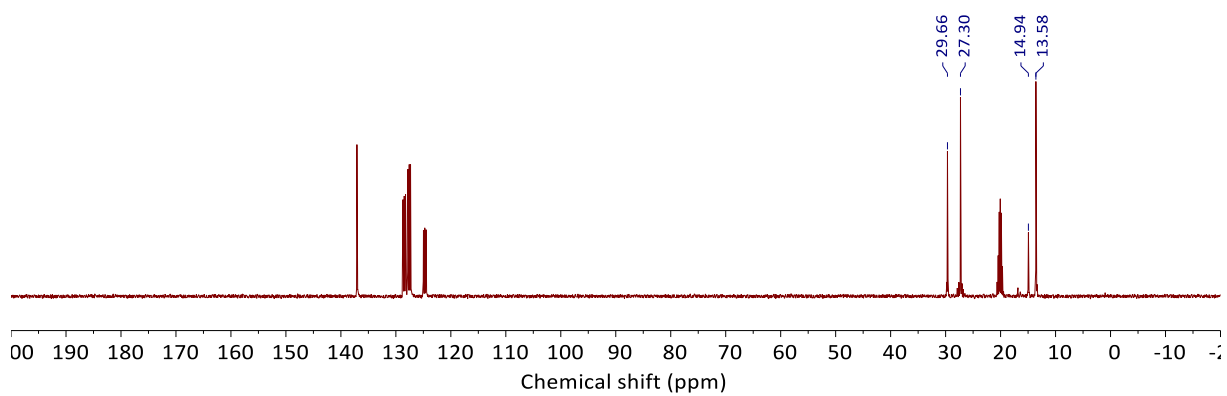

**Figure S5.**  $^{13}\text{C}\{^1\text{H}\}$  NMR spectrum (Toluene- $d_8$ ) of **3**.

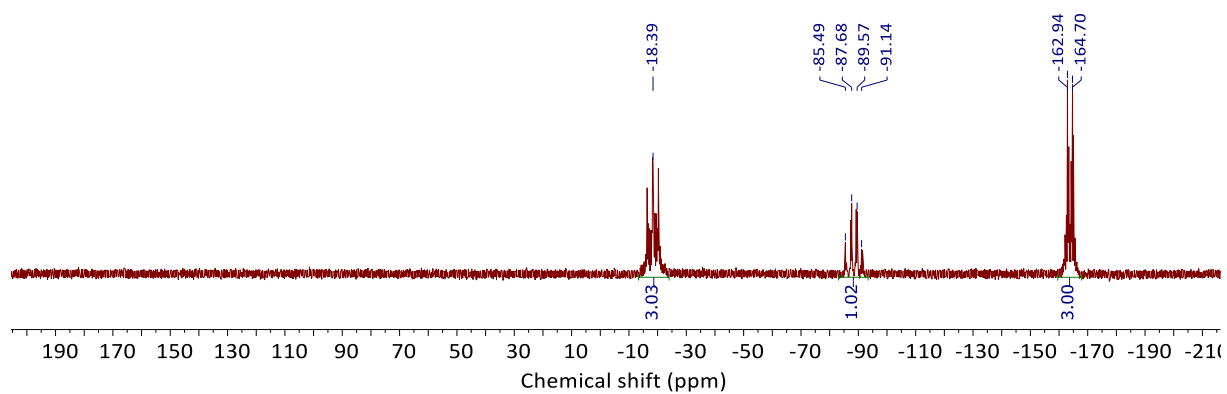

**Figure S6.**  $^{31}\text{P}$  NMR spectrum (Toluene- $d_8$ ) of **3**.

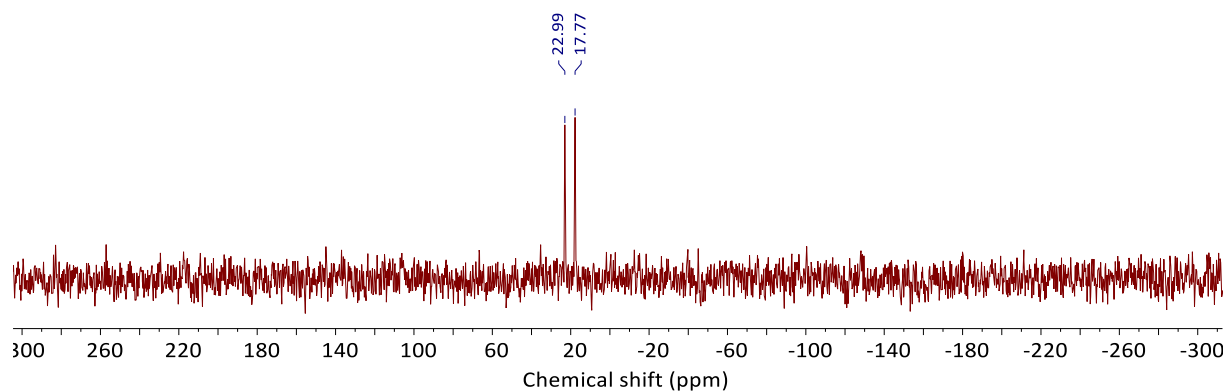

**Figure S7.**  $^{119}\text{Sn}$  NMR spectrum (Toluene- $d_8$ ) of **3**.

### 2.2.3. Effort to Synthesis $(\text{Et}_3\text{Ge})_3\text{As}_7$

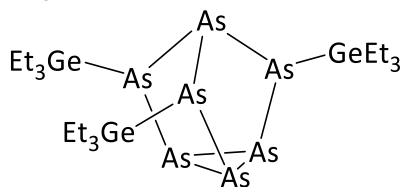

A Schlenk flask was loaded with  $[\text{K}_3(\text{DME})_{0.18}][\text{As}_7]$  (500 mg, 0.78 mmol) and a stir bar. The contents were suspended in toluene (15 mL) and the suspension was cooled to  $-80\text{ }^\circ\text{C}$ .  $\text{Et}_3\text{GeCl}$  (560 mg, 2.34 mmol) was added dropwise while stirring rapidly. The solution was allowed to warm to room temperature. Over the course of 2 hours at room temperature, the suspension turned dark purple, then black, with a red solution. The reaction was stirred for 7 days. After this, the reaction was filtered and the black residue was washed with toluene (3 x 5 mL). The solvent was removed under reduced pressure, yielding a dark red oil.

**Yield:** 233 mg, 30%

**$^1\text{H}$  NMR (400 MHz, 298 K, Toluene- $d_8$ ):**  $\delta = 1.13 - 1.09$  (overlapping multiplets, 75H,  $\text{CH}_2\text{CH}_3$ ) ppm.

**$^{13}\text{C}\{^1\text{H}\}$  NMR (101 MHz, 298 K, Toluene- $d_8$ ):**  $\delta = 11.4$  (s,  $\text{CH}_2\text{CH}_3$ ), 10.5 (s,  $\text{CH}_2\text{CH}_3$ ) ppm.

**Mass spectrometry (APCI):** For  $\text{C}_{18}\text{H}_{45}\text{As}_7\text{Ge}_3$  Calcd.: 1007.5668; found: 1007.5676.



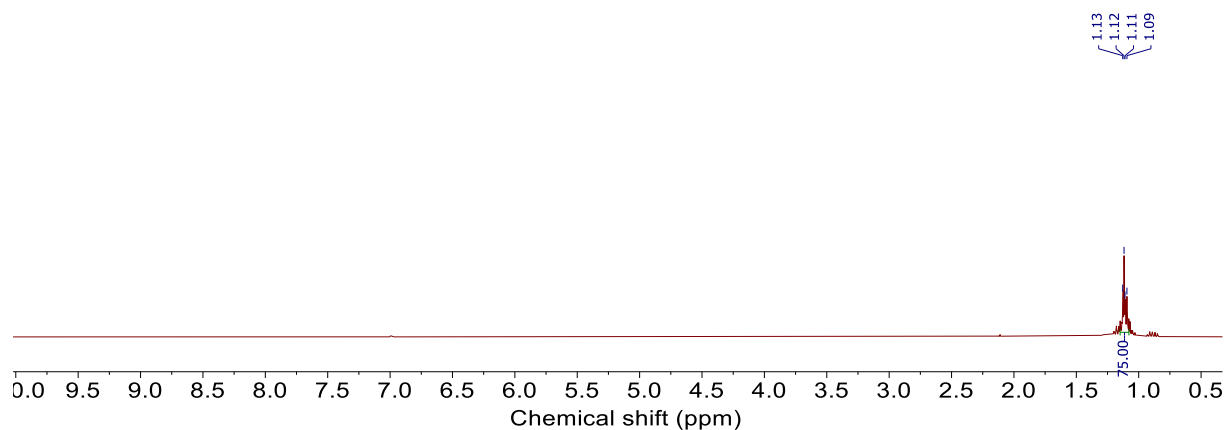

**Figure S8:**  $^1\text{H}$  NMR spectrum (Toluene- $d_8$ ).

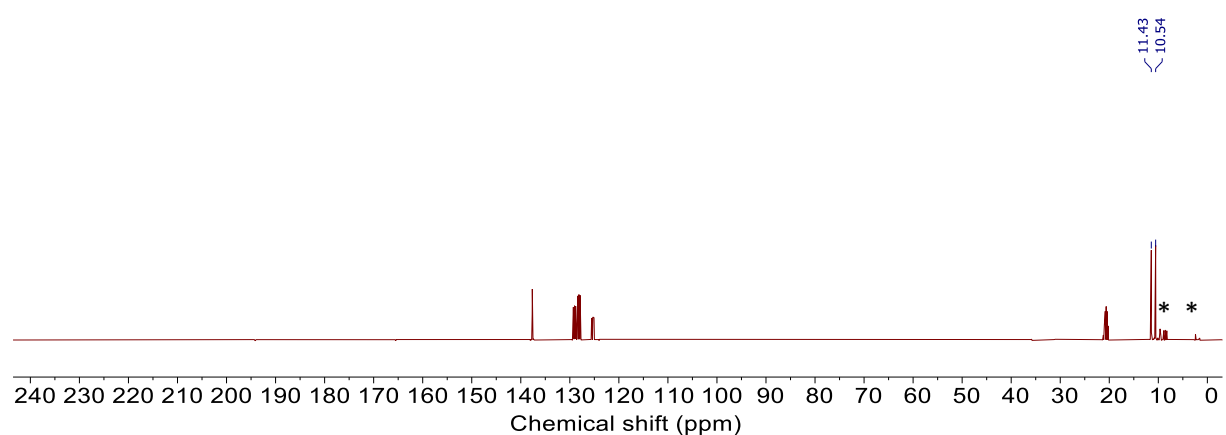

**Figure S9.**  $^{31}\text{C}\{^1\text{H}\}$  NMR spectrum (Toluene- $d_8$ ) Unknown impurities labelled with a \*.

#### 2.2.4. Detection of $(\text{Et}_3\text{Ge})_5\text{As}_{11}$ , **5**

If the batch of  $[\text{K}_3(\text{DME})_{0.18}][\text{As}_7]$  employed during the synthesis of  $(\text{Et}_3\text{Ge})_3\text{As}_7$  features the  $[\text{As}_{11}]^{5-}$  impurity (detected by mass spectrometry), then crystals grew from the neat red oil isolated from section 2.2.4. XRD diffraction studies into these crystals confirmed the structure of **5**.

**Yield of the Crystalline Material:** 243 mg, 62%

**Mass spectrometry (APCI):** For  $\text{C}_{30}\text{H}_{75}\text{As}_{11}\text{Ge}_5$  Calcd.: 1629.3303; found: 1629.3453.

For  $\text{C}_{18}\text{H}_{45}\text{As}_7\text{Ge}_3$  Calcd.: 1007.5668; found: 1007.5676.

*Note: Both  $(\text{Et}_3\text{Ge})_3\text{As}_7$  and **5** were present in the sample.*

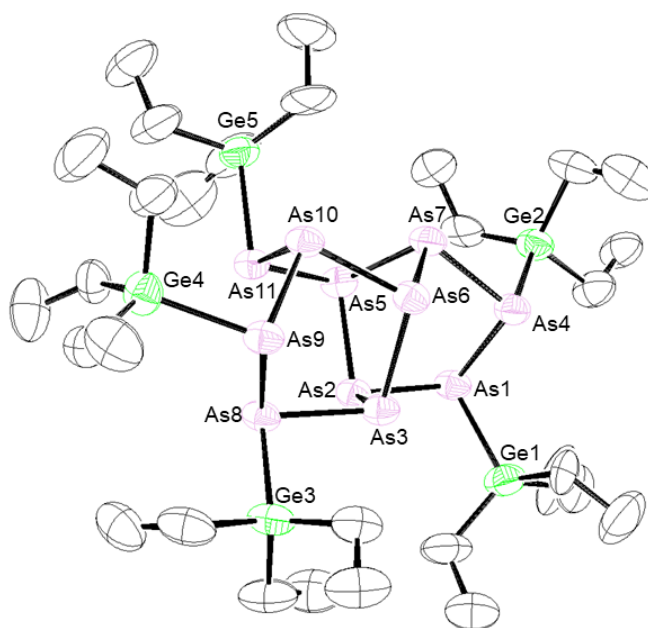

**Figure S10.** Molecular structure of **5**. Anisotropic displacement ellipsoids captured at 50% probability. Hydrogen atoms have been omitted for clarity. Arsenic: plum; Germanium: green; Carbon: white.

### 2.2.5. Effort to Synthesis $({}^n\text{Bu}_3\text{Sn})_3\text{As}_7$

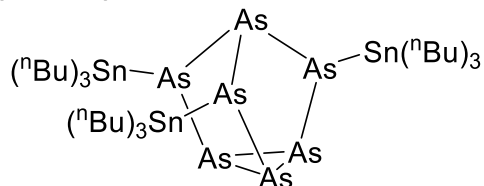

A Schlenk flask was loaded with  $[\text{K}_3(\text{DME})_{0.18}]\text{As}_7$  (500 mg, 0.78 mmol) and a stir bar. The contents were suspended in toluene (10 mL). The suspension was cooled to  $-80\text{ }^\circ\text{C}$  and  ${}^n\text{Bu}_3\text{SnCl}$  (0.60 mL, 2.34 mmol) was added with strong stirring. The reaction was allowed to warm to room temperature, by which point a red solution with a black suspension was observed. The reaction was stirred for 4 days. The solvent was filtered off and residue washed with toluene (3 x 5 mL). The solvent was removed under reduced pressure to give a red oil. NMR analysis revealed the presence of unreacted  ${}^n\text{Bu}_3\text{SnCl}$ , which was difficult to separate from **6** due to their similar solubility. Attempts were made at removing excess  ${}^n\text{Bu}_3\text{SnCl}$  from the reaction mixture, including washing with the non-polar solvents pentane and ether, and by distillation under reduced pressure, but these proved to be unsuccessful and heating higher than  $40\text{ }^\circ\text{C}$  caused cluster decomposition.

${}^{119}\text{Sn}$  NMR yield: 62%

**$^1\text{H}$  NMR (400 MHz, 298 K, THF- $d_8$ ):**  $\delta$  = 1.75 - 1.61 (m, 6H,  $^n\text{Bu}$ ), 1.46 - 1.36 (m, 6H,  $^n\text{Bu}$ ), 1.29 - 1.10 (m, 6H,  $^n\text{Bu}$ ), 0.99 - 0.94 (m, 9H,  $^n\text{Bu}$ ) ppm.

**$^{13}\text{C}\{^1\text{H}\}$  NMR (101 MHz, 298 K, THF- $d_8$ ):**  $\delta$  = 31.7 (s,  $\text{CH}_2\text{CH}_2\text{CH}_2\text{CH}_3$ ), 29.7 (s,  $\text{CH}_2\text{CH}_2\text{CH}_2\text{CH}_3$ , unreacted  $^n\text{Bu}_3\text{SnCl}$ ), 29.1 (s,  $\text{CH}_2\text{CH}_2\text{CH}_2\text{CH}_3$ ), 28.6 (s,  $\text{CH}_2\text{CH}_2\text{CH}_2\text{CH}_3$ ), 19.4 (s,  $\text{CH}_2\text{CH}_2\text{CH}_2\text{CH}_3$ ), 17.3 (s,  $\text{CH}_2\text{CH}_2\text{CH}_2\text{CH}_3$ , unreacted  $^n\text{Bu}_3\text{SnCl}$ ), 15.0 (s,  $\text{CH}_2\text{CH}_2\text{CH}_2\text{CH}_3$ ), 14.9 (s,  $\text{CH}_2\text{CH}_2\text{CH}_2\text{CH}_3$ , unreacted  $^n\text{Bu}_3\text{SnCl}$ ) ppm.

**$^{119}\text{Sn}$  NMR (149 MHz, 298 K, THF- $d_8$ ):**  $\delta$  = 109.4 (s,  $^n\text{Bu}_3\text{SnCl}$ ), 27.3 (s,  $(^n\text{Bu}_3\text{Sn})_3\text{As}_7$ ) ppm.

**Mass spectrometry (APCI):** For  $\text{C}_{36}\text{H}_{81}\text{Sn}_3\text{As}_7+\text{H}$  ( $[\text{M}+\text{H}]^+$ ): Calcd.: 1394.7963; found: 1394.7997.

*Note:  $^1\text{H}$  NMR Integrations could not be definitively assigned due to overlapping signals of **6** and  $^n\text{Bu}_3\text{SnCl}$ .*

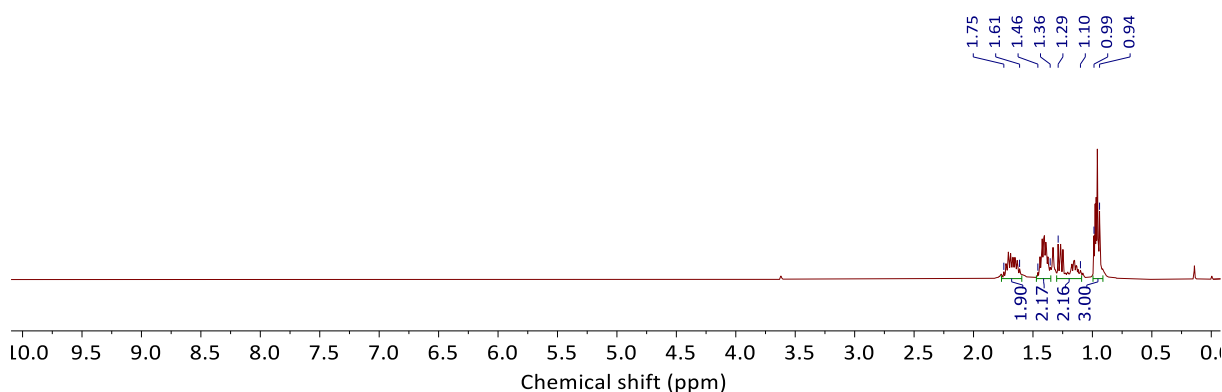

**Figure S11.** Crude  $^1\text{H}$  NMR spectrum (THF- $d_8$ ) of  $(^n\text{Bu}_3\text{Sn})_3\text{As}_7$ .

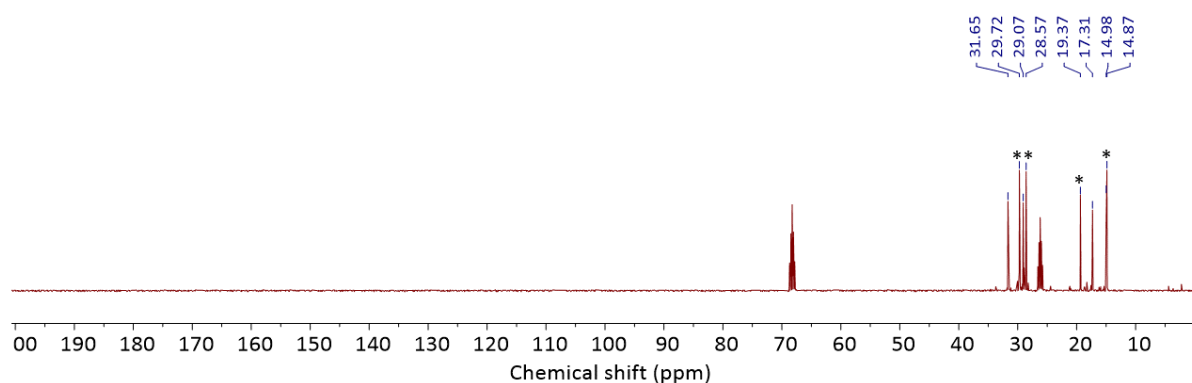

**Figure S12.** Crude  $^{13}\text{C}\{^1\text{H}\}$  NMR spectrum (THF- $d_8$ ) of  $(^n\text{Bu}_3\text{Sn})_3\text{As}_7$ , unreacted  $^n\text{Bu}_3\text{SnCl}$  is marked with a \*.

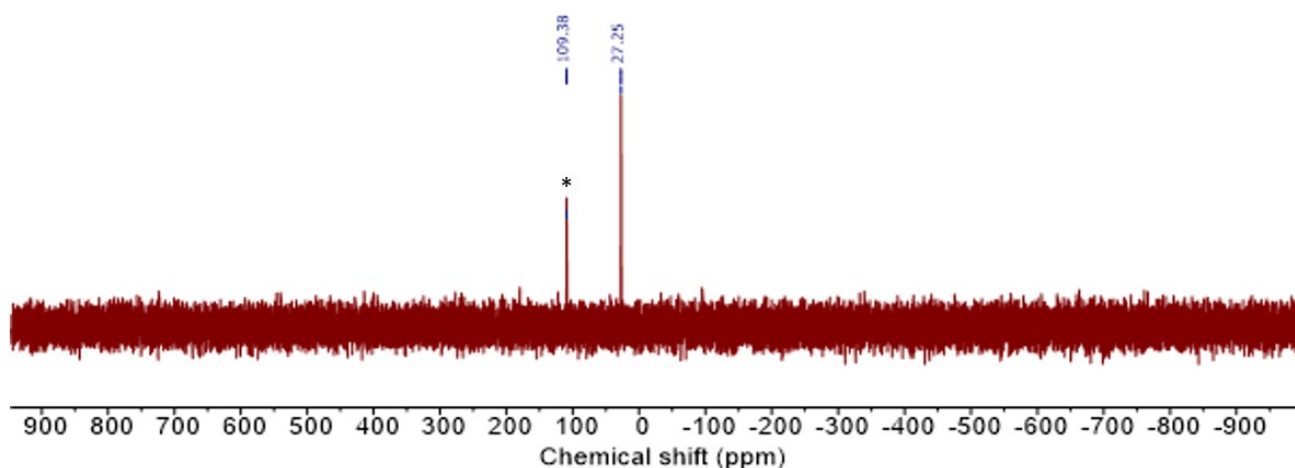

**Figure S13.** Crude  $^{119}\text{Sn}$  NMR spectrum (THF- $d_8$ ) of  $(n\text{Bu}_3\text{Sn})_3\text{As}_7$ , unreacted  $n\text{Bu}_3\text{SnCl}$  is marked with a \*.

### 3. Identifying Symmetric vs. Asymmetric Functionalized Clusters

The geometry at the bridging phosphorus atoms of the  $[\text{P}_7]$  core for functionalized clusters is pyramidal and introduces chirality. Further, there are two possible isomers a symmetric coordination mode (Figure S14, **A**) and an asymmetric coordination mode (Figure S14, **B**). In 2011, Hassler and co-workers studied the **A** and **B** isomers of  $(\text{Me}_3\text{Si})_3\text{P}_7$  using density functional theory (DFT) and  $^{31}\text{P}$  NMR spectroscopy.<sup>11</sup> The symmetric coordination mode **A** gives three unique phosphorus magnetic environments (apical, bridging, and basal), while in the asymmetric coordination mode **B** all seven of the phosphorus atoms are magnetically inequivalent. The symmetric coordination mode **A** is expected to be the thermodynamic product, and has been selectively detected with  $[\text{P}_7]$  cages that feature bulky functional groups.<sup>11, 12</sup> The  $^{31}\text{P}$  NMR spectrum of **6** and **7** showed three resonances corresponding to the apical, bridging, and basal phosphorus environments. Whereas, the  $^{31}\text{P}$  NMR spectrum of **8-10**, display ten resonances, in line with both **A** and **B** isomers being present. These **A** and **B** isomers were identified with  $^{31}\text{P}$  NMR COSY experiments.

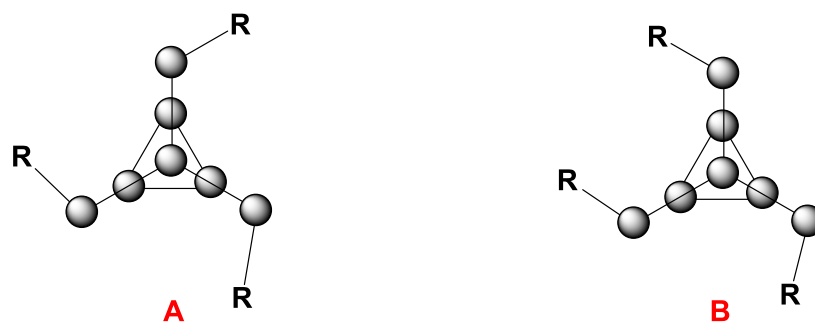

**Figure S14.** Symmetric (A) and Asymmetric (B) Isomers of Functionalised [P<sub>7</sub>] Cages.

### 3.1. Synthesis and Characterization Data for (R<sub>3</sub>E)<sub>3</sub>Pn<sub>7</sub> Heteroallene Inserted Products

#### 3.1.1. Synthesis of (Me<sub>3</sub>Ge-PhNCO)<sub>3</sub>P<sub>7</sub>, 6

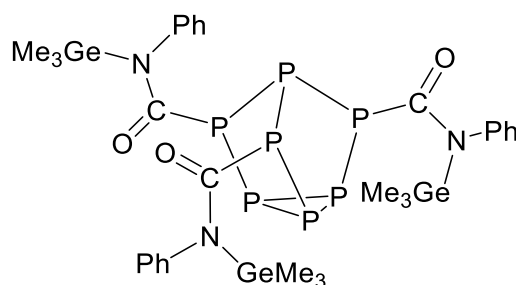

A Schlenk flask was loaded with a stir bar. (Me<sub>3</sub>Ge)<sub>3</sub>P<sub>7</sub> (100 mg, 0.18 mmol) was dissolved in pyridine (2 mL). To this solution, PhNCO (64 mg, 0.54 mmol) was added affording an intense orange solution which turned to a clear light yellow solution after an hour. The reaction was left to stir for 4 days, by which point, a light yellow solution was observed. Pyridine was removed under reduced pressure, affording a yellow glassy solid. The residue was dissolved in Et<sub>2</sub>O (2 mL). Slow evaporation of this solution gave needle shaped crystals which were washed with pentane (2 mL) yielding a white powder. Crystals that were suitable for X-ray diffraction were grown through the slow evaporation of an Et<sub>2</sub>O solution of the product.

**Isolated yield:** 107 mg, 72%

**<sup>1</sup>H NMR (400 MHz, 298 K, THF-d<sub>8</sub>):** δ = 7.58 - 7.43 (m, 15H, *Ph*), 0.31 (s, 27H, *CH*<sub>3</sub>) ppm.

**<sup>13</sup>C{<sup>1</sup>H} NMR (101 MHz, 298 K, THF-d<sub>8</sub>):** δ = 144.3 (s, *Ph*), 130.5 (s, *Ph*), 129.8 (s, *Ph*), 128.8 (s, *Ph*), 1.8 (s, *CH*<sub>3</sub>) ppm.

**<sup>31</sup>P NMR (162 MHz, 298 K, THF-d<sub>8</sub>):** δ = 133.2 - 127.3 (m, 3P, *bridging*), -123.5 - -131.7 (m, 1P, *apical*), -171.4 - -177.4 (m, 3P, *basal*) ppm.

**Mass spectrometry (ESI neg/pos):** For  $C_{30}H_{42}Ge_3N_3O_3P_7+Na$  ( $[M+Na]^+$ ): Calcd.: 953.8923; found: 953.8936.

**Elemental analysis:** For  $C_{30}H_{42}Ge_3N_3O_3P_7$ : Calcd.: C 38.85, H 4.57, N 4.53; found: C 39.48, H 4.76, N 4.25.

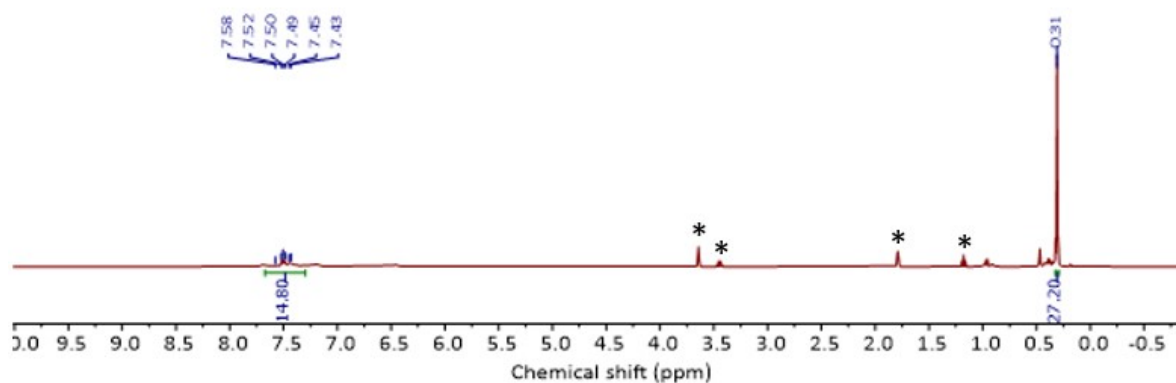

**Figure S15.**  $^1H$  NMR spectrum (THF- $d_8$ ) of **6**. Residual THF and diethyl ether signals are marked with a \*.

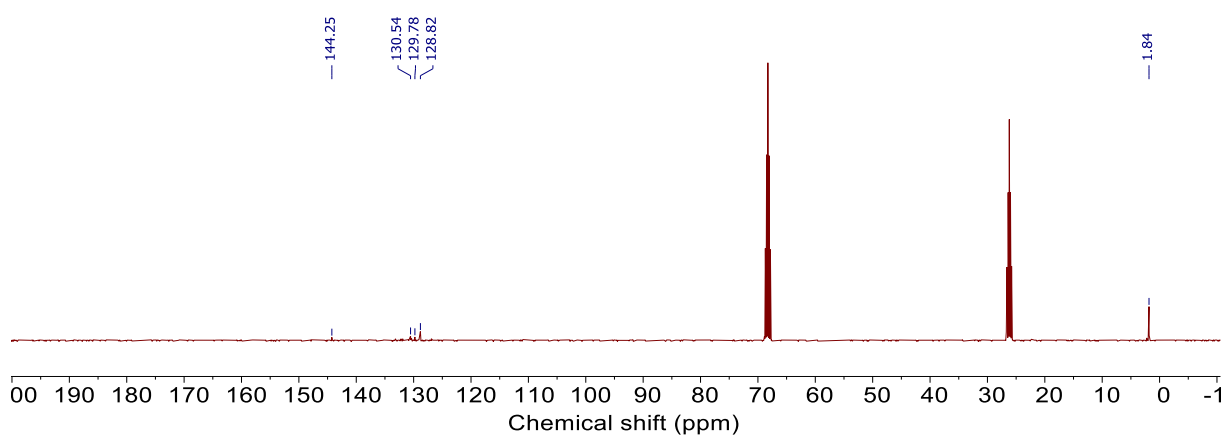

**Figure S16.**  $^{13}C\{^1H\}$  NMR spectrum (THF- $d_8$ ) of **6**.

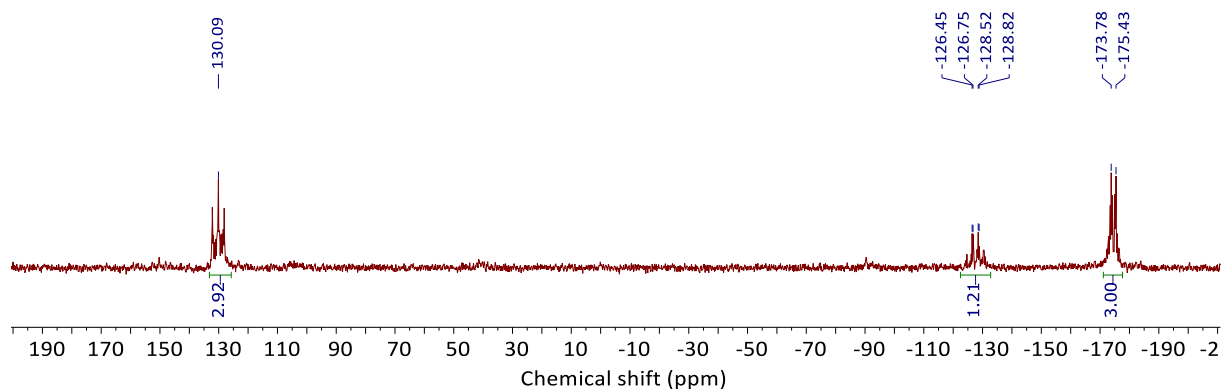

**Figure S17.**  $^{31}P$  NMR spectrum (THF- $d_8$ ) of **6**.

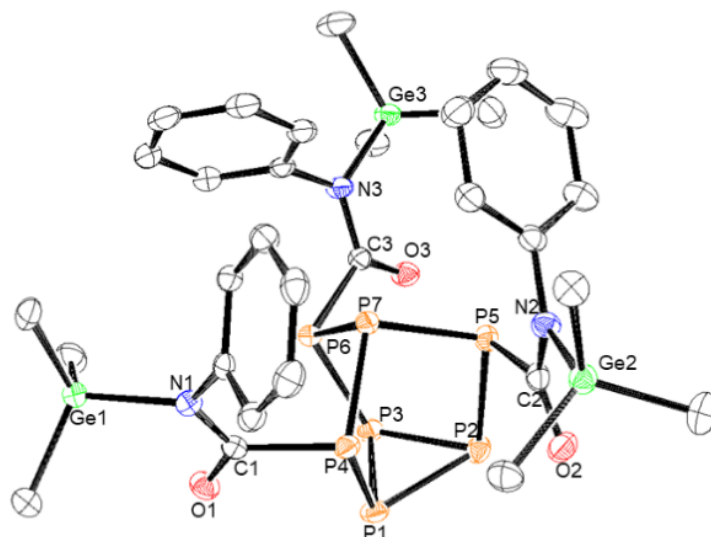

**Figure S18.** Molecular structure of **6**. Anisotropic displacement ellipsoids captured at 50% probability. Hydrogen atoms have been omitted for clarity. Phosphorus: orange; Nitrogen: blue; Oxygen: red; Germanium: green; Carbon: white.

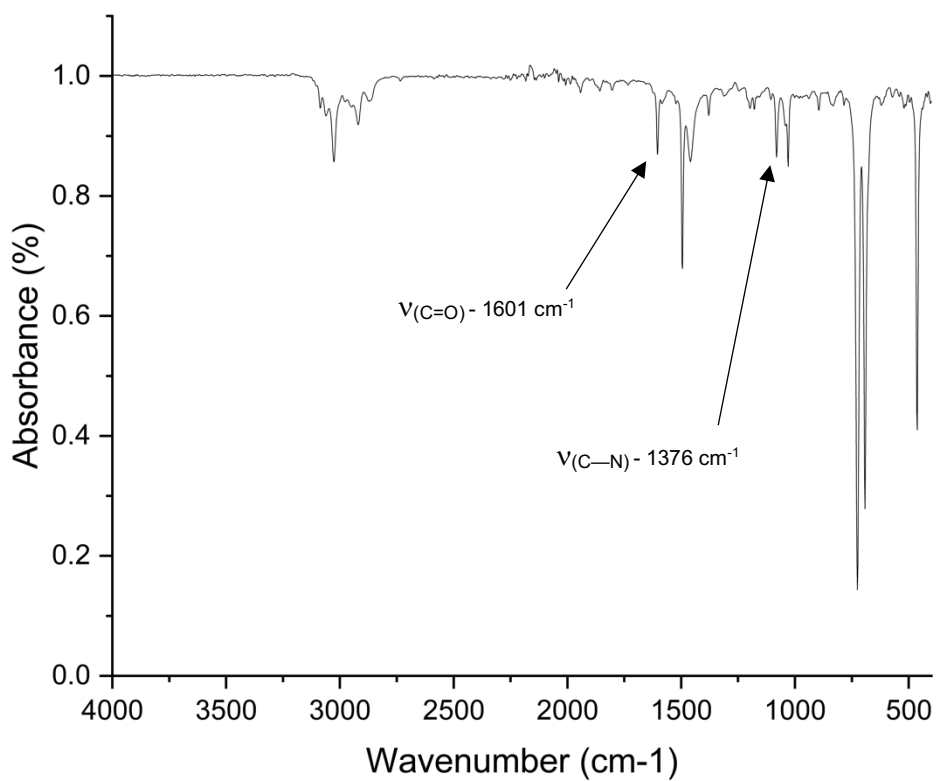

**Figure S19.** IR spectrum of **6**.

### 3.1.2. Synthesis of $(\text{Et}_3\text{Ge-PhNCO})_3\text{P}_7$ , 7

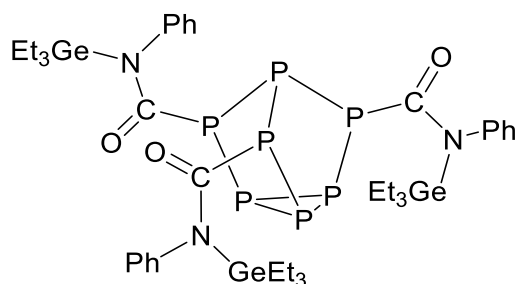

A Schlenk flask was loaded with a stir bar.  $(\text{Et}_3\text{Ge})_3\text{P}_7$  (500 mg, 0.72 mmol) was dissolved in pyridine (10 mL). To this solution, PhNCO (250 mg, 2.16 mmol) was added, yielding a yellow/green solution. Reaction was allowed to stir for 2 days. Solvent was removed under reduced pressure, to give a green waxy solid. The residue was dissolved in  $\text{Et}_2\text{O}$  (5 mL). Slow evaporation of  $\text{Et}_2\text{O}$  yielded block crystals. Crystals were washed with pentane (5 mL) affording a white crystalline solid. Crystals that were suitable for X-ray diffraction analysis were grown through the slow evaporation of an  $\text{Et}_2\text{O}$  solution of the product.

**Isolated yield:** 487 mg, 64%

**$^1\text{H}$  NMR (400 MHz, 298 K,  $\text{THF-d}_8$ ):**  $\delta$  = 7.80 - 7.34 (m, 15 H, *Ph*), 1.29 - 0.79 (m, 45 H,  $\text{CH}_2\text{CH}_3$ ) ppm.

**$^{13}\text{C}\{^1\text{H}\}$  NMR (101 MHz, 298 K,  $\text{THF-d}_8$ ):**  $\delta$  = 179.5 (d,  $^1J_{\text{CP}}$  = 49 Hz  $(\text{Et}_3\text{Ge-PhNCO})_3\text{P}_7$ ) 144.1 (s, *Ph*), 133.2 (s, *Ph*), 132.1 (s, *Ph*), 128.6 (s, *Ph*), 9.4 (s,  $\text{CH}_2$ ), 8.1 (s,  $\text{CH}_3$ ) ppm.

**$^{31}\text{P}$  NMR (162 MHz, 298 K,  $\text{THF-d}_8$ ):**  $\delta$  = 139.5 - 123.9 (m, 3P, *bridging*), -133.4 (qq,  $^1J_{\text{PP}}$  = 339.7 Hz,  $^2J_{\text{PP}}$  = 49.0 Hz, 1P, *apical*), -173.9 - -187.5 (m, 3P, *basal*) ppm.

**Mass spectrometry (ESI neg/pos):**  $\text{C}_{39}\text{H}_{60}\text{Ge}_3\text{N}_3\text{O}_3\text{P}_7+\text{Na}$  ( $[\text{M}+\text{Na}]^+$ ): calcd.: 1076.0342; found: 1076.0365.

**Elemental analysis:** For  $\text{C}_{39}\text{H}_{60}\text{Ge}_3\text{N}_3\text{O}_3\text{P}_7$ : Calcd.: C 44.47, H 5.74, N 3.99; found: C 44.51, H 5.83, N 4.07.



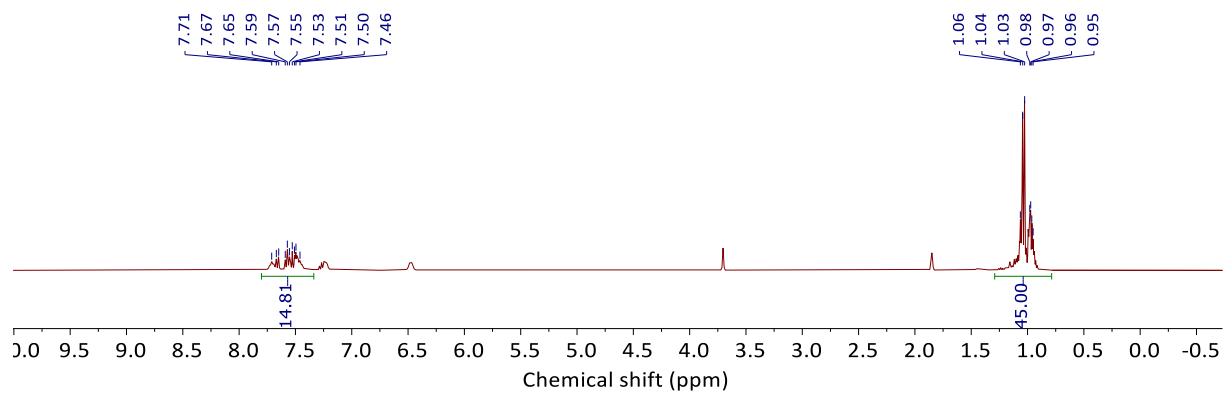

**Figure S20.**  $^1\text{H}$  NMR spectrum (THF- $d_8$ ) of **7**.

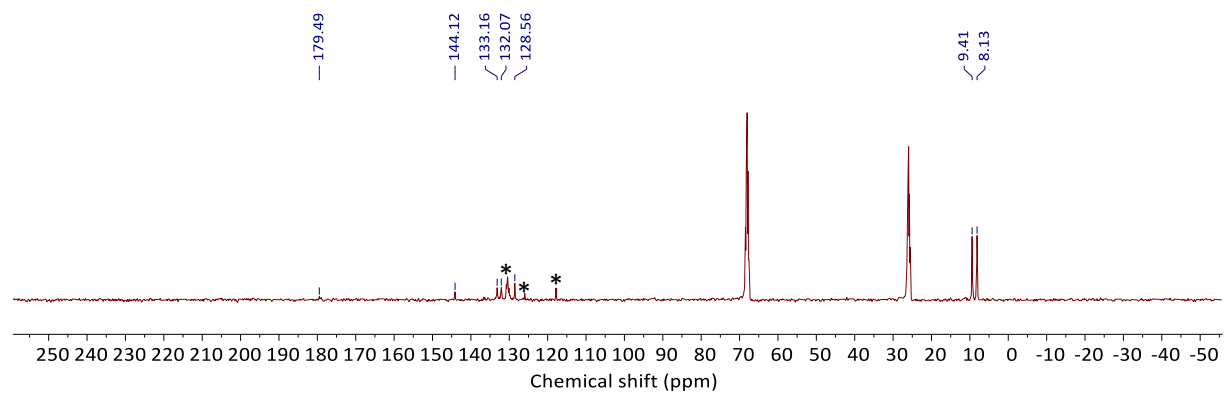

**Figure S21.**  $^{13}\text{C}\{^1\text{H}\}$  NMR spectrum (THF- $d_8$ ) of **7**, residual pyridine signals are marked with a \*.

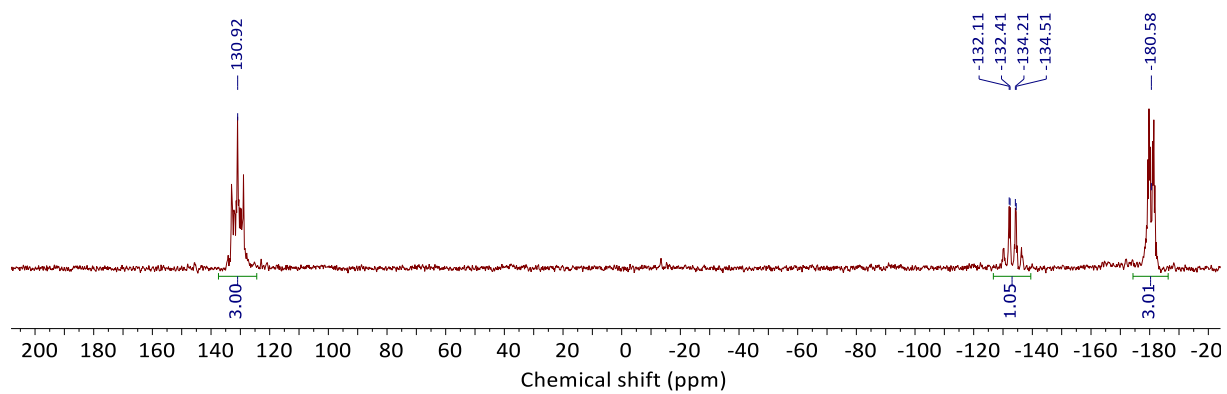

**Figure S22.**  $^{31}\text{P}$  NMR spectrum ( $\text{THF-d}_8$ ) of **7**.

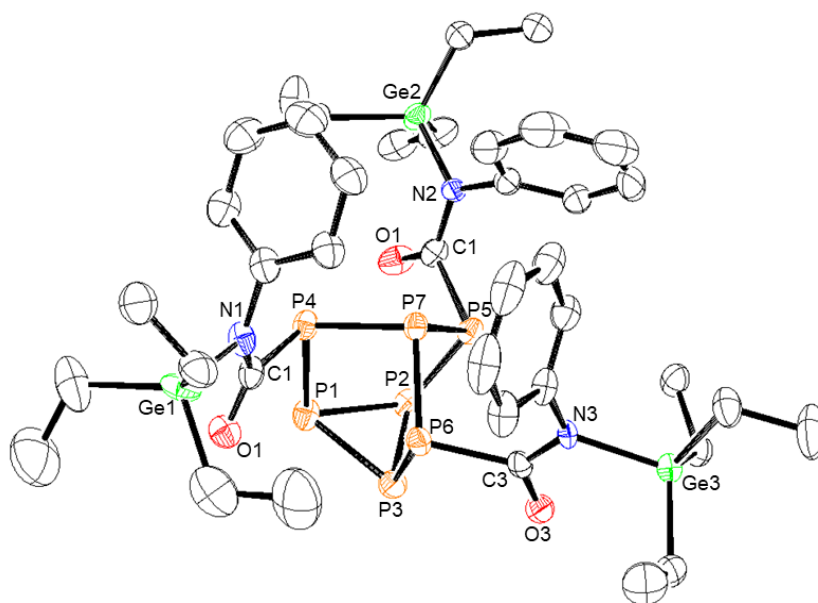

**Figure S23.** Molecular structure of **7**. Anisotropic displacement ellipsoids captured at 50% probability. Hydrogen atoms have been omitted for clarity. Phosphorus: orange; Nitrogen: blue; Oxygen: red; Germanium: green; Carbon: white.

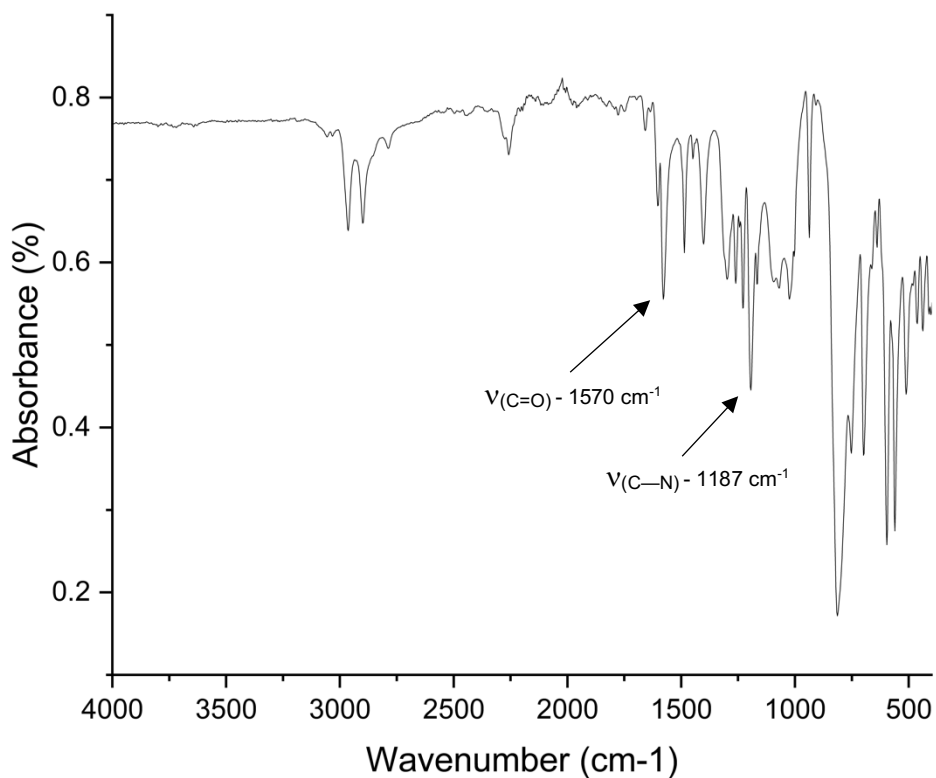

**Figure S24.** IR spectrum of **7**.

### 3.1.3. Synthesis of $(\text{Me}_3\text{Ge-TsNCO})_3\text{P}_7$ , **8**

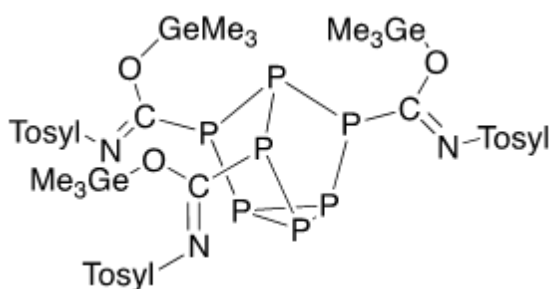

A Schlenk flask was loaded with a stir bar.  $(\text{Me}_3\text{Ge})_3\text{P}_7$  (150 mg, 0.26 mmol) and dissolved in toluene. To this solution, *p*-toluenesulfonyl isocyanate (155 mg, 0.79 mmol, 3 eq.) was added giving a yellow solution. The reaction was stirred for 4 days, no colour change was observed after this duration. The NMR spectrum of the reaction mixture revealed leftover starting material, however further consumption of starting material was not observed with prolonged reaction times and heating to 40 °C. Due to difficulties in separating the starting material from

the inserted product, the NMR spectra were assigned directly from the crude reaction mixture as washes with non-polar solvents did not affect the distribution of reaction components. Solvent was removed and the residue dissolved in pentane (2 mL). Crystals, suitable for X-ray diffraction analysis were grown through the slow evaporation of this solution.

**<sup>31</sup>P NMR Overall Conversion:** 81%

**<sup>31</sup>P NMR Isomeric conversion:** 44% symmetric (**A**), 37% asymmetric (**B**), 19% unreacted starting material.

**Yield after crystallisation:** 22 %

**<sup>1</sup>H NMR (400 MHz, 298 K, Toluene-d<sub>8</sub>):**  $\delta$  = 8.14 (d,  $^3J_{\text{HH}} = 8.2$  Hz, 1H, *Ar*), 8.11 (d,  $^3J_{\text{HH}} = 8.3$  Hz, 2H, *Ar*), 8.02 (d,  $^3J_{\text{HH}} = 6.5$  Hz, 1H, *Ar*), 7.97 (d,  $^3J_{\text{HH}} = 8.2$  Hz, 1H, *Ar*), 7.71 (d,  $^3J_{\text{HH}} = 8.4$  Hz, 2H, *Ar* unreacted tosyl isocyanate), 7.24 (overlapping doublets, 2H, *Ar*), 7.12 (d,  $^3J_{\text{HH}} = 7.7$  Hz, 3H, *Ar*), 7.04 (d,  $^3J_{\text{HH}} = 8.3$  Hz, 2H, *Ar*), 6.93 (d,  $^3J_{\text{HH}} = 8.2$  Hz, 2H, *Ar* unreacted tosyl isocyanate), 2.27 (s, 3H, *Me-Ar*), 2.15 (s, 2H, *Me-Ar*), 2.13 (overlapping singlets, 5H, *Me-Ar*), 2.10 (s, 4H, *Me-Ar* unreacted tosyl isocyanate), 0.64 (overlapping singlets, 9H, *Me<sub>3</sub>Ge*), 0.61 (s, 8H, *Me<sub>3</sub>Ge*), 0.50 (overlapping singlets, 11H, *Me<sub>3</sub>Ge*) ppm.

**<sup>13</sup>C{<sup>1</sup>H} NMR (101 MHz, 298 K, Toluene-d<sub>8</sub>):**  $\delta$  = 146.8 (s, *Ar* unreacted tosyl isocyanate), 140.8 - 140.4 (3 overlapping singlets, *Ar*), 138.3 (s, *Ar* unreacted tosyl isocyanate), 138.2 (s, *Ar*), 131.2 (s, *Ar* unreacted tosyl isocyanate), 130.6 - 130.4 (3 overlapping singlets, *Ar*), 130.2 (s, *Ar*), 129.4 (s, *Ar*) 128.3 - 128.1 (3 overlapping singlets, *Ar*), 127.9 (s, *Ar* unreacted tosyl isocyanate), 126.5 (s, *Ar*), 22.3 (s, *Me-Ar*), 22.3 (s, *Me-Ar*), 22.2 (s, *Me-Ar*, unreacted tosyl isocyanate), 22.2 (s, *Me-Ar*), 22.1 (s, *Me-Ar*), 5.3 (overlapping singlets, *Me<sub>3</sub>Ge B*), 5.0 (s, *Me<sub>3</sub>Ge A*), 3.5 (s, *Me<sub>3</sub>Ge SM*) ppm.

**<sup>31</sup>P NMR (162 MHz, 298 K, Toluene-d<sub>8</sub>):**  $\delta$  = 120.2 (q,  $^1J_{\text{PP}} = 383.5$  Hz, 5P, *Bridging B*), 103.4 (pseudo quartet, 6P, *Bridging A*), 8.2 - 4.2 (m, 3P, (*Me<sub>3</sub>Ge*)<sub>3</sub>*P*<sub>7</sub>), -11.9 (t,  $^1J_{\text{PP}} = 311.6$  Hz, 2P, *Bridging B*), -21.2 (t,  $^1J_{\text{PP}} = 312.8$  Hz, 2P, *Bridging B*), -91.7 - -97.7 (m, 1P, *Apical SM*), -104.9 (q,  $^1J_{\text{PP}} = 323.2$  Hz, 2P, *Apical B*), -115.1 (qq,  $^1J_{\text{PP}} = 377.2$  Hz,  $^2J_{\text{PP}} = 42.9$  Hz, 2P, *Apical A*), -147.2 - -153.7 (m, 5P, *Basal A*), -156.3 - -159.3 (m, 3P, *Basal SM*), -167.3 - -189.9 (overlapping multiplets, 9P, *Basal B*) ppm.

**Mass spectrometry (ESI pos/neg):** For C<sub>33</sub>H<sub>48</sub>Ge<sub>3</sub>N<sub>3</sub>O<sub>9</sub>S<sub>3</sub>P<sub>7</sub>+Na ([M+Na]<sup>+</sup>): Calcd.: 1187.8249; found: 1187.8259.

*Note: Some <sup>1</sup>H NMR integrations could not be definitively assigned due to the reaction mixture being inseparable from starting material, resulting in overlapping signals of different*

intensities. Starting material, along with both the symmetric and asymmetric isomers co-crystallised from the crude reaction mixture.

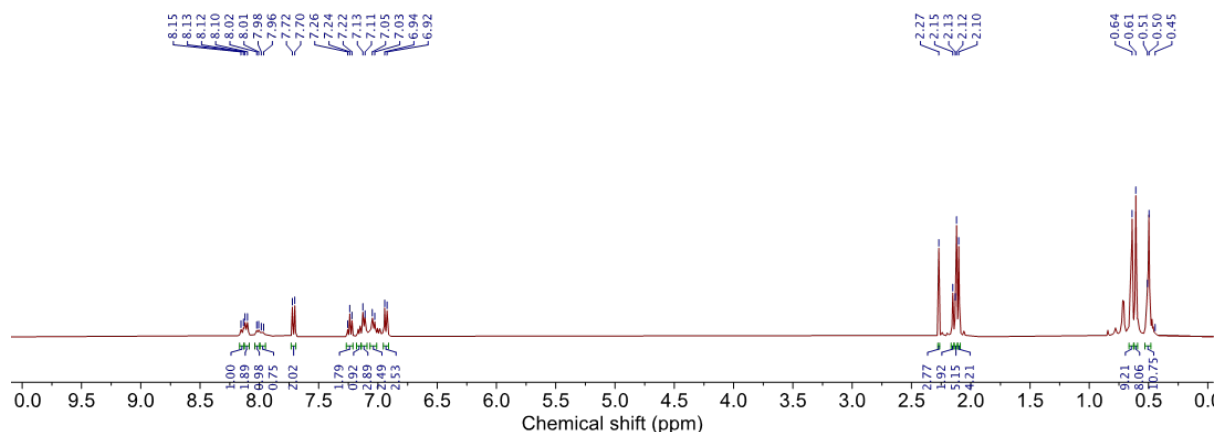

Figure S25.  $^1\text{H}$  NMR spectrum (Toluene- $d_8$ ) of **8**.

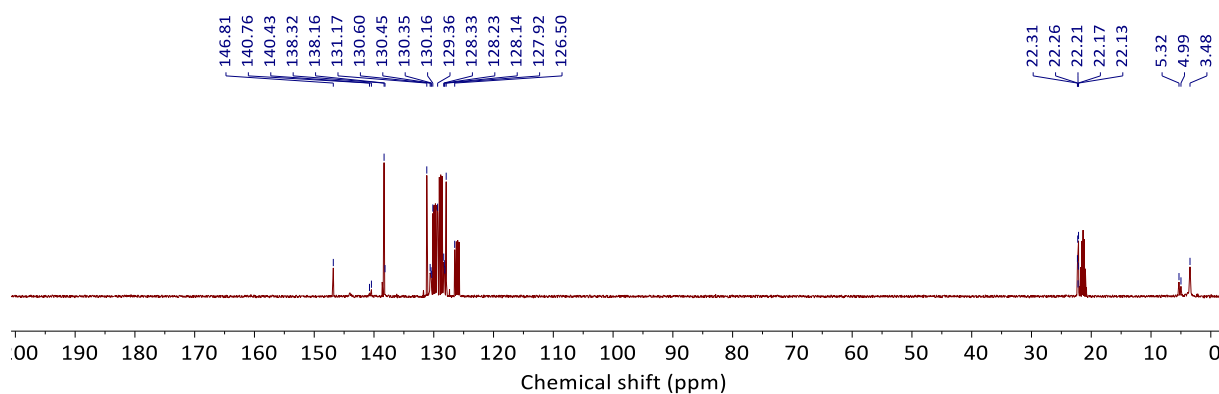

Figure S26.  $^{13}\text{C}\{^1\text{H}\}$  NMR spectrum (Toluene- $d_8$ ) of **8**.

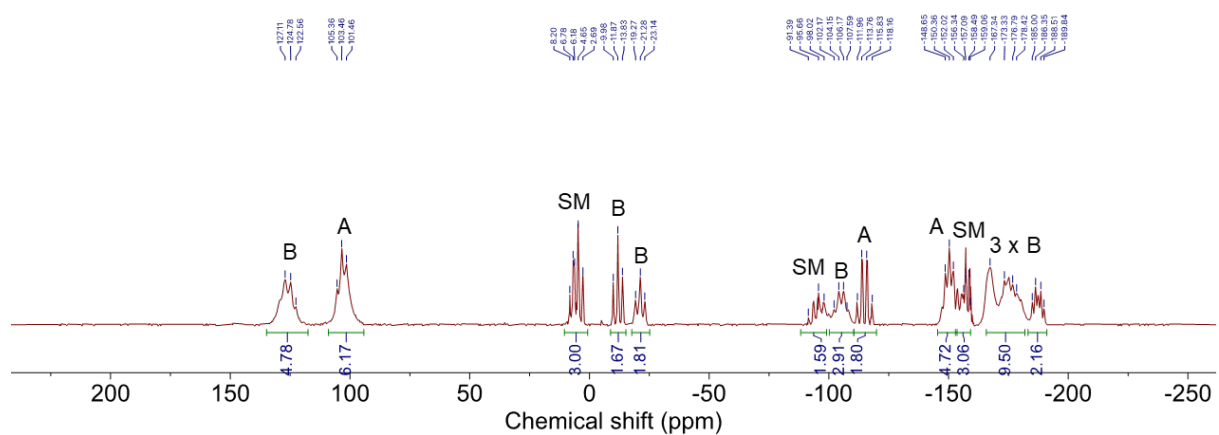

Figure S27.  $^{31}\text{P}$  NMR spectrum (Toluene- $d_8$ ) of **8**.

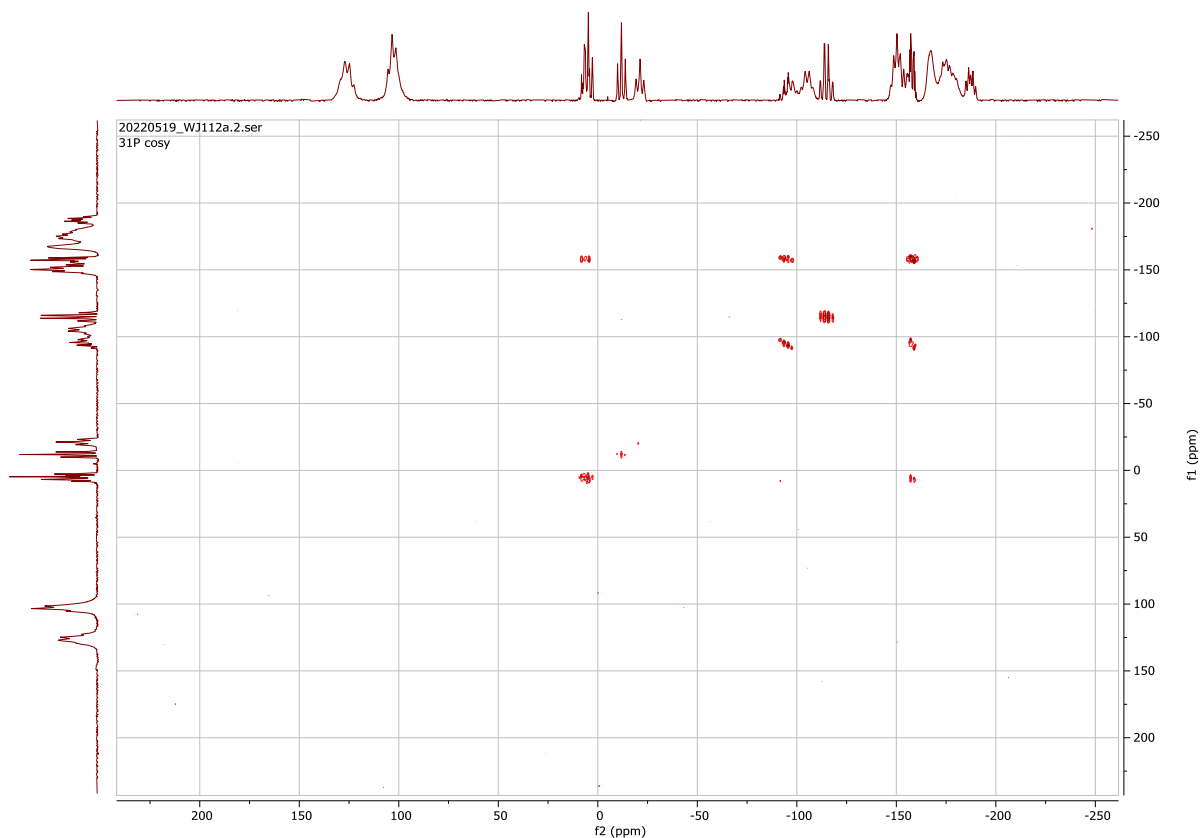

**Figure S28.**  $^{31}\text{P}$  COSY NMR (Toluene- $d_8$ ) spectrum of **8**.

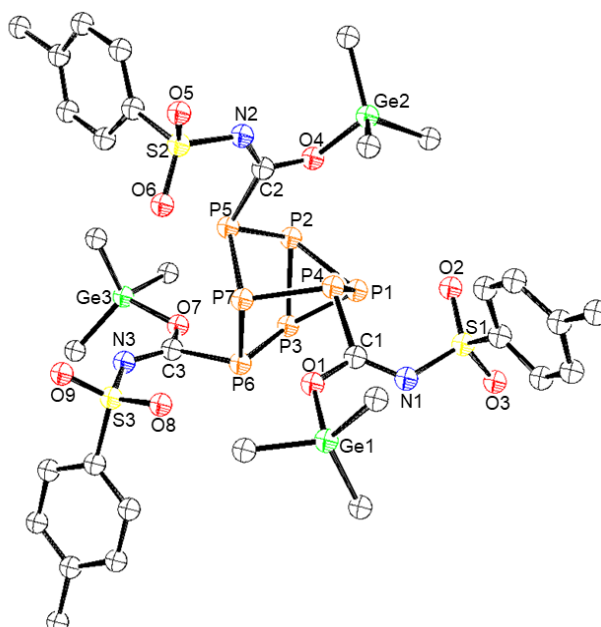

**Figure S29.** Molecular structure of **8**. Anisotropic displacement ellipsoids captured at 50% probability. Hydrogen atoms have been omitted for clarity. Phosphorus: orange; Nitrogen: blue; Oxygen: red; Germanium: green; Carbon: white.

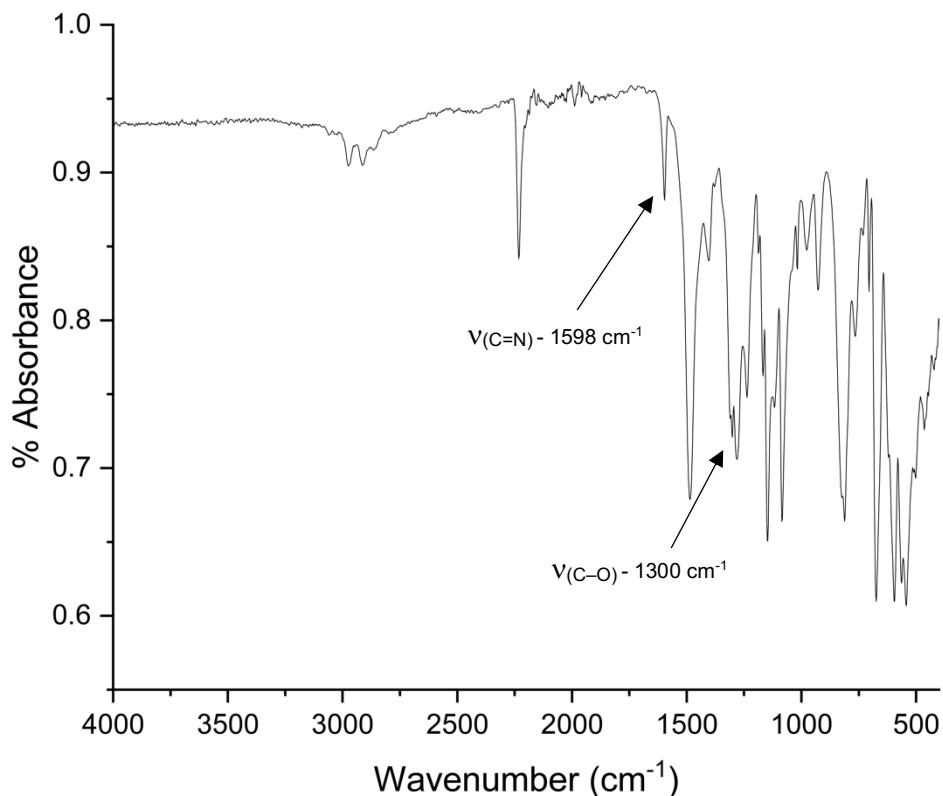

**Figure S30.** IR spectrum of **8**.

### 3.1.4. Synthesis of $(\text{Et}_3\text{Ge-TsNCO})_3\text{P}_7$ , **9**

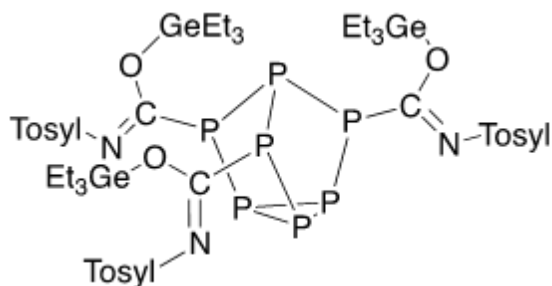

A flame dried Schlenk was loaded with a stir bar and  $(\text{Et}_3\text{Ge})_3\text{P}_7$  (200 mg, 0.29 mmol), dissolved in toluene (5 mL) was added. To this solution, *p*-toluenesulfonyl isocyanate (170 mg, 0.87 mmol) was added dropwise while stirring. This gave a light yellow/green solution which did not change appearance over the course of the reaction. The reaction was stirred for 4 days. Even after these long reaction times, NMR spectroscopy showed residual starting material. Therefore, conversions are quoted as *in situ* values determined from  $^{31}\text{P}$  NMR spectroscopy. The solvent was removed to give a green waxy solid, which was dissolved in ether and left to slowly evaporate, yielding large block shaped crystals. Due to similarities in solubility, the inserted products were difficult to separate from the starting material and washes

with non-polar solvents such as ether and pentane did not affect the product to starting material distribution.

**<sup>31</sup>P NMR Overall Conversion: 55%**

**<sup>31</sup>P NMR Isomeric conversion:** Symmetric: 34% (**A**), asymmetric: 21% (**B**), 45% unreacted starting material.

**Yield after crystallisation: 17%**

**<sup>1</sup>H NMR (400 MHz, 298 K, Toluene-d<sub>8</sub>):**  $\delta$  = 8.03 (d, <sup>3</sup>J<sub>HH</sub> = 8.3 Hz, 6H, Ar), 8.00 (d, <sup>3</sup>J<sub>HH</sub> = 8.3 Hz, 1H Ar), 7.92 (d, <sup>3</sup>J<sub>HH</sub> = 8.3 Hz, 2H Ar), 7.87 (d, <sup>3</sup>J<sub>HH</sub> = 8.4 Hz, 3H, Ar), 7.51 (d, <sup>3</sup>J<sub>HH</sub> = 8.5 Hz, 8H Ar unreacted tosyl isocyanate), 7.08 - 7.03 (m, 1H Ar), 6.97-6.78 (m, 12H, Ar), 6.68 (d, <sup>3</sup>J<sub>HH</sub> = 8.3 Hz, 8H Ar unreacted tosyl isocyanate), 2.12 (s, 2H, Me-Ar), 1.99 (s, 3 H, Me-Ar), 1.97 (s, 4H, Me-Ar B), 1.93 (s, 3H, Me-Ar), 1.92 (s, 13H, Me-Ar unreacted tosyl isocyanate), 1.17 - 0.88 (m, 146H, Et<sub>3</sub>Ge of product A and B, and of (Et<sub>3</sub>Ge)<sub>3</sub>P<sub>7</sub>) ppm.

**<sup>13</sup>C{<sup>1</sup>H} NMR (101 MHz, 298 K, Toluene-d<sub>8</sub>):**  $\delta$  = 146.1 (s, Ar unreacted tosyl isocyanate), 143.3 (s, Ar), 143.1 (s, Ar), 140.7 (s, Ar), 140.5 (s, Ar), 140.2 (s, Ar), 140.1 (s, Ar) 137.9 (s, Ar unreacted tosyl isocyanate), 131.3 (s, Ar), 130.6 (s, Ar), 129.8 (s, Ar), 129.7 (s, Ar B), 128.9 (s, Ar unreacted tosyl isocyanate), 127.8 (s, Ar) 127.4 (s, Ar unreacted tosyl isocyanate), 127.0 (s, Ar), 126.0 (s, Ar), 22.8 (s, Me-Ar), 21.7 (s, Me-Ar unreacted tosyl isocyanate), 21.6 (s, Me-Ar), 21.6 (s, Me-Ar), 21.5 (s, Me-Ar), 10.4 (overlapping singlets, Et<sub>3</sub>Ge B), 10.3 (overlapping singlets, Et<sub>3</sub>Ge), 9.6 (s, Et<sub>3</sub>Ge), 9.5 (overlapping singlets, Et<sub>3</sub>Ge), 9.6 (s, Et<sub>3</sub>Ge), 8.6 (overlapping singlets, Et<sub>3</sub>Ge), 8.5 (overlapping singlets, Et<sub>3</sub>Ge) ppm

**<sup>31</sup>P NMR (168 MHz, 298 K, Toluene-d<sub>8</sub>):**  $\delta$  = 122.2 (q, 3P, bridging A), 100.3 (q, 1P, bridging B), -2.8 - -13.0 (m, 3P, bridging SM), -21.8 (t, 1P, bridging B), -30.0 (t, 1P, bridging B), -101.8 (qq, 1P, apical SM), -111.1 (qq, 1P, apical A), -119.2 (qq, 1P, apical B), -148.6 - -153.9 (m, 1P, basal B), -154.6 - -159.8 (m, 3P, basal SM), -162.1 - -166.3 (m, 1P, basal B), -174.7 - -183.2 (m, 3P, basal A), -188.3 - -195.7 (m, 1P, basal B) ppm.

*Note: Multiple attempts at mass spectrometry were made but significant decomposition was seen upon ionisation. Starting material, along with both the symmetric and asymmetric isomers co-crystallised from the crude reaction mixture.*





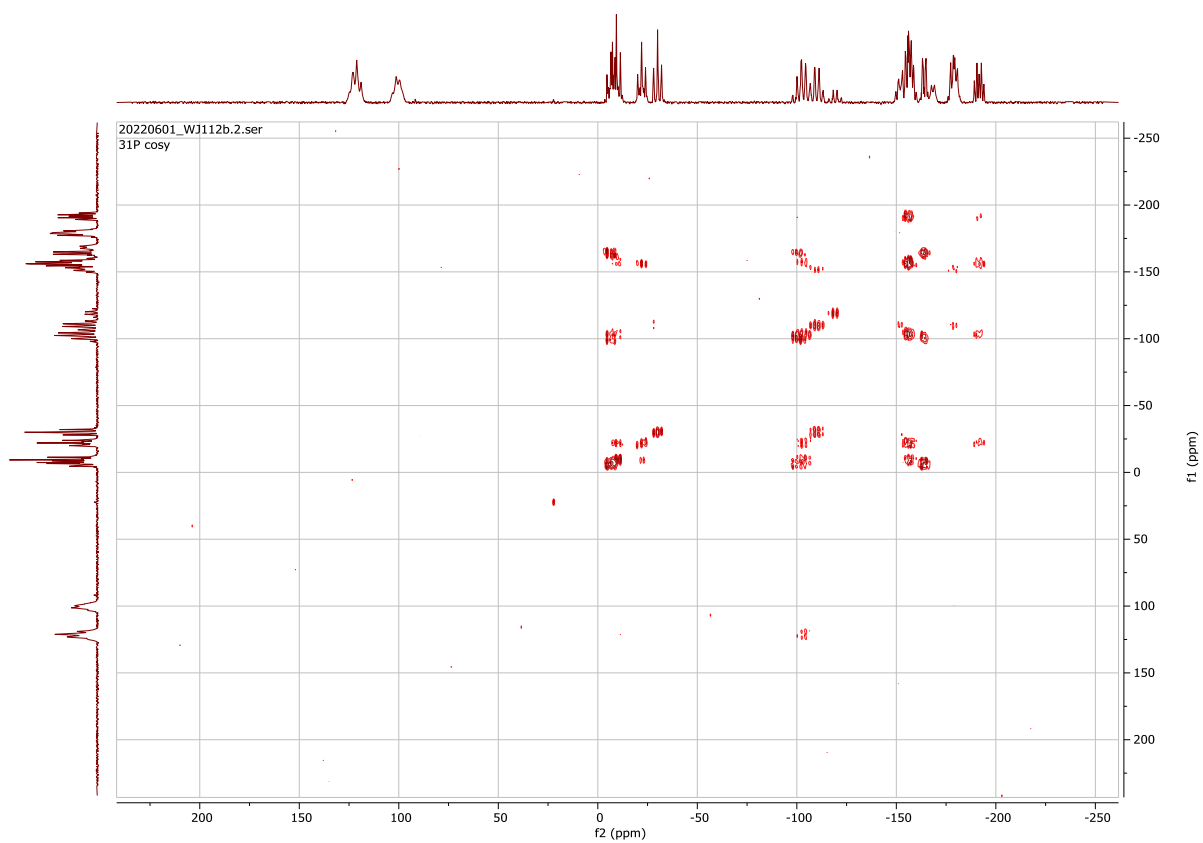

**Figure S34.**  $^{31}\text{P}$  COSY NMR spectrum (Toluene- $d_8$ ) of **9**.

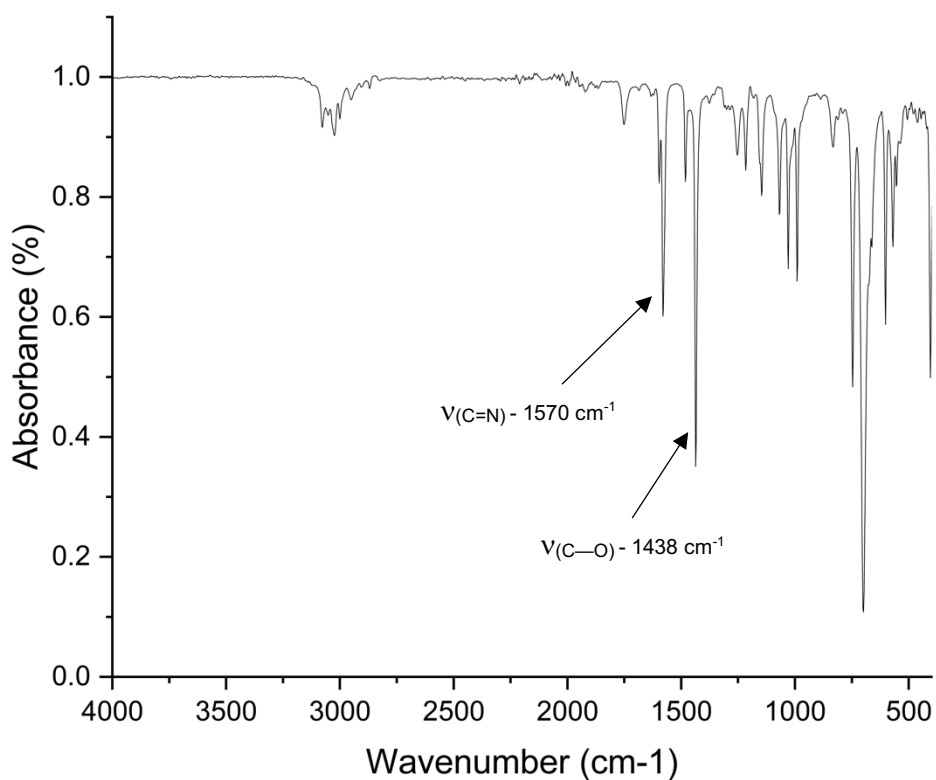

**Figure S35.** IR spectrum of **9**.

### 3.1.5. Synthesis of $({}^n\text{Bu}_3\text{Sn-TsNCO})_3\text{P}_7$ , **10**

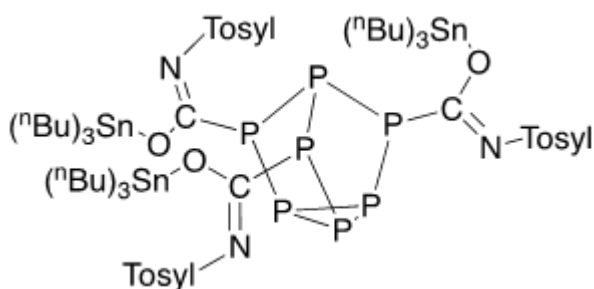

A Schlenk flask was loaded with a stir bar.  $({}^n\text{Bu}_3\text{Sn})_3\text{P}_7$  (100 mg, 0.092 mmol), was dissolved in toluene (3 mL) and added to the Schlenk. In a separate vial, *p*-toluenesulfonyl isocyanate (54 mg, 0.27 mmol) was dissolved in toluene (3 mL). The *p*-toluenesulfonyl isocyanate solution was added dropwise while stirring rapidly. Once addition was complete, a dark yellow solution was observed. The reaction was stirred for 4 days, by which point, no colour change was observed. NMR spectrum of the reaction mixture revealed left over starting material, however, complete consumption was not possible, even with prolonged reaction times and heating to

40 °C. Due to similarities in solubility, the inserted products were difficult to separate from the starting material. Therefore conversions are quoted as *in situ* values.

**<sup>31</sup>P NMR overall conversion:** 45%

**<sup>31</sup>P NMR Isomeric conversion:** 26% symmetric (**A**); 19% asymmetric (**B**); 55% unreacted starting material

**<sup>1</sup>H NMR (400 MHz, 298 K, THF-d<sub>8</sub>):** δ = 7.49 (d, <sup>3</sup>J<sub>HH</sub> = 8.3 Hz, 1H, Ar), 7.45 (d, <sup>3</sup>J<sub>HH</sub> = 7.4 Hz, 2H, Ar unreacted tosyl isocyanate), 7.40 (d, <sup>3</sup>J<sub>HH</sub> = 8.4 Hz, 1H, Ar), 7.35 (d, <sup>3</sup>J<sub>HH</sub> = 8.3 Hz, 1H, Ar), 7.23 (d, <sup>3</sup>J<sub>HH</sub> = 8.1 Hz, 2H, Ar), 7.01 (d, <sup>3</sup>J<sub>HH</sub> = 8.3 Hz, 2H, Ar unreacted tosyl isocyanate), 6.90 - 6.78 (m, 5H, Ar), 2.00 (s, 3H, Me-Ar unreacted tosyl isocyanate), 1.98 - 1.88 (m, 8H, Me-Ar), 1.27 - 1.10 (m, 24H, <sup>n</sup>Bu), 0.92 - 0.87 (m, 26H, <sup>n</sup>Bu), 0.83 - 0.65 (m, 20H, <sup>n</sup>Bu), 0.60 - 0.56 (m, 11H, <sup>n</sup>Bu), 0.47 (t <sup>3</sup>J<sub>HH</sub> = 7.3 Hz, 27H, <sup>n</sup>Bu) ppm.

**<sup>13</sup>C{<sup>1</sup>H} NMR (101 MHz, 298 K, THF-d<sub>8</sub>):** δ = 156.1 (s, Ar unreacted tosyl isocyanate), 147.9 (s, Ar unreacted tosyl isocyanate), 145.8 (s, Ar), 144.1 (s, Ar), 139.2 (s, Ar), 131.9 (s, Ar unreacted tosyl isocyanate), 131.3 (s, Ar), 130.9 (s, Ar unreacted tosyl isocyanate), 130.6 (s, Ar), 130.0 (s, Ar), 128.8 (s, Ar), 127.9 (s, Ar), 31.3 (s, Me-Ar), 29.7 (s, Me-Ar), 29.3 (s, Me-Ar), 29.0 (s, Me-Ar unreacted tosyl isocyanate), 28.7 (s, Me-Ar), 22.5 - 22.3 (overlapping singlets, <sup>n</sup>Bu), 19.9 (s, <sup>n</sup>Bu), 19.4 (s, <sup>n</sup>Bu), 16.5 (s, <sup>n</sup>Bu), 15.0 - 14.8 (overlapping singlets, <sup>n</sup>Bu) ppm.

**<sup>31</sup>P NMR (168 MHz, 298 K, THF-d<sub>8</sub>):** δ = 132.4 (t, <sup>1</sup>J<sub>PP</sub> = 340.8 Hz, 1P, Bridging B), 125.6 (t, <sup>1</sup>J<sub>PP</sub> = 352.0 Hz, 3P, Bridging A), 105.47 (t, <sup>1</sup>J<sub>PP</sub> = 339.6 Hz, 1P, Bridging B), -17.0 - -25.4 (m, 3P, Bridging SM), -46.2 (t, <sup>1</sup>J<sub>PP</sub> = 312.8 Hz, 1P, Bridging B), -56.2 (t, <sup>1</sup>J<sub>PP</sub> = 311.0 Hz, 1P, Apical B), -92.0 (qq, <sup>1</sup>J<sub>PP</sub> = 303.2 Hz, <sup>3</sup>J<sub>PP</sub> = 49.8 Hz, 1P, Apical SM), -95.6 - -102.9 (m, 1P, Apical A), -151.6 - -160.5 (m, 3P, Basal A), -163.8 - -170.1 (m, 3P, Basal SM), -175.2 - -204.7 (m, 3P, Basal B) ppm.

**<sup>119</sup>Sn NMR (149 MHz, 298 K, THF-d<sub>8</sub>):** δ = 106.8 (s, <sup>n</sup>Bu<sub>3</sub>Sn), 72.9 (s, <sup>n</sup>Bu<sub>3</sub>Sn), 18.9 (d, <sup>1</sup>J<sub>SnP</sub> = 777.5 Hz, (<sup>n</sup>Bu<sub>3</sub>Sn)<sub>3</sub>P<sub>7</sub>) ppm.

*Note: Multiple attempts at mass spectrometry were made but significant decomposition was seen upon ionisation.*

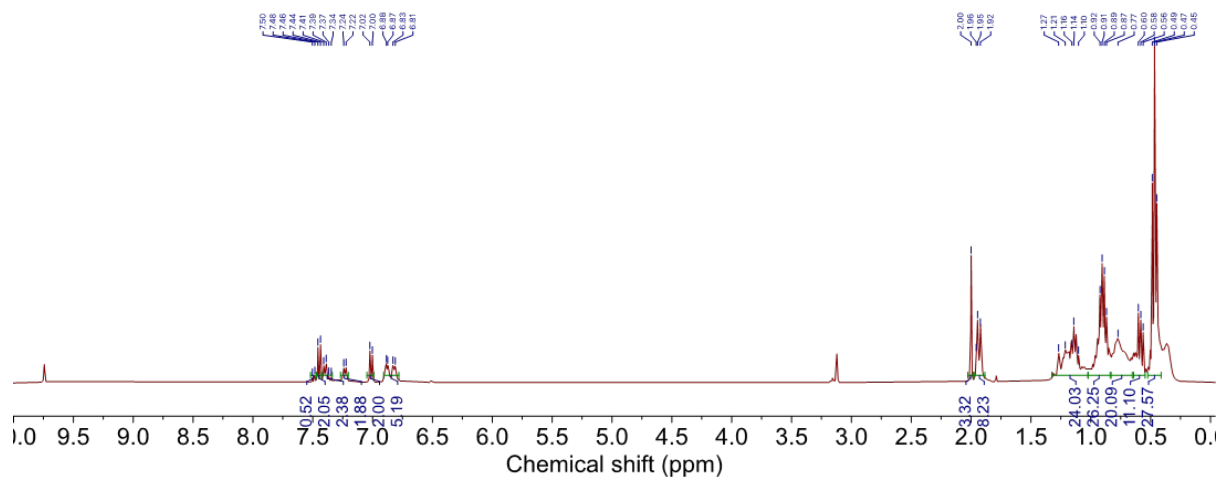

**Figure S36.**  $^1\text{H}$  NMR spectrum (THF- $d_8$ ) of **10**.

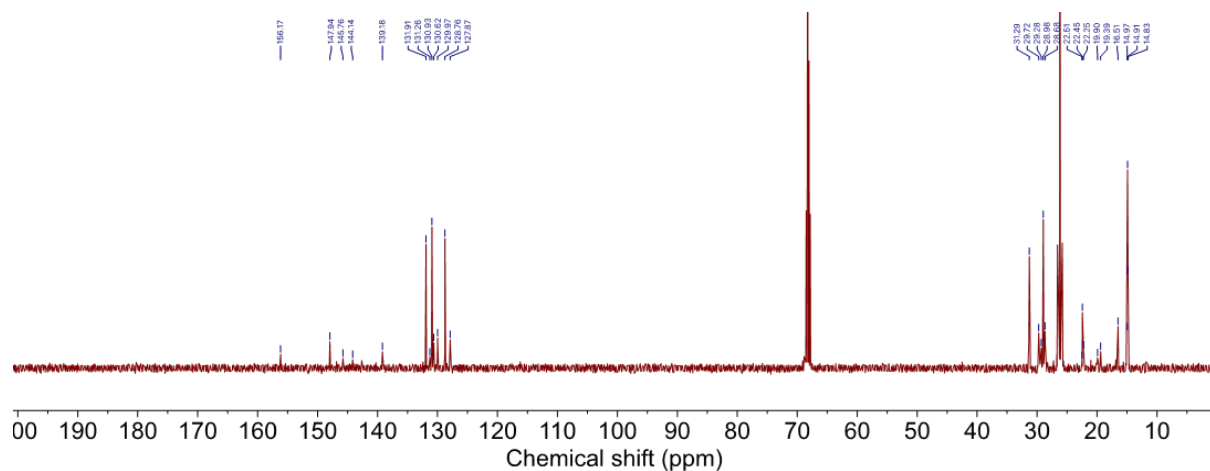

**Figure S37.**  $^{13}\text{C}\{^1\text{H}\}$  NMR spectrum (THF- $d_8$ ) of **10**.

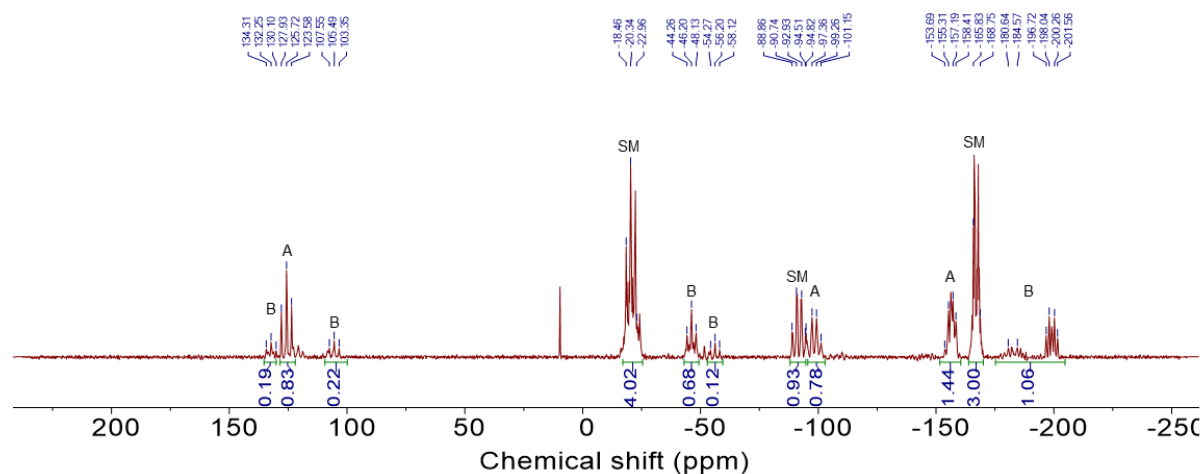

**Figure S38.**  $^{31}\text{P}$  NMR spectrum (THF- $d_8$ ) of **10**.

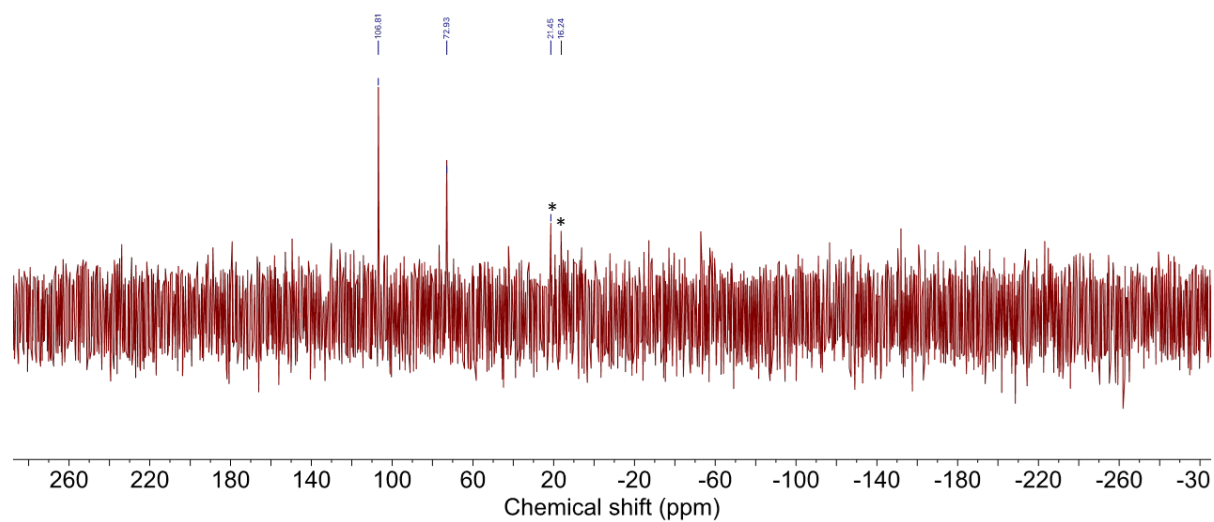

**Figure S39.**  $^{119}\text{Sn}$  NMR spectrum (THF- $d_8$ ) of **10**. Unreacted  $(n\text{Bu}_3\text{Sn})_3\text{P}_7$  is marked with a \*.

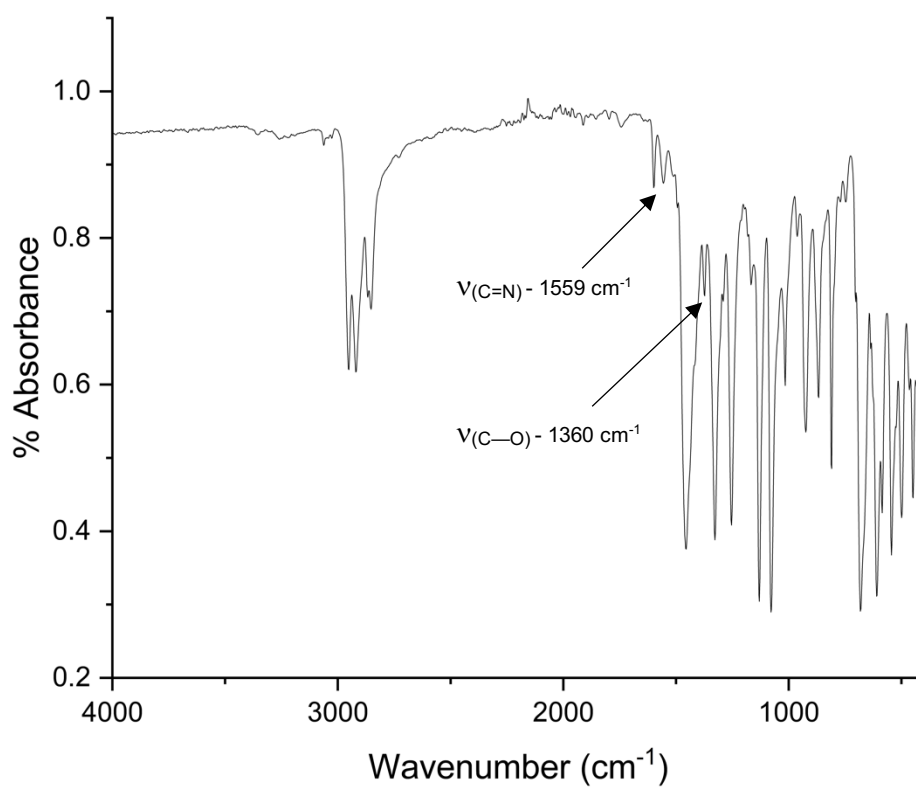

**Figure S40.** IR spectrum of **10**.

### 3.1.6. Synthesis of $(\text{TMS-TsNCO})_3\text{As}_7$ , 11

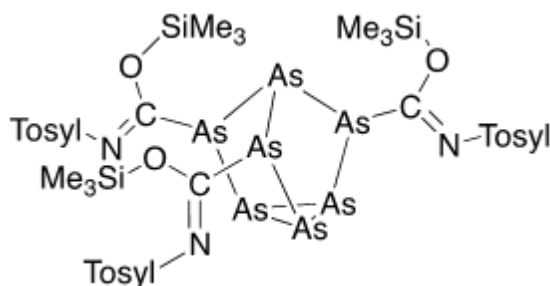

A Schlenk flask was loaded with a stir bar,  $(\text{Me}_3\text{Si})_3\text{As}_7$  (100 mg, 0.134 mmol) was dissolved in THF (3 mL). To this solution, *p*-toluenesulfonyl isocyanate (79 mg, 0.40 mmol) was added affording a deep red solution. The reaction was allowed to stir for 1 week, the solvent was then removed under reduced pressure to give a red oil. The residue was dissolved in  $\text{Et}_2\text{O}$  (2 mL). The resulting solution was left to slowly evaporate, yielding orange needle shaped crystals. The crystals were washed with pentane (3 x 1 mL), affording an orange powder. Crystals suitable for X-ray diffraction analysis were grown through the slow evaporation of an  $\text{Et}_2\text{O}$  solution of the product.

**Isolated yield:** 85 mg, 47%

**$^1\text{H}$  NMR (400 MHz, 298 K, THF- $d_8$ ):**  $\delta$  = 7.75 (d,  $^3J_{\text{HH}}$  = 8.3 Hz, 6H, Ar), 7.28 (d,  $^3J_{\text{HH}}$  = 7.9 Hz, 6H, Ar), 2.33 (s, 9H, Me), 0.26 (s, 27H,  $(\text{Me}_3\text{Si-TsNCO})_3\text{As}_7$ ) ppm.

**$^{13}\text{C}\{^1\text{H}\}$  NMR (101 MHz, 298 K, THF- $d_8$ ):**  $\delta$  = 185.9 (s,  $(\text{Me}_3\text{Si-TsNCO})_3\text{As}_7$ ), 145.1 (s, Ar), 140.1 (s, Ar), 131.0 (s, Ar), 128.6 (s, Ar), 22.1 (s, Me), 0.3 (s,  $(\text{Me}_3\text{Si-TsNCO})_3\text{As}_7$ ) ppm.

**$^{29}\text{Si}$  DEPT90 NMR (79 MHz, 298 K, THF- $d_8$ ):**  $\delta$  = 31.12 (s,  $\text{Me}_3\text{Si-O}$ ) ppm.

**Elemental analysis:** For  $\text{C}_{33}\text{H}_{48}\text{As}_7\text{N}_3\text{O}_9\text{S}_3\text{Si}_3$ : Calcd.: C 29.68, H 3.62, N 3.15, S 7.20; found: C 29.73, H 3.66, N 3.25, S 7.11.

*Note: Multiple attempts at mass spectrometry were made but significant decomposition was seen upon ionisation.*

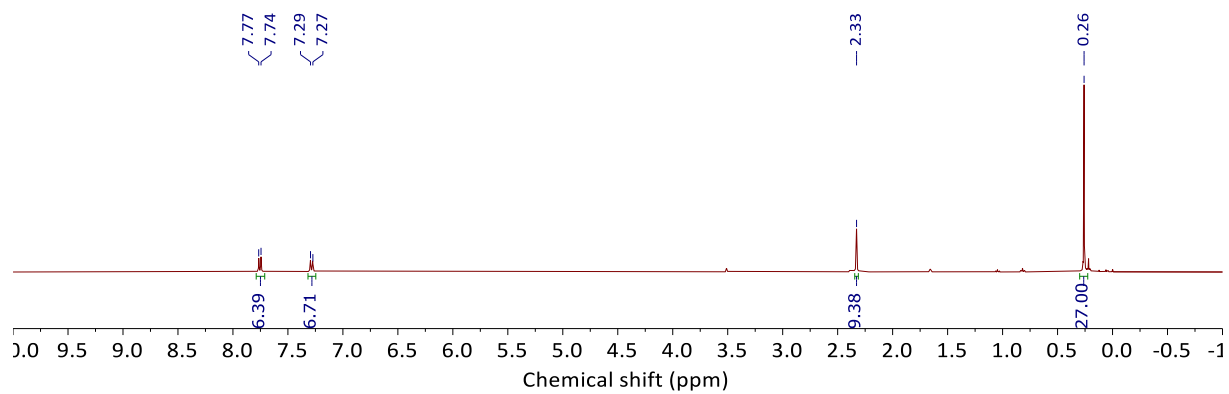

**Figure S41.**  $^1\text{H}$  NMR spectrum (THF- $d_8$ ) of **11**.

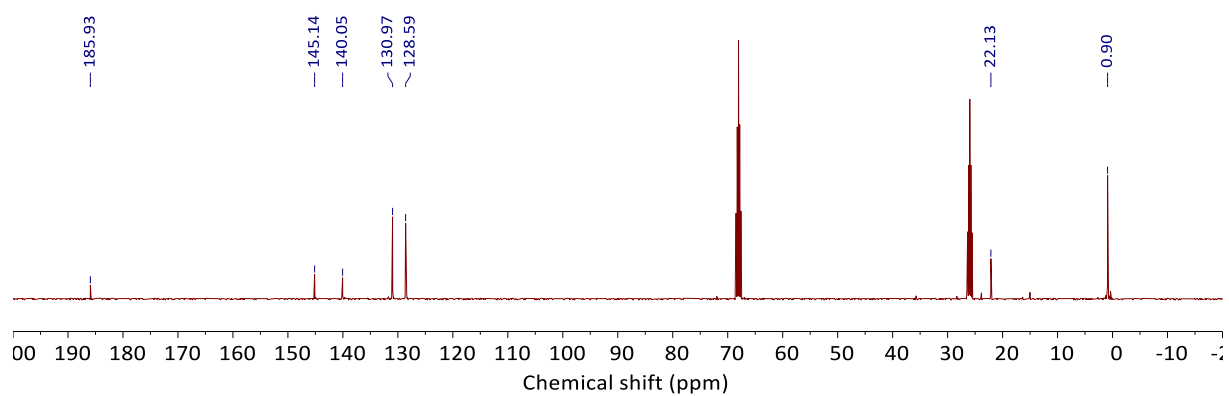

**Figure S42.**  $^{13}\text{C}\{^1\text{H}\}$  NMR spectrum (THF- $d_8$ ) of **11**.

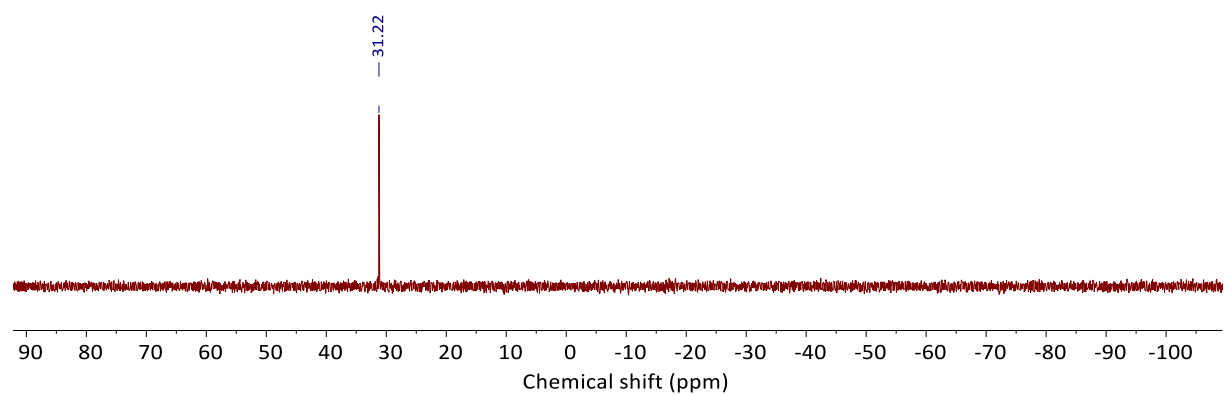

**Figure S43.**  $^{29}\text{Si}$  DEPT90 NMR spectrum (THF- $d_8$ ) of **11**.



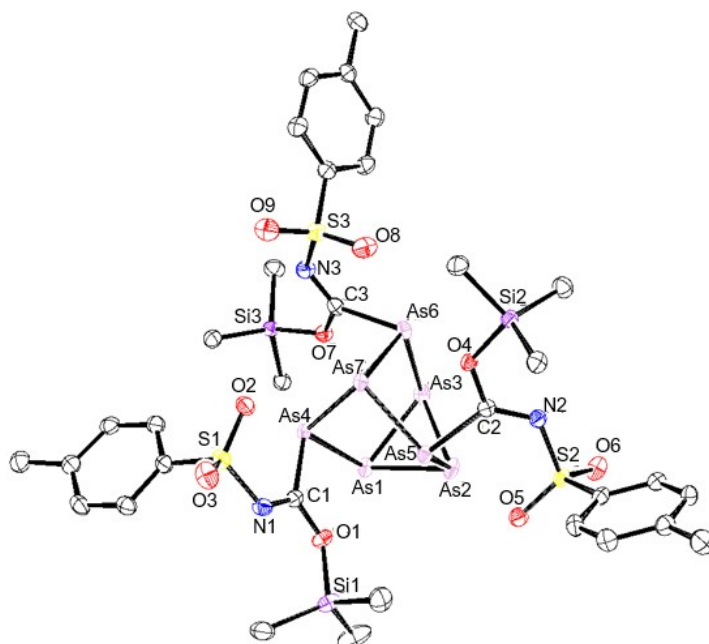

**Figure S44.** Molecular structure of **11**. Anisotropic displacement ellipsoids captured at 50% probability. Hydrogen atoms have been omitted for clarity. Arsenic: plum; Nitrogen: blue; Oxygen: red; Silicon: purple; Carbon: white.

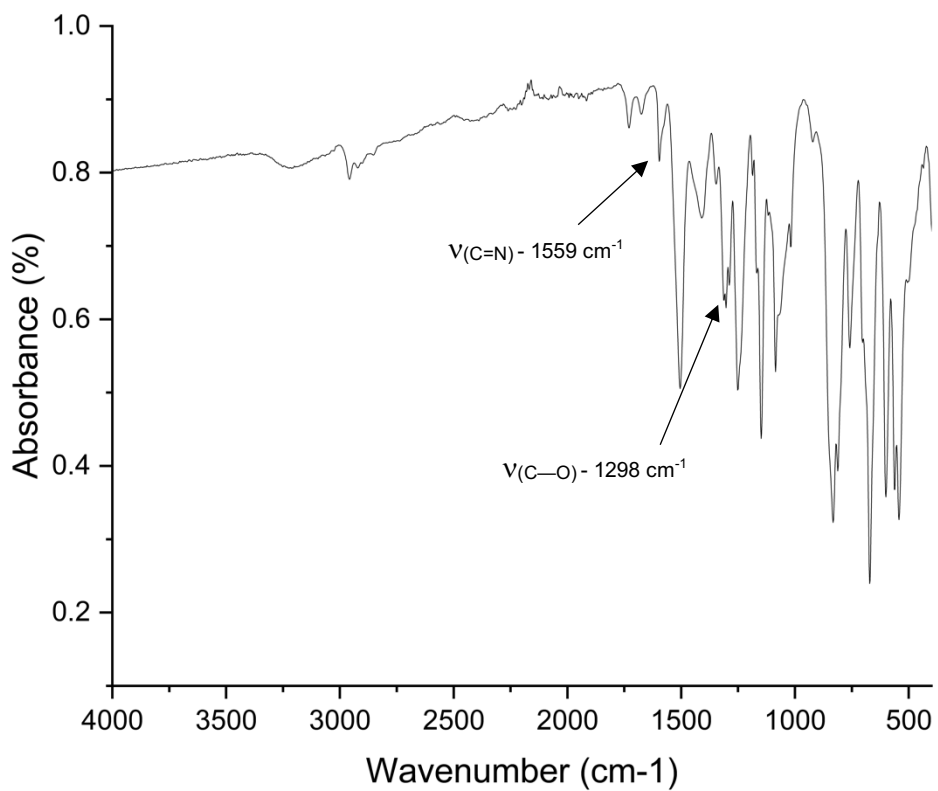

**Figure S45.** IR spectrum of **11**.

#### 4. IR data

**Table S1.** Comparison of observed IR wavenumber against computationally calculated wavenumber, calculated at the pbe1pbe 6-311G(d,p) level of theory for compound **6**.

| <b>(Me<sub>3</sub>Ge-PhNCO)<sub>3</sub>P<sub>7</sub> - OOO binding</b>            |                                                    |                                                  |
|-----------------------------------------------------------------------------------|----------------------------------------------------|--------------------------------------------------|
| <b>Bond vibration</b>                                                             | <b>Calculated wavenumber /<br/>cm<sup>-1</sup></b> | <b>Observed wavenumber /<br/>cm<sup>-1</sup></b> |
| <b>C=N</b>                                                                        | 1710                                               | -                                                |
| <b>C—O</b>                                                                        | 1342                                               | -                                                |
| <b>(Me<sub>3</sub>Ge-PhNCO)<sub>3</sub>P<sub>7</sub> - NNN binding (expected)</b> |                                                    |                                                  |
| <b>C—N</b>                                                                        | 1366                                               | 1376                                             |
| <b>C=O</b>                                                                        | 1709                                               | 1601                                             |

**Table S2.** Comparison of observed IR wavenumber against computationally calculated wavenumber, calculated at the pbe1pbe 6-311G(d,p) level of theory for compound **7**.

| <b>(Et<sub>3</sub>Ge-PhNCO)<sub>3</sub>P<sub>7</sub> - OOO binding</b>            |                                                    |                                                  |
|-----------------------------------------------------------------------------------|----------------------------------------------------|--------------------------------------------------|
| <b>Bond vibration</b>                                                             | <b>Calculated wavenumber /<br/>cm<sup>-1</sup></b> | <b>Observed wavenumber /<br/>cm<sup>-1</sup></b> |
| <b>C=N</b>                                                                        | 1704                                               | -                                                |
| <b>C—O</b>                                                                        | 1328                                               | -                                                |
| <b>(Et<sub>3</sub>Ge-PhNCO)<sub>3</sub>P<sub>7</sub> - NNN binding (expected)</b> |                                                    |                                                  |
| <b>C—N</b>                                                                        | 1228                                               | 1187                                             |
| <b>C=O</b>                                                                        | 1705                                               | 1570                                             |

**Table S3.** Comparison of observed IR wavenumber against computationally calculated wavenumber, calculated at the pbe1pbe 6-311G(d,p) level of theory for compound **8**.

| <b>(Me<sub>3</sub>Ge-TsNCO)<sub>3</sub>P<sub>7</sub> - OOO binding (expected)</b> |                                                    |                                                  |
|-----------------------------------------------------------------------------------|----------------------------------------------------|--------------------------------------------------|
| <b>Bond vibration</b>                                                             | <b>Calculated wavenumber /<br/>cm<sup>-1</sup></b> | <b>Observed wavenumber /<br/>cm<sup>-1</sup></b> |
| <b>C=N</b>                                                                        | 1580                                               | 1598                                             |
| <b>C—O</b>                                                                        | 1343                                               | 1300                                             |
| <b>(Me<sub>3</sub>Ge-TsNCO)<sub>3</sub>P<sub>7</sub> - NNN binding</b>            |                                                    |                                                  |
| <b>C—N</b>                                                                        | 1202                                               | -                                                |
| <b>C=O</b>                                                                        | 1736                                               | -                                                |

**Table S4.** Comparison of observed IR wavenumber against computationally calculated wavenumber, calculated at the pbe1pbe 6-311G(d,p) level of theory for compound **9**.

| <b>(Et<sub>3</sub>Ge-TsNCO)<sub>3</sub>P<sub>7</sub> - OOO binding (expected)</b> |                                                    |                                                  |
|-----------------------------------------------------------------------------------|----------------------------------------------------|--------------------------------------------------|
| <b>Bond vibration</b>                                                             | <b>Calculated wavenumber /<br/>cm<sup>-1</sup></b> | <b>Observed wavenumber /<br/>cm<sup>-1</sup></b> |
| <b>C=N</b>                                                                        | 1569                                               | 1570                                             |
| <b>C—O</b>                                                                        | 1438                                               | 1340                                             |
| <b>(Et<sub>3</sub>Ge-TsNCO)<sub>3</sub>P<sub>7</sub> - NNN binding</b>            |                                                    |                                                  |
| <b>C—N</b>                                                                        | 1221                                               | -                                                |
| <b>C=O</b>                                                                        | 1736                                               | -                                                |

**Table S5.** Comparison of observed IR wavenumber against computationally calculated wavenumber, calculated at the pbe1pbe 6-311G(d,p) level of theory for compound **10**.

| <b>(<sup>n</sup>Bu<sub>3</sub>Sn-TsNCO)<sub>3</sub>P<sub>7</sub> - OOO binding (expected)</b> |                                                    |                                                  |
|-----------------------------------------------------------------------------------------------|----------------------------------------------------|--------------------------------------------------|
| <b>Bond vibration</b>                                                                         | <b>Calculated wavenumber /<br/>cm<sup>-1</sup></b> | <b>Observed wavenumber /<br/>cm<sup>-1</sup></b> |
| <b>C=N</b>                                                                                    | 1540                                               | 1559                                             |
| <b>C—O</b>                                                                                    | 1343                                               | 1360                                             |
| <b>(<sup>n</sup>Bu<sub>3</sub>Sn-TsNCO)<sub>3</sub>P<sub>7</sub> - NNN binding</b>            |                                                    |                                                  |
| <b>C—N</b>                                                                                    | 1258                                               | -                                                |
| <b>C=O</b>                                                                                    | 1658                                               | -                                                |

**Table S6.** Comparison of observed IR wavenumber against computationally calculated wavenumber, calculated at the pbe1pbe 6-311G(d,p) level of theory for compound **11**.

| <b>(Me<sub>3</sub>Si-TsNCO)<sub>3</sub>P<sub>7</sub> - OOO binding (expected)</b> |                                                    |                                                  |
|-----------------------------------------------------------------------------------|----------------------------------------------------|--------------------------------------------------|
| <b>Bond vibration</b>                                                             | <b>Calculated wavenumber /<br/>cm<sup>-1</sup></b> | <b>Observed wavenumber /<br/>cm<sup>-1</sup></b> |
| <b>C=N</b>                                                                        | 1587                                               | 1587                                             |
| <b>C—O</b>                                                                        | 1293                                               | 1298                                             |
| <b>(Me<sub>3</sub>Si-TsNCO)<sub>3</sub>P<sub>7</sub> - NNN binding</b>            |                                                    |                                                  |
| <b>C—N</b>                                                                        | 1174                                               | -                                                |
| <b>C=O</b>                                                                        | 1717                                               | -                                                |

**Table S7.** Comparison of observed IR wavenumber against computationally calculated wavenumber, calculated at the pbe1pbe 6-311G(d,p) level of theory for compound **12**.

| <b>(Me<sub>3</sub>Si-CO<sub>2</sub>)<sub>3</sub>P<sub>7</sub></b> |                                             |                                           |
|-------------------------------------------------------------------|---------------------------------------------|-------------------------------------------|
| Bond vibration                                                    | Calculated wavenumber /<br>cm <sup>-1</sup> | Observed wavenumber /<br>cm <sup>-1</sup> |
| C=O                                                               | 1785                                        | 1623                                      |
| C—O                                                               | 1219                                        | 1122                                      |

## 5. CO<sub>2</sub> Reactivity

A J Young NMR tube was loaded with functionalised heptapnictide clusters **1-4** (50 mg) and dissolved in CDCl<sub>3</sub> (1 mL). The solution was subsequently degassed by removing the headspace of the J Young NMR tube and placing it in a sonicator. This process was repeated until no bubbles were seen upon sonication. The J Young NMR tube was then pressurised with CO<sub>2</sub> (1 atm.) and rotated to ensure dissolution of CO<sub>2</sub>. The reaction mixture was then investigated by NMR and IR spectroscopy.

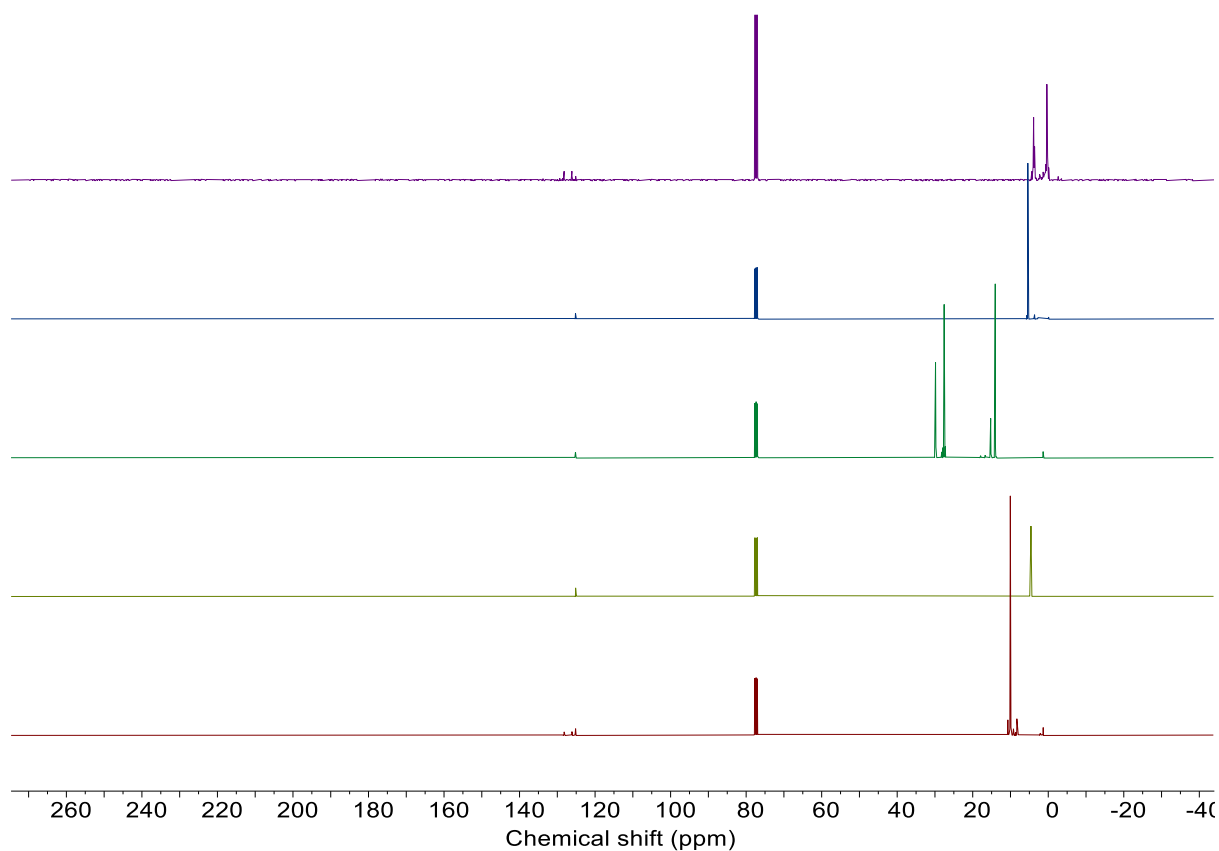

**Figure S46.** Stacked <sup>13</sup>C{H} NMR spectra (CDCl<sub>3</sub>) of reactivity of selected clusters towards CO<sub>2</sub>. Top – bottom; (Me<sub>3</sub>Si)<sub>3</sub>P<sub>7</sub>, (Me<sub>3</sub>Si)<sub>3</sub>As<sub>7</sub>, (<sup>n</sup>Bu<sub>3</sub>Sn)<sub>3</sub>P<sub>7</sub>, (Me<sub>3</sub>Ge)<sub>3</sub>P<sub>7</sub>, (Et<sub>3</sub>Ge)<sub>3</sub>P<sub>7</sub>.

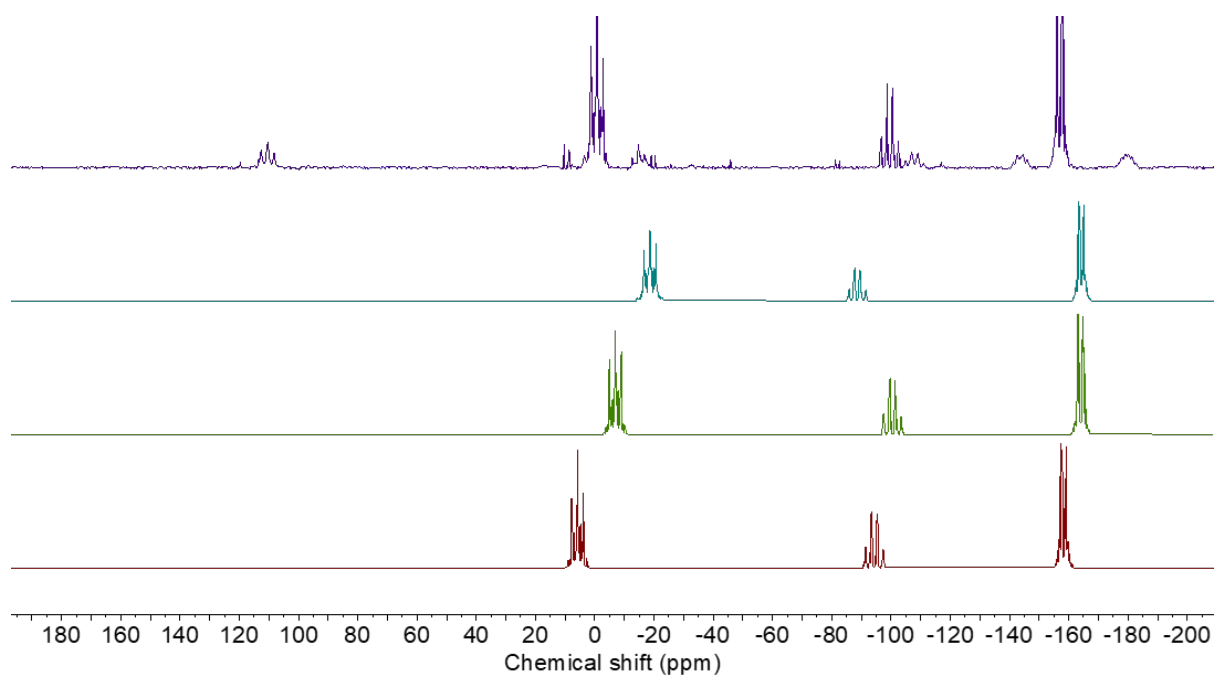

**Figure S47.** Stacked  $^{31}\text{P}$  NMR spectra ( $\text{CDCl}_3$ ) of reactivity of selected clusters towards  $\text{CO}_2$ .  
Top - bottom;  $(\text{Me}_3\text{Si})_3\text{P}_7$ ,  $(n\text{Bu}_3\text{Sn})_3\text{P}_7$ ,  $(\text{Me}_3\text{Ge})_3\text{P}_7$ ,  $(\text{Et}_3\text{Ge})_3\text{P}_7$ .

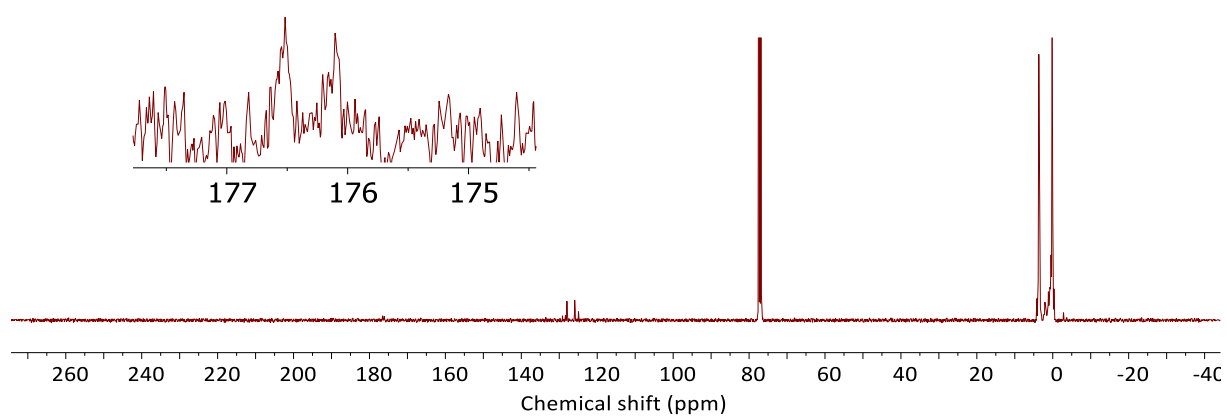

**Figure S48.**  $^{13}\text{C}\{^1\text{H}\}$  NMR spectrum ( $\text{CDCl}_3$ )  $(\text{Me}_3\text{Si})_3\text{P}_7$  reactivity towards  $\text{CO}_2$ .

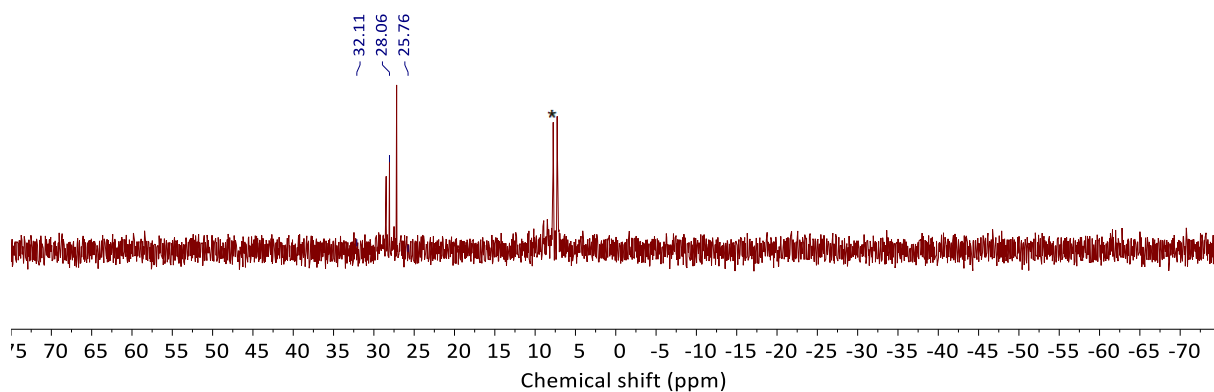

**Figure S49.**  $^{29}\text{Si}$  DEPT90 NMR spectrum ( $\text{CDCl}_3$ ) of reactivity  $(\text{Me}_3\text{Si})_3\text{P}_7$  towards  $\text{CO}_2$ .  
 $(\text{Me}_3\text{Si})_3\text{P}_7$  marked by \*.

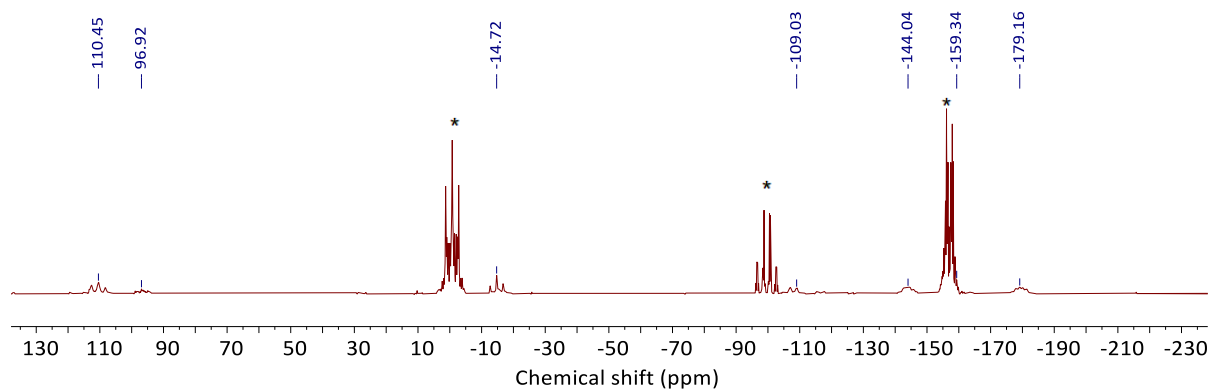

**Figure S50.**  $^{31}\text{P}$  NMR spectrum ( $\text{CDCl}_3$ ) of reactivity  $(\text{Me}_3\text{Si})_3\text{P}_7$  towards  $\text{CO}_2$ .  $(\text{Me}_3\text{Si})_3\text{P}_7$  marked by \*.

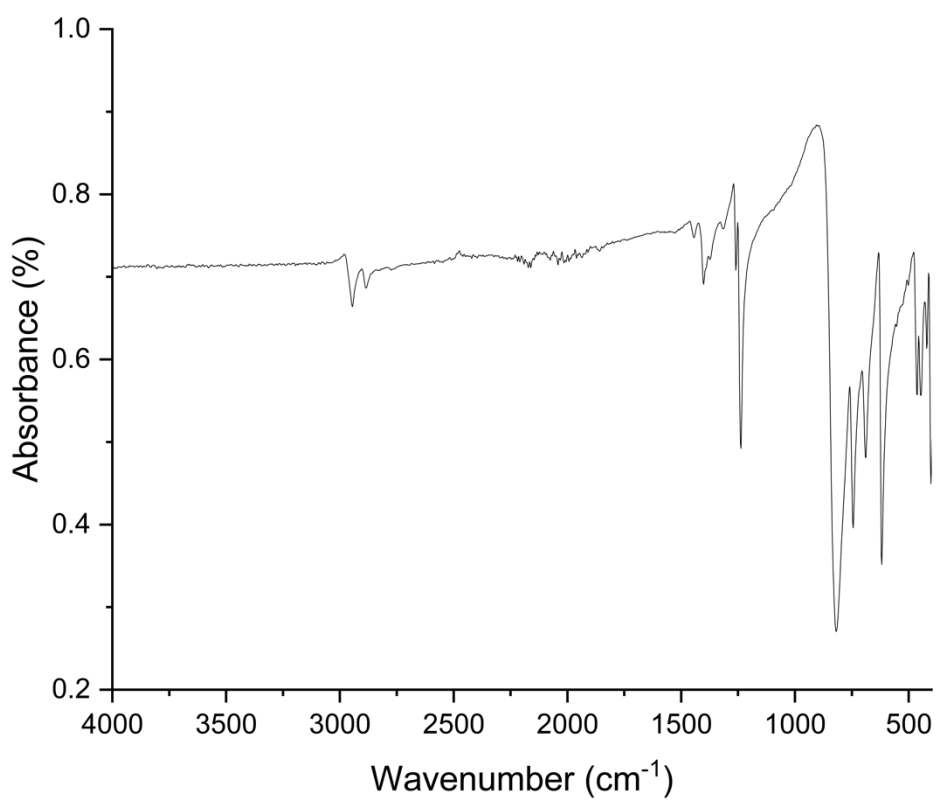

**Figure S51.** IR spectrum of  $(\text{Me}_3\text{Si})_3\text{P}_7$

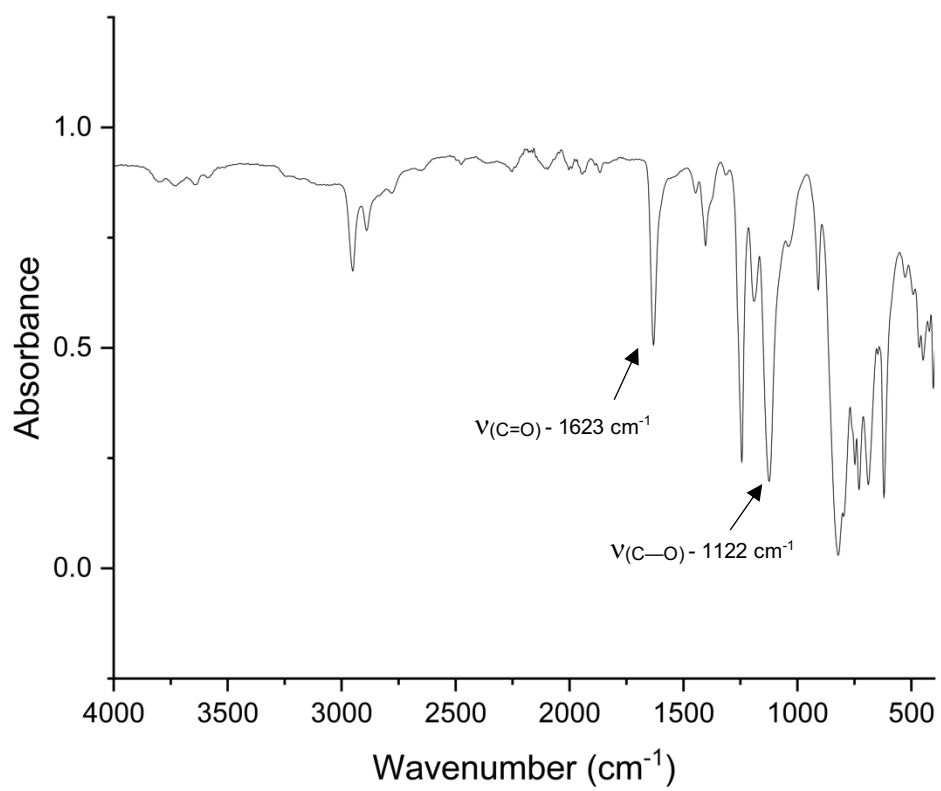

**Figure S52.** IR spectrum of **12**.

## 6. Computational Studies

### 6.1. Fluoride ion Affinity of $(R_3E)_3Pn_7$ Clusters

Lewis acidity was assessed through the calculation of Fluoride Ion Affinity (FIA) using the  $CF_2O \rightarrow CF_3O$  reaction as a reference (Christe's method).<sup>13</sup> This method was carried out using the BP86/SV(p) level of theory. The FIA of three benchmarks were calculated,  $B(C_6F_5)_3$ ,  $SbF_5$  and  $Me_3Si^+$  and are consistent with literature calculated values.<sup>14</sup>

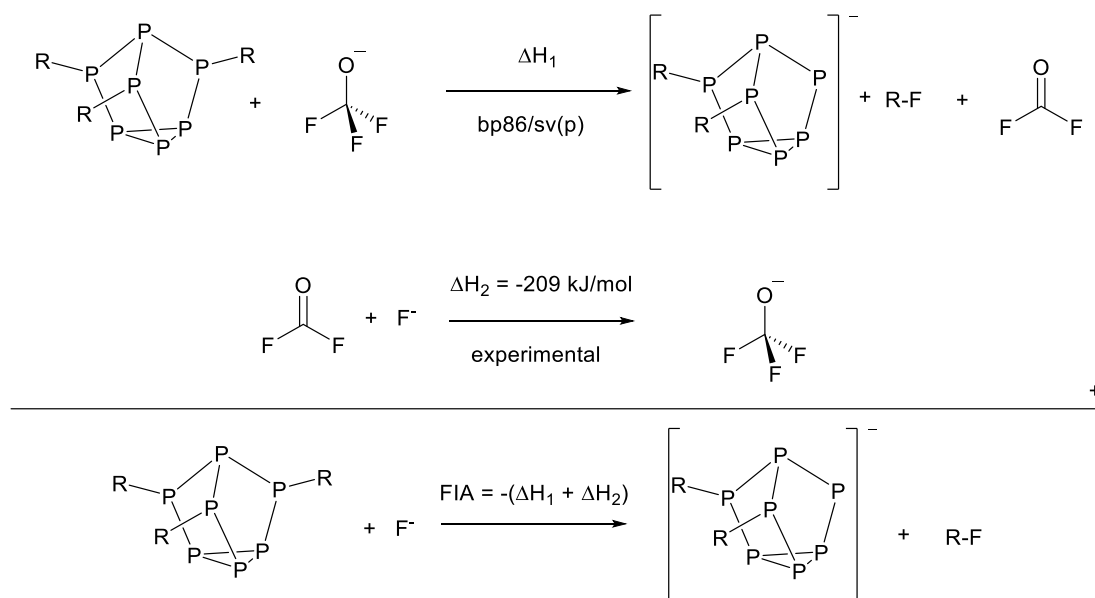

**Scheme S1.** FIA protocol used for compounds in **Table S10**.

**Table S10.** FIA values for reference Lewis acids and selected functionalised clusters, calculated at the BP86/SV(P) level of theory.

| Compound           | FIA ( $\text{kJ mol}^{-1}$ ) |                |
|--------------------|------------------------------|----------------|
| $B(C_6F_5)_3$      | 444                          |                |
| $SbF_5$            | 489                          |                |
| $[Me_3Si]^+$       | 948                          |                |
|                    | <b>Pn = P</b>                | <b>Pn = As</b> |
| $(Me_3Si)_3Pn_7$   | 324                          | 332            |
| $(Me_3Ge)_3Pn_7$   | 265                          | -              |
| $(Et_3Ge)_3Pn_7$   | 277                          | 281            |
| $(^nBu_3Sn)_3Pn_7$ | 266                          | 269            |



**Table S11.** Computed energies of reference Lewis acids Selected functionalised clusters, relating to FIA calculations, calculated at the BP86/SV(P) level of theory.

| Compound                                                                        | E / a.u.       | G / a.u.      |
|---------------------------------------------------------------------------------|----------------|---------------|
| CF <sub>2</sub> O                                                               | -312.7854163   | -312.76742    |
| [CF <sub>3</sub> O] <sup>-</sup>                                                | -412.6141114   | -412.594474   |
| B(C <sub>6</sub> F <sub>5</sub> ) <sub>3</sub>                                  | -2206.628214   | -2206.448141  |
| [FB(C <sub>6</sub> F <sub>5</sub> ) <sub>3</sub> ] <sup>-</sup>                 | -2306.547159   | -2306.364788  |
| SbF <sub>5</sub>                                                                | -6814.717684   | -6814.698435  |
| [SbF <sub>6</sub> ] <sup>-</sup>                                                | -6914.652886   | -6914.631992  |
| [Me <sub>3</sub> Si] <sup>+</sup>                                               | -408.8174622   | -408.70319    |
| Me <sub>3</sub> SiF                                                             | -508.931154136 | -508.81189    |
| <sup>n</sup> Bu <sub>3</sub> SnF                                                | -6598.24693198 | -6597.868217  |
| ( <sup>n</sup> Bu <sub>3</sub> Sn) <sub>3</sub> P <sub>7</sub>                  | -21884.4993751 | -21883.346266 |
| [( <sup>n</sup> Bu <sub>3</sub> Sn) <sub>2</sub> P <sub>7</sub> ] <sup>-</sup>  | -15386.1007131 | -15385.326736 |
| ( <sup>n</sup> Bu <sub>3</sub> Sn) <sub>3</sub> As <sub>7</sub>                 | -35146.7341606 | -35145.583690 |
| [( <sup>n</sup> Bu <sub>3</sub> Sn) <sub>2</sub> As <sub>7</sub> ] <sup>-</sup> | -28648.3367946 | -28647.565194 |
| Me <sub>3</sub> GeF                                                             | -2296.47761263 | -2296.359209  |
| (Me <sub>3</sub> Ge) <sub>3</sub> P <sub>7</sub>                                | -8979.17062838 | -8978.799105  |
| [(Me <sub>3</sub> Ge) <sub>2</sub> P <sub>7</sub> ] <sup>-</sup>                | -6782.54195196 | -6782.288315  |
| Et <sub>3</sub> GeF                                                             | -2414.31649080 | -2414.110062  |
| (Et <sub>3</sub> Ge) <sub>3</sub> P <sub>7</sub>                                | -9332.67980335 | -9332.044779  |
| [(Et <sub>3</sub> Ge) <sub>2</sub> P <sub>7</sub> ] <sup>-</sup>                | -7018.21645801 | -7017.787540  |
| (Et <sub>3</sub> Ge) <sub>3</sub> As <sub>7</sub>                               | -22594.9112847 | -22594.278756 |
| [(Et <sub>3</sub> Ge) <sub>2</sub> As <sub>7</sub> ] <sup>-</sup>               | -20280.4501365 | -20280.023356 |
| (Me <sub>3</sub> Si) <sub>3</sub> P <sub>7</sub>                                | -3616.46134639 | -3616.088086  |
| [(Me <sub>3</sub> Si) <sub>2</sub> P <sub>7</sub> ] <sup>-</sup>                | -3207.40214107 | -3207.147222  |
| (Me <sub>3</sub> Si) <sub>3</sub> As <sub>7</sub>                               | -16878.6873263 | -16878.317909 |
| [(Me <sub>3</sub> Si) <sub>2</sub> As <sub>7</sub> ] <sup>-</sup>               | -16469.6322647 | -16469.379865 |

## 6.2. Hydride ion affinity for the (R<sub>3</sub>E)<sub>3</sub>Pn<sub>7</sub> clusters.

Lewis acidity was assessed through the calculation of Hydride Ion Affinity (HIA) using the Me<sub>3</sub>Si<sup>+</sup> → Me<sub>3</sub>SiH reaction as a reference.<sup>15</sup> This method was carried out using the BP86/SV(p) level of theory.

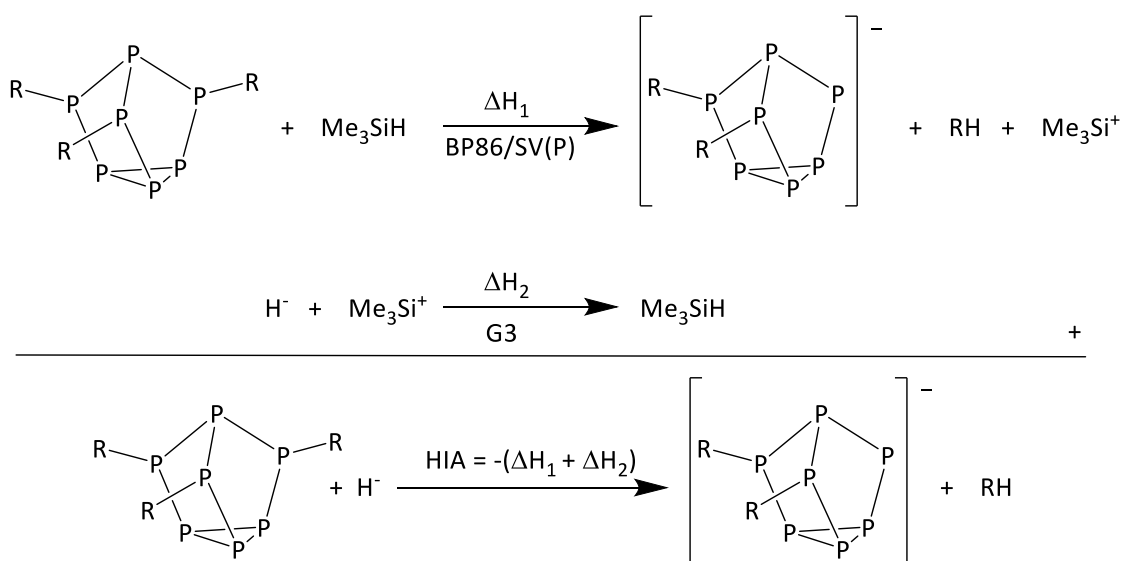

**Scheme S2.** HIA protocol used for compounds in **Table S13**.

**Table S13.** HIA values for reference Lewis acids and selected functionalised clusters, calculated at the BP86/SV(P) level of theory.

| <b>Compound</b>                                                 | <b>HIA (kJ mol<sup>-1</sup>)</b> |                |
|-----------------------------------------------------------------|----------------------------------|----------------|
| B(C <sub>6</sub> F <sub>5</sub> ) <sub>3</sub>                  | 487                              |                |
| SbF <sub>5</sub>                                                | 545                              |                |
| [Me <sub>3</sub> Si] <sup>+</sup>                               | 819                              |                |
|                                                                 | <b>Pn = P</b>                    | <b>Pn = As</b> |
| (Me <sub>3</sub> Ge) <sub>3</sub> Pn <sub>7</sub>               | 331                              | -              |
| (Et <sub>3</sub> Ge) <sub>3</sub> Pn <sub>7</sub>               | 340                              | 344            |
| ( <sup>n</sup> Bu <sub>3</sub> Sn) <sub>3</sub> Pn <sub>7</sub> | 333                              | 335            |
| (Me <sub>3</sub> Si) <sub>3</sub> Pn <sub>7</sub>               | -                                | -              |

*Note: Entries for (Me<sub>3</sub>Si)<sub>3</sub>Pn<sub>7</sub> have not been included as Me<sub>3</sub>Si<sup>+</sup> is used in the HIA protocol reference reaction (Scheme S2).*

**Table S14.** Computed energies of reference Lewis acids Selected functionalised clusters, relating to HIA calculations, calculated at the BP86/SV(P) level of theory.

| Compound                                                                        | E / a.u.          | G / a.u.          |
|---------------------------------------------------------------------------------|-------------------|-------------------|
| B(C <sub>6</sub> F <sub>5</sub> ) <sub>3</sub>                                  | -2206.628234      | -2206.44815       |
| [HB(C <sub>6</sub> F <sub>5</sub> ) <sub>3</sub> ] <sup>-</sup>                 | -2207.3285042     | -2207.14043       |
| SbF <sub>5</sub>                                                                | -6814.71771307    | -6814.698459      |
| [HSbF <sub>5</sub> ] <sup>-</sup>                                               | -6815.43952664    | -6815.412861      |
| H <sup>-</sup>                                                                  | -0.488737487818   | -0.486377         |
| Me <sub>3</sub> Si <sup>+</sup>                                                 | -408.817035912    | -408.703695       |
| Me <sub>3</sub> SiH                                                             | -409.699318773    | -409.575699       |
| Me <sub>3</sub> GeH                                                             | -2197.26657258    | -2197.143811      |
| (Me <sub>3</sub> Ge) <sub>3</sub> P <sub>7</sub>                                | -8979.17062394    | -8978.799096      |
| [(Me <sub>3</sub> Ge) <sub>2</sub> P <sub>7</sub> ] <sup>-</sup>                | -6782.54195195    | -6782.288315      |
| Et <sub>3</sub> GeH                                                             | -2315.10390822    | -2314.893338      |
| (Et <sub>3</sub> Ge) <sub>3</sub> P <sub>7</sub>                                | -9332.67980334    | -9332.044779      |
| [(Et <sub>3</sub> Ge) <sub>2</sub> P <sub>7</sub> ] <sup>-</sup>                | -7018.21645801    | -7017.78754       |
| (Et <sub>3</sub> Ge) <sub>3</sub> As <sub>7</sub>                               | -22594.9110235    | -22594.278624     |
| [(Et <sub>3</sub> Ge) <sub>2</sub> As <sub>7</sub> ] <sup>-</sup>               | -20280.449888     | -20280.023073     |
| <sup>n</sup> Bu <sub>3</sub> SnH                                                | -6499.03533519    | -6498.653163      |
| ( <sup>n</sup> Bu <sub>3</sub> Sn) <sub>3</sub> P <sub>7</sub>                  | -21884.4993749    | -21883.346266     |
| [( <sup>n</sup> Bu <sub>3</sub> Sn) <sub>2</sub> P <sub>7</sub> ] <sup>-</sup>  | -15386.1006414    | -15385.326765     |
| ( <sup>n</sup> Bu <sub>3</sub> Sn) <sub>3</sub> As <sub>7</sub>                 | -35146.7341605999 | -35145.5836899999 |
| [( <sup>n</sup> Bu <sub>3</sub> Sn) <sub>2</sub> As <sub>7</sub> ] <sup>-</sup> | -28648.3367946    | -28647.565194     |

### 6.3. Lewis acid binding affinity for PhNCO and TsNCO inserted products of (R<sub>3</sub>E)<sub>3</sub>Pn<sub>7</sub> clusters

Experimental observations suggest that the Lewis acidic tetrel moiety binds preferentially to either the oxygen or the nitrogen atom of the corresponding isocyanate on all three arms of the cluster (O,O,O vs N,N,N). These binding affinities were calculated computationally by taking the difference in energy between the [O,O,O]–[N,N,N] binding modes, calculated at the pbe1pbe/6-311G(d,p) level of theory.

**Table S15.** Computed difference in energies between O,O,O and N,N,N tetrel binding modes of the Lewis acidic moieties for compounds **6-11** and (Me<sub>3</sub>Sn-TsNCO)<sub>3</sub>P<sub>7</sub>, calculated at the PBE1PBE/6-311G(d,p) level of theory.

| Compound                                                             | ΔE / kJ mol <sup>-1</sup> | ΔG / kJ mol <sup>-1</sup> |
|----------------------------------------------------------------------|---------------------------|---------------------------|
| (Me <sub>3</sub> Ge-PhNCO) <sub>3</sub> P <sub>7</sub>               | 61.3                      | 54.4                      |
| (Et <sub>3</sub> Ge-PhNCO) <sub>3</sub> P <sub>7</sub>               | 41.7                      | 31.4                      |
| (Me <sub>3</sub> Ge-TsNCO) <sub>3</sub> P <sub>7</sub>               | 2.4                       | -1.1                      |
| (Et <sub>3</sub> Ge-TsNCO) <sub>3</sub> P <sub>7</sub>               | 1.5                       | -18.9                     |
| ( <sup>n</sup> Bu <sub>3</sub> Sn-TsNCO) <sub>3</sub> P <sub>7</sub> | 19.3                      | 7.2                       |
| (Me <sub>3</sub> Si-TsNCO) <sub>3</sub> As <sub>7</sub>              | -35.5                     | -48.2                     |

Note: All listed energies in **Table S15** are calculated by taking the free energy of the O,O,O mode and subtracting the free energy of the N,N,N mode. Thus, a positive number suggests

that tetrel N,N,N is preferred and a negative number that O,O,O coordination is more favourable.

**Table S16.** Computed energies of inserted products **6-11** and  $(\text{Me}_3\text{Sn-TsNCO})_3\text{P}_7$ .

| Compound                                     | N,N,N          |               | O,O,O          |               |
|----------------------------------------------|----------------|---------------|----------------|---------------|
|                                              | E / a.u.       | G / a.u.      | E / a.u.       | G / a.u.      |
| $(\text{Me}_3\text{Ge-PhNCO})_3\text{P}_7$   | -10175.9510773 | -10175.385603 | -10175.9281277 | -10175.364978 |
| $(\text{Et}_3\text{Ge-PhNCO})_3\text{P}_7$   | -10529.3813067 | -10528.570457 | -10529.3654242 | -10528.558509 |
| $(\text{Me}_3\text{Ge-TsNCO})_3\text{P}_7$   | -11938.7702743 | -11938.11447  | -11938.769376  | -11938.114894 |
| $(\text{Et}_3\text{Ge-TsNCO})_3\text{P}_7$   | -12292.2042706 | -12291.299041 | -12292.2037186 | -12291.306242 |
| $(^n\text{Bu}_3\text{Sn-TsNCO})_3\text{P}_7$ | -24842.1321144 | -24840.765447 | -24842.124764  | -24840.762713 |
| $(\text{Me}_3\text{Si-TsNCO})_3\text{As}_7$  | -19837.3253321 | -19836.676104 | -19837.3388398 | -19836.694453 |

## 6.2. CO<sub>2</sub> Capture with $(\text{R}_3\text{E})_3\text{Pn}_7$ Clusters.

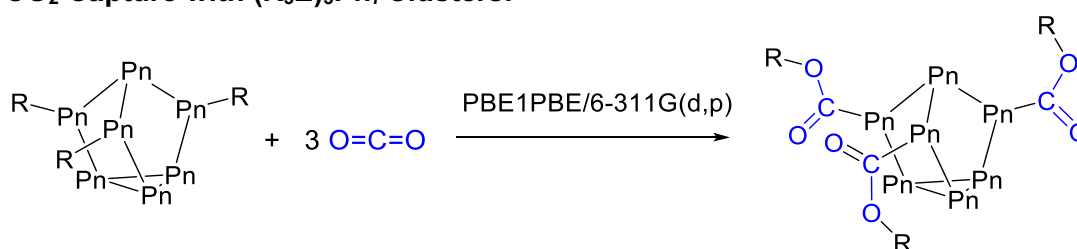

**Scheme S2.** Capture of CO<sub>2</sub> at group 14 functionalised [Pn] clusters.

**Table S17.** Computed energies for the capture of CO<sub>2</sub> at group 14 functionalised [Pn] clusters. Performed at the PBE1PBE/6-311G(d,p) level of theory. [a] Calculated using SV(p) basis set for Sn atoms.

| Compound                                               | $\Delta\text{G}$ (kJ/mol) |
|--------------------------------------------------------|---------------------------|
| $(\text{Me}_3\text{Si})_3\text{P}_7$                   | -27.1                     |
| $(\text{Me}_3\text{Ge})_3\text{P}_7$                   | 93.2                      |
| $(\text{Et}_3\text{Ge})_3\text{P}_7$                   | 91.9                      |
| $(^n\text{Bu}_3\text{Sn})_3\text{P}_7$ <sup>[a]</sup>  | 100.2                     |
| $(\text{Me}_3\text{Si})_3\text{As}_7$                  | -32.2                     |
| $(\text{Et}_3\text{Ge})_3\text{As}_7$                  | 94.5                      |
| $(^n\text{Bu}_3\text{Sn})_3\text{As}_7$ <sup>[a]</sup> | 136.5                     |

**Table S18.** Computed energies for the capture of CO<sub>2</sub> at group 14 functionalised [Pn] clusters. Performed at the PBE1PBE/6-311G(d,p) level of theory. [a] Calculated using SV(p) basis set for Sn atoms.

| Compound                                                                                        | E / a.u.      | G / a.u.      |
|-------------------------------------------------------------------------------------------------|---------------|---------------|
| CO <sub>2</sub>                                                                                 | -188.437815   | -188.423625   |
| (Me <sub>3</sub> Si) <sub>3</sub> P <sub>7</sub>                                                | -3615.871612  | -3615.486748  |
| (Me <sub>3</sub> Si-CO <sub>2</sub> ) <sub>3</sub> P <sub>7</sub>                               | -4181.202418  | -4180.767937  |
| (Me <sub>3</sub> Ge) <sub>3</sub> P <sub>7</sub>                                                | -8977.813650  | -8977.430293  |
| (Me <sub>3</sub> Ge-CO <sub>2</sub> ) <sub>3</sub> P <sub>7</sub>                               | -9543.098316  | -9542.665690  |
| (Et <sub>3</sub> Ge) <sub>3</sub> P <sub>7</sub>                                                | -9331.248783  | -9330.592955  |
| (Et <sub>3</sub> Ge-CO <sub>2</sub> ) <sub>3</sub> P <sub>7</sub>                               | -9896.534228  | -9895.828833  |
| ( <sup>n</sup> Bu <sub>3</sub> Sn) <sub>3</sub> P <sub>7</sub> <sup>[a]</sup>                   | -21881.168602 | -21879.978911 |
| ( <sup>n</sup> Bu <sub>3</sub> Sn-CO <sub>2</sub> ) <sub>3</sub> P <sub>7</sub> <sup>[a]</sup>  | -22446.450550 | -22445.211615 |
| (Me <sub>3</sub> Si) <sub>3</sub> As <sub>7</sub>                                               | -16876.337472 | -16875.955770 |
| (Me <sub>3</sub> Si-CO <sub>2</sub> ) <sub>3</sub> As <sub>7</sub>                              | -17441.669937 | -17441.238918 |
| (Et <sub>3</sub> Ge) <sub>3</sub> As <sub>7</sub>                                               | -22591.715636 | -22591.063174 |
| (Et <sub>3</sub> Ge-CO <sub>2</sub> ) <sub>3</sub> As <sub>7</sub>                              | -23157.000037 | -23156.298067 |
| ( <sup>n</sup> Bu <sub>3</sub> Sn) <sub>3</sub> As <sub>7</sub> <sup>[a]</sup>                  | -35141.644033 | -35140.457269 |
| ( <sup>n</sup> Bu <sub>3</sub> Sn-CO <sub>2</sub> ) <sub>3</sub> As <sub>7</sub> <sup>[a]</sup> | -35706.911783 | -35705.676149 |

### 6.3. Optimised Structures BP86/SV(p) Level of Theory for FIA calculations

CF2O

Charge = 0 Multiplicity = 1

|   |               |               |              |
|---|---------------|---------------|--------------|
| O | -0.0466230000 | -0.7269130000 | 0.7078620000 |
| C | -0.0198320000 | 0.4570640000  | 0.6604760000 |
| F | -1.0755860000 | 1.2641720000  | 0.6177690000 |
| F | 1.0710410000  | 1.2166780000  | 0.6398920000 |

[CF3O]-

Charge = -1 Multiplicity = 1

|   |               |               |              |
|---|---------------|---------------|--------------|
| O | -0.0024660000 | -0.0727380000 | 0.7919310000 |
| C | -0.0077480000 | -1.2197580000 | 1.2200720000 |
| F | -0.0372870000 | -1.3904350000 | 2.6566080000 |
| F | 1.1166540000  | -2.0616680000 | 0.8724600000 |
| F | -1.1111530000 | -2.0694010000 | 0.8259280000 |

B(C<sub>6</sub>F<sub>5</sub>)<sub>3</sub>

Charge = 0 Multiplicity = 1

|   |               |              |               |
|---|---------------|--------------|---------------|
| B | -0.1527200000 | 0.4557970000 | -0.1605200000 |
|---|---------------|--------------|---------------|

|   |               |               |               |
|---|---------------|---------------|---------------|
| C | -0.5860590000 | 1.3581700000  | -1.3766080000 |
| C | -0.1083040000 | -1.1107320000 | -0.3176840000 |
| C | 0.2355380000  | 1.1209860000  | 1.2133700000  |
| C | -0.0238350000 | -3.9535890000 | -0.6022600000 |
| C | 0.3991710000  | -3.1282370000 | -1.6617220000 |
| C | 0.3396250000  | -1.7339100000 | -1.5065250000 |
| C | -0.5130710000 | -1.9823330000 | 0.7209530000  |
| C | -0.4887670000 | -3.3807870000 | 0.5971040000  |
| F | 0.0160700000  | -5.2789060000 | -0.7349120000 |
| F | 0.8493990000  | -3.6771200000 | -2.7944170000 |
| F | 0.7672890000  | -0.9904480000 | -2.5413400000 |
| F | -0.9782470000 | -1.4844150000 | 1.8795460000  |
| F | -0.8990550000 | -4.1686170000 | 1.5960760000  |
| C | 0.9379580000  | 2.3272340000  | 3.7079460000  |
| C | 1.6577230000  | 1.2114750000  | 3.2392850000  |
| C | 1.2910990000  | 0.6273090000  | 2.0161560000  |
| C | -0.4498370000 | 2.2498640000  | 1.7217490000  |
| C | -0.1271350000 | 2.8499490000  | 2.9495890000  |
| F | 1.2651870000  | 2.8894560000  | 4.8708630000  |
| F | 2.6748620000  | 0.7255680000  | 3.9577470000  |
| F | 2.0184480000  | -0.4257380000 | 1.6056550000  |
| F | -1.4829100000 | 2.7773710000  | 1.0427140000  |
| F | -0.8136720000 | 3.9032240000  | 3.4036760000  |
| C | -1.3737740000 | 2.9974720000  | -3.5815760000 |
| C | -2.0361030000 | 1.7786450000  | -3.3397880000 |
| C | -1.6274720000 | 0.9825950000  | -2.2575660000 |
| C | 0.0416280000  | 2.5951620000  | -1.6551120000 |
| C | -0.3235410000 | 3.4096670000  | -2.7390890000 |
| F | -1.7413530000 | 3.7617730000  | -4.6093870000 |
| F | -3.0391770000 | 1.3964250000  | -4.1365090000 |
| F | -2.3001260000 | -0.1641980000 | -2.0603520000 |
| F | 1.0588850000  | 3.0253600000  | -0.8892410000 |
| F | 0.3092550000  | 4.5625400000  | -2.9788190000 |

[FB(C<sub>6</sub>F<sub>5</sub>)<sub>2</sub>]<sup>-</sup>

Charge = -1 Multiplicity = 1

|   |               |               |               |
|---|---------------|---------------|---------------|
| B | -1.0312930000 | 0.2232650000  | 0.0282600000  |
| C | -0.9890050000 | 1.2531340000  | -1.2823180000 |
| C | -0.3707440000 | -1.2773630000 | -0.2797500000 |
| C | -0.2759520000 | 1.0317420000  | 1.2858070000  |
| C | 0.5070170000  | -3.9914620000 | -0.6547500000 |
| C | 0.4773630000  | -3.0981990000 | -1.7352940000 |
| C | 0.0361790000  | -1.7742170000 | -1.5287690000 |
| C | -0.3270790000 | -2.2166340000 | 0.7693280000  |
| C | 0.1011300000  | -3.5465250000 | 0.6148250000  |
| F | 0.9186910000  | -5.2624450000 | -0.8310130000 |
| F | 0.8572570000  | -3.5187830000 | -2.9597680000 |
| F | 0.0221920000  | -0.9984240000 | -2.6379190000 |
| F | -0.6982780000 | -1.8584350000 | 2.0180080000  |
| F | 0.1283960000  | -4.3989990000 | 1.6599830000  |
| C | 0.8329230000  | 2.5318650000  | 3.4745310000  |
| C | 1.5555730000  | 1.4758250000  | 2.8979060000  |
| C | 0.9954700000  | 0.7624780000  | 1.8202290000  |
| C | -0.9522780000 | 2.1116220000  | 1.8861300000  |
| C | -0.4358920000 | 2.8532150000  | 2.9663140000  |
| F | 1.3509140000  | 3.2296770000  | 4.5048280000  |
| F | 2.7781100000  | 1.1653470000  | 3.3773000000  |
| F | 1.7704130000  | -0.2248360000 | 1.3162040000  |
| F | -2.1605890000 | 2.5039580000  | 1.4302660000  |
| F | -1.1318830000 | 3.8755200000  | 3.5062330000  |
| C | -0.8508750000 | 3.1531150000  | -3.4367820000 |
| C | -2.0824890000 | 2.6064350000  | -3.0465420000 |
| C | -2.1310160000 | 1.6724020000  | -1.9899130000 |
| C | 0.2195170000  | 1.8229440000  | -1.7215220000 |
| C | 0.3193290000  | 2.7532990000  | -2.7702760000 |
| F | -0.7891280000 | 4.0449120000  | -4.4458020000 |
| F | -3.2081690000 | 2.9781200000  | -3.6917710000 |
| F | -3.3572600000 | 1.1913170000  | -1.7056160000 |
| F | 1.3867140000  | 1.4601540000  | -1.1373620000 |
| F | 1.5113150000  | 3.2615440000  | -3.1462110000 |
| F | -2.3785710000 | -0.0295660000 | 0.4192040000  |

SbF<sub>5</sub>

Charge = 0 Multiplicity = 1

|    |               |               |               |
|----|---------------|---------------|---------------|
| F  | -1.9354430000 | 0.7880830000  | 0.0118850000  |
| F  | 0.1865520000  | 1.0762600000  | -1.6358360000 |
| F  | -1.0232240000 | -1.7224270000 | -0.3860040000 |
| F  | 0.2213570000  | 0.5881340000  | 1.6245680000  |
| F  | 1.5235260000  | -0.8318660000 | -0.2673920000 |
| Sb | -0.2057670000 | -0.0211940000 | -0.1292210000 |

[SbF<sub>6</sub>]<sup>-</sup>

Charge = -1 Multiplicity = 1

|    |               |               |               |
|----|---------------|---------------|---------------|
| F  | 0.6934610000  | 1.8491390000  | 0.2844740000  |
| F  | 0.2883260000  | -0.4182980000 | 1.7840280000  |
| F  | -1.8501630000 | 0.8765200000  | 0.6436940000  |
| F  | -0.6454980000 | 0.6963010000  | -1.8202990000 |
| F  | 1.4930270000  | -0.5985220000 | -0.6799630000 |
| F  | -1.0505750000 | -1.5711420000 | -0.3207950000 |
| Sb | -0.1785690000 | 0.1390010000  | -0.0181390000 |

(Me<sub>3</sub>Si)<sub>3</sub>P<sub>7</sub>

Charge = 0 Multiplicity = 1

|    |               |               |               |
|----|---------------|---------------|---------------|
| P  | -0.4531200000 | 0.0273000000  | -0.3213600000 |
| P  | 0.5239630000  | 0.2945230000  | -2.3048660000 |
| P  | 0.5912810000  | -1.8422420000 | 0.2898830000  |
| P  | -2.3536600000 | -0.8906030000 | -1.0342170000 |
| P  | 0.2145770000  | -3.2067080000 | -1.4476510000 |
| P  | -1.6369940000 | -2.4250850000 | -2.5008900000 |
| P  | 0.4233020000  | -1.7631900000 | -3.1850560000 |
| Si | 2.7932550000  | 0.5756030000  | -1.8827070000 |
| Si | -0.6831780000 | -2.8014950000 | 1.9817350000  |
| Si | -3.3674480000 | 0.6933460000  | -2.4059720000 |
| C  | -3.1718340000 | 2.3701160000  | -1.5427920000 |
| C  | -5.1926350000 | 0.1711030000  | -2.4241120000 |
| C  | -2.7088550000 | 0.7554940000  | -4.1794280000 |
| C  | -1.1547630000 | -1.4012860000 | 3.1710980000  |
| C  | 0.5269180000  | -3.9966870000 | 2.8253900000  |



|   |              |              |              |
|---|--------------|--------------|--------------|
| C | -2.213760000 | -3.746469000 | 1.394769000  |
| C | 2.926809000  | 1.749128000  | -0.398776000 |
| C | 3.441045000  | 1.424778000  | -3.452350000 |
| C | 3.762756000  | -1.021304000 | -1.579321000 |
| H | 2.340079000  | 2.677375000  | -0.557919000 |
| H | 3.989207000  | 2.037615000  | -0.243413000 |
| H | 2.562031000  | 1.265365000  | 0.530565000  |
| H | 3.388913000  | -1.551041000 | -0.679787000 |
| H | 4.837021000  | -0.777156000 | -1.426749000 |
| H | 3.688005000  | -1.711410000 | -2.445185000 |
| H | 2.904289000  | 2.375111000  | -3.652191000 |
| H | 3.322993000  | 0.771740000  | -4.342277000 |
| H | 4.523263000  | 1.655015000  | -3.342642000 |
| H | 0.034128000  | -4.492697000 | 3.689835000  |
| H | 1.425906000  | -3.464556000 | 3.199317000  |
| H | 0.864895000  | -4.790597000 | 2.127007000  |
| H | -1.940585000 | -4.555167000 | 0.685630000  |
| H | -2.929403000 | -3.068629000 | 0.886722000  |
| H | -2.721016000 | -4.211128000 | 2.268558000  |
| H | -1.631754000 | -1.827365000 | 4.080547000  |
| H | -1.874710000 | -0.698502000 | 2.703713000  |
| H | -0.264559000 | -0.821753000 | 3.492014000  |
| H | -5.788558000 | 0.889981000  | -3.027675000 |
| H | -5.618691000 | 0.144299000  | -1.399910000 |
| H | -5.320379000 | -0.835677000 | -2.874032000 |
| H | -3.755389000 | 3.143194000  | -2.088524000 |
| H | -2.109547000 | 2.689028000  | -1.525001000 |
| H | -3.541155000 | 2.336904000  | -0.497053000 |
| H | -1.634544000 | 1.029674000  | -4.198053000 |
| H | -3.279283000 | 1.514643000  | -4.758397000 |
| H | -2.826818000 | -0.223586000 | -4.688481000 |

$[(\text{Me}_3\text{Si})_2\text{P}_7]^-$

Charge = -1 Multiplicity = 1

|   |              |              |              |
|---|--------------|--------------|--------------|
| P | -0.405954000 | -0.055455000 | -0.069358000 |
| P | 0.414004000  | 0.276324000  | -2.161265000 |

|    |               |               |               |
|----|---------------|---------------|---------------|
| P  | 0.4510290000  | -1.9305040000 | 0.6251970000  |
| P  | -2.3647230000 | -0.9015210000 | -0.8051280000 |
| P  | 0.2024040000  | -3.1553780000 | -1.1596670000 |
| P  | -1.6914680000 | -2.4654260000 | -2.2560010000 |
| P  | 0.3558760000  | -1.7795870000 | -3.0066370000 |
| Si | 2.6753490000  | 0.5032530000  | -1.8126800000 |
| Si | -3.3211350000 | 0.6467400000  | -2.2172180000 |
| C  | -3.0449240000 | 2.3851230000  | -1.4848780000 |
| C  | -5.1972200000 | 0.2748920000  | -2.1695290000 |
| C  | -2.7904780000 | 0.6385210000  | -4.0441990000 |
| C  | 2.9190610000  | 1.7654290000  | -0.4053910000 |
| C  | 3.3842820000  | 1.2567560000  | -3.4207430000 |
| C  | 3.6335810000  | -1.0848000000 | -1.4144180000 |
| H  | 2.3602560000  | 2.7040980000  | -0.6038040000 |
| H  | 3.9958020000  | 2.0189910000  | -0.2861550000 |
| H  | 2.5485400000  | 1.3451580000  | 0.5526000000  |
| H  | 3.1756700000  | -1.5752110000 | -0.5285970000 |
| H  | 4.7022010000  | -0.8549930000 | -1.2044360000 |
| H  | 3.5855800000  | -1.8019590000 | -2.2602150000 |
| H  | 2.8844930000  | 2.2169480000  | -3.6688890000 |
| H  | 3.2318410000  | 0.5665500000  | -4.2774280000 |
| H  | 4.4765150000  | 1.4471310000  | -3.3235390000 |
| H  | -5.7669940000 | 1.0054730000  | -2.7862820000 |
| H  | -5.5864270000 | 0.3180800000  | -1.1304050000 |
| H  | -5.4061670000 | -0.7426610000 | -2.5630510000 |
| H  | -3.6145130000 | 3.1507640000  | -2.0572390000 |
| H  | -1.9674530000 | 2.6484240000  | -1.5184540000 |
| H  | -3.3705500000 | 2.4284610000  | -0.4244240000 |
| H  | -1.7016430000 | 0.8314240000  | -4.1331150000 |
| H  | -3.3439610000 | 1.4227280000  | -4.6078720000 |
| H  | -3.0018760000 | -0.3457740000 | -4.5117770000 |

Me<sub>3</sub>SiF

Charge = 0 Multiplicity = 1

|    |               |               |               |
|----|---------------|---------------|---------------|
| Si | -0.0002000000 | -0.0001130000 | -0.0000860000 |
| C  | -1.8306730000 | -0.2180430000 | -0.0001470000 |

|   |               |               |               |
|---|---------------|---------------|---------------|
| C | 1.1043370000  | -1.4757570000 | 0.0000570000  |
| C | 0.7265010000  | 1.6938980000  | 0.0000840000  |
| H | 1.7763700000  | -1.4347240000 | -0.8884030000 |
| H | 0.5543200000  | -2.4369350000 | 0.0008830000  |
| H | 1.7777070000  | -1.4337300000 | 0.8874080000  |
| H | -2.1314140000 | -0.8264600000 | -0.8843510000 |
| H | -2.3870780000 | 0.7394000000  | -0.0054770000 |
| H | -2.1314250000 | -0.8157220000 | 0.8914840000  |
| H | 0.3534440000  | 2.2567190000  | 0.8870480000  |
| H | 0.3559000000  | 2.2553790000  | -0.8888160000 |
| H | 1.8339950000  | 1.6970620000  | 0.0014590000  |

(Me<sub>3</sub>Ge)<sub>3</sub>P<sub>7</sub>

Charge = 0 Multiplicity = 1

|    |               |               |               |
|----|---------------|---------------|---------------|
| Ge | 1.1191830000  | 3.4482640000  | 0.2274760000  |
| Ge | 2.5418900000  | -2.6219060000 | -0.2670780000 |
| P  | -1.1916270000 | -1.4975700000 | -0.0543670000 |
| P  | 1.9586240000  | -0.3720160000 | 0.3179220000  |
| P  | -0.6150770000 | 1.7988540000  | 0.3212000000  |
| P  | 0.1394670000  | 0.0841540000  | -0.8832170000 |
| P  | -1.0719000000 | -1.1250680000 | 2.1542860000  |
| P  | 1.1251010000  | -0.6127620000 | 2.3872490000  |
| P  | -0.4336550000 | 1.0338900000  | 2.4221110000  |
| C  | 2.5586440000  | 3.2011400000  | 1.5557290000  |
| H  | 3.2838380000  | 4.0364860000  | 1.4597180000  |
| H  | 2.1468820000  | 3.2036720000  | 2.5845940000  |
| C  | 0.1739840000  | 5.1519260000  | 0.5776270000  |
| H  | -0.2733900000 | 5.1513790000  | 1.5919220000  |
| H  | 0.8917900000  | 5.9960840000  | 0.5110310000  |
| C  | 1.5839410000  | -4.0087920000 | 0.7601790000  |
| H  | 1.9546180000  | -5.0079760000 | 0.4484170000  |
| H  | 1.7645400000  | -3.8850080000 | 1.8465350000  |
| C  | 1.8401660000  | 3.4455500000  | -1.6132790000 |
| H  | 2.3775000000  | 2.4986510000  | -1.8185360000 |
| H  | 1.0263230000  | 3.5628530000  | -2.3562190000 |
| C  | 2.2313230000  | -2.8271060000 | -2.2089900000 |

|    |               |               |               |
|----|---------------|---------------|---------------|
| H  | 2.6189130000  | -3.8138710000 | -2.5382730000 |
| H  | 1.1479850000  | -2.7750460000 | -2.4355300000 |
| H  | 4.8614920000  | -3.7312160000 | -0.1651720000 |
| H  | 5.0371680000  | -1.9601950000 | -0.4536960000 |
| C  | -3.3887350000 | -0.0429690000 | -2.4060160000 |
| H  | -2.9342440000 | -0.7630310000 | -3.1152050000 |
| H  | -3.5949050000 | 1.4366690000  | 0.7151350000  |
| C  | 4.4803180000  | -2.7281960000 | 0.1194630000  |
| Ge | -3.4191880000 | -0.7864680000 | -0.5744140000 |
| C  | -4.1902440000 | 0.5025470000  | 0.7063470000  |
| H  | -4.2057830000 | 0.0758500000  | 1.7289360000  |
| C  | -4.4719510000 | -2.4628810000 | -0.5473600000 |
| H  | -4.4590770000 | -2.9177170000 | 0.4634680000  |
| H  | -5.5255920000 | -2.2449280000 | -0.8210690000 |
| H  | -2.8085360000 | 0.9007490000  | -2.4338110000 |
| H  | 0.4951720000  | -3.9462770000 | 0.5667670000  |
| H  | 2.7545480000  | -2.0333570000 | -2.7782880000 |
| H  | 4.6744930000  | -2.5725060000 | 1.1996530000  |
| H  | -4.0615050000 | -3.1958080000 | -1.2702200000 |
| H  | -4.4289010000 | 0.1672860000  | -2.7313360000 |
| H  | -5.2321750000 | 0.7345240000  | 0.4009280000  |
| H  | -0.6334360000 | 5.3123100000  | -0.1642740000 |
| H  | 2.5501920000  | 4.2910390000  | -1.7282820000 |
| H  | 3.0818260000  | 2.2407950000  | 1.3799390000  |

[(Me<sub>3</sub>Ge)<sub>2</sub>P<sub>7</sub>]<sup>-</sup>

Charge = -1 Multiplicity = 1

|    |               |               |               |
|----|---------------|---------------|---------------|
| Ge | 2.4984510000  | -2.6063610000 | -0.0843120000 |
| P  | -1.0796940000 | -1.5223150000 | -0.0051670000 |
| P  | 1.9505810000  | -0.4805580000 | 0.8184670000  |
| P  | -0.4397050000 | 1.8086660000  | 1.0604240000  |
| P  | 0.2096780000  | 0.3105210000  | -0.3753550000 |
| P  | -1.2028830000 | -1.5513210000 | 2.2159010000  |
| P  | 0.9693820000  | -1.0836300000 | 2.7428290000  |
| P  | -0.6011420000 | 0.5807520000  | 2.8565020000  |
| C  | 1.5306420000  | -4.1932030000 | 0.6107290000  |

|    |               |               |               |
|----|---------------|---------------|---------------|
| H  | 1.8957010000  | -5.1087370000 | 0.0970580000  |
| H  | 1.6995820000  | -4.2974610000 | 1.7013770000  |
| C  | 2.3137800000  | -2.5461790000 | -2.0625840000 |
| H  | 2.6995970000  | -3.4852410000 | -2.5143330000 |
| H  | 1.2461900000  | -2.4239890000 | -2.3331400000 |
| H  | 4.7923190000  | -3.8359070000 | -0.1222880000 |
| H  | 5.0374580000  | -2.0479940000 | -0.0948050000 |
| C  | -3.1750210000 | 0.2825570000  | -2.2182140000 |
| H  | -2.6957040000 | -0.3302660000 | -3.0083530000 |
| H  | -3.4346360000 | 1.2653270000  | 1.0993380000  |
| C  | 4.4333910000  | -2.8811650000 | 0.3191610000  |
| Ge | -3.2505400000 | -0.7173250000 | -0.5027590000 |
| C  | -4.1077220000 | 0.4119540000  | 0.8772750000  |
| H  | -4.2620060000 | -0.1683340000 | 1.8090390000  |
| C  | -4.3935240000 | -2.3250790000 | -0.7973830000 |
| H  | -4.4539880000 | -2.9294900000 | 0.1308120000  |
| H  | -5.4222030000 | -2.0226910000 | -1.0896830000 |
| H  | -2.5803910000 | 1.2076050000  | -2.0816420000 |
| H  | 0.4435800000  | -4.0761420000 | 0.4309860000  |
| H  | 2.8804910000  | -1.6886610000 | -2.4786010000 |
| H  | 4.5975360000  | -2.9156550000 | 1.4158070000  |
| H  | -3.9684370000 | -2.9627980000 | -1.5994170000 |
| H  | -4.2005390000 | 0.5548310000  | -2.5479120000 |
| H  | -5.0892260000 | 0.7822880000  | 0.5102430000  |

Me<sub>3</sub>GeF

Charge = 0 Multiplicity = 1

|    |              |               |               |
|----|--------------|---------------|---------------|
| Ge | 3.0398140000 | -3.3191960000 | -0.6484650000 |
| C  | 1.6003720000 | -4.5662200000 | -1.1248160000 |
| H  | 2.0211770000 | -5.5446120000 | -1.4359860000 |
| H  | 0.9306850000 | -4.7303300000 | -0.2569640000 |
| C  | 4.1835670000 | -2.8498380000 | -2.1733670000 |
| H  | 4.7293360000 | -3.7441520000 | -2.5388910000 |
| H  | 3.5703640000 | -2.4470270000 | -3.0042090000 |
| H  | 4.6035560000 | -4.8337420000 | 0.7193960000  |
| H  | 4.7979860000 | -3.1125830000 | 1.2110990000  |

|   |              |               |               |
|---|--------------|---------------|---------------|
| C | 4.0596010000 | -3.8896440000 | 0.9291340000  |
| H | 1.0001770000 | -4.1580280000 | -1.9624400000 |
| H | 4.9248560000 | -2.0812870000 | -1.8762080000 |
| H | 3.3784440000 | -4.0581790000 | 1.7870690000  |
| F | 2.2280660000 | -1.8081630000 | -0.1743520000 |

(Et<sub>3</sub>Ge)<sub>3</sub>P<sub>7</sub>

Charge = 0 Multiplicity = 1

|    |               |               |               |
|----|---------------|---------------|---------------|
| Ge | 1.0610860000  | 3.4195100000  | -0.0358480000 |
| Ge | 2.6547150000  | -2.6345920000 | -0.4241120000 |
| P  | -1.3053010000 | -1.5330400000 | 0.1705010000  |
| P  | 1.8953280000  | -0.4384280000 | 0.1802550000  |
| P  | -0.6353510000 | 1.7538110000  | 0.2973680000  |
| P  | -0.0199770000 | -0.0377550000 | -0.8753610000 |
| P  | -0.9610280000 | -1.0501120000 | 2.3291670000  |
| P  | 1.2552400000  | -0.5753600000 | 2.3224990000  |
| P  | -0.2669720000 | 1.1076490000  | 2.4095720000  |
| C  | 2.6059400000  | 3.3631520000  | 1.2343210000  |
| H  | 2.7161580000  | 4.4081730000  | 1.6003220000  |
| H  | 2.2843170000  | 2.7629910000  | 2.1123790000  |
| C  | 0.0593800000  | 5.1142130000  | 0.3003050000  |
| H  | -0.2550980000 | 5.0965910000  | 1.3668400000  |
| H  | 0.8048770000  | 5.9368600000  | 0.2155990000  |
| C  | 1.2771310000  | -3.9756750000 | -0.9381590000 |
| H  | 1.7975380000  | -4.9585970000 | -0.8751020000 |
| H  | 0.4926160000  | -3.9758940000 | -0.1527820000 |
| C  | 1.5989480000  | 3.3126540000  | -1.9539540000 |
| H  | 2.2116970000  | 2.3941540000  | -2.0730010000 |
| H  | 0.6721000000  | 3.1436330000  | -2.5427920000 |
| C  | 3.8570090000  | -2.2739170000 | -1.9760540000 |
| H  | 4.1584620000  | -3.2715360000 | -2.3688660000 |
| H  | 3.2439420000  | -1.8018030000 | -2.7739780000 |
| H  | 4.4303910000  | -4.0761080000 | 0.6331810000  |
| H  | 4.4002680000  | -2.4981470000 | 1.4510920000  |
| C  | -3.6343040000 | -0.1966140000 | -2.0892670000 |
| H  | -3.1843900000 | -1.0125280000 | -2.6948780000 |

|    |               |               |               |
|----|---------------|---------------|---------------|
| H  | -4.5212570000 | -3.3036760000 | -1.9001580000 |
| C  | 3.9338380000  | 2.8371710000  | 0.6747840000  |
| H  | 4.7265330000  | 2.8424670000  | 1.4541430000  |
| H  | 3.8326160000  | 1.7930090000  | 0.3120800000  |
| H  | 4.3050150000  | 3.4532020000  | -0.1711330000 |
| C  | 0.6545150000  | -3.7754670000 | -2.3255470000 |
| H  | -0.0807540000 | -4.5759290000 | -2.5579460000 |
| H  | 0.1134150000  | -2.8078540000 | -2.3904370000 |
| H  | 1.4164760000  | -3.7855260000 | -3.1331730000 |
| C  | -1.1418410000 | 5.3616290000  | -0.6208900000 |
| H  | -1.6703070000 | 6.3054470000  | -0.3643150000 |
| H  | -0.8382810000 | 5.4377760000  | -1.6867160000 |
| H  | -1.8837400000 | 4.5380600000  | -0.5510280000 |
| C  | 5.0887270000  | -1.4164130000 | -1.6554720000 |
| H  | 5.7063180000  | -1.2312550000 | -2.5609390000 |
| H  | 4.7985400000  | -0.4259040000 | -1.2455430000 |
| H  | 5.7479410000  | -1.9012520000 | -0.9047590000 |
| C  | 2.3492840000  | 4.5532940000  | -2.4635820000 |
| H  | 2.6268420000  | 4.4469990000  | -3.5349390000 |
| H  | 1.7355280000  | 5.4748520000  | -2.3774620000 |
| H  | 3.2904090000  | 4.7345930000  | -1.9023900000 |
| C  | -5.0456740000 | 0.1429620000  | -2.5943310000 |
| H  | -5.0339670000 | 0.4228350000  | -3.6703250000 |
| H  | -5.7452920000 | -0.7136220000 | -2.4900920000 |
| H  | -5.4897520000 | 0.9988980000  | -2.0438130000 |
| C  | 2.9649260000  | -3.9466110000 | 2.2574970000  |
| H  | 3.6470160000  | -4.3368890000 | 3.0436180000  |
| H  | 2.2984610000  | -3.2033580000 | 2.7458110000  |
| H  | 2.3284890000  | -4.7939140000 | 1.9257560000  |
| H  | -3.7271620000 | 1.6255750000  | 0.6724540000  |
| C  | -5.6516680000 | 0.7619430000  | 1.3045400000  |
| H  | -5.9036890000 | 1.5981510000  | 1.9924810000  |
| H  | -6.2122660000 | 0.9386550000  | 0.3623410000  |
| H  | -6.0601020000 | -0.1645410000 | 1.7601290000  |
| C  | 3.7494360000  | -3.3248730000 | 1.0945840000  |
| Ge | -3.5533300000 | -0.7650500000 | -0.1783360000 |

|   |               |               |               |
|---|---------------|---------------|---------------|
| C | -4.1342610000 | 0.6746730000  | 1.0763370000  |
| H | -3.6042000000 | 0.5029560000  | 2.0376780000  |
| C | -4.6538840000 | -2.4047340000 | 0.1087380000  |
| H | -4.5172750000 | -2.7065180000 | 1.1701420000  |
| H | -5.7178150000 | -2.0937260000 | 0.0135930000  |
| C | -4.3392430000 | -3.5712250000 | -0.8375770000 |
| H | -4.9664690000 | -4.4613230000 | -0.6139330000 |
| H | -3.2773840000 | -3.8860780000 | -0.7574410000 |
| H | -2.9544490000 | 0.6758880000  | -2.1938790000 |

[(Et<sub>3</sub>Ge)<sub>2</sub>P<sub>7</sub>]<sup>-</sup>

Charge = -1 Multiplicity = 1

|    |               |               |               |
|----|---------------|---------------|---------------|
| Ge | 2.9837360000  | 0.7807880000  | 0.1454530000  |
| P  | -1.8362630000 | -1.4875220000 | -0.7233740000 |
| P  | 1.2083830000  | -2.6713150000 | -1.3406670000 |
| P  | 0.6421800000  | 0.4217930000  | 0.3051790000  |
| P  | 0.1438130000  | -0.7888720000 | -1.5482870000 |
| P  | -1.2565960000 | -2.2872910000 | 1.2897970000  |
| P  | 0.8091030000  | -3.1214690000 | 0.7543590000  |
| P  | 0.6149510000  | -1.1243280000 | 1.8979330000  |
| C  | 4.2284480000  | -0.7036720000 | 0.6602500000  |
| H  | 5.0218600000  | -0.2281440000 | 1.2809640000  |
| H  | 3.6515190000  | -1.3701670000 | 1.3366610000  |
| C  | 3.3544370000  | 2.2765680000  | 1.4364960000  |
| H  | 3.1832670000  | 1.8613610000  | 2.4542820000  |
| H  | 4.4440080000  | 2.5018970000  | 1.3742720000  |
| C  | 3.3567890000  | 1.4443190000  | -1.7067550000 |
| H  | 3.2657100000  | 0.5651800000  | -2.3795500000 |
| H  | 2.5224680000  | 2.1244500000  | -1.9825790000 |
| C  | -2.7522640000 | 1.8414040000  | -1.5196070000 |
| H  | -2.9496460000 | 1.3508150000  | -2.4973130000 |
| H  | -5.3473880000 | 0.1005150000  | -2.3279330000 |
| C  | 4.8341790000  | -1.5145500000 | -0.4919920000 |
| H  | 5.5171000000  | -2.3084140000 | -0.1133820000 |
| H  | 4.0314440000  | -2.0150820000 | -1.0761930000 |
| H  | 5.4249190000  | -0.8812510000 | -1.1894880000 |



|    |               |               |               |
|----|---------------|---------------|---------------|
| C  | 2.5161900000  | 3.5434370000  | 1.2240990000  |
| H  | 2.7261210000  | 4.3242730000  | 1.9901000000  |
| H  | 2.7061030000  | 4.0031050000  | 0.2297450000  |
| H  | 1.4304580000  | 3.3127280000  | 1.2683740000  |
| C  | 4.7125460000  | 2.1432740000  | -1.8843380000 |
| H  | 4.8734680000  | 2.4804720000  | -2.9336130000 |
| H  | 4.8050940000  | 3.0428870000  | -1.2380900000 |
| H  | 5.5623090000  | 1.4745870000  | -1.6275660000 |
| C  | -3.5866300000 | 3.1215160000  | -1.3711500000 |
| H  | -3.4016720000 | 3.8387580000  | -2.2031390000 |
| H  | -4.6784230000 | 2.9108740000  | -1.3633710000 |
| H  | -3.3535600000 | 3.6603560000  | -0.4274860000 |
| H  | -1.8307260000 | 1.9325020000  | 1.5884970000  |
| C  | -3.8737490000 | 1.9108480000  | 2.4050000000  |
| H  | -3.5888200000 | 2.3236960000  | 3.3993800000  |
| H  | -4.2817970000 | 2.7568160000  | 1.8103850000  |
| H  | -4.7136510000 | 1.2046350000  | 2.5795820000  |
| Ge | -3.0484360000 | 0.4597080000  | -0.0984730000 |
| C  | -2.6818290000 | 1.2306430000  | 1.7155990000  |
| H  | -2.2900150000 | 0.3979600000  | 2.3380570000  |
| C  | -4.9818810000 | -0.0877270000 | -0.1627030000 |
| H  | -5.1287210000 | -0.8406090000 | 0.6429270000  |
| H  | -5.5968100000 | 0.7955080000  | 0.1227390000  |
| C  | -5.4342180000 | -0.6534630000 | -1.5156040000 |
| H  | -6.4950750000 | -0.9920900000 | -1.4980360000 |
| H  | -4.8097780000 | -1.5224600000 | -1.8144260000 |
| H  | -1.6650470000 | 2.0684740000  | -1.5070390000 |

Et<sub>3</sub>GeF

Charge = 0 Multiplicity = 1

|    |              |               |               |
|----|--------------|---------------|---------------|
| Ge | 2.8272640000 | -2.9281440000 | -0.5301420000 |
| C  | 1.3842440000 | -4.1622890000 | -1.0791380000 |
| H  | 1.8607730000 | -5.1354510000 | -1.3447260000 |
| H  | 0.7683750000 | -4.3570330000 | -0.1788900000 |
| C  | 4.0264320000 | -2.3957020000 | -2.0089590000 |
| H  | 4.5580410000 | -3.3077830000 | -2.3496780000 |

|   |               |               |               |
|---|---------------|---------------|---------------|
| H | 3.3879460000  | -2.0845430000 | -2.8461680000 |
| H | 4.3656030000  | -4.4317720000 | 0.8229310000  |
| H | 4.5501860000  | -2.7353330000 | 1.3182400000  |
| C | 0.5115210000  | -3.6375660000 | -2.2321910000 |
| H | -0.3084180000 | -4.3494780000 | -2.4831620000 |
| H | 0.0406580000  | -2.6641220000 | -1.9702700000 |
| H | 1.1044250000  | -3.4782540000 | -3.1656520000 |
| C | 5.0168100000  | -1.2829830000 | -1.6381040000 |
| H | 5.6345220000  | -0.9783640000 | -2.5081680000 |
| H | 4.4843320000  | -0.3741000000 | -1.2694940000 |
| H | 5.7135380000  | -1.6015430000 | -0.8406010000 |
| C | 2.8891590000  | -3.7649950000 | 2.3065290000  |
| H | 3.4772270000  | -4.0392440000 | 3.2031180000  |
| H | 2.2993420000  | -2.8651780000 | 2.5602630000  |
| H | 2.1721260000  | -4.5868780000 | 2.1251460000  |
| C | 3.7934770000  | -3.5158520000 | 1.0915390000  |
| F | 1.9884170000  | -1.4223930000 | -0.0534220000 |

(<sup>109</sup>Bu<sub>3</sub>Sn)<sub>3</sub>P<sub>7</sub>

Charge = 0 Multiplicity = 1

|    |               |               |               |
|----|---------------|---------------|---------------|
| Sn | -3.3519210000 | -1.2302530000 | -0.0464330000 |
| Sn | 3.0396010000  | -2.0688080000 | -0.2331650000 |
| P  | 1.5093910000  | 1.4970410000  | -0.6508570000 |
| P  | 0.4756020000  | -1.7136630000 | -0.5512090000 |
| P  | -1.7828910000 | 0.7877890000  | -0.5582200000 |
| P  | 0.0958340000  | 0.2162130000  | 0.4947600000  |
| P  | 0.8874150000  | 1.1214650000  | -2.7696950000 |
| P  | 0.4280250000  | -1.1021850000 | -2.7057280000 |
| P  | -1.2676550000 | 0.4059900000  | -2.7030400000 |
| Sn | 0.5792070000  | 3.8974110000  | -0.2261570000 |
| C  | 5.9343340000  | -6.8817560000 | 1.0018690000  |
| H  | 5.9413400000  | -7.9907070000 | 1.0472930000  |
| H  | 6.1487080000  | -6.5048610000 | 2.0250560000  |
| C  | 4.5971040000  | -6.3440360000 | 0.4768220000  |
| H  | 6.7803200000  | -6.5697710000 | 0.3522270000  |
| H  | 4.3911750000  | -6.7667120000 | -0.5329990000 |

|   |               |               |               |
|---|---------------|---------------|---------------|
| C | 4.5378570000  | -4.8066490000 | 0.3964570000  |
| H | 3.7660860000  | -6.7035310000 | 1.1258130000  |
| H | 5.3719360000  | -4.4518520000 | -0.2526310000 |
| H | 4.7525120000  | -4.3876680000 | 1.4069800000  |
| C | 3.1931700000  | -4.2694940000 | -0.1229750000 |
| H | 2.9784620000  | -4.6628000000 | -1.1412120000 |
| H | 2.3572020000  | -4.6158270000 | 0.5236460000  |
| C | 2.5543200000  | -1.5271100000 | 5.4621630000  |
| H | 2.9402130000  | -1.0777120000 | 6.4008740000  |
| H | 2.5959700000  | -2.6314130000 | 5.5802210000  |
| C | 3.3571720000  | -1.0635560000 | 4.2401480000  |
| H | 1.4831690000  | -1.2454280000 | 5.3732450000  |
| H | 3.3263770000  | 0.0475580000  | 4.1698410000  |
| C | 2.8586350000  | -1.6606770000 | 2.9109540000  |
| H | 4.4317920000  | -1.3251590000 | 4.3754430000  |
| H | 1.7839990000  | -1.3971980000 | 2.7783390000  |
| H | 2.8873550000  | -2.7727620000 | 2.9833930000  |
| C | 3.6603170000  | -1.1879470000 | 1.6885150000  |
| H | 3.5963900000  | -0.0848180000 | 1.5700740000  |
| H | 4.7403600000  | -1.4326390000 | 1.8056690000  |
| C | 8.0386420000  | -0.7487930000 | -2.7197810000 |
| H | 8.5692580000  | -0.3254170000 | -3.5978970000 |
| H | 8.4120260000  | -1.7852780000 | -2.5733310000 |
| C | 6.5171430000  | -0.7231090000 | -2.9120490000 |
| H | 8.3456030000  | -0.1591910000 | -1.8291560000 |
| H | 6.1777050000  | 0.3217150000  | -3.0948810000 |
| C | 5.7328380000  | -1.2996680000 | -1.7178010000 |
| H | 6.2443190000  | -1.2906010000 | -3.8308390000 |
| H | 6.0065710000  | -0.7287880000 | -0.8005840000 |
| H | 6.0805560000  | -2.3427660000 | -1.5335530000 |
| C | 4.2087530000  | -1.2714060000 | -1.9224490000 |
| H | 3.8522860000  | -0.2324880000 | -2.0890070000 |
| H | 3.9176350000  | -1.8544350000 | -2.8234270000 |
| C | -5.2059010000 | -5.9962570000 | -2.6716540000 |
| H | -5.0056180000 | -6.7963130000 | -3.4144470000 |
| H | -6.1373010000 | -5.4771120000 | -2.9849490000 |

|   |               |               |               |
|---|---------------|---------------|---------------|
| C | -4.0290430000 | -5.0185050000 | -2.5616300000 |
| H | -5.4157780000 | -6.4905570000 | -1.6986100000 |
| H | -3.1032640000 | -5.5730180000 | -2.2860610000 |
| C | -4.2573360000 | -3.8883760000 | -1.5399210000 |
| H | -3.8204090000 | -4.5662580000 | -3.5577930000 |
| H | -4.4679730000 | -4.3433980000 | -0.5444010000 |
| H | -5.1859560000 | -3.3386020000 | -1.8187460000 |
| C | -3.0705050000 | -2.9152550000 | -1.4406510000 |
| H | -2.1426080000 | -3.4366560000 | -1.1222880000 |
| H | -2.8465730000 | -2.4643580000 | -2.4323830000 |
| C | -3.6479550000 | -4.9138950000 | 4.3496930000  |
| H | -3.4352720000 | -5.1228400000 | 5.4188100000  |
| H | -3.1384100000 | -5.6979150000 | 3.7491930000  |
| C | -3.1843930000 | -3.5090330000 | 3.9442610000  |
| H | -4.7413850000 | -5.0405130000 | 4.1968640000  |
| H | -3.6839110000 | -2.7481600000 | 4.5865310000  |
| C | -3.4555930000 | -3.1719620000 | 2.4656050000  |
| H | -2.0941810000 | -3.3998030000 | 4.1446450000  |
| H | -4.5467320000 | -3.2846330000 | 2.2678440000  |
| H | -2.9565330000 | -3.9370600000 | 1.8275550000  |
| C | -2.9836060000 | -1.7644920000 | 2.0638140000  |
| H | -3.4837110000 | -0.9868960000 | 2.6824570000  |
| H | -1.8921660000 | -1.6506610000 | 2.2393950000  |
| C | -8.9535210000 | -1.1008690000 | 1.2412070000  |
| H | -9.9393470000 | -0.6091220000 | 1.1061890000  |
| H | -8.7152850000 | -1.0765260000 | 2.3264600000  |
| C | -7.8600050000 | -0.4153420000 | 0.4122880000  |
| H | -9.0716820000 | -2.1679040000 | 0.9539670000  |
| H | -8.1444490000 | -0.4216880000 | -0.6646660000 |
| C | -6.4701900000 | -1.0622710000 | 0.5661420000  |
| H | -7.7904380000 | 0.6595600000  | 0.6962560000  |
| H | -6.5437700000 | -2.1379920000 | 0.2838920000  |
| H | -6.1927340000 | -1.0581550000 | 1.6457410000  |
| C | -5.3748690000 | -0.3681070000 | -0.2616570000 |
| H | -5.6281770000 | -0.3864090000 | -1.3447660000 |
| H | -5.2943100000 | 0.7046430000  | 0.0202300000  |

|   |               |              |               |
|---|---------------|--------------|---------------|
| C | -4.1488300000 | 5.0874420000 | -3.2978750000 |
| H | -4.5871450000 | 5.5781350000 | -4.1918250000 |
| H | -4.6395520000 | 5.5263910000 | -2.4024320000 |
| C | -2.6258920000 | 5.2624580000 | -3.2446950000 |
| H | -4.4306570000 | 4.0133700000 | -3.3346510000 |
| H | -2.1680860000 | 4.8445760000 | -4.1700010000 |
| C | -1.9729870000 | 4.5956920000 | -2.0197130000 |
| H | -2.3716920000 | 6.3474520000 | -3.2484680000 |
| H | -2.2274810000 | 3.5115020000 | -2.0162280000 |
| H | -2.4382020000 | 5.0086100000 | -1.0947290000 |
| C | -0.4483790000 | 4.7740800000 | -1.9702890000 |
| H | 0.0292550000  | 4.3470750000 | -2.8790080000 |
| H | -0.1760550000 | 5.8538850000 | -1.9545970000 |
| C | 5.5000040000  | 4.7094110000 | 2.6119070000  |
| H | 6.4194770000  | 5.3147040000 | 2.7539860000  |
| H | 5.8174860000  | 3.6704510000 | 2.3782080000  |
| C | 4.6079210000  | 5.2838990000 | 1.5041880000  |
| H | 4.9670740000  | 4.6790080000 | 3.5866800000  |
| H | 4.3370770000  | 6.3367720000 | 1.7480010000  |
| C | 3.3184200000  | 4.4755140000 | 1.2677620000  |
| H | 5.1808220000  | 5.3367030000 | 0.5501530000  |
| H | 2.7496100000  | 4.4193600000 | 2.2251210000  |
| H | 3.5915010000  | 3.4224640000 | 1.0248220000  |
| C | 2.4235830000  | 5.0481490000 | 0.1580010000  |
| H | 2.1079650000  | 6.0880460000 | 0.4018690000  |
| H | 2.9794790000  | 5.1098660000 | -0.8036760000 |
| C | -2.0513640000 | 6.6988380000 | 4.0100410000  |
| H | -2.6883850000 | 6.6578160000 | 4.9180140000  |
| H | -2.5607310000 | 7.3591030000 | 3.2754270000  |
| C | -1.8025130000 | 5.3013220000 | 3.4288910000  |
| H | -1.0985770000 | 7.1957060000 | 4.2937330000  |
| H | -1.3266710000 | 4.6523280000 | 4.1989950000  |
| C | -0.9193760000 | 5.3061280000 | 2.1661940000  |
| H | -2.7747820000 | 4.8148920000 | 3.1872260000  |
| H | 0.0493360000  | 5.8010040000 | 2.4097590000  |
| H | -1.3992500000 | 5.9569530000 | 1.3984290000  |

|   |               |              |              |
|---|---------------|--------------|--------------|
| C | -0.6686600000 | 3.9019000000 | 1.5913000000 |
| H | -0.1665960000 | 3.2507510000 | 2.3394820000 |
| H | -1.6225280000 | 3.3971120000 | 1.3273320000 |

$[(^n\text{Bu}_3\text{Sn})_2\text{P}_7]^-$

Charge = -1 Multiplicity = 1

|    |               |               |               |
|----|---------------|---------------|---------------|
| Sn | -2.7199890000 | -0.2010410000 | -0.0436550000 |
| P  | 2.3602420000  | 1.8297170000  | 0.1728590000  |
| P  | -0.7132210000 | 3.1363400000  | -0.0060590000 |
| P  | -0.1632660000 | -0.3252920000 | 0.3030480000  |
| P  | 0.4087430000  | 1.4987080000  | -0.9038610000 |
| P  | 1.7147120000  | 1.7989090000  | 2.3162250000  |
| P  | -0.3529610000 | 2.7558700000  | 2.1091290000  |
| P  | -0.1503000000 | 0.4708090000  | 2.3812890000  |
| Sn | 3.5750140000  | -0.4409530000 | 0.2051780000  |
| C  | -7.4930340000 | 2.4037640000  | 1.9072440000  |
| H  | -7.9832350000 | 2.9726090000  | 2.7260380000  |
| H  | -8.0963450000 | 1.4862400000  | 1.7314280000  |
| C  | -6.0352570000 | 2.0609330000  | 2.2415870000  |
| H  | -7.5617620000 | 3.0214260000  | 0.9854590000  |
| H  | -5.4667410000 | 2.9955620000  | 2.4491220000  |
| C  | -5.3097750000 | 1.2750860000  | 1.1319180000  |
| H  | -5.9955330000 | 1.4726370000  | 3.1871640000  |
| H  | -5.3544900000 | 1.8689900000  | 0.1901720000  |
| H  | -5.8857980000 | 0.3432440000  | 0.9217300000  |
| C  | -3.8488570000 | 0.9463570000  | 1.4748930000  |
| H  | -3.2603160000 | 1.8729310000  | 1.6431680000  |
| H  | -3.7877780000 | 0.3534990000  | 2.4146500000  |
| C  | -6.6816750000 | -4.4251120000 | 0.0658610000  |
| H  | -6.8994010000 | -5.5105430000 | 0.1592700000  |
| H  | -7.0867000000 | -4.0871450000 | -0.9129050000 |
| C  | -5.1805660000 | -4.1285520000 | 0.1820130000  |
| H  | -7.2602340000 | -3.9001300000 | 0.8569260000  |
| H  | -4.7972900000 | -4.5112320000 | 1.1558760000  |
| C  | -4.8264330000 | -2.6335060000 | 0.0593890000  |
| H  | -4.6244280000 | -4.6963400000 | -0.5991000000 |

|   |               |               |               |
|---|---------------|---------------|---------------|
| H | -5.3916490000 | -2.0719310000 | 0.8395280000  |
| H | -5.2188790000 | -2.2558080000 | -0.9146600000 |
| C | -3.3248280000 | -2.3325000000 | 0.1796240000  |
| H | -2.9377380000 | -2.6736890000 | 1.1657850000  |
| H | -2.7523530000 | -2.9032550000 | -0.5861100000 |
| C | -4.0544980000 | 3.5084600000  | -4.2853130000 |
| H | -4.1999740000 | 3.6756800000  | -5.3741990000 |
| H | -3.2313200000 | 4.1742240000  | -3.9489600000 |
| C | -3.7433310000 | 2.0398210000  | -3.9664110000 |
| H | -4.9791720000 | 3.8467950000  | -3.7687110000 |
| H | -4.5694210000 | 1.3910120000  | -4.3422640000 |
| C | -3.5217630000 | 1.7692440000  | -2.4669330000 |
| H | -2.8347940000 | 1.7212340000  | -4.5273070000 |
| H | -4.4217080000 | 2.1102460000  | -1.9044350000 |
| H | -2.6881590000 | 2.4058690000  | -2.0923020000 |
| C | -3.2287860000 | 0.2977610000  | -2.1450030000 |
| H | -4.0914460000 | -0.3515920000 | -2.4206870000 |
| H | -2.3617820000 | -0.0625460000 | -2.7420340000 |
| C | 1.3555980000  | -5.6024710000 | 1.5183150000  |
| H | 1.0528230000  | -6.3241370000 | 2.3069990000  |
| H | 2.0974170000  | -6.1133390000 | 0.8658830000  |
| C | 1.9300510000  | -4.3103230000 | 2.1141220000  |
| H | 0.4595460000  | -5.3944910000 | 0.8949840000  |
| H | 1.1751570000  | -3.8372830000 | 2.7820850000  |
| C | 2.3638080000  | -3.2789390000 | 1.0553860000  |
| H | 2.7997880000  | -4.5534170000 | 2.7684240000  |
| H | 1.4819570000  | -3.0205380000 | 0.4256710000  |
| H | 3.1033760000  | -3.7571830000 | 0.3703170000  |
| C | 2.9402850000  | -1.9907820000 | 1.6567120000  |
| H | 2.1919470000  | -1.5029750000 | 2.3188650000  |
| H | 3.8358780000  | -2.2067490000 | 2.2828060000  |
| C | 1.3864860000  | -2.3962180000 | -4.7938410000 |
| H | 1.5807910000  | -2.7406380000 | -5.8322490000 |
| H | 0.7211910000  | -1.5083930000 | -4.8528060000 |
| C | 2.6850810000  | -2.0666520000 | -4.0455590000 |
| H | 0.8149970000  | -3.1972300000 | -4.2768390000 |

|   |              |               |               |
|---|--------------|---------------|---------------|
| H | 3.3470200000 | -2.9642610000 | -4.0299650000 |
| C | 2.4592800000 | -1.5764520000 | -2.6027570000 |
| H | 3.2524090000 | -1.2888200000 | -4.6076230000 |
| H | 1.8847470000 | -2.3498700000 | -2.0442080000 |
| H | 1.7950050000 | -0.6821410000 | -2.6222530000 |
| C | 3.7583640000 | -1.2456170000 | -1.8544060000 |
| H | 4.4128950000 | -2.1452180000 | -1.7838180000 |
| H | 4.3443050000 | -0.4837620000 | -2.4169870000 |
| C | 8.3902590000 | 2.6119900000  | -0.5758640000 |
| H | 9.4117790000 | 2.8793880000  | -0.2301700000 |
| H | 7.7884850000 | 3.5461040000  | -0.5961750000 |
| C | 7.7388610000 | 1.5507490000  | 0.3211910000  |
| H | 8.4756890000 | 2.2566440000  | -1.6259900000 |
| H | 8.3799960000 | 0.6388750000  | 0.3493410000  |
| C | 6.3163220000 | 1.1546680000  | -0.1176320000 |
| H | 7.7018410000 | 1.9206600000  | 1.3716800000  |
| H | 6.3564750000 | 0.8001120000  | -1.1745140000 |
| H | 5.6763340000 | 2.0668730000  | -0.1391810000 |
| C | 5.6588450000 | 0.0879670000  | 0.7695270000  |
| H | 6.2568440000 | -0.8526800000 | 0.7657580000  |
| H | 5.6226350000 | 0.4322200000  | 1.8273510000  |

<sup>n</sup>Bu<sub>3</sub>SnF

Charge = 0 Multiplicity = 1

|    |               |              |               |
|----|---------------|--------------|---------------|
| Sn | -3.1253460000 | 3.2317340000 | -0.3232650000 |
| F  | -2.1336030000 | 1.5769990000 | 0.1278980000  |
| C  | -1.3591230000 | 8.4325730000 | -1.9761830000 |
| H  | -0.5077120000 | 9.1019830000 | -2.2183260000 |
| H  | -1.9381040000 | 8.9134560000 | -1.1584340000 |
| C  | -0.8809210000 | 7.0315000000 | -1.5760450000 |
| H  | -2.0188700000 | 8.3971180000 | -2.8698570000 |
| H  | -0.2730860000 | 6.5916470000 | -2.3993470000 |
| C  | -2.0253260000 | 6.0610770000 | -1.2290120000 |
| H  | -0.1927620000 | 7.1035150000 | -0.7031130000 |
| H  | -2.7144050000 | 5.9946400000 | -2.1032270000 |
| H  | -2.6337010000 | 6.5059920000 | -0.4071620000 |



|   |               |               |               |
|---|---------------|---------------|---------------|
| C | -1.5395880000 | 4.6572750000  | -0.8289390000 |
| H | -0.9450780000 | 4.1955990000  | -1.6476340000 |
| H | -0.8638270000 | 4.7083400000  | 0.0528730000  |
| C | -3.1518520000 | 3.8968410000  | 5.3268320000  |
| H | -3.7280620000 | 4.0728090000  | 6.2589510000  |
| H | -2.3655190000 | 4.6798860000  | 5.2680210000  |
| C | -4.0566840000 | 3.9181610000  | 4.0883820000  |
| H | -2.6351390000 | 2.9189590000  | 5.4326960000  |
| H | -4.8563920000 | 3.1498520000  | 4.1942710000  |
| C | -3.3004470000 | 3.6714460000  | 2.7703110000  |
| H | -4.5877380000 | 4.8958230000  | 4.0269390000  |
| H | -2.7670270000 | 2.6960680000  | 2.8317880000  |
| H | -2.4999140000 | 4.4402070000  | 2.6647430000  |
| C | -4.2069290000 | 3.6852210000  | 1.5273100000  |
| H | -5.0151570000 | 2.9262980000  | 1.6180360000  |
| H | -4.7139290000 | 4.6691250000  | 1.4111710000  |
| C | -3.6649930000 | 0.6732810000  | -5.3758340000 |
| H | -4.3253250000 | 0.3205190000  | -6.1951930000 |
| H | -3.1322670000 | -0.2134610000 | -4.9704430000 |
| C | -4.4581610000 | 1.3963990000  | -4.2799720000 |
| H | -2.8988470000 | 1.3390910000  | -5.8282240000 |
| H | -5.0090850000 | 2.2587950000  | -4.7208570000 |
| C | -3.5828020000 | 1.8984840000  | -3.1173370000 |
| H | -5.2421460000 | 0.7172420000  | -3.8735780000 |
| H | -2.7979690000 | 2.5777330000  | -3.5243290000 |
| H | -3.0296900000 | 1.0378580000  | -2.6779230000 |
| C | -4.3769410000 | 2.6179530000  | -2.0134100000 |
| H | -4.8987530000 | 3.5154890000  | -2.4143400000 |
| H | -5.1687840000 | 1.9554740000  | -1.5992400000 |

(Me<sub>3</sub>Si)<sub>3</sub>As<sub>7</sub>

Charge = 0 Multiplicity = 1

|    |              |              |               |
|----|--------------|--------------|---------------|
| As | 0.8856410000 | 0.1249830000 | -0.9161920000 |
| As | 2.8222650000 | 1.0787410000 | 0.2566120000  |
| As | 2.1511300000 | 0.8977120000 | 2.6275220000  |
| Si | 2.5878190000 | 3.4746740000 | -0.1208780000 |

|    |               |               |               |
|----|---------------|---------------|---------------|
| C  | 2.0207870000  | 3.7317510000  | -1.9149830000 |
| H  | 2.6779590000  | 3.1980130000  | -2.6323730000 |
| H  | 2.0496090000  | 4.8148660000  | -2.1653560000 |
| H  | 0.9814760000  | 3.3736720000  | -2.0666050000 |
| C  | 4.3560470000  | 4.1399230000  | 0.0954690000  |
| H  | 4.7290650000  | 3.9715930000  | 1.1274910000  |
| H  | 4.3815200000  | 5.2345190000  | -0.0991920000 |
| H  | 5.0632940000  | 3.6500060000  | -0.6056270000 |
| C  | 1.4280250000  | 4.3700150000  | 1.0811840000  |
| H  | 0.3866240000  | 4.0011660000  | 0.9840330000  |
| H  | 1.4360330000  | 5.4601440000  | 0.8607720000  |
| H  | 1.7466610000  | 4.2305690000  | 2.1350370000  |
| As | -0.8820660000 | 1.2976250000  | 0.3259890000  |
| As | -0.3355940000 | 0.7478690000  | 2.6725740000  |
| Si | -2.8479990000 | -0.0935390000 | -0.0377640000 |
| C  | -2.8291690000 | -0.6665050000 | -1.8479740000 |
| H  | -2.7111860000 | 0.1869740000  | -2.5472740000 |
| H  | -3.7871500000 | -1.1766730000 | -2.0901720000 |
| H  | -2.0030390000 | -1.3832200000 | -2.0351470000 |
| C  | -4.3010120000 | 1.1008980000  | 0.2437380000  |
| H  | -4.3186250000 | 1.4798440000  | 1.2871170000  |
| H  | -5.2662970000 | 0.5813550000  | 0.0563780000  |
| H  | -4.2449200000 | 1.9768540000  | -0.4353200000 |
| C  | -3.0187040000 | -1.5755940000 | 1.1307810000  |
| H  | -2.1816110000 | -2.2909400000 | 0.9970340000  |
| H  | -3.9720370000 | -2.1069830000 | 0.9162040000  |
| H  | -3.0357020000 | -1.2578680000 | 2.1939480000  |
| As | 0.7797780000  | -2.0198990000 | 0.2775350000  |
| As | 1.0374640000  | -1.3307640000 | 2.6354470000  |
| Si | 2.9579980000  | -3.0190840000 | -0.1596070000 |
| C  | 3.3896560000  | -2.6946180000 | -1.9803080000 |
| H  | 2.5723860000  | -3.0168520000 | -2.6583210000 |
| H  | 4.3064070000  | -3.2599480000 | -2.2569140000 |
| H  | 3.5842350000  | -1.6174090000 | -2.1627120000 |
| C  | 2.6658990000  | -4.8783360000 | 0.1119080000  |
| H  | 2.3748860000  | -5.0954320000 | 1.1610240000  |

|   |              |               |               |
|---|--------------|---------------|---------------|
| H | 3.5967590000 | -5.4467540000 | -0.1054940000 |
| H | 1.8645190000 | -5.2659040000 | -0.5508990000 |
| C | 4.3603760000 | -2.4338310000 | 0.9731920000  |
| H | 4.5574240000 | -1.3500610000 | 0.8427740000  |
| H | 5.2906910000 | -2.9914080000 | 0.7264440000  |
| H | 4.1248870000 | -2.6164970000 | 2.0421610000  |

[(Me<sub>3</sub>Si)<sub>2</sub>As<sub>7</sub>]<sup>-</sup>

Charge = -1 Multiplicity = 1

|    |               |               |               |
|----|---------------|---------------|---------------|
| As | 1.0909120000  | 0.2883870000  | -0.8209150000 |
| As | 2.8226940000  | 1.3428700000  | 0.4456950000  |
| As | 2.1343080000  | 0.8025890000  | 2.6786340000  |
| As | -0.8195480000 | 1.3372180000  | 0.3887280000  |
| As | -0.3805600000 | 0.6811590000  | 2.7229840000  |
| Si | -2.7449290000 | -0.0475480000 | -0.0734230000 |
| C  | -2.6897290000 | -0.6146970000 | -1.8950070000 |
| H  | -2.5420990000 | 0.2460670000  | -2.5806110000 |
| H  | -3.6362590000 | -1.1270650000 | -2.1782160000 |
| H  | -1.8488100000 | -1.3213870000 | -2.0538320000 |
| C  | -4.2601970000 | 1.1067580000  | 0.1300020000  |
| H  | -4.3395860000 | 1.4752050000  | 1.1749690000  |
| H  | -5.2054320000 | 0.5737960000  | -0.1187150000 |
| H  | -4.1791590000 | 1.9946890000  | -0.5321580000 |
| C  | -3.0429870000 | -1.5660370000 | 1.0359330000  |
| H  | -2.2012020000 | -2.2844860000 | 0.9527790000  |
| H  | -3.9827620000 | -2.0818500000 | 0.7356720000  |
| H  | -3.1304000000 | -1.2684530000 | 2.1017210000  |
| As | 0.7258790000  | -1.9609240000 | 0.2295030000  |
| As | 0.9581110000  | -1.4383030000 | 2.6086950000  |
| Si | 2.8793320000  | -2.9851270000 | -0.1252860000 |
| C  | 3.3482490000  | -2.7602930000 | -1.9616950000 |
| H  | 2.5374940000  | -3.1126380000 | -2.6336800000 |
| H  | 4.2725250000  | -3.3306580000 | -2.2041730000 |
| H  | 3.5320600000  | -1.6881360000 | -2.1832400000 |
| C  | 2.6488760000  | -4.8578860000 | 0.1977450000  |
| H  | 2.3522780000  | -5.0422520000 | 1.2521410000  |

|   |              |               |               |
|---|--------------|---------------|---------------|
| H | 3.5943260000 | -5.4133400000 | 0.0057910000  |
| H | 1.8573870000 | -5.2853660000 | -0.4537450000 |
| C | 4.3015470000 | -2.3534160000 | 0.9607350000  |
| H | 4.3926990000 | -1.2513220000 | 0.8423410000  |
| H | 5.2607200000 | -2.8380680000 | 0.6705200000  |
| H | 4.1112620000 | -2.5624860000 | 2.0341080000  |

(Et<sub>3</sub>Ge)<sub>3</sub>As<sub>7</sub>

Charge = 0 Multiplicity = 1

|    |               |               |               |
|----|---------------|---------------|---------------|
| Ge | 1.2480300000  | 3.6434100000  | -0.3743620000 |
| Ge | 2.5533360000  | -2.8898980000 | -0.8131710000 |
| As | -1.4667020000 | -1.5792230000 | -0.1166860000 |
| As | 2.0961610000  | -0.5113100000 | -0.1504000000 |
| As | -0.6032600000 | 2.0123800000  | 0.0758800000  |
| As | -0.0189890000 | 0.0414940000  | -1.2698010000 |
| As | -1.0449640000 | -1.0756050000 | 2.2636730000  |
| As | 1.4148810000  | -0.7031550000 | 2.2160690000  |
| As | -0.1363510000 | 1.2416800000  | 2.3771370000  |
| C  | 2.3707380000  | 4.0766360000  | 1.2196530000  |
| H  | 2.8549400000  | 5.0476170000  | 0.9677850000  |
| H  | 1.6750130000  | 4.2923440000  | 2.0593980000  |
| C  | 0.2488880000  | 5.3111600000  | -0.8409080000 |
| H  | -0.3428720000 | 5.5957080000  | 0.0565360000  |
| H  | 1.0127340000  | 6.1105660000  | -0.9705170000 |
| C  | 1.3079080000  | -3.6214900000 | -2.1897850000 |
| H  | 1.6009740000  | -4.6911560000 | -2.2953620000 |
| H  | 0.2853730000  | -3.6181760000 | -1.7551990000 |
| C  | 2.3740460000  | 3.0779470000  | -1.9223520000 |
| H  | 2.8804300000  | 2.1323410000  | -1.6338260000 |
| H  | 1.6891160000  | 2.8187950000  | -2.7581420000 |
| C  | 4.3865110000  | -2.7746400000 | -1.6028700000 |
| H  | 4.6021100000  | -3.7801350000 | -2.0308420000 |
| H  | 4.3392280000  | -2.0745110000 | -2.4649020000 |
| H  | 3.2594990000  | -4.9897960000 | 0.3845930000  |
| H  | 3.2256200000  | -3.6454660000 | 1.5471000000  |
| C  | -3.8097500000 | 0.1072300000  | -2.2964280000 |

|   |               |               |               |
|---|---------------|---------------|---------------|
| H | -3.4420500000 | -0.7069610000 | -2.9576860000 |
| H | -4.8759970000 | -2.9826560000 | -2.2484600000 |
| C | 3.4216090000  | 3.0383550000  | 1.6293180000  |
| H | 4.0210250000  | 3.3896530000  | 2.4972290000  |
| H | 2.9553610000  | 2.0743770000  | 1.9224680000  |
| H | 4.1333490000  | 2.8182380000  | 0.8060330000  |
| C | 1.3279000000  | -2.9150230000 | -3.5513250000 |
| H | 0.6393030000  | -3.4054300000 | -4.2732990000 |
| H | 1.0067950000  | -1.8544280000 | -3.4670800000 |
| H | 2.3388420000  | -2.9182640000 | -4.0109480000 |
| C | -0.6525450000 | 5.2092340000  | -2.0780590000 |
| H | -1.1927420000 | 6.1606640000  | -2.2753870000 |
| H | -0.0736330000 | 4.9672340000  | -2.9946450000 |
| H | -1.4212530000 | 4.4156510000  | -1.9576600000 |
| C | 5.4874830000  | -2.3508540000 | -0.6210630000 |
| H | 6.4812040000  | -2.2916550000 | -1.1160380000 |
| H | 5.2807520000  | -1.3505120000 | -0.1833070000 |
| H | 5.5869790000  | -3.0640630000 | 0.2245840000  |
| C | 3.3923460000  | 4.1448210000  | -2.3532460000 |
| H | 4.0142670000  | 3.7922430000  | -3.2049140000 |
| H | 2.9008760000  | 5.0859700000  | -2.6796080000 |
| H | 4.0907260000  | 4.4083950000  | -1.5306700000 |
| C | -5.1908510000 | 0.5998060000  | -2.7563210000 |
| H | -5.1677520000 | 0.9409590000  | -3.8144400000 |
| H | -5.9630600000 | -0.1958180000 | -2.6897610000 |
| H | -5.5494170000 | 1.4572890000  | -2.1491120000 |
| C | 1.2905040000  | -4.6399920000 | 1.2795530000  |
| H | 1.4291020000  | -5.3610340000 | 2.1142380000  |
| H | 0.6653410000  | -3.8080920000 | 1.6671060000  |
| H | 0.6981670000  | -5.1550870000 | 0.4947090000  |
| H | -3.7210980000 | 1.7619120000  | 0.5808440000  |
| C | -5.7153690000 | 1.0336040000  | 1.1574780000  |
| H | -5.8923680000 | 1.8315410000  | 1.9114320000  |
| H | -6.2527620000 | 1.3378980000  | 0.2345740000  |
| H | -6.2114500000 | 0.1158200000  | 1.5377440000  |
| C | 2.6371850000  | -4.1383640000 | 0.7438220000  |

|    |               |               |               |
|----|---------------|---------------|---------------|
| Ge | -3.7443470000 | -0.5810290000 | -0.4219010000 |
| C  | -4.2113730000 | 0.8241970000  | 0.9198990000  |
| H  | -3.7037290000 | 0.5454290000  | 1.8684070000  |
| C  | -4.9887230000 | -2.1324340000 | -0.2166100000 |
| H  | -4.9096740000 | -2.4766580000 | 0.8378370000  |
| H  | -6.0192730000 | -1.7278190000 | -0.3300820000 |
| C  | -4.7518050000 | -3.2952360000 | -1.1898670000 |
| H  | -5.4633010000 | -4.1308070000 | -1.0122710000 |
| H  | -3.7259740000 | -3.7099630000 | -1.0911850000 |
| H  | -3.0571350000 | 0.9220780000  | -2.3644510000 |

[(Et<sub>3</sub>Ge)<sub>2</sub>As<sub>7</sub>]<sup>-</sup>

Charge = -1 Multiplicity = 1

|    |               |               |               |
|----|---------------|---------------|---------------|
| Ge | 3.2945590000  | 0.8259530000  | -0.0587020000 |
| Ge | -3.0748070000 | 1.5857440000  | 0.0146900000  |
| As | -1.3923710000 | -2.1270250000 | 1.7028180000  |
| As | -0.6579970000 | 1.1221840000  | -0.3377640000 |
| As | 1.9841920000  | -1.1133870000 | 0.7801630000  |
| As | -0.0815680000 | -0.1323360000 | 1.7582740000  |
| As | -1.1139530000 | -2.7895260000 | -0.5870750000 |
| As | -0.8503850000 | -0.6824020000 | -1.9717810000 |
| As | 1.1620870000  | -2.0433540000 | -1.3537060000 |
| C  | 2.9955660000  | 1.2984280000  | -1.9820680000 |
| H  | 3.1367470000  | 0.3565430000  | -2.5555820000 |
| H  | 1.9184170000  | 1.5536520000  | -2.0777150000 |
| C  | 5.2254310000  | 0.2862950000  | 0.1309400000  |
| H  | 5.3933220000  | -0.5485800000 | -0.5849040000 |
| H  | 5.8557370000  | 1.1322480000  | -0.2264410000 |
| C  | -3.4267000000 | 2.0563460000  | 1.9301720000  |
| H  | -4.4922760000 | 2.3780380000  | 1.9858730000  |
| H  | -3.3494970000 | 1.1114730000  | 2.5090920000  |
| C  | 2.9727300000  | 2.4117730000  | 1.1327130000  |
| H  | 1.9960600000  | 2.8379800000  | 0.8172100000  |
| H  | 2.8085620000  | 2.0132030000  | 2.1570270000  |
| C  | -3.4465500000 | 3.2411520000  | -1.0667460000 |
| H  | -4.4995300000 | 3.5378920000  | -0.8526930000 |

|   |               |               |               |
|---|---------------|---------------|---------------|
| H | -2.8032420000 | 4.0549570000  | -0.6659940000 |
| H | -5.1910970000 | 0.7654250000  | -1.1394780000 |
| H | -3.8867970000 | -0.4366880000 | -1.3343870000 |
| C | 3.8769750000  | 2.4205390000  | -2.5498430000 |
| H | 3.6828110000  | 2.5860320000  | -3.6340100000 |
| H | 3.6926330000  | 3.3910440000  | -2.0413670000 |
| H | 4.9619280000  | 2.2003460000  | -2.4469360000 |
| C | -2.5010550000 | 3.1273040000  | 2.5215290000  |
| H | -2.7614350000 | 3.3639530000  | 3.5779550000  |
| H | -1.4431490000 | 2.7886140000  | 2.5152270000  |
| H | -2.5456790000 | 4.0813690000  | 1.9529240000  |
| C | 5.6315550000  | -0.1330200000 | 1.5503380000  |
| H | 6.6948500000  | -0.4593890000 | 1.6081830000  |
| H | 5.5058820000  | 0.6983490000  | 2.2776800000  |
| H | 5.0037390000  | -0.9746800000 | 1.9141050000  |
| C | -3.2222180000 | 3.0783000000  | -2.5761750000 |
| H | -3.4278410000 | 4.0166120000  | -3.1399930000 |
| H | -2.1738640000 | 2.7818080000  | -2.7963860000 |
| H | -3.8745240000 | 2.2883790000  | -3.0073940000 |
| C | 4.0692710000  | 3.4875000000  | 1.1430580000  |
| H | 3.8244010000  | 4.3198170000  | 1.8417180000  |
| H | 5.0520860000  | 3.0781490000  | 1.4622620000  |
| H | 4.2212900000  | 3.9428810000  | 0.1413610000  |
| C | -5.0149710000 | -0.6595760000 | 0.5219780000  |
| H | -5.7370970000 | -1.3994400000 | 0.1083750000  |
| H | -4.2264900000 | -1.2293550000 | 1.0620960000  |
| H | -5.5651210000 | -0.0493380000 | 1.2708600000  |
| C | -4.4022140000 | 0.2045100000  | -0.5877180000 |

(<sup>n</sup>Bu<sub>3</sub>Sn)<sub>3</sub>As<sub>7</sub>

Charge = 0 Multiplicity = 1

|    |               |               |               |
|----|---------------|---------------|---------------|
| Sn | -3.5810840000 | -1.1999540000 | 0.1954450000  |
| Sn | 3.0871480000  | -2.3124930000 | 0.0283210000  |
| As | 1.7104710000  | 1.5129700000  | -0.3933880000 |
| As | 0.4319050000  | -1.9687380000 | -0.3195160000 |
| As | -1.9441110000 | 0.8826920000  | -0.3140250000 |

|    |               |               |               |
|----|---------------|---------------|---------------|
| As | 0.0897200000  | 0.1590720000  | 0.8597160000  |
| As | 1.0013260000  | 1.1651780000  | -2.7308110000 |
| As | 0.4306640000  | -1.2628960000 | -2.6847500000 |
| As | -1.3854160000 | 0.4437710000  | -2.6738440000 |
| Sn | 0.7528490000  | 3.9927050000  | 0.0819900000  |
| C  | 6.0172000000  | -7.0862040000 | 1.3630100000  |
| H  | 6.0317380000  | -8.1941270000 | 1.4280010000  |
| H  | 6.2154200000  | -6.6898610000 | 2.3821350000  |
| C  | 4.6831500000  | -6.5675940000 | 0.8112960000  |
| H  | 6.8694180000  | -6.7791840000 | 0.7191660000  |
| H  | 4.4942820000  | -7.0080500000 | -0.1942780000 |
| C  | 4.6131500000  | -5.0320510000 | 0.7055780000  |
| H  | 3.8461760000  | -6.9233970000 | 1.4546720000  |
| H  | 5.4544460000  | -4.6808910000 | 0.0640280000  |
| H  | 4.8090560000  | -4.5959410000 | 1.7125820000  |
| C  | 3.2728200000  | -4.5137410000 | 0.1566830000  |
| H  | 3.0820900000  | -4.9181370000 | -0.8620940000 |
| H  | 2.4295090000  | -4.8673200000 | 0.7900160000  |
| C  | 2.6579680000  | -1.7640720000 | 5.7337690000  |
| H  | 3.0472340000  | -1.3063620000 | 6.6670530000  |
| H  | 2.7163680000  | -2.8673080000 | 5.8546510000  |
| C  | 3.4413820000  | -1.2930630000 | 4.5019820000  |
| H  | 1.5819980000  | -1.4978280000 | 5.6555040000  |
| H  | 3.3941080000  | -0.1826740000 | 4.4286050000  |
| C  | 2.9380500000  | -1.9015110000 | 3.1796910000  |
| H  | 4.5209390000  | -1.5389240000 | 4.6267570000  |
| H  | 1.8577510000  | -1.6543480000 | 3.0593760000  |
| H  | 2.9818570000  | -3.0128300000 | 3.2558190000  |
| C  | 3.7195410000  | -1.4230170000 | 1.9466710000  |
| H  | 3.6438690000  | -0.3199580000 | 1.8302510000  |
| H  | 4.8034760000  | -1.6552270000 | 2.0526740000  |
| C  | 8.1360530000  | -1.1190740000 | -2.4318980000 |
| H  | 8.6826900000  | -0.6999130000 | -3.3021900000 |
| H  | 8.4732370000  | -2.1700370000 | -2.3018430000 |
| C  | 6.6166380000  | -1.0378570000 | -2.6255130000 |
| H  | 8.4613020000  | -0.5550310000 | -1.5312780000 |



|   |                |               |               |
|---|----------------|---------------|---------------|
| H | 6.3138850000   | 0.0210620000  | -2.7912850000 |
| C | 5.8108770000   | -1.6068840000 | -1.4418840000 |
| H | 6.3260770000   | -1.5801990000 | -3.5540460000 |
| H | 6.1049480000   | -1.0628490000 | -0.5146750000 |
| H | 6.1200960000   | -2.6648710000 | -1.2759150000 |
| C | 4.2888340000   | -1.5203170000 | -1.6442380000 |
| H | 3.9710820000   | -0.4653330000 | -1.7901270000 |
| H | 3.9772660000   | -2.0718390000 | -2.5584110000 |
| C | -5.5690230000  | -5.9782300000 | -2.3021450000 |
| H | -5.3941740000  | -6.8059470000 | -3.0206890000 |
| H | -6.4861000000  | -5.4422120000 | -2.6289380000 |
| C | -4.3642630000  | -5.0319000000 | -2.2246500000 |
| H | -5.7899370000  | -6.4364740000 | -1.3140300000 |
| H | -3.4537580000  | -5.6046020000 | -1.9354680000 |
| C | -4.5564630000  | -3.8656320000 | -1.2364620000 |
| H | -4.1465840000  | -4.6159900000 | -3.2347320000 |
| H | -4.7738680000  | -4.2846330000 | -0.2268470000 |
| H | -5.4718050000  | -3.3001330000 | -1.5271960000 |
| C | -3.3458610000  | -2.9192060000 | -1.1709870000 |
| H | -2.4295220000  | -3.4578880000 | -0.8464270000 |
| H | -3.1197060000  | -2.5021460000 | -2.1768420000 |
| C | -4.1029090000  | -4.8509670000 | 4.6141680000  |
| H | -3.9070280000  | -5.0620340000 | 5.6861050000  |
| H | -3.6339370000  | -5.6667170000 | 4.0229540000  |
| C | -3.5616140000  | -3.4768930000 | 4.1996050000  |
| H | -5.2008760000  | -4.9195620000 | 4.4568050000  |
| H | -4.0218590000  | -2.6846470000 | 4.8332630000  |
| C | -3.8062340000  | -3.1364280000 | 2.7170800000  |
| H | -2.4680060000  | -3.4255090000 | 4.4050700000  |
| H | -4.9010130000  | -3.1849390000 | 2.5145140000  |
| H | -3.3510860000  | -3.9351980000 | 2.0874410000  |
| C | -3.2489310000  | -1.7626350000 | 2.3078310000  |
| H | -3.6969230000  | -0.9542460000 | 2.9272170000  |
| H | -2.1523600000  | -1.7186970000 | 2.4849750000  |
| C | -9.1864460000  | -0.9893620000 | 1.4949650000  |
| H | -10.1683350000 | -0.4931340000 | 1.3479730000  |

|   |               |               |               |
|---|---------------|---------------|---------------|
| H | -8.9474560000 | -0.9398840000 | 2.5791900000  |
| C | -8.0876750000 | -0.3338570000 | 0.6488370000  |
| H | -9.3134550000 | -2.0622720000 | 1.2345810000  |
| H | -8.3724220000 | -0.3657930000 | -0.4276170000 |
| C | -6.7027810000 | -0.9873640000 | 0.8193620000  |
| H | -8.0099520000 | 0.7474810000  | 0.9050060000  |
| H | -6.7847330000 | -2.0694320000 | 0.5655950000  |
| H | -6.4247120000 | -0.9568810000 | 1.8983100000  |
| C | -5.6023060000 | -0.3240740000 | -0.0264130000 |
| H | -5.8601470000 | -0.3630560000 | -1.1081400000 |
| H | -5.5122970000 | 0.7542020000  | 0.2309440000  |
| C | -3.9612690000 | 5.4236380000  | -2.9169870000 |
| H | -4.3912920000 | 5.9586710000  | -3.7892540000 |
| H | -4.4339230000 | 5.8428760000  | -2.0026110000 |
| C | -2.4336550000 | 5.5546020000  | -2.8683580000 |
| H | -4.2734480000 | 4.3598690000  | -2.9906360000 |
| H | -1.9931010000 | 5.1591920000  | -3.8118080000 |
| C | -1.7912890000 | 4.8263000000  | -1.6729710000 |
| H | -2.1496670000 | 6.6315960000  | -2.8342660000 |
| H | -2.0806510000 | 3.7509250000  | -1.7051560000 |
| H | -2.2371430000 | 5.2205170000  | -0.7304830000 |
| C | -0.2617900000 | 4.9553040000  | -1.6292880000 |
| H | 0.1953900000  | 4.5450440000  | -2.5560360000 |
| H | 0.0428040000  | 6.0254240000  | -1.5807790000 |
| C | 5.6316680000  | 4.8056750000  | 3.0066610000  |
| H | 6.5442660000  | 5.4162550000  | 3.1690810000  |
| H | 5.9606120000  | 3.7711590000  | 2.7689720000  |
| C | 4.7532320000  | 5.3836450000  | 1.8898290000  |
| H | 5.0832820000  | 4.7625990000  | 3.9723540000  |
| H | 4.4706740000  | 6.4322620000  | 2.1386540000  |
| C | 3.4733510000  | 4.5686640000  | 1.6254590000  |
| H | 5.3409250000  | 5.4494060000  | 0.9456360000  |
| H | 2.8911050000  | 4.4982200000  | 2.5738130000  |
| H | 3.7587850000  | 3.5197190000  | 1.3771560000  |
| C | 2.5907460000  | 5.1459690000  | 0.5082590000  |
| H | 2.2662110000  | 6.1818850000  | 0.7573940000  |

|   |               |              |               |
|---|---------------|--------------|---------------|
| H | 3.1612730000  | 5.2207980000 | -0.4439500000 |
| C | -1.8865350000 | 6.7876350000 | 4.3213960000  |
| H | -2.5301320000 | 6.7467230000 | 5.2247450000  |
| H | -2.3850470000 | 7.4567700000 | 3.5873470000  |
| C | -1.6458710000 | 5.3915870000 | 3.7331970000  |
| H | -0.9314340000 | 7.2744710000 | 4.6145390000  |
| H | -1.1810150000 | 4.7337430000 | 4.5025330000  |
| C | -0.7542620000 | 5.3965040000 | 2.4764250000  |
| H | -2.6208140000 | 4.9153060000 | 3.4821490000  |
| H | 0.2175100000  | 5.8804780000 | 2.7293860000  |
| H | -1.2225730000 | 6.0570090000 | 1.7098980000  |
| C | -0.5115870000 | 3.9948210000 | 1.8921430000  |
| H | -0.0203020000 | 3.3344060000 | 2.6397610000  |
| H | -1.4700270000 | 3.5014160000 | 1.6213760000  |

$[(^n\text{Bu}_3\text{Sn})_2\text{As}_7]^-$

Charge = -1 Multiplicity = 1

|    |               |               |               |
|----|---------------|---------------|---------------|
| Sn | -3.3419360000 | 0.0208260000  | -0.2613180000 |
| Sn | 3.0388590000  | 0.9881060000  | 0.3582600000  |
| As | 1.8957520000  | -2.3175720000 | -1.7145140000 |
| As | 0.4011440000  | 0.5331240000  | 0.4226180000  |
| As | -1.7517220000 | -1.8559620000 | -1.3103010000 |
| As | 0.2990670000  | -0.5395390000 | -1.8309380000 |
| As | 1.3405870000  | -3.2847020000 | 0.4084640000  |
| As | 0.5275890000  | -1.4103830000 | 1.9059560000  |
| As | -1.1209160000 | -2.9505600000 | 0.8056010000  |
| C  | 6.3506070000  | 5.1218330000  | 2.6400650000  |
| H  | 6.4497740000  | 5.9820620000  | 3.3361820000  |
| H  | 6.6339790000  | 5.4795740000  | 1.6262010000  |
| C  | 4.9323930000  | 4.5358250000  | 2.6490390000  |
| H  | 7.1045680000  | 4.3618500000  | 2.9401460000  |
| H  | 4.6626290000  | 4.2214750000  | 3.6835300000  |
| C  | 4.7450470000  | 3.3369920000  | 1.6982820000  |
| H  | 4.1974690000  | 5.3288720000  | 2.3790630000  |
| H  | 5.4844580000  | 2.5481980000  | 1.9739590000  |
| H  | 5.0285950000  | 3.6554920000  | 0.6676120000  |
| C  | 3.3255830000  | 2.7505010000  | 1.6946780000  |

|   |               |               |               |
|---|---------------|---------------|---------------|
| H | 3.0344110000  | 2.4295340000  | 2.7202640000  |
| H | 2.5833590000  | 3.5233620000  | 1.3940800000  |
| C | 2.5083730000  | 4.2806020000  | -4.3302680000 |
| H | 2.9032800000  | 4.5828050000  | -5.3238650000 |
| H | 2.4553270000  | 5.1951770000  | -3.6999680000 |
| C | 3.3753680000  | 3.1981620000  | -3.6733200000 |
| H | 1.4660250000  | 3.9252610000  | -4.4788590000 |
| H | 3.4365050000  | 2.3102990000  | -4.3430860000 |
| C | 2.8617640000  | 2.7438980000  | -2.2937850000 |
| H | 4.4224030000  | 3.5674950000  | -3.5699360000 |
| H | 1.8186060000  | 2.3683940000  | -2.4063830000 |
| H | 2.7887850000  | 3.6356580000  | -1.6271670000 |
| C | 3.7263580000  | 1.6575960000  | -1.6390500000 |
| H | 3.7632710000  | 0.7473960000  | -2.2753140000 |
| H | 4.7767710000  | 2.0106670000  | -1.5167260000 |
| C | 7.3527320000  | -2.7504120000 | -0.3140950000 |
| H | 8.0006780000  | -3.5387960000 | 0.1256050000  |
| H | 8.0183040000  | -1.9441240000 | -0.6934720000 |
| C | 6.3393970000  | -2.2067910000 | 0.7021670000  |
| H | 6.8388580000  | -3.1916800000 | -1.1949170000 |
| H | 5.7118840000  | -3.0419650000 | 1.0878270000  |
| C | 5.4136000000  | -1.1182160000 | 0.1264980000  |
| H | 6.8791360000  | -1.8014150000 | 1.5899990000  |
| H | 4.8560460000  | -1.5416040000 | -0.7411030000 |
| H | 6.0431280000  | -0.2937930000 | -0.2846320000 |
| C | 4.4050490000  | -0.5687670000 | 1.1442950000  |
| H | 3.7570540000  | -1.3861110000 | 1.5283490000  |
| H | 4.9242300000  | -0.1234150000 | 2.0237310000  |
| C | -5.6240980000 | 1.2311310000  | 4.9056890000  |
| H | -5.4648330000 | 1.3551190000  | 5.9981060000  |
| H | -6.3848330000 | 0.4318050000  | 4.7688040000  |
| C | -4.3197410000 | 0.8932980000  | 4.1714970000  |
| H | -6.0706960000 | 2.1756180000  | 4.5249140000  |
| H | -3.5661220000 | 1.6921390000  | 4.3578970000  |
| C | -4.4906540000 | 0.7120960000  | 2.6503340000  |
| H | -3.8778290000 | -0.0361050000 | 4.5972570000  |

|   |               |               |               |
|---|---------------|---------------|---------------|
| H | -4.9375040000 | 1.6442590000  | 2.2315190000  |
| H | -5.2498060000 | -0.0850310000 | 2.4720580000  |
| C | -3.1815350000 | 0.3733380000  | 1.9224870000  |
| H | -2.4265260000 | 1.1775220000  | 2.0583010000  |
| H | -2.7203070000 | -0.5464050000 | 2.3447000000  |
| C | -3.6093850000 | 5.7695280000  | -0.4982010000 |
| H | -3.4558900000 | 6.7008370000  | -1.0840690000 |
| H | -2.9804540000 | 5.8431310000  | 0.4152980000  |
| C | -3.2624420000 | 4.5163410000  | -1.3130280000 |
| H | -4.6702320000 | 5.7560530000  | -0.1650120000 |
| H | -3.8788710000 | 4.4899500000  | -2.2412760000 |
| C | -3.4599140000 | 3.1979280000  | -0.5400960000 |
| H | -2.2053600000 | 4.5746750000  | -1.6586580000 |
| H | -4.5184510000 | 3.1442240000  | -0.1921310000 |
| H | -2.8434910000 | 3.2352820000  | 0.3874630000  |
| C | -3.1009880000 | 1.9433060000  | -1.3502530000 |
| H | -3.7213780000 | 1.8776770000  | -2.2723530000 |
| H | -2.0423590000 | 1.9852580000  | -1.6850820000 |
| C | -8.9447550000 | 1.0855840000  | -1.2163430000 |
| H | -9.9560610000 | 0.6887810000  | -1.4487570000 |
| H | -8.6741630000 | 1.8015970000  | -2.0225770000 |
| C | -7.9028270000 | -0.0342780000 | -1.0928930000 |
| H | -9.0245470000 | 1.6702000000  | -0.2740280000 |
| H | -8.2192940000 | -0.7563780000 | -0.3054460000 |
| C | -6.4819510000 | 0.4686240000  | -0.7697870000 |
| H | -7.8705400000 | -0.6221750000 | -2.0389840000 |
| H | -6.5195550000 | 1.0510150000  | 0.1801430000  |
| H | -6.1807050000 | 1.2037800000  | -1.5520610000 |
| C | -5.4314940000 | -0.6479770000 | -0.6659150000 |
| H | -5.7094550000 | -1.3728690000 | 0.1320130000  |
| H | -5.3948820000 | -1.2335340000 | -1.6114560000 |

#### 6.4. Optimised Structures BP86/SV(p) Level of Theory for HIA calculations

B(C<sub>6</sub>F<sub>5</sub>)<sub>3</sub>

Charge = 0 Multiplicity = 1

|   |               |               |               |
|---|---------------|---------------|---------------|
| B | -0.1531740000 | 0.4666880000  | -0.1571150000 |
| C | -0.5934870000 | 1.3637820000  | -1.3742430000 |
| C | -0.1079390000 | -1.0994570000 | -0.3181920000 |
| C | 0.2408290000  | 1.1287850000  | 1.2159520000  |
| C | -0.0324160000 | -3.9375360000 | -0.6161290000 |
| C | 0.4129910000  | -3.1094450000 | -1.6626570000 |
| C | 0.3574730000  | -1.7171430000 | -1.5010100000 |
| C | -0.5343990000 | -1.9731600000 | 0.7083660000  |
| C | -0.5146630000 | -3.3696020000 | 0.5772810000  |
| F | 0.0030740000  | -5.2606340000 | -0.7550970000 |
| F | 0.8792690000  | -3.6538160000 | -2.7891410000 |
| F | 0.8046300000  | -0.9684080000 | -2.5225490000 |
| F | -1.0156790000 | -1.4785000000 | 1.8607370000  |
| F | -0.9456400000 | -4.1599010000 | 1.5634640000  |
| C | 0.9497970000  | 2.3233350000  | 3.7105370000  |
| C | 1.6610960000  | 1.2047720000  | 3.2409850000  |
| C | 1.2913990000  | 0.6259710000  | 2.0185200000  |
| C | -0.4359970000 | 2.2606300000  | 1.7269600000  |
| C | -0.1096870000 | 2.8544980000  | 2.9539960000  |
| F | 1.2797400000  | 2.8801740000  | 4.8725090000  |
| F | 2.6729720000  | 0.7111010000  | 3.9581240000  |
| F | 2.0114880000  | -0.4299320000 | 1.6073640000  |
| F | -1.4644400000 | 2.7964460000  | 1.0514890000  |
| F | -0.7878770000 | 3.9098860000  | 3.4095480000  |
| C | -1.3748140000 | 2.9632760000  | -3.5726670000 |
| C | -2.0217000000 | 1.7569770000  | -3.3284360000 |
| C | -1.6181230000 | 0.9796550000  | -2.2517330000 |
| C | 0.0186790000  | 2.5937840000  | -1.6592780000 |
| C | -0.3452560000 | 3.3860540000  | -2.7391020000 |
| F | -1.7381680000 | 3.7070780000  | -4.5945040000 |
| F | -3.0063680000 | 1.3667580000  | -4.1186080000 |
| F | -2.2788050000 | -0.1603680000 | -2.0528190000 |
| F | 1.0207800000  | 3.0365140000  | -0.9000130000 |
| F | 0.2713940000  | 4.5287500000  | -2.9835370000 |

[HB(C<sub>6</sub>F<sub>5</sub>)<sub>3</sub>]<sup>-</sup>

Charge = -1 Multiplicity = 1

|   |               |               |               |
|---|---------------|---------------|---------------|
| B | -0.8351440000 | 0.4097510000  | 0.1454970000  |
| C | -0.9128380000 | 1.2985030000  | -1.2384890000 |
| C | -0.3821490000 | -1.1441140000 | -0.1514660000 |
| C | 0.0158010000  | 1.1509140000  | 1.3427450000  |
| C | 0.2564940000  | -3.8744060000 | -0.6694120000 |
| C | 0.8865760000  | -2.8594650000 | -1.3782350000 |
| C | 0.5605020000  | -1.5319060000 | -1.1030320000 |
| C | -0.9783850000 | -2.2019970000 | 0.5364870000  |
| C | -0.6826410000 | -3.5452400000 | 0.2992220000  |
| F | 0.5559290000  | -5.1569520000 | -0.9138370000 |
| F | 1.8029000000  | -3.1718720000 | -2.3057280000 |
| F | 1.2329190000  | -0.6071590000 | -1.8082340000 |
| F | -1.8902590000 | -1.9656980000 | 1.4924740000  |
| F | -1.2907490000 | -4.5217170000 | 0.9890550000  |
| C | 1.3043530000  | 2.5140540000  | 3.5251700000  |
| C | 1.8979470000  | 1.3863420000  | 2.9412050000  |
| C | 1.2528190000  | 0.7411730000  | 1.8689720000  |
| C | -0.5339020000 | 2.2895500000  | 1.9631380000  |
| C | 0.0725980000  | 2.9714370000  | 3.0319030000  |
| F | 1.9071620000  | 3.1500350000  | 4.5487290000  |
| F | 3.0841410000  | 0.9431720000  | 3.4049690000  |
| F | 1.9098250000  | -0.3225140000 | 1.3530720000  |
| F | -1.7163800000 | 2.7871310000  | 1.5380550000  |
| F | -0.5071170000 | 4.0553660000  | 3.5873090000  |
| C | -1.2174130000 | 2.8299100000  | -3.6512060000 |
| C | -2.1860690000 | 1.8830380000  | -3.2867370000 |
| C | -2.0130780000 | 1.1448070000  | -2.1025630000 |
| C | 0.0324660000  | 2.2508250000  | -1.6554170000 |
| C | -0.0982080000 | 3.0182200000  | -2.8273750000 |
| F | -1.3602880000 | 3.5495260000  | -4.7811440000 |
| F | -3.2647020000 | 1.6958530000  | -4.0746250000 |
| F | -2.9830680000 | 0.2495170000  | -1.8173070000 |
| F | 1.1505860000  | 2.4744200000  | -0.9301120000 |
| F | 0.8408660000  | 3.9206490000  | -3.1769340000 |
| H | -1.9904910000 | 0.3508480000  | 0.5658520000  |

SbF<sub>5</sub>

Charge = 0 Multiplicity = 1

|    |               |               |               |
|----|---------------|---------------|---------------|
| F  | -1.9354430000 | 0.7880830000  | 0.0118850000  |
| F  | 0.1865520000  | 1.0762600000  | -1.6358360000 |
| F  | -1.0232240000 | -1.7224270000 | -0.3860040000 |
| F  | 0.2213570000  | 0.5881340000  | 1.6245680000  |
| F  | 1.5235260000  | -0.8318660000 | -0.2673920000 |
| Sb | -0.2057670000 | -0.0211940000 | -0.1292210000 |

[HSbF<sub>5</sub>]<sup>-</sup>

Charge = -1 Multiplicity = 1

|    |               |               |               |
|----|---------------|---------------|---------------|
| F  | -1.9858220000 | 0.8997830000  | 0.3130360000  |
| F  | 0.3346960000  | 1.6056330000  | -1.0594700000 |
| F  | -1.0310680000 | -1.7040220000 | 0.5537970000  |
| F  | 0.4494240000  | 0.4496570000  | 1.4417800000  |
| F  | 1.3118730000  | -0.9606060000 | -0.7175670000 |
| Sb | -0.3612480000 | -0.0442780000 | -0.2546640000 |
| H  | -1.0848550000 | -0.4851660000 | -1.7689130000 |

H<sup>-</sup>

Charge = -1 Multiplicity = 1

|   |              |              |               |
|---|--------------|--------------|---------------|
| H | 5.2740000000 | 0.7150000000 | -1.0680000000 |
|---|--------------|--------------|---------------|

Me<sub>3</sub>Si<sup>+</sup>

Charge = +1 Multiplicity = 1

|    |              |               |               |
|----|--------------|---------------|---------------|
| Si | 4.5593300000 | -1.1629140000 | 0.4317530000  |
| C  | 4.1895900000 | -1.5136870000 | 2.2040410000  |
| C  | 5.4289170000 | 0.3947850000  | -0.0352990000 |
| C  | 4.1975700000 | -2.4349380000 | -0.8534960000 |
| H  | 4.0356760000 | -0.5869410000 | 2.7940150000  |
| H  | 4.0413610000 | -1.9874920000 | -1.8565400000 |
| H  | 6.5277720000 | 0.1993070000  | 0.0282680000  |
| H  | 5.0926610000 | -3.1002390000 | -0.9299300000 |
| H  | 3.3378420000 | -3.0799270000 | -0.5787650000 |
| H  | 3.3260030000 | -2.1991290000 | 2.3269270000  |



|   |              |               |               |
|---|--------------|---------------|---------------|
| H | 5.0802930000 | -2.0317310000 | 2.6375710000  |
| H | 5.2079900000 | 1.2267050000  | 0.6645500000  |
| H | 5.2149960000 | 0.7002010000  | -1.0800960000 |

Me<sub>3</sub>SiH

Charge = 0 Multiplicity = 1

|    |              |               |               |
|----|--------------|---------------|---------------|
| Si | 4.0525710000 | -0.9204570000 | 0.3574060000  |
| C  | 4.1847450000 | -1.4995980000 | 2.1604720000  |
| C  | 5.3954250000 | 0.3656530000  | -0.0264160000 |
| C  | 4.1916850000 | -2.3984650000 | -0.8254150000 |
| H  | 4.0814320000 | -0.6470970000 | 2.8645360000  |
| H  | 4.0925040000 | -2.0769450000 | -1.8836420000 |
| H  | 6.4114740000 | -0.0636060000 | 0.1062170000  |
| H  | 2.7007650000 | -0.2742770000 | 0.1601330000  |
| H  | 5.1729510000 | -2.9077000000 | -0.7165120000 |
| H  | 3.3972710000 | -3.1483440000 | -0.6259510000 |
| H  | 3.3897840000 | -2.2354850000 | 2.4046640000  |
| H  | 5.1656490000 | -1.9832810000 | 2.3558240000  |
| H  | 5.3102770000 | 1.2472950000  | 0.6433060000  |
| H  | 5.3154660000 | 0.7293060000  | -1.0726210000 |

(Me<sub>3</sub>Ge)<sub>3</sub>P<sub>7</sub>

Charge = 0 Multiplicity = 1

|    |               |               |               |
|----|---------------|---------------|---------------|
| Ge | 1.0893750000  | 3.4626110000  | 0.1735510000  |
| Ge | 2.5645720000  | -2.6021410000 | -0.2240980000 |
| P  | -1.1788730000 | -1.5067070000 | -0.0311690000 |
| P  | 1.9612790000  | -0.3485790000 | 0.3249150000  |
| P  | -0.6308050000 | 1.8001370000  | 0.2923960000  |
| P  | 0.1391490000  | 0.0729760000  | -0.8842700000 |
| P  | -1.0639170000 | -1.0982330000 | 2.1713650000  |
| P  | 1.1284910000  | -0.5634810000 | 2.3974060000  |
| P  | -0.4443830000 | 1.0700670000  | 2.4052340000  |
| C  | 2.5301900000  | 3.2486280000  | 1.5061170000  |
| H  | 3.2484850000  | 4.0883430000  | 1.3971310000  |
| H  | 2.1179610000  | 3.2640360000  | 2.5346470000  |
| C  | 0.1293590000  | 5.1633570000  | 0.4965380000  |

|    |               |               |               |
|----|---------------|---------------|---------------|
| H  | -0.3185400000 | 5.1748510000  | 1.5105380000  |
| H  | 0.8399040000  | 6.0125350000  | 0.4170190000  |
| C  | 1.6169760000  | -3.9811810000 | 0.8231290000  |
| H  | 1.9963920000  | -4.9818430000 | 0.5269930000  |
| H  | 1.7952450000  | -3.8393630000 | 1.9076390000  |
| C  | 1.8112360000  | 3.4369940000  | -1.6667130000 |
| H  | 2.3566460000  | 2.4915320000  | -1.8568030000 |
| H  | 0.9967480000  | 3.5356030000  | -2.4116510000 |
| C  | 2.2588380000  | -2.8399570000 | -2.1630770000 |
| H  | 2.6557340000  | -3.8281380000 | -2.4766510000 |
| H  | 1.1754130000  | -2.8011040000 | -2.3919220000 |
| H  | 4.8934610000  | -3.6896990000 | -0.1013760000 |
| H  | 5.0543880000  | -1.9219820000 | -0.4175750000 |
| C  | -3.3867070000 | -0.1076320000 | -2.4065110000 |
| H  | -2.9256240000 | -0.8345860000 | -3.1043230000 |
| H  | -3.6080220000 | 1.4181070000  | 0.6912350000  |
| C  | 4.5032490000  | -2.6856200000 | 0.1668200000  |
| Ge | -3.4120990000 | -0.8231030000 | -0.5637490000 |
| C  | -4.1952330000 | 0.4788100000  | 0.6965010000  |
| H  | -4.2078360000 | 0.0678010000  | 1.7255210000  |
| C  | -4.4504220000 | -2.5079200000 | -0.5114730000 |
| H  | -4.4344810000 | -2.9469250000 | 0.5062930000  |
| H  | -5.5056620000 | -2.3032740000 | -0.7892770000 |
| H  | -2.8146420000 | 0.8405120000  | -2.4484440000 |
| H  | 0.5279380000  | -3.9307950000 | 0.6276530000  |
| H  | 2.7757810000  | -2.0503830000 | -2.7437850000 |
| H  | 4.6943900000  | -2.5112440000 | 1.2446940000  |
| H  | -4.0331090000 | -3.2483880000 | -1.2226080000 |
| H  | -4.4284250000 | 0.0887110000  | -2.7355540000 |
| H  | -5.2389330000 | 0.6969600000  | 0.3869550000  |
| H  | -0.6790160000 | 5.3051050000  | -0.2481180000 |
| H  | 2.5141440000  | 4.2865350000  | -1.7948990000 |
| H  | 3.0613850000  | 2.2900650000  | 1.3457580000  |

$[(\text{Me}_3\text{Ge})_2\text{P}_7]^-$

Charge = -1 Multiplicity = 1

|    |               |               |               |
|----|---------------|---------------|---------------|
| Ge | 1.0792570000  | 3.3467980000  | 0.2572700000  |
| Ge | 2.5273620000  | -2.5204650000 | -0.2616390000 |
| P  | -1.4134760000 | -1.4664330000 | 0.0248210000  |
| P  | 1.9329610000  | -0.2937530000 | 0.2829310000  |
| P  | -0.6691180000 | 1.7469030000  | 0.3902330000  |
| P  | -0.0256980000 | -0.0314170000 | -0.8368140000 |
| P  | -0.9944830000 | -1.1853820000 | 2.1473270000  |
| P  | 1.2265340000  | -0.6056240000 | 2.3692780000  |
| P  | -0.3937210000 | 0.9995120000  | 2.4867340000  |
| C  | 2.5689610000  | 3.2116540000  | 1.5612350000  |
| H  | 3.3030940000  | 4.0254050000  | 1.3763380000  |
| H  | 2.1814400000  | 3.3010250000  | 2.5960150000  |
| C  | 0.2109160000  | 5.1201500000  | 0.5463510000  |
| H  | -0.2318420000 | 5.1720230000  | 1.5622400000  |
| H  | 0.9540600000  | 5.9399850000  | 0.4421850000  |
| C  | 1.5550370000  | -3.9505810000 | 0.6995350000  |
| H  | 1.8692950000  | -4.9464580000 | 0.3191520000  |
| H  | 1.7617940000  | -3.8935750000 | 1.7870650000  |
| C  | 1.8254150000  | 3.3522930000  | -1.5851460000 |
| H  | 2.3447020000  | 2.3928610000  | -1.7793380000 |
| H  | 1.0135770000  | 3.4680280000  | -2.3315400000 |
| C  | 2.3030950000  | -2.7724170000 | -2.2198100000 |
| H  | 2.7054630000  | -3.7614800000 | -2.5270050000 |
| H  | 1.2268040000  | -2.7223330000 | -2.4787290000 |
| H  | 4.8366930000  | -3.7105750000 | -0.1385870000 |
| H  | 5.0574590000  | -1.9402450000 | -0.4111360000 |
| C  | 4.4715710000  | -2.7001360000 | 0.1455940000  |
| H  | 0.4673110000  | -3.8043430000 | 0.5380840000  |
| H  | 2.8370110000  | -1.9786990000 | -2.7806740000 |
| H  | 4.6528870000  | -2.5517410000 | 1.2298570000  |
| H  | -0.6006100000 | 5.2789910000  | -0.1930060000 |
| H  | 2.5468760000  | 4.1887450000  | -1.7060010000 |
| H  | 3.0703740000  | 2.2292790000  | 1.4551800000  |

Me<sub>3</sub>GeH

Charge = 0 Multiplicity = 1

|    |               |              |               |
|----|---------------|--------------|---------------|
| Ge | 1.1327170000  | 3.4765370000 | 0.2269070000  |
| C  | 2.5846630000  | 3.2241110000 | 1.5451730000  |
| H  | 3.3243040000  | 4.0472480000 | 1.4684310000  |
| H  | 2.1787240000  | 3.2147820000 | 2.5771480000  |
| C  | 0.1852740000  | 5.1770110000 | 0.5739070000  |
| H  | -0.2526280000 | 5.1802370000 | 1.5928300000  |
| H  | 0.8831130000  | 6.0356490000 | 0.4914510000  |
| C  | 1.8699510000  | 3.4716830000 | -1.6078330000 |
| H  | 2.3924460000  | 2.5162300000 | -1.8174800000 |
| H  | 1.0596400000  | 3.5960220000 | -2.3547650000 |
| H  | -0.6355590000 | 5.3229080000 | -0.1573500000 |
| H  | 2.5947350000  | 4.3015310000 | -1.7374300000 |
| H  | 3.1111630000  | 2.2639320000 | 1.3698210000  |
| H  | 0.1174580000  | 2.2981170000 | 0.3631900000  |

(Et<sub>3</sub>Ge)<sub>3</sub>P<sub>7</sub>

Charge = 0 Multiplicity = 1

|    |               |               |               |
|----|---------------|---------------|---------------|
| Ge | 1.0610860000  | 3.4195100000  | -0.0358480000 |
| Ge | 2.6547150000  | -2.6345920000 | -0.4241120000 |
| P  | -1.3053010000 | -1.5330400000 | 0.1705010000  |
| P  | 1.8953280000  | -0.4384280000 | 0.1802550000  |
| P  | -0.6353510000 | 1.7538110000  | 0.2973680000  |
| P  | -0.0199770000 | -0.0377550000 | -0.8753610000 |
| P  | -0.9610280000 | -1.0501120000 | 2.3291670000  |
| P  | 1.2552400000  | -0.5753600000 | 2.3224990000  |
| P  | -0.2669720000 | 1.1076490000  | 2.4095720000  |
| C  | 2.6059400000  | 3.3631520000  | 1.2343210000  |
| H  | 2.7161580000  | 4.4081730000  | 1.6003220000  |
| H  | 2.2843170000  | 2.7629910000  | 2.1123790000  |
| C  | 0.0593800000  | 5.1142130000  | 0.3003050000  |
| H  | -0.2550980000 | 5.0965910000  | 1.3668400000  |
| H  | 0.8048770000  | 5.9368600000  | 0.2155990000  |
| C  | 1.2771310000  | -3.9756750000 | -0.9381590000 |
| H  | 1.7975380000  | -4.9585970000 | -0.8751020000 |
| H  | 0.4926160000  | -3.9758940000 | -0.1527820000 |
| C  | 1.5989480000  | 3.3126540000  | -1.9539540000 |

|   |               |               |               |
|---|---------------|---------------|---------------|
| H | 2.2116970000  | 2.3941540000  | -2.0730010000 |
| H | 0.6721000000  | 3.1436330000  | -2.5427920000 |
| C | 3.8570090000  | -2.2739170000 | -1.9760540000 |
| H | 4.1584620000  | -3.2715360000 | -2.3688660000 |
| H | 3.2439420000  | -1.8018030000 | -2.7739780000 |
| H | 4.4303910000  | -4.0761080000 | 0.6331810000  |
| H | 4.4002680000  | -2.4981470000 | 1.4510920000  |
| C | -3.6343040000 | -0.1966140000 | -2.0892670000 |
| H | -3.1843900000 | -1.0125280000 | -2.6948780000 |
| H | -4.5212570000 | -3.3036760000 | -1.9001580000 |
| C | 3.9338380000  | 2.8371710000  | 0.6747840000  |
| H | 4.7265330000  | 2.8424670000  | 1.4541430000  |
| H | 3.8326160000  | 1.7930090000  | 0.3120800000  |
| H | 4.3050150000  | 3.4532020000  | -0.1711330000 |
| C | 0.6545150000  | -3.7754670000 | -2.3255470000 |
| H | -0.0807540000 | -4.5759290000 | -2.5579460000 |
| H | 0.1134150000  | -2.8078540000 | -2.3904370000 |
| H | 1.4164760000  | -3.7855260000 | -3.1331730000 |
| C | -1.1418410000 | 5.3616290000  | -0.6208900000 |
| H | -1.6703070000 | 6.3054470000  | -0.3643150000 |
| H | -0.8382810000 | 5.4377760000  | -1.6867160000 |
| H | -1.8837400000 | 4.5380600000  | -0.5510280000 |
| C | 5.0887270000  | -1.4164130000 | -1.6554720000 |
| H | 5.7063180000  | -1.2312550000 | -2.5609390000 |
| H | 4.7985400000  | -0.4259040000 | -1.2455430000 |
| H | 5.7479410000  | -1.9012520000 | -0.9047590000 |
| C | 2.3492840000  | 4.5532940000  | -2.4635820000 |
| H | 2.6268420000  | 4.4469990000  | -3.5349390000 |
| H | 1.7355280000  | 5.4748520000  | -2.3774620000 |
| H | 3.2904090000  | 4.7345930000  | -1.9023900000 |
| C | -5.0456740000 | 0.1429620000  | -2.5943310000 |
| H | -5.0339670000 | 0.4228350000  | -3.6703250000 |
| H | -5.7452920000 | -0.7136220000 | -2.4900920000 |
| H | -5.4897520000 | 0.9988980000  | -2.0438130000 |
| C | 2.9649260000  | -3.9466110000 | 2.2574970000  |
| H | 3.6470160000  | -4.3368890000 | 3.0436180000  |

|    |               |               |               |
|----|---------------|---------------|---------------|
| H  | 2.2984610000  | -3.2033580000 | 2.7458110000  |
| H  | 2.3284890000  | -4.7939140000 | 1.9257560000  |
| H  | -3.7271620000 | 1.6255750000  | 0.6724540000  |
| C  | -5.6516680000 | 0.7619430000  | 1.3045400000  |
| H  | -5.9036890000 | 1.5981510000  | 1.9924810000  |
| H  | -6.2122660000 | 0.9386550000  | 0.3623410000  |
| H  | -6.0601020000 | -0.1645410000 | 1.7601290000  |
| C  | 3.7494360000  | -3.3248730000 | 1.0945840000  |
| Ge | -3.5533300000 | -0.7650500000 | -0.1783360000 |
| C  | -4.1342610000 | 0.6746730000  | 1.0763370000  |
| H  | -3.6042000000 | 0.5029560000  | 2.0376780000  |
| C  | -4.6538840000 | -2.4047340000 | 0.1087380000  |
| H  | -4.5172750000 | -2.7065180000 | 1.1701420000  |
| H  | -5.7178150000 | -2.0937260000 | 0.0135930000  |
| C  | -4.3392430000 | -3.5712250000 | -0.8375770000 |
| H  | -4.9664690000 | -4.4613230000 | -0.6139330000 |
| H  | -3.2773840000 | -3.8860780000 | -0.7574410000 |
| H  | -2.9544490000 | 0.6758880000  | -2.1938790000 |

[(Et<sub>3</sub>Ge)<sub>2</sub>P<sub>7</sub>]<sup>-</sup>

Charge = -1 Multiplicity = 1

|    |               |               |               |
|----|---------------|---------------|---------------|
| Ge | 2.9837360000  | 0.7807880000  | 0.1454530000  |
| P  | -1.8362630000 | -1.4875220000 | -0.7233740000 |
| P  | 1.2083830000  | -2.6713150000 | -1.3406670000 |
| P  | 0.6421800000  | 0.4217930000  | 0.3051790000  |
| P  | 0.1438130000  | -0.7888720000 | -1.5482870000 |
| P  | -1.2565960000 | -2.2872910000 | 1.2897970000  |
| P  | 0.8091030000  | -3.1214690000 | 0.7543590000  |
| P  | 0.6149510000  | -1.1243280000 | 1.8979330000  |
| C  | 4.2284480000  | -0.7036720000 | 0.6602500000  |
| H  | 5.0218600000  | -0.2281440000 | 1.2809640000  |
| H  | 3.6515190000  | -1.3701670000 | 1.3366610000  |
| C  | 3.3544370000  | 2.2765680000  | 1.4364960000  |
| H  | 3.1832670000  | 1.8613610000  | 2.4542820000  |
| H  | 4.4440080000  | 2.5018970000  | 1.3742720000  |
| C  | 3.3567890000  | 1.4443190000  | -1.7067550000 |

|    |               |               |               |
|----|---------------|---------------|---------------|
| H  | 3.2657100000  | 0.5651800000  | -2.3795500000 |
| H  | 2.5224680000  | 2.1244500000  | -1.9825790000 |
| C  | -2.7522640000 | 1.8414040000  | -1.5196070000 |
| H  | -2.9496460000 | 1.3508150000  | -2.4973130000 |
| H  | -5.3473880000 | 0.1005150000  | -2.3279330000 |
| C  | 4.8341790000  | -1.5145500000 | -0.4919920000 |
| H  | 5.5171000000  | -2.3084140000 | -0.1133820000 |
| H  | 4.0314440000  | -2.0150820000 | -1.0761930000 |
| H  | 5.4249190000  | -0.8812510000 | -1.1894880000 |
| C  | 2.5161900000  | 3.5434370000  | 1.2240990000  |
| H  | 2.7261210000  | 4.3242730000  | 1.9901000000  |
| H  | 2.7061030000  | 4.0031050000  | 0.2297450000  |
| H  | 1.4304580000  | 3.3127280000  | 1.2683740000  |
| C  | 4.7125460000  | 2.1432740000  | -1.8843380000 |
| H  | 4.8734680000  | 2.4804720000  | -2.9336130000 |
| H  | 4.8050940000  | 3.0428870000  | -1.2380900000 |
| H  | 5.5623090000  | 1.4745870000  | -1.6275660000 |
| C  | -3.5866300000 | 3.1215160000  | -1.3711500000 |
| H  | -3.4016720000 | 3.8387580000  | -2.2031390000 |
| H  | -4.6784230000 | 2.9108740000  | -1.3633710000 |
| H  | -3.3535600000 | 3.6603560000  | -0.4274860000 |
| H  | -1.8307260000 | 1.9325020000  | 1.5884970000  |
| C  | -3.8737490000 | 1.9108480000  | 2.4050000000  |
| H  | -3.5888200000 | 2.3236960000  | 3.3993800000  |
| H  | -4.2817970000 | 2.7568160000  | 1.8103850000  |
| H  | -4.7136510000 | 1.2046350000  | 2.5795820000  |
| Ge | -3.0484360000 | 0.4597080000  | -0.0984730000 |
| C  | -2.6818290000 | 1.2306430000  | 1.7155990000  |
| H  | -2.2900150000 | 0.3979600000  | 2.3380570000  |
| C  | -4.9818810000 | -0.0877270000 | -0.1627030000 |
| H  | -5.1287210000 | -0.8406090000 | 0.6429270000  |
| H  | -5.5968100000 | 0.7955080000  | 0.1227390000  |
| C  | -5.4342180000 | -0.6534630000 | -1.5156040000 |
| H  | -6.4950750000 | -0.9920900000 | -1.4980360000 |
| H  | -4.8097780000 | -1.5224600000 | -1.8144260000 |
| H  | -1.6650470000 | 2.0684740000  | -1.5070390000 |

Et<sub>3</sub>GeH

Charge = 0 Multiplicity = 1

|    |               |              |               |
|----|---------------|--------------|---------------|
| Ge | 1.1987880000  | 3.5797640000 | -0.1387690000 |
| C  | 2.8000140000  | 3.6353940000 | 1.0418520000  |
| H  | 3.3384380000  | 4.5876740000 | 0.8406020000  |
| H  | 2.4287010000  | 3.7108030000 | 2.0876120000  |
| C  | -0.0005420000 | 5.1134500000 | 0.2739470000  |
| H  | -0.1877050000 | 5.0926920000 | 1.3701620000  |
| H  | 0.5663750000  | 6.0505190000 | 0.0796200000  |
| C  | 1.7265000000  | 3.5825880000 | -2.0596810000 |
| H  | 2.3198620000  | 2.6598500000 | -2.2414140000 |
| H  | 0.7969260000  | 3.4648670000 | -2.6585050000 |
| C  | 3.7456990000  | 2.4342380000 | 0.8901900000  |
| H  | 4.6136260000  | 2.5003630000 | 1.5819570000  |
| H  | 3.2285100000  | 1.4748230000 | 1.1050250000  |
| H  | 4.1570580000  | 2.3583260000 | -0.1389690000 |
| C  | -1.3274490000 | 5.1110290000 | -0.5002890000 |
| H  | -1.9703610000 | 5.9747970000 | -0.2231920000 |
| H  | -1.1665050000 | 5.1663040000 | -1.5980960000 |
| H  | -1.9156010000 | 4.1892430000 | -0.3040650000 |
| C  | 2.5072770000  | 4.8277970000 | -2.5071960000 |
| H  | 2.7779390000  | 4.7817030000 | -3.5845410000 |
| H  | 1.9205810000  | 5.7596530000 | -2.3605310000 |
| H  | 3.4549880000  | 4.9485260000 | -1.9403260000 |
| H  | 0.4208820000  | 2.2515970000 | 0.1426090000  |

(<sup>119</sup>Bu<sub>3</sub>Sn)<sub>3</sub>P<sub>7</sub>

Charge = 0 Multiplicity = 1

|    |               |               |               |
|----|---------------|---------------|---------------|
| Sn | -3.3518850000 | -1.2301790000 | -0.0465410000 |
| Sn | 3.0394800000  | -2.0690670000 | -0.2335600000 |
| P  | 1.5094680000  | 1.4970080000  | -0.6511450000 |
| P  | 0.4755140000  | -1.7136890000 | -0.5515430000 |
| P  | -1.7828290000 | 0.7878520000  | -0.5583130000 |
| P  | 0.0959480000  | 0.2161560000  | 0.4945170000  |
| P  | 0.8873610000  | 1.1214930000  | -2.7699490000 |



|    |               |               |               |
|----|---------------|---------------|---------------|
| P  | 0.4278700000  | -1.1021320000 | -2.7060440000 |
| P  | -1.2677360000 | 0.4061280000  | -2.7031890000 |
| Sn | 0.5792670000  | 3.8973160000  | -0.2262440000 |
| C  | 5.9329390000  | -6.8818100000 | 1.0045780000  |
| H  | 5.9398720000  | -7.9907490000 | 1.0503030000  |
| H  | 6.1466580000  | -6.5046470000 | 2.0278050000  |
| C  | 4.5960740000  | -6.3441750000 | 0.4785150000  |
| H  | 6.7793630000  | -6.5700310000 | 0.3554080000  |
| H  | 4.3908050000  | -6.7670720000 | -0.5313490000 |
| C  | 4.5369240000  | -4.8068080000 | 0.3977600000  |
| H  | 3.7646100000  | -6.7034960000 | 1.1270310000  |
| H  | 5.3714920000  | -4.4521680000 | -0.2507860000 |
| H  | 4.7508090000  | -4.3875920000 | 1.4083530000  |
| C  | 3.1926480000  | -4.2697060000 | -0.1227720000 |
| H  | 2.9785880000  | -4.6632930000 | -1.1410370000 |
| H  | 2.3562110000  | -4.6157410000 | 0.5234020000  |
| C  | 2.5557860000  | -1.5283210000 | 5.4619610000  |
| H  | 2.9415520000  | -1.0785920000 | 6.4005660000  |
| H  | 2.5984760000  | -2.6325880000 | 5.5799830000  |
| C  | 3.3578450000  | -1.0640050000 | 4.2397150000  |
| H  | 1.4843510000  | -1.2476120000 | 5.3733760000  |
| H  | 3.3260080000  | 0.0470810000  | 4.1694390000  |
| C  | 2.8594690000  | -1.6615580000 | 2.9106560000  |
| H  | 4.4327450000  | -1.3246240000 | 4.3746840000  |
| H  | 1.7845480000  | -1.3990770000 | 2.7783610000  |
| H  | 2.8892560000  | -2.7736170000 | 2.9830670000  |
| C  | 3.6603740000  | -1.1880650000 | 1.6880020000  |
| H  | 3.5956650000  | -0.0849630000 | 1.5697500000  |
| H  | 4.7406250000  | -1.4320500000 | 1.8047080000  |
| C  | 8.0386780000  | -0.7476550000 | -2.7189010000 |
| H  | 8.5694440000  | -0.3245310000 | -3.5970470000 |
| H  | 8.4126380000  | -1.7838100000 | -2.5715870000 |
| C  | 6.5172550000  | -0.7230430000 | -2.9119040000 |
| H  | 8.3448550000  | -0.1572710000 | -1.8285230000 |
| H  | 6.1772540000  | 0.3214480000  | -3.0955900000 |
| C  | 5.7327460000  | -1.2992900000 | -1.7176440000 |

|   |               |               |               |
|---|---------------|---------------|---------------|
| H | 6.2452180000  | -1.2913150000 | -3.8304450000 |
| H | 6.0057070000  | -0.7276400000 | -0.8006740000 |
| H | 6.0810180000  | -2.3420570000 | -1.5325420000 |
| C | 4.2087370000  | -1.2721030000 | -1.9229590000 |
| H | 3.8516840000  | -0.2335240000 | -2.0903860000 |
| H | 3.9183390000  | -1.8559490000 | -2.8236400000 |
| C | -5.2061840000 | -5.9958190000 | -2.6723590000 |
| H | -5.0058770000 | -6.7958740000 | -3.4151470000 |
| H | -6.1374860000 | -5.4765700000 | -2.9857730000 |
| C | -4.0292430000 | -5.0181900000 | -2.5621380000 |
| H | -5.4162530000 | -6.4901280000 | -1.6993600000 |
| H | -3.1035560000 | -5.5728050000 | -2.2864640000 |
| C | -4.2575640000 | -3.8880730000 | -1.5404180000 |
| H | -3.8204300000 | -4.5659250000 | -3.5582540000 |
| H | -4.4683470000 | -4.3431060000 | -0.5449340000 |
| H | -5.1861100000 | -3.3382230000 | -1.8193390000 |
| C | -3.0706440000 | -2.9150780000 | -1.4409860000 |
| H | -2.1428210000 | -3.4366170000 | -1.1226310000 |
| H | -2.8465970000 | -2.4640890000 | -2.4326500000 |
| C | -3.6477990000 | -4.9140830000 | 4.3493500000  |
| H | -3.4352220000 | -5.1230450000 | 5.4184860000  |
| H | -3.1381290000 | -5.6980490000 | 3.7488860000  |
| C | -3.1842930000 | -3.5091750000 | 3.9440140000  |
| H | -4.7412020000 | -5.0407760000 | 4.1963940000  |
| H | -3.6839380000 | -2.7483570000 | 4.5862490000  |
| C | -3.4553600000 | -3.1720790000 | 2.4653360000  |
| H | -2.0941110000 | -3.3998740000 | 4.1445210000  |
| H | -4.5464720000 | -3.2848260000 | 2.2674680000  |
| H | -2.9561820000 | -3.9371230000 | 1.8273160000  |
| C | -2.9834210000 | -1.7645780000 | 2.0636220000  |
| H | -3.4834680000 | -0.9870130000 | 2.6823520000  |
| H | -1.8919710000 | -1.6507310000 | 2.2391390000  |
| C | -8.9531790000 | -1.0999270000 | 1.2422440000  |
| H | -9.9389650000 | -0.6080380000 | 1.1074440000  |
| H | -8.7146720000 | -1.0755660000 | 2.3274360000  |
| C | -7.8597650000 | -0.4146090000 | 0.4130200000  |

|   |               |               |               |
|---|---------------|---------------|---------------|
| H | -9.0715740000 | -2.1669590000 | 0.9550880000  |
| H | -8.1444740000 | -0.4209740000 | -0.6638650000 |
| C | -6.4700120000 | -1.0617360000 | 0.5665740000  |
| H | -7.7899690000 | 0.6602990000  | 0.6969080000  |
| H | -6.5438300000 | -2.1374680000 | 0.2844280000  |
| H | -6.1922810000 | -1.0575870000 | 1.6461030000  |
| C | -5.3747680000 | -0.3678170000 | -0.2615280000 |
| H | -5.6282830000 | -0.3862000000 | -1.3445860000 |
| H | -5.2940110000 | 0.7049480000  | 0.0202470000  |
| C | -4.1492190000 | 5.0875940000  | -3.2972190000 |
| H | -4.5876350000 | 5.5782480000  | -4.1911400000 |
| H | -4.6397510000 | 5.5266730000  | -2.4017360000 |
| C | -2.6262560000 | 5.2624650000  | -3.2443080000 |
| H | -4.4311580000 | 4.0135460000  | -3.3338500000 |
| H | -2.1686450000 | 4.8444660000  | -4.1696570000 |
| C | -1.9732060000 | 4.5957280000  | -2.0193840000 |
| H | -2.3719500000 | 6.3474340000  | -3.2482060000 |
| H | -2.2278100000 | 3.5115650000  | -2.0157760000 |
| H | -2.4382120000 | 5.0087700000  | -1.0943500000 |
| C | -0.4485720000 | 4.7739670000  | -1.9702540000 |
| H | 0.0288500000  | 4.3468290000  | -2.8790210000 |
| H | -0.1761380000 | 5.8537450000  | -1.9547060000 |
| C | 5.4997840000  | 4.7098050000  | 2.6120300000  |
| H | 6.4192690000  | 5.3150850000  | 2.7540860000  |
| H | 5.8172450000  | 3.6707790000  | 2.3785980000  |
| C | 4.6078600000  | 5.2840930000  | 1.5040820000  |
| H | 4.9667350000  | 4.6796420000  | 3.5867450000  |
| H | 4.3370420000  | 6.3370340000  | 1.7476290000  |
| C | 3.3183450000  | 4.4757200000  | 1.2676980000  |
| H | 5.1808710000  | 5.3366550000  | 0.5500990000  |
| H | 2.7494430000  | 4.4197940000  | 2.2250160000  |
| H | 3.5914100000  | 3.4226040000  | 1.0250160000  |
| C | 2.4236250000  | 5.0481280000  | 0.1577330000  |
| H | 2.1080170000  | 6.0880880000  | 0.4013380000  |
| H | 2.9795920000  | 5.1095950000  | -0.8039180000 |
| C | -2.0506840000 | 6.6987230000  | 4.0103470000  |

|   |               |              |              |
|---|---------------|--------------|--------------|
| H | -2.6876250000 | 6.6577010000 | 4.9183760000 |
| H | -2.5600790000 | 7.3590490000 | 3.2758070000 |
| C | -1.8019690000 | 5.3012160000 | 3.4291160000 |
| H | -1.0978420000 | 7.1955240000 | 4.2939730000 |
| H | -1.3260900000 | 4.6521640000 | 4.1991480000 |
| C | -0.9189590000 | 5.3060190000 | 2.1663320000 |
| H | -2.7742920000 | 4.8148530000 | 3.1875280000 |
| H | 0.0498070000  | 5.8008300000 | 2.4098120000 |
| H | -1.3988730000 | 5.9568930000 | 1.3986350000 |
| C | -0.6683690000 | 3.9017910000 | 1.5913770000 |
| H | -0.1662350000 | 3.2506070000 | 2.3394800000 |
| H | -1.6222910000 | 3.3970500000 | 1.3275140000 |

$[(^n\text{Bu}_3\text{Sn})_2\text{P}_7]^-$

Charge = -1 Multiplicity = 1

|    |               |               |               |
|----|---------------|---------------|---------------|
| Sn | -2.7327960000 | 0.1179380000  | 0.1601200000  |
| P  | 2.2196830000  | -2.0996490000 | 0.2403190000  |
| P  | -0.9398310000 | -3.1009810000 | 0.8210800000  |
| P  | -0.1944250000 | 0.1183120000  | -0.3387700000 |
| P  | 0.3412440000  | -1.3926580000 | 1.2578420000  |
| P  | 1.4793700000  | -2.5552800000 | -1.8223010000 |
| P  | -0.6325740000 | -3.2828790000 | -1.3308480000 |
| P  | -0.2972440000 | -1.1552600000 | -2.1646670000 |
| Sn | 3.4652460000  | 0.0896560000  | -0.2996030000 |
| C  | -7.6236940000 | -1.5664770000 | -2.4130620000 |
| H  | -8.1714160000 | -2.3665990000 | -2.9554370000 |
| H  | -7.6150320000 | -0.6671160000 | -3.0669050000 |
| C  | -6.2002210000 | -1.9997130000 | -2.0380380000 |
| H  | -8.2197930000 | -1.3080130000 | -1.5106040000 |
| H  | -6.2401780000 | -2.9214350000 | -1.4139390000 |
| C  | -5.3983300000 | -0.9205320000 | -1.2839040000 |
| H  | -5.6398860000 | -2.2878830000 | -2.9564060000 |
| H  | -5.9689980000 | -0.6296940000 | -0.3705740000 |
| H  | -5.3624980000 | -0.0017080000 | -1.9148310000 |
| C  | -3.9777470000 | -1.3669620000 | -0.9085830000 |
| H  | -3.9870650000 | -2.2686760000 | -0.2599890000 |

|   |               |               |               |
|---|---------------|---------------|---------------|
| H | -3.3978690000 | -1.6540450000 | -1.8126160000 |
| C | -6.1059990000 | -1.0057360000 | 4.6745120000  |
| H | -6.2341370000 | -1.0327290000 | 5.7777950000  |
| H | -6.2765330000 | -2.0361420000 | 4.2939150000  |
| C | -4.7198170000 | -0.4859980000 | 4.2706890000  |
| H | -6.9157790000 | -0.3660370000 | 4.2602290000  |
| H | -4.5622470000 | 0.5322590000  | 4.6956190000  |
| C | -4.4937320000 | -0.4351810000 | 2.7470560000  |
| H | -3.9311550000 | -1.1255420000 | 4.7281680000  |
| H | -5.2883410000 | 0.2007170000  | 2.2897530000  |
| H | -4.6525220000 | -1.4565360000 | 2.3311260000  |
| C | -3.1024640000 | 0.0769680000  | 2.3459140000  |
| H | -2.9326710000 | 1.1072870000  | 2.7319600000  |
| H | -2.3072990000 | -0.5652450000 | 2.7801390000  |
| C | -6.3895360000 | 4.6036260000  | 0.2833910000  |
| H | -6.6527400000 | 5.6185530000  | -0.0840340000 |
| H | -6.2930560000 | 4.6643150000  | 1.3893730000  |
| C | -5.1010980000 | 4.0751100000  | -0.3612140000 |
| H | -7.2526290000 | 3.9367700000  | 0.0678080000  |
| H | -5.2149990000 | 4.0607740000  | -1.4696470000 |
| C | -4.6951390000 | 2.6673100000  | 0.1180740000  |
| H | -4.2630590000 | 4.7810410000  | -0.1582190000 |
| H | -5.5392760000 | 1.9678090000  | -0.0847190000 |
| H | -4.5936510000 | 2.6888650000  | 1.2284520000  |
| C | -3.4005480000 | 2.1369720000  | -0.5175020000 |
| H | -3.4958240000 | 2.1014320000  | -1.6262100000 |
| H | -2.5564910000 | 2.8309760000  | -0.3068580000 |
| C | 1.4925730000  | 4.4638400000  | -3.5064300000 |
| H | 1.2558560000  | 4.8563100000  | -4.5185760000 |
| H | 2.1900480000  | 5.1837120000  | -3.0243220000 |
| C | 2.0943940000  | 3.0535810000  | -3.5647690000 |
| H | 0.5513330000  | 4.4745000000  | -2.9158050000 |
| H | 1.3859810000  | 2.3651910000  | -4.0787280000 |
| C | 2.4308340000  | 2.4667280000  | -2.1807370000 |
| H | 3.0145110000  | 3.0641760000  | -4.1948140000 |
| H | 1.5002770000  | 2.4405120000  | -1.5685470000 |

|   |              |               |               |
|---|--------------|---------------|---------------|
| H | 3.1248520000 | 3.1641720000  | -1.6545160000 |
| C | 3.0326680000 | 1.0565610000  | -2.2442900000 |
| H | 2.3417240000 | 0.3657550000  | -2.7754820000 |
| H | 3.9901760000 | 1.0553150000  | -2.8132380000 |
| C | 8.0654640000 | -2.6242650000 | 1.8582820000  |
| H | 9.1228160000 | -2.9429390000 | 1.7358660000  |
| H | 7.4520390000 | -3.5416720000 | 1.9888410000  |
| C | 7.5737100000 | -1.7926290000 | 0.6658690000  |
| H | 7.9977950000 | -2.0493320000 | 2.8075350000  |
| H | 8.2284080000 | -0.8994840000 | 0.5361010000  |
| C | 6.1090080000 | -1.3319190000 | 0.7918400000  |
| H | 7.6861890000 | -2.3826040000 | -0.2728850000 |
| H | 6.0001170000 | -0.7468500000 | 1.7353970000  |
| H | 5.4574700000 | -2.2258150000 | 0.9270430000  |
| C | 5.6050660000 | -0.5066560000 | -0.4006880000 |
| H | 6.2110020000 | 0.4202090000  | -0.5259610000 |
| H | 5.7207520000 | -1.0832870000 | -1.3460910000 |
| C | 5.3345470000 | 4.5832100000  | 2.7875730000  |
| H | 5.1752660000 | 5.2699630000  | 3.6461120000  |
| H | 5.4000000000 | 5.2071280000  | 1.8696270000  |
| C | 4.2161700000 | 3.5387110000  | 2.6738070000  |
| H | 6.3269190000 | 4.1012220000  | 2.9261100000  |
| H | 4.1511980000 | 2.9531550000  | 3.6194560000  |
| C | 4.3919490000 | 2.5632330000  | 1.4935570000  |
| H | 3.2323620000 | 4.0515240000  | 2.5740890000  |
| H | 5.3811890000 | 2.0581250000  | 1.5937490000  |
| H | 4.4602290000 | 3.1573010000  | 0.5518600000  |
| C | 3.2711430000 | 1.5183350000  | 1.3835880000  |
| H | 3.2057910000 | 0.9110350000  | 2.3127150000  |
| H | 2.2797800000 | 2.0068530000  | 1.2658210000  |

<sup>119</sup>Bu<sub>3</sub>SnH

Charge = 0 Multiplicity = 1

|    |               |              |               |
|----|---------------|--------------|---------------|
| Sn | 0.4730700000  | 4.1649100000 | -0.1855330000 |
| C  | -4.0336180000 | 4.5916720000 | -3.7010130000 |
| H  | -4.5398900000 | 5.1339110000 | -4.5266550000 |

|   |               |              |               |
|---|---------------|--------------|---------------|
| H | -4.7370730000 | 4.5625230000 | -2.8411100000 |
| C | -2.7057330000 | 5.2559510000 | -3.3156870000 |
| H | -3.8800060000 | 3.5432140000 | -4.0358340000 |
| H | -2.0373630000 | 5.3032150000 | -4.2057980000 |
| C | -1.9643350000 | 4.5386560000 | -2.1722010000 |
| H | -2.8867170000 | 6.3154260000 | -3.0221490000 |
| H | -1.7890080000 | 3.4781750000 | -2.4678910000 |
| H | -2.6381060000 | 4.4888890000 | -1.2852870000 |
| C | -0.6321520000 | 5.2018880000 | -1.7841420000 |
| H | 0.0454050000  | 5.2594540000 | -2.6650150000 |
| H | -0.7984730000 | 6.2518210000 | -1.4553100000 |
| C | 5.5115720000  | 4.4408730000 | 2.5342550000  |
| H | 6.4865220000  | 4.9546510000 | 2.6666900000  |
| H | 5.7258380000  | 3.3820220000 | 2.2736320000  |
| C | 4.6536300000  | 5.1195580000 | 1.4589720000  |
| H | 4.9993750000  | 4.4393340000 | 3.5205510000  |
| H | 4.4872650000  | 6.1874200000 | 1.7298230000  |
| C | 3.2886720000  | 4.4415820000 | 1.2367440000  |
| H | 5.2082930000  | 5.1398590000 | 0.4930000000  |
| H | 2.7401550000  | 4.4165380000 | 2.2071390000  |
| H | 3.4579610000  | 3.3731010000 | 0.9674660000  |
| C | 2.4259350000  | 5.1232130000 | 0.1612190000  |
| H | 2.2368430000  | 6.1869180000 | 0.4278830000  |
| H | 2.9617800000  | 5.1420330000 | -0.8137820000 |
| C | -1.9770390000 | 6.8472090000 | 4.2600270000  |
| H | -2.5605850000 | 6.7723840000 | 5.2012100000  |
| H | -2.5363860000 | 7.5197050000 | 3.5743450000  |
| C | -1.7421580000 | 5.4701350000 | 3.6265770000  |
| H | -1.0165640000 | 7.3508240000 | 4.5029580000  |
| H | -1.2142670000 | 4.8085540000 | 4.3510300000  |
| C | -0.9341430000 | 5.5202550000 | 2.3163600000  |
| H | -2.7203890000 | 4.9749240000 | 3.4291490000  |
| H | 0.0404170000  | 6.0231510000 | 2.5173390000  |
| H | -1.4647830000 | 6.1852150000 | 1.5956720000  |
| C | -0.6937920000 | 4.1395430000 | 1.6833970000  |
| H | -0.1566290000 | 3.4729170000 | 2.3942500000  |

|   |               |              |               |
|---|---------------|--------------|---------------|
| H | -1.6614360000 | 3.6352120000 | 1.4658310000  |
| H | 0.7489130000  | 2.5051640000 | -0.6891130000 |

(Et<sub>3</sub>Ge)<sub>3</sub>As<sub>7</sub>

Charge = 0 Multiplicity = 1

|    |               |               |               |
|----|---------------|---------------|---------------|
| Ge | -1.0932100000 | 3.6830880000  | 0.3669020000  |
| Ge | -2.7448720000 | -2.7532550000 | 0.7979380000  |
| As | 1.4281310000  | -1.6412830000 | 0.1241360000  |
| As | -2.0966990000 | -0.4245970000 | 0.1365940000  |
| As | 0.6966190000  | 1.9799740000  | -0.0651100000 |
| As | 0.0327010000  | 0.0294020000  | 1.2751060000  |
| As | 1.0352530000  | -1.1227370000 | -2.2561300000 |
| As | -1.4072310000 | -0.6517080000 | -2.2239240000 |
| As | 0.2212790000  | 1.2304770000  | -2.3714920000 |
| C  | -2.2085580000 | 4.1447150000  | -1.2243450000 |
| H  | -2.6573910000 | 5.1330360000  | -0.9740840000 |
| H  | -1.5101450000 | 4.3323470000  | -2.0685790000 |
| C  | -0.0297370000 | 5.3170680000  | 0.8118530000  |
| H  | 0.5733280000  | 5.5657580000  | -0.0887180000 |
| H  | -0.7616240000 | 6.1476750000  | 0.9298590000  |
| C  | -1.3430170000 | -3.8907030000 | 1.6415080000  |
| H  | -1.7771220000 | -4.9165680000 | 1.6598280000  |
| H  | -0.4713800000 | -3.9257620000 | 0.9541960000  |
| C  | -2.2294950000 | 3.1772550000  | 1.9275540000  |
| H  | -2.7706280000 | 2.2464860000  | 1.6544410000  |
| H  | -1.5488540000 | 2.9053470000  | 2.7627770000  |
| C  | -4.2057370000 | -2.4481820000 | 2.1282960000  |
| H  | -4.4502250000 | -3.4508290000 | 2.5474770000  |
| H  | -3.7789640000 | -1.8589210000 | 2.9686420000  |
| H  | -4.2109930000 | -4.4598870000 | -0.3521150000 |
| H  | -4.1644690000 | -2.9760170000 | -1.3297610000 |
| C  | 3.8525750000  | -0.1040950000 | 2.3284440000  |
| H  | 3.4337700000  | -0.9129880000 | 2.9653550000  |
| H  | 4.8150730000  | -3.2041080000 | 2.1960660000  |
| C  | -3.2973490000 | 3.1423590000  | -1.6237650000 |
| H  | -3.8914960000 | 3.5130170000  | -2.4872410000 |



|    |               |               |               |
|----|---------------|---------------|---------------|
| H  | -2.8665880000 | 2.1628290000  | -1.9190960000 |
| H  | -4.0091460000 | 2.9471740000  | -0.7943050000 |
| C  | -0.9094180000 | -3.4591030000 | 3.0483530000  |
| H  | -0.1425050000 | -4.1466620000 | 3.4662930000  |
| H  | -0.4652150000 | -2.4401920000 | 3.0459620000  |
| H  | -1.7600630000 | -3.4439860000 | 3.7620410000  |
| C  | 0.8664880000  | 5.1975850000  | 2.0513620000  |
| H  | 1.4468350000  | 6.1283620000  | 2.2326310000  |
| H  | 0.2778980000  | 4.9968240000  | 2.9717190000  |
| H  | 1.6007010000  | 4.3699740000  | 1.9457150000  |
| C  | -5.4627760000 | -1.7668050000 | 1.5705200000  |
| H  | -6.2339220000 | -1.6178630000 | 2.3574240000  |
| H  | -5.2307480000 | -0.7668240000 | 1.1455200000  |
| H  | -5.9341120000 | -2.3643310000 | 0.7617330000  |
| C  | -3.2078780000 | 4.2839320000  | 2.3509630000  |
| H  | -3.8315880000 | 3.9660640000  | 3.2149010000  |
| H  | -2.6823560000 | 5.2137390000  | 2.6559180000  |
| H  | -3.9063400000 | 4.5567840000  | 1.5315090000  |
| C  | 5.2652850000  | 0.2786560000  | 2.7972850000  |
| H  | 5.2704800000  | 0.5757810000  | 3.8688300000  |
| H  | 5.9829250000  | -0.5624720000 | 2.6905730000  |
| H  | 5.6761020000  | 1.1354230000  | 2.2231780000  |
| C  | -2.5087110000 | -4.3568400000 | -1.7280340000 |
| H  | -3.0159520000 | -4.8734630000 | -2.5715470000 |
| H  | -1.8153000000 | -3.6116390000 | -2.1740780000 |
| H  | -1.8847840000 | -5.1138250000 | -1.2077960000 |
| H  | 3.7668300000  | 1.6277650000  | -0.5270530000 |
| C  | 5.7589270000  | 0.8808630000  | -1.0885130000 |
| H  | 5.9576080000  | 1.6873210000  | -1.8278480000 |
| H  | 6.2869780000  | 1.1642360000  | -0.1537170000 |
| H  | 6.2479950000  | -0.0378800000 | -1.4754700000 |
| C  | -3.5214830000 | -3.6982580000 | -0.7824650000 |
| Ge | 3.7406010000  | -0.7315810000 | 0.4339980000  |
| C  | 4.2489170000  | 0.6892470000  | -0.8754440000 |
| H  | 3.7507630000  | 0.4335160000  | -1.8354960000 |
| C  | 4.9218650000  | -2.3242710000 | 0.1770090000  |

|   |              |               |               |
|---|--------------|---------------|---------------|
| H | 4.8102480000 | -2.6463260000 | -0.8814730000 |
| H | 5.9691450000 | -1.9613610000 | 0.2776800000  |
| C | 4.6582860000 | -3.4938380000 | 1.1352740000  |
| H | 5.3327980000 | -4.3533990000 | 0.9299950000  |
| H | 3.6151030000 | -3.8662500000 | 1.0507570000  |
| H | 3.1558730000 | 0.7561010000  | 2.4264740000  |

[(Et<sub>3</sub>Ge)<sub>2</sub>As<sub>7</sub>]<sup>-</sup>

Charge = -1 Multiplicity = 1

|    |               |               |               |
|----|---------------|---------------|---------------|
| Ge | -3.3045950000 | 1.3758650000  | 0.0073500000  |
| As | 0.7498270000  | 0.9775210000  | 0.5284430000  |
| As | -2.1745110000 | -0.6522040000 | -0.9047730000 |
| As | 1.0143150000  | -2.1100460000 | -1.8642890000 |
| As | 0.0622470000  | 0.0763740000  | -1.7135770000 |
| As | 0.6029330000  | -1.0133070000 | 1.9388500000  |
| As | -1.6029910000 | -1.9066490000 | 1.1438990000  |
| As | 0.5289880000  | -2.9618570000 | 0.3256430000  |
| C  | -2.4328840000 | 3.1211740000  | -0.4473970000 |
| H  | -3.0447650000 | 3.9063820000  | 0.0543160000  |
| H  | -1.4364060000 | 3.1254140000  | 0.0443570000  |
| C  | -5.0947640000 | 1.3861760000  | -0.9145010000 |
| H  | -5.6008320000 | 2.3387260000  | -0.6333680000 |
| H  | -4.9025030000 | 1.4446350000  | -2.0083580000 |
| H  | -4.5316820000 | 2.1497200000  | 2.0891300000  |
| H  | -4.1902420000 | 0.4039430000  | 2.2087620000  |
| C  | 3.5535110000  | 1.8527620000  | -1.6012140000 |
| H  | 2.7328730000  | 2.5760780000  | -1.7967720000 |
| H  | 3.4362590000  | 4.2365690000  | 0.6759970000  |
| C  | -2.2925650000 | 3.4099000000  | -1.9476710000 |
| H  | -1.8224700000 | 4.4013700000  | -2.1366050000 |
| H  | -1.6550740000 | 2.6467730000  | -2.4441380000 |
| H  | -3.2750620000 | 3.4101640000  | -2.4680170000 |
| C  | -5.9860210000 | 0.1784750000  | -0.5949550000 |
| H  | -6.9512450000 | 0.2045570000  | -1.1502160000 |
| H  | -5.4786490000 | -0.7745650000 | -0.8592820000 |
| H  | -6.2344870000 | 0.1233900000  | 0.4869280000  |

|    |               |               |               |
|----|---------------|---------------|---------------|
| C  | 4.9199670000  | 2.5261630000  | -1.7983320000 |
| H  | 5.0318400000  | 2.9409590000  | -2.8260980000 |
| H  | 5.0737120000  | 3.3705350000  | -1.0921600000 |
| H  | 5.7622390000  | 1.8195900000  | -1.6420260000 |
| C  | -2.5566030000 | 1.6730040000  | 2.9163280000  |
| H  | -2.8829920000 | 1.6923920000  | 3.9808600000  |
| H  | -1.7646830000 | 0.8998830000  | 2.8274180000  |
| H  | -2.0773680000 | 2.6516930000  | 2.7006730000  |
| H  | 3.5822340000  | -1.4027300000 | -0.2686020000 |
| C  | 5.6381260000  | -0.7110570000 | 0.0944840000  |
| H  | 6.0861650000  | -1.7172890000 | 0.2589330000  |
| H  | 5.8422180000  | -0.4415740000 | -0.9638150000 |
| H  | 6.2078590000  | 0.0030010000  | 0.7292980000  |
| C  | -3.7277090000 | 1.3858830000  | 1.9689020000  |
| Ge | 3.2080310000  | 1.0527980000  | 0.2098830000  |
| C  | 4.1337180000  | -0.7062730000 | 0.4012500000  |
| H  | 3.9381060000  | -1.0550370000 | 1.4386660000  |
| C  | 3.9324930000  | 2.3025280000  | 1.6108090000  |
| H  | 3.7934140000  | 1.7912770000  | 2.5889130000  |
| H  | 5.0326390000  | 2.3853600000  | 1.4582350000  |
| C  | 3.2779490000  | 3.6902450000  | 1.6313700000  |
| H  | 3.6773650000  | 4.3358620000  | 2.4462900000  |
| H  | 2.1789910000  | 3.6112180000  | 1.7755940000  |
| H  | 3.4045870000  | 1.0261830000  | -2.3292580000 |

(<sup>n</sup>Bu<sub>3</sub>Sn)<sub>3</sub>As<sub>7</sub>

Charge = 0 Multiplicity = 1

|    |               |               |               |
|----|---------------|---------------|---------------|
| Sn | -3.5810840000 | -1.1999540000 | 0.1954450000  |
| Sn | 3.0871480000  | -2.3124930000 | 0.0283210000  |
| As | 1.7104710000  | 1.5129700000  | -0.3933880000 |
| As | 0.4319050000  | -1.9687380000 | -0.3195160000 |
| As | -1.9441110000 | 0.8826920000  | -0.3140250000 |
| As | 0.0897200000  | 0.1590720000  | 0.8597160000  |
| As | 1.0013260000  | 1.1651780000  | -2.7308110000 |
| As | 0.4306640000  | -1.2628960000 | -2.6847500000 |

|    |               |               |               |
|----|---------------|---------------|---------------|
| As | -1.3854160000 | 0.4437710000  | -2.6738440000 |
| Sn | 0.7528490000  | 3.9927050000  | 0.0819900000  |
| C  | 6.0172000000  | -7.0862040000 | 1.3630100000  |
| H  | 6.0317380000  | -8.1941270000 | 1.4280010000  |
| H  | 6.2154200000  | -6.6898610000 | 2.3821350000  |
| C  | 4.6831500000  | -6.5675940000 | 0.8112960000  |
| H  | 6.8694180000  | -6.7791840000 | 0.7191660000  |
| H  | 4.4942820000  | -7.0080500000 | -0.1942780000 |
| C  | 4.6131500000  | -5.0320510000 | 0.7055780000  |
| H  | 3.8461760000  | -6.9233970000 | 1.4546720000  |
| H  | 5.4544460000  | -4.6808910000 | 0.0640280000  |
| H  | 4.8090560000  | -4.5959410000 | 1.7125820000  |
| C  | 3.2728200000  | -4.5137410000 | 0.1566830000  |
| H  | 3.0820900000  | -4.9181370000 | -0.8620940000 |
| H  | 2.4295090000  | -4.8673200000 | 0.7900160000  |
| C  | 2.6579680000  | -1.7640720000 | 5.7337690000  |
| H  | 3.0472340000  | -1.3063620000 | 6.6670530000  |
| H  | 2.7163680000  | -2.8673080000 | 5.8546510000  |
| C  | 3.4413820000  | -1.2930630000 | 4.5019820000  |
| H  | 1.5819980000  | -1.4978280000 | 5.6555040000  |
| H  | 3.3941080000  | -0.1826740000 | 4.4286050000  |
| C  | 2.9380500000  | -1.9015110000 | 3.1796910000  |
| H  | 4.5209390000  | -1.5389240000 | 4.6267570000  |
| H  | 1.8577510000  | -1.6543480000 | 3.0593760000  |
| H  | 2.9818570000  | -3.0128300000 | 3.2558190000  |
| C  | 3.7195410000  | -1.4230170000 | 1.9466710000  |
| H  | 3.6438690000  | -0.3199580000 | 1.8302510000  |
| H  | 4.8034760000  | -1.6552270000 | 2.0526740000  |
| C  | 8.1360530000  | -1.1190740000 | -2.4318980000 |
| H  | 8.6826900000  | -0.6999130000 | -3.3021900000 |
| H  | 8.4732370000  | -2.1700370000 | -2.3018430000 |
| C  | 6.6166380000  | -1.0378570000 | -2.6255130000 |
| H  | 8.4613020000  | -0.5550310000 | -1.5312780000 |
| H  | 6.3138850000  | 0.0210620000  | -2.7912850000 |
| C  | 5.8108770000  | -1.6068840000 | -1.4418840000 |
| H  | 6.3260770000  | -1.5801990000 | -3.5540460000 |

|   |                |               |               |
|---|----------------|---------------|---------------|
| H | 6.1049480000   | -1.0628490000 | -0.5146750000 |
| H | 6.1200960000   | -2.6648710000 | -1.2759150000 |
| C | 4.2888340000   | -1.5203170000 | -1.6442380000 |
| H | 3.9710820000   | -0.4653330000 | -1.7901270000 |
| H | 3.9772660000   | -2.0718390000 | -2.5584110000 |
| C | -5.5690230000  | -5.9782300000 | -2.3021450000 |
| H | -5.3941740000  | -6.8059470000 | -3.0206890000 |
| H | -6.4861000000  | -5.4422120000 | -2.6289380000 |
| C | -4.3642630000  | -5.0319000000 | -2.2246500000 |
| H | -5.7899370000  | -6.4364740000 | -1.3140300000 |
| H | -3.4537580000  | -5.6046020000 | -1.9354680000 |
| C | -4.5564630000  | -3.8656320000 | -1.2364620000 |
| H | -4.1465840000  | -4.6159900000 | -3.2347320000 |
| H | -4.7738680000  | -4.2846330000 | -0.2268470000 |
| H | -5.4718050000  | -3.3001330000 | -1.5271960000 |
| C | -3.3458610000  | -2.9192060000 | -1.1709870000 |
| H | -2.4295220000  | -3.4578880000 | -0.8464270000 |
| H | -3.1197060000  | -2.5021460000 | -2.1768420000 |
| C | -4.1029090000  | -4.8509670000 | 4.6141680000  |
| H | -3.9070280000  | -5.0620340000 | 5.6861050000  |
| H | -3.6339370000  | -5.6667170000 | 4.0229540000  |
| C | -3.5616140000  | -3.4768930000 | 4.1996050000  |
| H | -5.2008760000  | -4.9195620000 | 4.4568050000  |
| H | -4.0218590000  | -2.6846470000 | 4.8332630000  |
| C | -3.8062340000  | -3.1364280000 | 2.7170800000  |
| H | -2.4680060000  | -3.4255090000 | 4.4050700000  |
| H | -4.9010130000  | -3.1849390000 | 2.5145140000  |
| H | -3.3510860000  | -3.9351980000 | 2.0874410000  |
| C | -3.2489310000  | -1.7626350000 | 2.3078310000  |
| H | -3.6969230000  | -0.9542460000 | 2.9272170000  |
| H | -2.1523600000  | -1.7186970000 | 2.4849750000  |
| C | -9.1864460000  | -0.9893620000 | 1.4949650000  |
| H | -10.1683350000 | -0.4931340000 | 1.3479730000  |
| H | -8.9474560000  | -0.9398840000 | 2.5791900000  |
| C | -8.0876750000  | -0.3338570000 | 0.6488370000  |
| H | -9.3134550000  | -2.0622720000 | 1.2345810000  |

|   |               |               |               |
|---|---------------|---------------|---------------|
| H | -8.3724220000 | -0.3657930000 | -0.4276170000 |
| C | -6.7027810000 | -0.9873640000 | 0.8193620000  |
| H | -8.0099520000 | 0.7474810000  | 0.9050060000  |
| H | -6.7847330000 | -2.0694320000 | 0.5655950000  |
| H | -6.4247120000 | -0.9568810000 | 1.8983100000  |
| C | -5.6023060000 | -0.3240740000 | -0.0264130000 |
| H | -5.8601470000 | -0.3630560000 | -1.1081400000 |
| H | -5.5122970000 | 0.7542020000  | 0.2309440000  |
| C | -3.9612690000 | 5.4236380000  | -2.9169870000 |
| H | -4.3912920000 | 5.9586710000  | -3.7892540000 |
| H | -4.4339230000 | 5.8428760000  | -2.0026110000 |
| C | -2.4336550000 | 5.5546020000  | -2.8683580000 |
| H | -4.2734480000 | 4.3598690000  | -2.9906360000 |
| H | -1.9931010000 | 5.1591920000  | -3.8118080000 |
| C | -1.7912890000 | 4.8263000000  | -1.6729710000 |
| H | -2.1496670000 | 6.6315960000  | -2.8342660000 |
| H | -2.0806510000 | 3.7509250000  | -1.7051560000 |
| H | -2.2371430000 | 5.2205170000  | -0.7304830000 |
| C | -0.2617900000 | 4.9553040000  | -1.6292880000 |
| H | 0.1953900000  | 4.5450440000  | -2.5560360000 |
| H | 0.0428040000  | 6.0254240000  | -1.5807790000 |
| C | 5.6316680000  | 4.8056750000  | 3.0066610000  |
| H | 6.5442660000  | 5.4162550000  | 3.1690810000  |
| H | 5.9606120000  | 3.7711590000  | 2.7689720000  |
| C | 4.7532320000  | 5.3836450000  | 1.8898290000  |
| H | 5.0832820000  | 4.7625990000  | 3.9723540000  |
| H | 4.4706740000  | 6.4322620000  | 2.1386540000  |
| C | 3.4733510000  | 4.5686640000  | 1.6254590000  |
| H | 5.3409250000  | 5.4494060000  | 0.9456360000  |
| H | 2.8911050000  | 4.4982200000  | 2.5738130000  |
| H | 3.7587850000  | 3.5197190000  | 1.3771560000  |
| C | 2.5907460000  | 5.1459690000  | 0.5082590000  |
| H | 2.2662110000  | 6.1818850000  | 0.7573940000  |
| H | 3.1612730000  | 5.2207980000  | -0.4439500000 |
| C | -1.8865350000 | 6.7876350000  | 4.3213960000  |
| H | -2.5301320000 | 6.7467230000  | 5.2247450000  |

|   |               |              |              |
|---|---------------|--------------|--------------|
| H | -2.3850470000 | 7.4567700000 | 3.5873470000 |
| C | -1.6458710000 | 5.3915870000 | 3.7331970000 |
| H | -0.9314340000 | 7.2744710000 | 4.6145390000 |
| H | -1.1810150000 | 4.7337430000 | 4.5025330000 |
| C | -0.7542620000 | 5.3965040000 | 2.4764250000 |
| H | -2.6208140000 | 4.9153060000 | 3.4821490000 |
| H | 0.2175100000  | 5.8804780000 | 2.7293860000 |
| H | -1.2225730000 | 6.0570090000 | 1.7098980000 |
| C | -0.5115870000 | 3.9948210000 | 1.8921430000 |
| H | -0.0203020000 | 3.3344060000 | 2.6397610000 |
| H | -1.4700270000 | 3.5014160000 | 1.6213760000 |

[(<sup>n</sup>Bu<sub>3</sub>Sn)<sub>2</sub>As<sub>7</sub>]<sup>-</sup>

Charge = -1 Multiplicity = 1

|    |               |               |               |
|----|---------------|---------------|---------------|
| Sn | -3.3419360000 | 0.0208260000  | -0.2613180000 |
| Sn | 3.0388590000  | 0.9881060000  | 0.3582600000  |
| As | 1.8957520000  | -2.3175710000 | -1.7145140000 |
| As | 0.4011440000  | 0.5331240000  | 0.4226180000  |
| As | -1.7517220000 | -1.8559620000 | -1.3103010000 |
| As | 0.2990670000  | -0.5395390000 | -1.8309380000 |
| As | 1.3405870000  | -3.2847020000 | 0.4084640000  |
| As | 0.5275890000  | -1.4103830000 | 1.9059560000  |
| As | -1.1209160000 | -2.9505600000 | 0.8056010000  |
| C  | 6.3506070000  | 5.1218330000  | 2.6400650000  |
| H  | 6.4497740000  | 5.9820620000  | 3.3361820000  |
| H  | 6.6339790000  | 5.4795740000  | 1.6262010000  |
| C  | 4.9323930000  | 4.5358250000  | 2.6490390000  |
| H  | 7.1045680000  | 4.3618500000  | 2.9401460000  |
| H  | 4.6626290000  | 4.2214750000  | 3.6835300000  |
| C  | 4.7450470000  | 3.3369920000  | 1.6982820000  |
| H  | 4.1974690000  | 5.3288720000  | 2.3790640000  |
| H  | 5.4844580000  | 2.5481980000  | 1.9739590000  |
| H  | 5.0285950000  | 3.6554920000  | 0.6676120000  |
| C  | 3.3255830000  | 2.7505010000  | 1.6946780000  |
| H  | 3.0344110000  | 2.4295340000  | 2.7202640000  |
| H  | 2.5833590000  | 3.5233620000  | 1.3940800000  |
| C  | 2.5083730000  | 4.2806020000  | -4.3302680000 |

|   |              |              |              |
|---|--------------|--------------|--------------|
| H | 2.903280000  | 4.582805000  | -5.323865000 |
| H | 2.455327000  | 5.195177000  | -3.699968000 |
| C | 3.375368000  | 3.198162000  | -3.673320000 |
| H | 1.466024000  | 3.925261000  | -4.478859000 |
| H | 3.436505000  | 2.310299000  | -4.343086000 |
| C | 2.861764000  | 2.743898000  | -2.293785000 |
| H | 4.422403000  | 3.567495000  | -3.569936000 |
| H | 1.818606000  | 2.368394000  | -2.406383000 |
| H | 2.788785000  | 3.635658000  | -1.627167000 |
| C | 3.726358000  | 1.657596000  | -1.639050000 |
| H | 3.763271000  | 0.747397000  | -2.275314000 |
| H | 4.776771000  | 2.010667000  | -1.516726000 |
| C | 7.352732000  | -2.750412000 | -0.314095000 |
| H | 8.000678000  | -3.538796000 | 0.125605000  |
| H | 8.018304000  | -1.944124000 | -0.693472000 |
| C | 6.339397000  | -2.206791000 | 0.702167000  |
| H | 6.838858000  | -3.191680000 | -1.194917000 |
| H | 5.711884000  | -3.041965000 | 1.087827000  |
| C | 5.413600000  | -1.118216000 | 0.126498000  |
| H | 6.879136000  | -1.801416000 | 1.589999000  |
| H | 4.856046000  | -1.541604000 | -0.741103000 |
| H | 6.043128000  | -0.293793000 | -0.284632000 |
| C | 4.405049000  | -0.568767000 | 1.144295000  |
| H | 3.757054000  | -1.386111000 | 1.528349000  |
| H | 4.924230000  | -0.123415000 | 2.023731000  |
| C | -5.624098000 | 1.231131000  | 4.905689000  |
| H | -5.464833000 | 1.355119000  | 5.998106000  |
| H | -6.384833000 | 0.431805000  | 4.768804000  |
| C | -4.319742000 | 0.893298000  | 4.171497000  |
| H | -6.070697000 | 2.175618000  | 4.524914000  |
| H | -3.566123000 | 1.692139000  | 4.357897000  |
| C | -4.490654000 | 0.712096000  | 2.650334000  |
| H | -3.877829000 | -0.036105000 | 4.597257000  |
| H | -4.937505000 | 1.644259000  | 2.231519000  |
| H | -5.249806000 | -0.085032000 | 2.472058000  |
| C | -3.181535000 | 0.373338000  | 1.922487000  |



|   |               |               |               |
|---|---------------|---------------|---------------|
| H | -2.4265270000 | 1.1775220000  | 2.0583010000  |
| H | -2.7203070000 | -0.5464050000 | 2.3447000000  |
| C | -3.6093850000 | 5.7695280000  | -0.4982010000 |
| H | -3.4558910000 | 6.7008370000  | -1.0840690000 |
| H | -2.9804550000 | 5.8431310000  | 0.4152980000  |
| C | -3.2624430000 | 4.5163410000  | -1.3130280000 |
| H | -4.6702320000 | 5.7560530000  | -0.1650120000 |
| H | -3.8788710000 | 4.4899500000  | -2.2412760000 |
| C | -3.4599150000 | 3.1979280000  | -0.5400960000 |
| H | -2.2053600000 | 4.5746750000  | -1.6586580000 |
| H | -4.5184510000 | 3.1442230000  | -0.1921310000 |
| H | -2.8434910000 | 3.2352820000  | 0.3874630000  |
| C | -3.1009880000 | 1.9433060000  | -1.3502530000 |
| H | -3.7213780000 | 1.8776770000  | -2.2723530000 |
| H | -2.0423590000 | 1.9852580000  | -1.6850820000 |
| C | -8.9447550000 | 1.0855840000  | -1.2163430000 |
| H | -9.9560610000 | 0.6887810000  | -1.4487570000 |
| H | -8.6741630000 | 1.8015970000  | -2.0225770000 |
| C | -7.9028270000 | -0.0342780000 | -1.0928930000 |
| H | -9.0245470000 | 1.6701990000  | -0.2740280000 |
| H | -8.2192940000 | -0.7563790000 | -0.3054460000 |
| C | -6.4819510000 | 0.4686240000  | -0.7697870000 |
| H | -7.8705400000 | -0.6221760000 | -2.0389840000 |
| H | -6.5195550000 | 1.0510140000  | 0.1801430000  |
| H | -6.1807050000 | 1.2037800000  | -1.5520610000 |
| C | -5.4314940000 | -0.6479770000 | -0.6659150000 |
| H | -5.7094550000 | -1.3728690000 | 0.1320130000  |
| H | -5.3948820000 | -1.2335340000 | -1.6114560000 |

**6.5. Optimised structures at the PBE1PBE/6-311G(d,p) level of theory for Compounds 6–11  
N,N,N and O,O,O tetrel coordination modes**

(Me<sub>3</sub>Ge-PhNCO)<sub>3</sub>P<sub>7</sub> – NNN

Charge = 0 Multiplicity = 1

|    |               |              |               |
|----|---------------|--------------|---------------|
| Ge | -4.7943260000 | 1.9577400000 | -0.1736020000 |
| Ge | 4.1920080000  | 3.0899180000 | -0.1656220000 |

|    |               |               |               |
|----|---------------|---------------|---------------|
| Ge | 0.6889320000  | -5.0785980000 | -0.1448510000 |
| P  | -0.5096720000 | 1.8838980000  | 1.4627480000  |
| P  | 1.8236360000  | -0.4852860000 | 1.4748730000  |
| P  | 1.2471050000  | -0.1294810000 | 3.6046320000  |
| P  | -0.5124010000 | 1.2200480000  | 3.5972360000  |
| P  | -0.0234610000 | 0.0221650000  | 0.3715100000  |
| P  | -1.3850760000 | -1.3220200000 | 1.4807450000  |
| P  | -0.8020130000 | -0.9787100000 | 3.6105790000  |
| O  | 2.9134720000  | 1.9153700000  | 2.1496780000  |
| O  | 0.0791990000  | -3.4980560000 | 2.1958260000  |
| O  | -3.1292450000 | 1.6589610000  | 2.1640790000  |
| N  | -2.8748950000 | 2.1010650000  | -0.0258480000 |
| N  | 3.2873440000  | 1.3923370000  | -0.0047200000 |
| N  | -0.3722770000 | -3.4709270000 | -0.0082030000 |
| C  | -0.7376130000 | 4.2404730000  | -2.1805250000 |
| H  | -0.3207940000 | 5.2422380000  | -2.1737130000 |
| C  | -1.5066920000 | 3.8095190000  | -1.1073490000 |
| H  | -1.6945240000 | 4.4644580000  | -0.2634000000 |
| C  | 2.3992400000  | 0.7093650000  | -2.1726560000 |
| H  | 1.7614830000  | 1.5870540000  | -2.1705480000 |
| C  | -0.5189470000 | 3.3989780000  | -3.2661630000 |
| H  | 0.0677230000  | 3.7423280000  | -4.1120080000 |
| C  | -0.2266490000 | -6.4700180000 | 0.8638060000  |
| H  | -0.5188130000 | -6.0772510000 | 1.8380950000  |
| H  | 0.4462390000  | -7.3183980000 | 1.0153110000  |
| H  | -1.1119130000 | -6.8190990000 | 0.3276120000  |
| C  | 2.4769690000  | -4.6643740000 | 0.4933730000  |
| H  | 2.8369690000  | -3.7516950000 | 0.0128420000  |
| H  | 3.1546890000  | -5.4869580000 | 0.2479320000  |
| H  | 2.4643110000  | -4.5093090000 | 1.5717300000  |
| C  | -2.5640960000 | -3.1648080000 | -1.0423170000 |
| H  | -3.0180480000 | -3.6327170000 | -0.1753680000 |
| C  | 2.3859520000  | -0.1702460000 | -3.2475560000 |
| H  | 1.7487500000  | 0.0380540000  | -4.1009800000 |
| C  | -2.3941050000 | 1.8658550000  | 1.2200750000  |
| C  | -3.3469970000 | -2.7406870000 | -2.1084220000 |

|   |               |               |               |
|---|---------------|---------------|---------------|
| H | -4.4227940000 | -2.8768140000 | -2.0714060000 |
| C | -1.8173280000 | 1.6776580000  | -2.1858540000 |
| H | -2.2161870000 | 0.6691780000  | -2.1685280000 |
| C | 4.0189590000  | -0.6854120000 | -1.0605350000 |
| H | 4.6594270000  | -0.8710860000 | -0.2050470000 |
| C | -1.3729080000 | -1.9964650000 | -3.2622470000 |
| H | -0.9015740000 | -1.5444520000 | -4.1291070000 |
| C | 3.9904520000  | -1.5707540000 | -2.1303910000 |
| H | 4.6148370000  | -2.4579090000 | -2.1097530000 |
| C | -5.5791700000 | 3.3640740000  | 0.9188600000  |
| H | -5.2663950000 | 3.2363350000  | 1.9552030000  |
| H | -6.6699860000 | 3.3122210000  | 0.8623280000  |
| H | -5.2605540000 | 4.3464400000  | 0.5628810000  |
| C | -5.1574730000 | 2.2738570000  | -2.0651020000 |
| H | -4.7655400000 | 3.2411570000  | -2.3866660000 |
| H | -6.2407790000 | 2.2731370000  | -2.2163530000 |
| H | -4.7212940000 | 1.4960740000  | -2.6945760000 |
| C | -2.0507790000 | 2.5242260000  | -1.1028830000 |
| C | 2.8765380000  | 4.4834950000  | 0.1620460000  |
| H | 2.0913840000  | 4.4478280000  | -0.5965260000 |
| H | 3.3576740000  | 5.4648040000  | 0.1276240000  |
| H | 2.4263650000  | 4.3368500000  | 1.1441320000  |
| C | 2.7672870000  | 1.1449170000  | 1.2224400000  |
| C | -5.2875730000 | 0.1547490000  | 0.3592040000  |
| H | -4.6315910000 | -0.5677540000 | -0.1316500000 |
| H | -6.3222550000 | -0.0496100000 | 0.0702930000  |
| H | -5.1790810000 | 0.0440360000  | 1.4379550000  |
| C | -1.1787640000 | -2.9968320000 | -1.0765860000 |
| C | -2.7533300000 | -2.1622910000 | -3.2253320000 |
| H | -3.3640540000 | -1.8470680000 | -4.0650370000 |
| C | 3.2220100000  | 0.4602500000  | -1.0751230000 |
| C | 5.6867140000  | 3.0885840000  | 1.0797110000  |
| H | 5.3142050000  | 2.9661790000  | 2.0964540000  |
| H | 6.2311680000  | 4.0338780000  | 1.0038580000  |
| H | 6.3753900000  | 2.2731750000  | 0.8469910000  |
| C | -0.5879120000 | -2.4026080000 | -2.1909470000 |

|   |               |               |               |
|---|---------------|---------------|---------------|
| H | 0.4855670000  | -2.2481270000 | -2.2027700000 |
| C | 0.6992790000  | -5.5004780000 | -2.0518440000 |
| H | -0.2950290000 | -5.3934890000 | -2.4898640000 |
| H | 1.0201710000  | -6.5386450000 | -2.1767040000 |
| H | 1.3922670000  | -4.8572340000 | -2.5981270000 |
| C | -0.4375730000 | -2.9508210000 | 1.2435400000  |
| C | 3.1797270000  | -1.3118960000 | -3.2306380000 |
| H | 3.1717970000  | -1.9951130000 | -4.0736850000 |
| C | 4.8350350000  | 3.1147360000  | -2.0085060000 |
| H | 5.4000870000  | 2.2089720000  | -2.2391370000 |
| H | 5.4972270000  | 3.9757070000  | -2.1369360000 |
| H | 4.0137860000  | 3.2017800000  | -2.7224110000 |
| C | -1.0616460000 | 2.1185790000  | -3.2644730000 |
| H | -0.8939830000 | 1.4544690000  | -4.1062840000 |

(Me<sub>3</sub>Ge-PhNCO)<sub>3</sub>P<sub>7</sub> – OOO

Charge = 0 Multiplicity = 1

|   |               |               |               |
|---|---------------|---------------|---------------|
| P | -1.3052580000 | 1.3782370000  | -0.7234930000 |
| P | -0.5507840000 | -1.8435240000 | -0.6730220000 |
| P | -0.5330760000 | -1.2019360000 | -2.8125590000 |
| P | -0.7139640000 | 1.0109170000  | -2.8448810000 |
| P | -0.0020940000 | 0.0017980000  | 0.4198180000  |
| P | 1.8667520000  | 0.4202770000  | -0.6921490000 |
| P | 1.2926060000  | 0.0612450000  | -2.8208560000 |
| O | -3.1341600000 | -1.5289350000 | -1.3742260000 |
| O | 2.8622260000  | -2.0065230000 | -1.3195020000 |
| O | 0.3143840000  | 3.4283670000  | -1.3908410000 |
| N | -0.3557590000 | 3.5392120000  | 0.7460140000  |
| N | -2.9102640000 | -2.0121750000 | 0.8238070000  |
| N | 3.2264650000  | -1.4741220000 | 0.8507050000  |
| C | -3.2593700000 | 2.7974970000  | 2.9181670000  |
| H | -4.3402010000 | 2.8945780000  | 2.8984470000  |
| C | -2.5173020000 | 3.1954920000  | 1.8138080000  |
| H | -3.0068380000 | 3.6111830000  | 0.9393420000  |
| C | -2.0478020000 | -1.4849150000 | 3.0210160000  |
| H | -2.5206890000 | -0.5110690000 | 2.9525240000  |

|    |               |               |               |
|----|---------------|---------------|---------------|
| C  | -2.6251770000 | 2.2854720000  | 4.0447450000  |
| H  | -3.2062770000 | 1.9825300000  | 4.9093490000  |
| C  | 3.9866140000  | 0.5580700000  | 1.9567800000  |
| H  | 4.6350880000  | 0.7643300000  | 1.1116660000  |
| C  | -1.3382320000 | -1.8484930000 | 4.1563760000  |
| H  | -1.2681490000 | -1.1493850000 | 4.9835530000  |
| C  | -0.3565910000 | 2.9627660000  | -0.3652400000 |
| C  | 3.9713880000  | 1.4017940000  | 3.0596070000  |
| H  | 4.6076660000  | 2.2810460000  | 3.0682420000  |
| C  | -0.4884370000 | 2.5724510000  | 2.9578850000  |
| H  | 0.5924320000  | 2.4802300000  | 2.9620710000  |
| C  | -1.5292400000 | -3.6195520000 | 2.0278220000  |
| H  | -1.6233730000 | -4.3118390000 | 1.1977650000  |
| C  | 2.3495660000  | -0.0135080000 | 4.1239930000  |
| H  | 1.7060350000  | -0.2444190000 | 4.9669470000  |
| C  | -0.8234630000 | -3.9763190000 | 3.1695280000  |
| H  | -0.3541470000 | -4.9534700000 | 3.2235660000  |
| C  | -1.1235040000 | 3.0798120000  | 1.8212520000  |
| C  | -2.3976100000 | -1.7975900000 | -0.3176590000 |
| C  | 3.1738280000  | -0.5794720000 | 1.9274940000  |
| C  | 3.1536710000  | 1.1215460000  | 4.1486710000  |
| H  | 3.1494710000  | 1.7780710000  | 5.0123950000  |
| C  | -2.1421150000 | -2.3656070000 | 1.9400660000  |
| C  | 2.3595550000  | -0.8631350000 | 3.0269890000  |
| H  | 1.7251280000  | -1.7427460000 | 3.0039110000  |
| C  | 2.7548490000  | -1.1896820000 | -0.2935970000 |
| C  | -0.7231300000 | -3.0938450000 | 4.2393670000  |
| H  | -0.1773780000 | -3.3775770000 | 5.1330600000  |
| C  | -1.2382050000 | 2.1750090000  | 4.0557450000  |
| H  | -0.7303790000 | 1.7776780000  | 4.9288460000  |
| Ge | 1.4601600000  | 4.8970020000  | -1.1745860000 |
| Ge | -4.9832760000 | -1.2856600000 | -1.1711950000 |
| Ge | 3.6028990000  | -3.7129560000 | -1.0860550000 |
| C  | -5.7603310000 | -2.9929210000 | -0.6660890000 |
| C  | -5.4036760000 | -0.7761930000 | -2.9986010000 |
| C  | -5.2472930000 | 0.1697140000  | 0.0881260000  |

|   |               |               |               |
|---|---------------|---------------|---------------|
| H | -5.4506680000 | -3.7695960000 | -1.3686280000 |
| H | -6.8516120000 | -2.9230220000 | -0.6855140000 |
| H | -5.4334200000 | -3.2646030000 | 0.3375930000  |
| H | -6.4654750000 | -0.5327390000 | -3.0908500000 |
| H | -5.1715020000 | -1.5912680000 | -3.6869160000 |
| H | -4.8183080000 | 0.0998920000  | -3.2857140000 |
| H | -5.2974900000 | -0.2091780000 | 1.1088040000  |
| H | -6.1699920000 | 0.7049020000  | -0.1522330000 |
| H | -4.4056490000 | 0.8626950000  | 0.0127620000  |
| C | 2.7554630000  | 4.4316360000  | 0.1938930000  |
| C | 0.3671220000  | 6.4589110000  | -0.8019860000 |
| C | 2.2259800000  | 4.9201560000  | -2.9601210000 |
| H | 3.0367020000  | 3.3822990000  | 0.0776710000  |
| H | 2.3275630000  | 4.5720820000  | 1.1861730000  |
| H | 3.6480390000  | 5.0541620000  | 0.0856150000  |
| H | -0.1279330000 | 6.3417850000  | 0.1622300000  |
| H | -0.3867120000 | 6.5865530000  | -1.5817310000 |
| H | 0.9969210000  | 7.3527060000  | -0.7782930000 |
| H | 2.7702280000  | 3.9923110000  | -3.1481890000 |
| H | 2.9171740000  | 5.7600650000  | -3.0689680000 |
| H | 1.4366810000  | 5.0185050000  | -3.7081620000 |
| C | 3.3505520000  | -4.3811440000 | -2.8929660000 |
| C | 2.5152150000  | -4.6490070000 | 0.2209970000  |
| C | 5.4759890000  | -3.4980290000 | -0.6181160000 |
| H | 2.7043730000  | -5.7242820000 | 0.1583700000  |
| H | 1.4596080000  | -4.4602600000 | 0.0130340000  |
| H | 2.7441810000  | -4.2944770000 | 1.2256810000  |
| H | 5.5635090000  | -3.0840920000 | 0.3865360000  |
| H | 5.9646780000  | -2.8261460000 | -1.3269880000 |
| H | 5.9798060000  | -4.4679520000 | -0.6565740000 |
| H | 3.8573200000  | -3.7323820000 | -3.6102070000 |
| H | 2.2871320000  | -4.4086520000 | -3.1393760000 |
| H | 3.7580800000  | -5.3911870000 | -2.9868020000 |

(Et<sub>3</sub>Ge-PhNCO)<sub>3</sub>P<sub>7</sub> – NNN

Charge = 0 Multiplicity = 1

|    |               |               |               |
|----|---------------|---------------|---------------|
| Ge | 0.0697020000  | 5.2317290000  | 0.0412610000  |
| Ge | -4.5796240000 | -2.6659510000 | 0.1652120000  |
| Ge | 4.8035070000  | -2.4798410000 | 0.0158580000  |
| P  | -1.4863690000 | 1.1933370000  | -1.4965350000 |
| P  | -0.3327940000 | -1.9198110000 | -1.4374800000 |
| P  | -0.4048810000 | -1.3029730000 | -3.5819040000 |
| P  | -0.8861340000 | 0.8619250000  | -3.6236840000 |
| P  | -0.0006820000 | -0.0088460000 | -0.3807770000 |
| P  | 1.7913520000  | 0.6279050000  | -1.5086280000 |
| P  | 1.2278850000  | 0.1971880000  | -3.6263400000 |
| O  | -2.9676050000 | -1.9079230000 | -2.1287880000 |
| O  | 3.1896450000  | -1.5956160000 | -2.2173420000 |
| O  | -0.1278130000 | 3.4418890000  | -2.2348140000 |
| N  | -0.7765340000 | 3.4968690000  | -0.0744570000 |
| N  | -2.6543860000 | -2.4605040000 | 0.0345560000  |
| N  | 3.4651900000  | -1.0821550000 | -0.0393580000 |
| C  | -3.6523110000 | 2.5123680000  | 2.0613800000  |
| H  | -4.7341260000 | 2.5947590000  | 2.0579250000  |
| C  | -2.9195020000 | 3.0323640000  | 1.0027480000  |
| H  | -3.4172660000 | 3.5210250000  | 0.1721170000  |
| C  | -1.4877610000 | -1.9637060000 | 2.1248330000  |
| H  | -1.8885290000 | -0.9566490000 | 2.0909800000  |
| C  | -3.0016240000 | 1.8987910000  | 3.1267120000  |
| H  | -3.5741150000 | 1.5031740000  | 3.9592090000  |
| C  | 6.2832970000  | -1.8378020000 | -1.0994220000 |
| H  | 5.8519080000  | -1.5415340000 | -2.0590050000 |
| C  | 7.3822020000  | -2.8800930000 | -1.2969250000 |
| H  | 6.6885910000  | -0.9340220000 | -0.6313620000 |
| C  | 4.0372660000  | -4.1643700000 | -0.6237070000 |
| C  | 2.5915230000  | -4.4290960000 | -0.2165110000 |
| H  | 4.6960310000  | -4.9612950000 | -0.2560430000 |
| H  | 4.1274770000  | -4.1471910000 | -1.7127140000 |
| C  | 3.9589300000  | 1.0633550000  | 1.0209350000  |
| H  | 4.5783410000  | 1.3190930000  | 0.1679390000  |
| C  | -0.6836950000 | -2.3717050000 | 3.1822210000  |
| H  | -0.4751850000 | -1.6813790000 | 3.9934670000  |

|   |               |               |               |
|---|---------------|---------------|---------------|
| C | -0.6782250000 | 2.9027450000  | -1.2901280000 |
| C | 3.8270260000  | 1.9416430000  | 2.0887340000  |
| H | 4.3513760000  | 2.8913490000  | 2.0710250000  |
| C | -0.8789270000 | 2.3052390000  | 2.0565450000  |
| H | 0.2006550000  | 2.2027910000  | 2.0329890000  |
| C | -1.2313320000 | -4.1309640000 | 1.1055240000  |
| H | -1.4519630000 | -4.8088980000 | 0.2877230000  |
| C | 2.3708760000  | 0.3788390000  | 3.1936210000  |
| H | 1.7524150000  | 0.1054250000  | 4.0426160000  |
| C | -0.4218690000 | -4.5323200000 | 2.1596560000  |
| H | -0.0051410000 | -5.5338860000 | 2.1659640000  |
| C | -0.7403210000 | 6.3939050000  | -1.3121600000 |
| H | -0.3246350000 | 6.1061090000  | -2.2803290000 |
| H | -0.3941880000 | 7.4117640000  | -1.0948300000 |
| C | -2.2645010000 | 6.3444430000  | -1.3467480000 |
| C | -0.3732290000 | 5.8893180000  | 1.8443380000  |
| H | -1.3787430000 | 5.5378940000  | 2.0978950000  |
| H | -0.4474820000 | 6.9795740000  | 1.7554170000  |
| C | 0.6165680000  | 5.5191380000  | 2.9459260000  |
| C | -1.5278080000 | 2.9305760000  | 0.9929050000  |
| C | -5.3906260000 | -0.9267020000 | -0.2235510000 |
| H | -4.9176260000 | -0.1910670000 | 0.4357160000  |
| C | -6.9092250000 | -0.9121700000 | -0.0539740000 |
| H | -5.1048720000 | -0.6601620000 | -1.2432660000 |
| C | -2.2102840000 | -2.0918270000 | -1.1903920000 |
| C | 1.9897870000  | 4.9474050000  | -0.2041310000 |
| H | 2.3461130000  | 4.3404940000  | 0.6344510000  |
| C | 2.7795290000  | 6.2501110000  | -0.3145530000 |
| H | 2.1049850000  | 4.3394460000  | -1.1048010000 |
| C | 3.2915180000  | -0.1624070000 | 1.0314880000  |
| C | 3.0372260000  | 1.5993340000  | 3.1812080000  |
| H | 2.9455290000  | 2.2799840000  | 4.0213140000  |
| C | -1.7732630000 | -2.8450500000 | 1.0837330000  |
| C | -5.1096840000 | -4.1307630000 | -1.0369100000 |
| C | -5.6277150000 | -3.7194410000 | -2.4120990000 |
| H | -5.8642060000 | -4.7151970000 | -0.4968640000 |



|   |               |               |               |
|---|---------------|---------------|---------------|
| H | -4.2354730000 | -4.7831350000 | -1.1370860000 |
| C | 2.4909450000  | -0.4975560000 | 2.1221470000  |
| H | 1.9549760000  | -1.4404150000 | 2.1149630000  |
| C | 5.3787310000  | -2.5631450000 | 1.8956970000  |
| H | 5.3973400000  | -1.5414300000 | 2.2891690000  |
| H | 6.4247990000  | -2.8916200000 | 1.8627780000  |
| C | 4.5760950000  | -3.4810930000 | 2.8133240000  |
| C | 2.9207730000  | -0.8818210000 | -1.2656130000 |
| C | -0.1510640000 | -3.6556610000 | 3.2049970000  |
| H | 0.4715020000  | -3.9738870000 | 4.0348210000  |
| C | -4.8890400000 | -3.2133050000 | 2.0310340000  |
| H | -4.1118680000 | -3.9336100000 | 2.3075900000  |
| H | -5.8307030000 | -3.7749400000 | 2.0196740000  |
| C | -4.9656040000 | -2.0862540000 | 3.0574640000  |
| C | -1.6149670000 | 1.7980710000  | 3.1207730000  |
| H | -1.0998440000 | 1.3202920000  | 3.9481240000  |
| H | 3.5378480000  | -3.1518100000 | 2.9091780000  |
| H | 5.0034250000  | -3.5055610000 | 3.8211960000  |
| H | 4.5593810000  | -4.5100990000 | 2.4415170000  |
| H | 6.9996780000  | -3.7778280000 | -1.7920260000 |
| H | 7.8276330000  | -3.1936240000 | -0.3469080000 |
| H | 8.1934550000  | -2.4891560000 | -1.9190750000 |
| H | 1.9144600000  | -3.6733620000 | -0.6223860000 |
| H | 2.4632050000  | -4.4392040000 | 0.8696470000  |
| H | 2.2547740000  | -5.4008080000 | -0.5937550000 |
| H | -5.1768870000 | -2.4766070000 | 4.0584350000  |
| H | -5.7551790000 | -1.3698070000 | 2.8131790000  |
| H | -4.0277370000 | -1.5289060000 | 3.1181080000  |
| H | -4.8768030000 | -3.1451580000 | -2.9563220000 |
| H | -6.5270190000 | -3.1012830000 | -2.3354090000 |
| H | -5.8889910000 | -4.5987210000 | -3.0099010000 |
| H | -7.4015270000 | -1.6167720000 | -0.7309990000 |
| H | -7.3192440000 | 0.0793060000  | -0.2715230000 |
| H | -7.2164250000 | -1.1728300000 | 0.9639680000  |
| H | -2.6672180000 | 7.0418570000  | -2.0879810000 |
| H | -2.7073800000 | 6.6046450000  | -0.3796840000 |

|   |               |              |               |
|---|---------------|--------------|---------------|
| H | -2.6179220000 | 5.3455210000 | -1.6178930000 |
| H | 3.8493180000  | 6.0563970000 | -0.4427720000 |
| H | 2.6689950000  | 6.8777990000 | 0.5761970000  |
| H | 2.4555260000  | 6.8442670000 | -1.1743880000 |
| H | 0.6869240000  | 4.4361960000 | 3.0786130000  |
| H | 0.3160690000  | 5.9455050000 | 3.9085740000  |
| H | 1.6231800000  | 5.8876990000 | 2.7260660000  |

(Et<sub>3</sub>Ge-PhNCO)<sub>3</sub>P<sub>7</sub> – OOO

Charge = 0 Multiplicity = 1

|   |               |               |               |
|---|---------------|---------------|---------------|
| P | -1.1354820000 | 1.4779360000  | -0.3729970000 |
| P | -0.6661740000 | -1.7821500000 | -0.4288910000 |
| P | -0.6047770000 | -1.0863230000 | -2.5471570000 |
| P | -0.5964720000 | 1.1336250000  | -2.5097400000 |
| P | 0.0414950000  | -0.0352320000 | 0.7281370000  |
| P | 1.9261330000  | 0.2613660000  | -0.3939660000 |
| P | 1.3223630000  | 0.0162640000  | -2.5281930000 |
| O | -3.2278750000 | -1.3306660000 | -1.1298610000 |
| O | 2.8014210000  | -2.1760050000 | -1.1394760000 |
| O | 0.5128190000  | 3.4888380000  | -1.0609470000 |
| N | -0.0010230000 | 3.5436380000  | 1.1445700000  |
| N | -3.0365400000 | -1.8891090000 | 1.0578820000  |
| N | 3.1867100000  | -1.7753650000 | 1.0566310000  |
| C | -2.7902340000 | 2.8251260000  | 3.4723860000  |
| H | -3.8685970000 | 2.9412490000  | 3.5154500000  |
| C | -2.1053510000 | 3.2223260000  | 2.3313230000  |
| H | -2.6384060000 | 3.6543310000  | 1.4909440000  |
| C | -2.1263220000 | -1.4651040000 | 3.2608580000  |
| H | -2.5315110000 | -0.4598080000 | 3.2174950000  |
| C | -2.1020540000 | 2.2911790000  | 4.5560590000  |
| H | -2.6382640000 | 1.9892010000  | 5.4496010000  |
| C | 4.0408050000  | 0.1672130000  | 2.2531120000  |
| H | 4.6837030000  | 0.3954410000  | 1.4094200000  |
| C | -1.4369860000 | -1.9008780000 | 4.3832830000  |
| H | -1.3134720000 | -1.2254410000 | 5.2237110000  |
| C | -0.0920750000 | 2.9978070000  | -0.0000850000 |

|    |               |               |               |
|----|---------------|---------------|---------------|
| C  | 4.0760250000  | 0.9499260000  | 3.3996670000  |
| H  | 4.7481390000  | 1.8010800000  | 3.4446360000  |
| C  | -0.0260940000 | 2.5557600000  | 3.3525450000  |
| H  | 1.0515280000  | 2.4456960000  | 3.2963280000  |
| C  | -1.7592890000 | -3.6075660000 | 2.2183360000  |
| H  | -1.9024870000 | -4.2727790000 | 1.3733120000  |
| C  | 2.4151100000  | -0.4560790000 | 4.4145780000  |
| H  | 1.7748010000  | -0.7066920000 | 5.2541860000  |
| C  | -1.0746320000 | -4.0368140000 | 3.3478620000  |
| H  | -0.6734220000 | -5.0449380000 | 3.3780690000  |
| C  | -0.7153120000 | 3.0847500000  | 2.2580040000  |
| C  | -2.5101100000 | -1.6511240000 | -0.0743000000 |
| C  | 3.1838730000  | -0.9354960000 | 2.1773290000  |
| C  | 3.2645610000  | 0.6434510000  | 4.4863300000  |
| H  | 3.3000700000  | 1.2517150000  | 5.3840650000  |
| C  | -2.2860710000 | -2.3131400000 | 2.1617930000  |
| C  | 2.3767110000  | -1.2461470000 | 3.2747670000  |
| H  | 1.7094980000  | -2.0993280000 | 3.2155950000  |
| C  | 2.7235250000  | -1.4125210000 | -0.0703270000 |
| C  | -0.9092220000 | -3.1870480000 | 4.4359620000  |
| H  | -0.3802030000 | -3.5272630000 | 5.3200050000  |
| C  | -0.7188070000 | 2.1578100000  | 4.4867460000  |
| H  | -0.1685680000 | 1.7414150000  | 5.3244210000  |
| Ge | 1.4572300000  | 5.1086230000  | -0.9459420000 |
| Ge | -5.1047140000 | -1.2965080000 | -1.0355160000 |
| Ge | 3.6855590000  | -3.8321670000 | -1.0593290000 |
| C  | -5.6809920000 | -3.1188470000 | -0.6139800000 |
| C  | -5.4475460000 | -0.7435130000 | -2.8819260000 |
| C  | -5.6618280000 | 0.0543090000  | 0.2624350000  |
| H  | -5.1330580000 | -3.7944060000 | -1.2791810000 |
| C  | -7.1876780000 | -3.3316750000 | -0.7512460000 |
| H  | -5.3439130000 | -3.3315790000 | 0.4035050000  |
| C  | -6.8689580000 | -0.2470750000 | -3.1419180000 |
| H  | -5.2018860000 | -1.5848680000 | -3.5377390000 |
| H  | -4.7181220000 | 0.0414530000  | -3.1066790000 |
| H  | -5.3435310000 | -0.3018040000 | 1.2451600000  |

|   |               |               |               |
|---|---------------|---------------|---------------|
| H | -6.7591160000 | 0.0565520000  | 0.2606390000  |
| C | -5.1163560000 | 1.4513920000  | -0.0196950000 |
| C | 2.9754260000  | 4.8860790000  | 0.2642940000  |
| C | 0.1850760000  | 6.4899970000  | -0.3997860000 |
| C | 1.9883820000  | 5.2453480000  | -2.8222290000 |
| C | 3.9480660000  | 3.7832850000  | -0.1441200000 |
| H | 2.5602000000  | 4.6983730000  | 1.2574540000  |
| H | 3.4823290000  | 5.8581540000  | 0.3079720000  |
| H | -0.0019800000 | 6.3497120000  | 0.6676500000  |
| C | -1.1204090000 | 6.4781250000  | -1.1893970000 |
| H | 0.6961330000  | 7.4540290000  | -0.5118940000 |
| H | 2.5317450000  | 4.3295720000  | -3.0756160000 |
| C | 2.8340510000  | 6.4813800000  | -3.1214520000 |
| H | 1.0772860000  | 5.2379120000  | -3.4285680000 |
| C | 3.4791820000  | -4.3397130000 | -2.9361550000 |
| C | 2.7223700000  | -5.0123250000 | 0.1643610000  |
| C | 5.5425920000  | -3.4886850000 | -0.5516870000 |
| H | 3.3016720000  | -5.9424650000 | 0.2189240000  |
| C | 1.2773770000  | -5.2924720000 | -0.2380790000 |
| H | 2.7742340000  | -4.5473550000 | 1.1519380000  |
| H | 5.5475060000  | -3.2664580000 | 0.5182760000  |
| C | 6.2067000000  | -2.3679540000 | -1.3460240000 |
| H | 6.0860950000  | -4.4319380000 | -0.6861910000 |
| H | 3.9661030000  | -3.5720400000 | -3.5455950000 |
| H | 2.4117860000  | -4.2866770000 | -3.1726430000 |
| C | 4.0402170000  | -5.7244280000 | -3.2529090000 |
| H | 2.2954710000  | 7.4075210000  | -2.8958700000 |
| H | 3.1201440000  | 6.5241360000  | -4.1768110000 |
| H | 3.7589310000  | 6.4918080000  | -2.5356800000 |
| H | 4.7811140000  | 3.7133180000  | 0.5630890000  |
| H | 4.3777170000  | 3.9654330000  | -1.1344910000 |
| H | 3.4565170000  | 2.8066380000  | -0.1706680000 |
| H | -1.7947540000 | 7.2709570000  | -0.8509480000 |
| H | -1.6480780000 | 5.5272020000  | -1.0731990000 |
| H | -0.9513320000 | 6.6281070000  | -2.2601330000 |
| H | -7.7545250000 | -2.6639250000 | -0.0949210000 |

|   |               |               |               |
|---|---------------|---------------|---------------|
| H | -7.4666750000 | -4.3560660000 | -0.4856060000 |
| H | -7.5331660000 | -3.1583530000 | -1.7748270000 |
| H | -5.4660220000 | 2.1682330000  | 0.7305750000  |
| H | -5.4360200000 | 1.8233910000  | -0.9986260000 |
| H | -4.0229050000 | 1.4644720000  | -0.0053500000 |
| H | -6.9877350000 | 0.0899600000  | -4.1763380000 |
| H | -7.1282520000 | 0.5969660000  | -2.4951090000 |
| H | -7.6155510000 | -1.0282160000 | -2.9698160000 |
| H | 3.9017430000  | -5.9798790000 | -4.3079490000 |
| H | 3.5489760000  | -6.5060970000 | -2.6644490000 |
| H | 5.1133360000  | -5.7865430000 | -3.0450010000 |
| H | 1.2129660000  | -5.7587620000 | -1.2264930000 |
| H | 0.6866670000  | -4.3723840000 | -0.2655460000 |
| H | 0.7966010000  | -5.9716810000 | 0.4735980000  |
| H | 6.2192530000  | -2.5808500000 | -2.4193290000 |
| H | 7.2440570000  | -2.2199470000 | -1.0300970000 |
| H | 5.6832670000  | -1.4175130000 | -1.2089650000 |

(Me<sub>3</sub>Ge-TsNCO)<sub>3</sub>P<sub>7</sub> – NNN

Charge = 0 Multiplicity = 1

|   |               |               |               |
|---|---------------|---------------|---------------|
| S | -2.9800130000 | 4.3341160000  | 0.8247670000  |
| S | 4.0505680000  | 0.4648140000  | -1.3367610000 |
| P | -0.0140430000 | 0.0429270000  | -0.3689690000 |
| P | -1.3456130000 | -1.3549170000 | 0.7297630000  |
| P | -0.7391530000 | 1.9024110000  | 0.5769650000  |
| P | 1.7190830000  | -0.1973720000 | 1.0010840000  |
| S | -1.2511070000 | -3.7395450000 | -1.6400670000 |
| P | -1.0070310000 | -0.8321820000 | 2.8726810000  |
| P | -0.9964100000 | 1.3914890000  | 2.7435100000  |
| P | 0.8995320000  | 0.2720940000  | 3.0251800000  |
| O | 2.4089810000  | 2.3799630000  | 1.5054190000  |
| O | -2.8662020000 | 0.9713180000  | -0.8239200000 |
| O | 0.4520000000  | -3.1427950000 | 1.7036350000  |
| O | -1.3771850000 | -2.3091350000 | -1.8463230000 |
| O | 2.8669010000  | -0.3609530000 | -1.4911450000 |
| O | 4.5592360000  | 1.2443460000  | -2.4472860000 |

|   |               |               |               |
|---|---------------|---------------|---------------|
| O | -1.9865450000 | 4.3247830000  | 1.8814100000  |
| O | -0.5580060000 | -4.5752300000 | -2.5988510000 |
| O | -4.2453190000 | 5.0267570000  | 1.0025630000  |
| N | -0.4649210000 | -3.9559470000 | -0.1660010000 |
| N | 3.7357350000  | 1.5524950000  | -0.0930370000 |
| N | -3.4397560000 | 2.7618050000  | 0.4353590000  |
| C | -2.5239130000 | 1.8234860000  | -0.0374040000 |
| C | 2.6568270000  | 1.4439260000  | 0.7717840000  |
| C | -0.2950210000 | -2.9455420000 | 0.7649150000  |
| C | -2.9825110000 | 5.2318760000  | -1.7646730000 |
| H | -4.0533220000 | 5.0671000000  | -1.7390700000 |
| C | -2.2020680000 | 4.9513330000  | -0.6478580000 |
| C | -2.3731180000 | 5.7378620000  | -2.8998440000 |
| H | -2.9767120000 | 5.9594580000  | -3.7746030000 |
| C | 5.3682780000  | -0.5628850000 | -0.7348760000 |
| C | -2.8819640000 | -4.4044510000 | -1.4088000000 |
| C | -0.9956780000 | 5.9752230000  | -2.9355150000 |
| C | -0.2427460000 | 5.6998390000  | -1.7951670000 |
| H | 0.8263460000  | 5.8879730000  | -1.8004270000 |
| C | -3.8048210000 | -3.6850240000 | -0.6546840000 |
| H | -3.5170850000 | -2.7402250000 | -0.2035110000 |
| C | 5.1104100000  | -1.4585670000 | 0.2995310000  |
| C | -0.8340430000 | 5.1867690000  | -0.6483460000 |
| H | -0.2522580000 | 4.9686220000  | 0.2388690000  |
| C | -3.2287020000 | -5.5961290000 | -2.0277030000 |
| H | -2.5000900000 | -6.1177100000 | -2.6372120000 |
| C | -0.3439800000 | 6.4936790000  | -4.1827770000 |
| H | -0.1446590000 | 5.6730340000  | -4.8805170000 |
| H | 0.6093460000  | 6.9786250000  | -3.9631120000 |
| H | -0.9852980000 | 7.2127830000  | -4.6982420000 |
| C | -5.0833810000 | -4.1927670000 | -0.5030960000 |
| H | -5.8073880000 | -3.6369290000 | 0.0851620000  |
| C | 7.4033310000  | -2.2349640000 | 0.1581050000  |
| C | -5.4615020000 | -5.3981170000 | -1.1038650000 |
| C | -4.5196740000 | -6.0850190000 | -1.8678290000 |
| H | -4.8001540000 | -7.0149940000 | -2.3526330000 |

|    |               |               |               |
|----|---------------|---------------|---------------|
| C  | -6.8585450000 | -5.9201600000 | -0.9423620000 |
| H  | -7.1410660000 | -5.9696080000 | 0.1131690000  |
| H  | -6.9644430000 | -6.9188800000 | -1.3699310000 |
| H  | -7.5788270000 | -5.2632700000 | -1.4405890000 |
| C  | 8.4947010000  | -3.1391730000 | 0.6492660000  |
| H  | 8.7134170000  | -2.9509120000 | 1.7049050000  |
| H  | 9.4168090000  | -2.9975660000 | 0.0827490000  |
| H  | 8.2012410000  | -4.1896410000 | 0.5616340000  |
| H  | 4.1189730000  | -1.5083670000 | 0.7406100000  |
| C  | 6.6128010000  | -0.5023860000 | -1.3428540000 |
| H  | 6.7765290000  | 0.1833540000  | -2.1659220000 |
| C  | 7.6233720000  | -1.3415210000 | -0.8882860000 |
| H  | 8.5992660000  | -1.3030410000 | -1.3621770000 |
| C  | 6.1322010000  | -2.2801270000 | 0.7416050000  |
| H  | 5.9380250000  | -2.9788260000 | 1.5497860000  |
| Ge | -5.3335860000 | 2.2763070000  | 0.5241150000  |
| Ge | 0.5207470000  | -5.5939070000 | 0.3028980000  |
| Ge | 4.7483480000  | 3.2213570000  | 0.1517570000  |
| C  | -5.4076510000 | 0.3324850000  | 0.4425600000  |
| C  | -6.2229080000 | 3.1331010000  | -0.9769330000 |
| C  | -5.9682840000 | 2.8541470000  | 2.2686580000  |
| C  | -0.0309430000 | -7.0141360000 | -0.9093040000 |
| C  | -0.0435050000 | -6.0776510000 | 2.1009230000  |
| C  | 2.3968880000  | -5.1462400000 | 0.0845950000  |
| C  | 6.3980370000  | 3.0919080000  | -0.8738660000 |
| C  | 5.1995030000  | 3.3250030000  | 2.0405650000  |
| C  | 3.5873170000  | 4.6237470000  | -0.5233690000 |
| H  | -1.1042770000 | -7.1997570000 | -0.8358300000 |
| H  | 0.4914990000  | -7.9226250000 | -0.5930730000 |
| H  | 0.2280020000  | -6.7862790000 | -1.9418470000 |
| H  | 3.0087440000  | -6.0383090000 | 0.2439730000  |
| H  | 2.6817130000  | -4.3763770000 | 0.8016320000  |
| H  | 2.5697180000  | -4.7775280000 | -0.9284640000 |
| H  | 0.3904380000  | -5.4103010000 | 2.8431550000  |
| H  | 0.2652000000  | -7.1075600000 | 2.3021350000  |
| H  | -1.1327290000 | -6.0280540000 | 2.1715620000  |

|   |               |               |               |
|---|---------------|---------------|---------------|
| H | -5.1797060000 | -0.0346360000 | -0.5567460000 |
| H | -6.4186770000 | 0.0292740000  | 0.7327200000  |
| H | -4.6977130000 | -0.1089120000 | 1.1454190000  |
| H | -5.2844070000 | 2.5055690000  | 3.0461000000  |
| H | -6.9506480000 | 2.4076610000  | 2.4488270000  |
| H | -6.0399600000 | 3.9390630000  | 2.3210060000  |
| H | -7.2633090000 | 2.8000000000  | -1.0231720000 |
| H | -5.7302780000 | 2.8615280000  | -1.9127770000 |
| H | -6.2078530000 | 4.2167320000  | -0.8494490000 |
| H | 3.3453610000  | 4.4226980000  | -1.5691460000 |
| H | 4.0957950000  | 5.5892840000  | -0.4564530000 |
| H | 2.6709530000  | 4.6550570000  | 0.0663760000  |
| H | 6.9549480000  | 4.0177180000  | -0.6980250000 |
| H | 6.2024980000  | 2.9841440000  | -1.9394160000 |
| H | 7.0130930000  | 2.2579160000  | -0.5302120000 |
| H | 5.9827370000  | 4.0766650000  | 2.1745790000  |
| H | 5.5880050000  | 2.3626910000  | 2.3823380000  |
| H | 4.3286940000  | 3.5881680000  | 2.6381310000  |

(Me<sub>3</sub>Ge-TsNCO)<sub>3</sub>P<sub>7</sub> – OOO

Charge = 0 Multiplicity = 1

|    |               |               |               |
|----|---------------|---------------|---------------|
| Ge | -2.7645200000 | -3.1275280000 | -2.0302290000 |
| Ge | -1.7819170000 | 4.4749840000  | 1.3193370000  |
| Ge | 5.2284860000  | -0.5124440000 | 0.9672990000  |
| S  | -4.5705010000 | -0.6982830000 | 1.4677200000  |
| S  | 1.3544990000  | 3.4694580000  | -1.9335440000 |
| P  | 0.3964660000  | -0.0607940000 | -0.4794330000 |
| P  | 0.9342800000  | -1.8756750000 | 0.6690580000  |
| P  | -1.5139130000 | 0.3368090000  | 0.5513470000  |
| P  | 1.5115820000  | 1.4411240000  | 0.7518820000  |
| S  | 2.8496600000  | -3.5097470000 | -1.5378350000 |
| P  | 0.8269870000  | -1.2058160000 | 2.7901120000  |
| P  | -1.0985760000 | -0.0918330000 | 2.7190690000  |
| P  | 0.8343510000  | 0.9999880000  | 2.8441940000  |
| O  | -0.3715580000 | 3.2153640000  | 1.4349230000  |
| O  | -1.9356150000 | -1.7274850000 | -1.0527880000 |



|   |               |               |               |
|---|---------------|---------------|---------------|
| O | 3.4123350000  | -0.9962200000 | 1.2500560000  |
| O | 1.4551310000  | -3.1530550000 | -1.7893550000 |
| O | 2.2284060000  | 2.3130950000  | -1.7387250000 |
| O | 0.5165720000  | 3.5584150000  | -3.1116600000 |
| O | -3.9802050000 | 0.6139350000  | 1.7466830000  |
| O | 3.7948960000  | -3.5643630000 | -2.6327840000 |
| O | -4.8467720000 | -1.6117620000 | 2.5582630000  |
| N | 3.5165610000  | -2.4837220000 | -0.4119300000 |
| N | 0.3709710000  | 3.6950960000  | -0.6196450000 |
| N | -3.6870920000 | -1.5076440000 | 0.3291000000  |
| C | -2.5132630000 | -1.1265640000 | -0.0557280000 |
| C | 0.3997430000  | 2.9358270000  | 0.4238900000  |
| C | 2.8118430000  | -1.8096000000 | 0.4326600000  |
| C | -1.4614320000 | -3.3394930000 | -3.4425080000 |
| H | -1.4717820000 | -2.4669960000 | -4.0990270000 |
| H | -1.7013020000 | -4.2258760000 | -4.0365780000 |
| H | -0.4609660000 | -3.4485140000 | -3.0192140000 |
| C | -0.9498870000 | 6.2268570000  | 1.2267180000  |
| H | -0.2766240000 | 6.3688280000  | 2.0746440000  |
| H | -1.7207620000 | 7.0017590000  | 1.2622460000  |
| H | -0.3852260000 | 6.3221680000  | 0.2988580000  |
| C | -7.0812360000 | -1.3873230000 | 0.6328510000  |
| H | -6.9439490000 | -2.2668580000 | 1.2516000000  |
| C | -6.0779870000 | -0.4292990000 | 0.5688120000  |
| C | -4.4732530000 | -2.4545520000 | -2.6642060000 |
| H | -5.1884630000 | -2.3661640000 | -1.8468710000 |
| H | -4.8652990000 | -3.1378210000 | -3.4233690000 |
| H | -4.3367360000 | -1.4741560000 | -3.1262470000 |
| C | -2.8648650000 | -4.6169880000 | -0.7909570000 |
| H | -1.8600440000 | -4.8937080000 | -0.4656190000 |
| H | -3.3208270000 | -5.4789370000 | -1.2857190000 |
| H | -3.4657580000 | -4.3404280000 | 0.0761350000  |
| C | -8.2506420000 | -1.1843650000 | -0.0851250000 |
| H | -9.0406830000 | -1.9278600000 | -0.0386680000 |
| C | 2.3648390000  | 4.9279840000  | -1.8503320000 |
| C | 2.8649160000  | -5.0796210000 | -0.7055180000 |

|   |                |               |               |
|---|----------------|---------------|---------------|
| C | -8.4312760000  | -0.0385240000 | -0.8622520000 |
| C | -2.8665500000  | 3.9536840000  | -0.1996910000 |
| H | -2.3449800000  | 4.1411120000  | -1.1380660000 |
| H | -3.8063320000  | 4.5130570000  | -0.1792750000 |
| H | -3.0836900000  | 2.8868320000  | -0.1091490000 |
| C | -7.4058460000  | 0.9083680000  | -0.9024220000 |
| H | -7.5321950000  | 1.8067640000  | -1.4990020000 |
| C | 1.8032490000   | -5.4199310000 | 0.1254860000  |
| H | 0.9798340000   | -4.7257110000 | 0.2580650000  |
| C | 3.5079020000   | 4.9222190000  | -1.0590430000 |
| C | -6.2292350000  | 0.7222510000  | -0.1923400000 |
| H | -5.4391580000  | 1.4643590000  | -0.2130960000 |
| C | 6.3044710000   | -2.0729300000 | 1.3829510000  |
| H | 6.0312950000   | -2.4684250000 | 2.3634870000  |
| H | 7.3617480000   | -1.7938770000 | 1.4034860000  |
| H | 6.1476740000   | -2.8424920000 | 0.6272650000  |
| C | 5.3417830000   | 0.8763110000  | 2.3199520000  |
| H | 4.6232960000   | 1.6666560000  | 2.0933360000  |
| H | 6.3469470000   | 1.3058470000  | 2.3393300000  |
| H | 5.1166440000   | 0.4696080000  | 3.3079200000  |
| C | 3.9345410000   | -5.9425040000 | -0.8979230000 |
| H | 4.7391030000   | -5.6564180000 | -1.5658180000 |
| C | 5.3434900000   | 0.1620110000  | -0.8445720000 |
| H | 5.3160120000   | -0.6596130000 | -1.5603790000 |
| H | 6.2797590000   | 0.7155130000  | -0.9620850000 |
| H | 4.5091660000   | 0.8390210000  | -1.0456580000 |
| C | -9.7128110000  | 0.1872540000  | -1.6090330000 |
| H | -10.1654600000 | -0.7573540000 | -1.9191000000 |
| H | -9.5530660000  | 0.7999460000  | -2.4991150000 |
| H | -10.4406740000 | 0.7082490000  | -0.9772800000 |
| C | -2.6339690000  | 4.0903640000  | 3.0170930000  |
| H | -3.0572030000  | 3.0834010000  | 2.9966680000  |
| H | -3.4398860000  | 4.8051230000  | 3.2043710000  |
| H | -1.9109270000  | 4.1585430000  | 3.8323420000  |
| C | 1.8266090000   | -6.6429440000 | 0.7768320000  |
| H | 1.0026950000   | -6.9137640000 | 1.4302610000  |

|   |              |               |               |
|---|--------------|---------------|---------------|
| C | 3.9402060000 | 7.2161580000  | -1.7123760000 |
| C | 2.8891860000 | -7.5337920000 | 0.6035240000  |
| C | 3.9371770000 | -7.1652470000 | -0.2408170000 |
| H | 4.7688170000 | -7.8474370000 | -0.3886270000 |
| C | 2.8845020000 | -8.8689730000 | 1.2877650000  |
| H | 2.4431850000 | -8.8031550000 | 2.2852500000  |
| H | 3.8949690000 | -9.2714230000 | 1.3855710000  |
| H | 2.2941690000 | -9.5935760000 | 0.7162200000  |
| C | 4.7876330000 | 8.4511000000  | -1.6214090000 |
| H | 4.6821330000 | 8.9236500000  | -0.6391070000 |
| H | 4.5044540000 | 9.1864190000  | -2.3769280000 |
| H | 5.8467860000 | 8.2148760000  | -1.7559460000 |
| H | 3.7837130000 | 4.0241170000  | -0.5170470000 |
| C | 1.9988160000 | 6.0504220000  | -2.5778150000 |
| H | 1.1155370000 | 6.0164490000  | -3.2054730000 |
| C | 2.7925350000 | 7.1876620000  | -2.5038940000 |
| H | 2.5179900000 | 8.0672870000  | -3.0779820000 |
| C | 4.2857650000 | 6.0664290000  | -0.9957080000 |
| H | 5.1839830000 | 6.0676880000  | -0.3852690000 |

(Et<sub>3</sub>Ge-TsNCO)<sub>3</sub>P<sub>7</sub> – NNN

Charge = 0 Multiplicity = 1

|   |               |               |               |
|---|---------------|---------------|---------------|
| S | -4.4411900000 | -2.1593930000 | 0.8799000000  |
| S | -0.1695050000 | 3.8541930000  | -1.3821690000 |
| P | 0.3018890000  | -0.0001320000 | -0.3338880000 |
| P | 1.5461380000  | -1.5212090000 | 0.6930600000  |
| P | -1.6095980000 | -0.4144160000 | 0.6600030000  |
| P | 0.7604050000  | 1.6888600000  | 1.0544710000  |
| S | 3.8223170000  | -1.5439850000 | -1.7735450000 |
| P | 1.1049880000  | -1.1780690000 | 2.8548930000  |
| P | -1.0951420000 | -0.8178480000 | 2.8018820000  |
| P | 0.3213660000  | 0.8683890000  | 3.0955230000  |
| O | -1.4925680000 | 2.8246290000  | 1.9764090000  |
| O | -1.1029270000 | -2.6525720000 | -0.7600910000 |
| O | 3.5203410000  | 0.0605760000  | 1.6655240000  |
| O | 2.3896300000  | -1.7337020000 | -1.9028020000 |

|   |               |               |               |
|---|---------------|---------------|---------------|
| O | 0.9163860000  | 2.8901740000  | -1.4058590000 |
| O | -0.9537390000 | 4.1224820000  | -2.5687260000 |
| O | -4.1399250000 | -0.9611460000 | 1.6426070000  |
| O | 4.5917630000  | -0.9122560000 | -2.8236720000 |
| O | -5.2747190000 | -3.2088480000 | 1.4373770000  |
| N | 4.0889930000  | -0.6390090000 | -0.3776340000 |
| N | -1.2397640000 | 3.3921970000  | -0.1758340000 |
| N | -2.9985680000 | -2.9102130000 | 0.4555130000  |
| C | -1.8955590000 | -2.1753620000 | 0.0180230000  |
| C | -0.8229040000 | 2.7209770000  | 0.9653630000  |
| C | 3.2051840000  | -0.5848250000 | 0.6821280000  |
| C | -6.3138650000 | -2.3164700000 | -1.1086610000 |
| H | -6.7396660000 | -3.1160940000 | -0.5143250000 |
| C | -5.1751520000 | -1.6610120000 | -0.6637040000 |
| C | -6.8923430000 | -1.9225040000 | -2.3087760000 |
| H | -7.7853190000 | -2.4304050000 | -2.6597110000 |
| C | 0.4929120000  | 5.3971870000  | -0.7993770000 |
| C | 4.5541370000  | -3.1266400000 | -1.4345950000 |
| C | -6.3466950000 | -0.8895030000 | -3.0687130000 |
| C | -5.2035700000 | -0.2418200000 | -2.5894210000 |
| H | -4.7652120000 | 0.5687090000  | -3.1635020000 |
| C | 3.8553780000  | -4.0486070000 | -0.6611710000 |
| H | 2.8710590000  | -3.7995760000 | -0.2769210000 |
| C | 1.4384650000  | 5.3844000000  | 0.2225840000  |
| C | -4.6207840000 | -0.6108040000 | -1.3893050000 |
| H | -3.7447210000 | -0.0896440000 | -1.0172000000 |
| C | 5.7953930000  | -3.4318780000 | -1.9732060000 |
| H | 6.2976530000  | -2.7108400000 | -2.6077640000 |
| C | -6.9744350000 | -0.4617400000 | -4.3620440000 |
| H | -7.7564690000 | -1.1555770000 | -4.6759920000 |
| H | -6.2295530000 | -0.4021770000 | -5.1604070000 |
| H | -7.4256640000 | 0.5311150000  | -4.2648520000 |
| C | 4.4336300000  | -5.2810890000 | -0.4070780000 |
| H | 3.8938160000  | -6.0059000000 | 0.1950760000  |
| C | 1.5177860000  | 7.8069450000  | 0.1408600000  |
| C | 5.6902900000  | -5.6136920000 | -0.9224360000 |

|    |               |               |               |
|----|---------------|---------------|---------------|
| C  | 6.3544640000  | -4.6762730000 | -1.7122800000 |
| H  | 7.3212810000  | -4.9256530000 | -2.1385060000 |
| C  | 6.3035710000  | -6.9503760000 | -0.6266330000 |
| H  | 6.6228560000  | -7.0073960000 | 0.4192910000  |
| H  | 7.1778480000  | -7.1363220000 | -1.2532620000 |
| H  | 5.5868550000  | -7.7594680000 | -0.7918190000 |
| C  | 2.0790890000  | 9.1002470000  | 0.6531140000  |
| H  | 1.9339890000  | 9.1904350000  | 1.7336700000  |
| H  | 1.6055080000  | 9.9592570000  | 0.1744190000  |
| H  | 3.1555670000  | 9.1600910000  | 0.4643260000  |
| H  | 1.7780850000  | 4.4415620000  | 0.6408890000  |
| C  | 0.0649000000  | 6.5867500000  | -1.3687250000 |
| H  | -0.6497260000 | 6.5665710000  | -2.1836340000 |
| C  | 0.5826590000  | 7.7853160000  | -0.8923160000 |
| H  | 0.2556450000  | 8.7201360000  | -1.3368380000 |
| C  | 1.9374690000  | 6.5890230000  | 0.6869980000  |
| H  | 2.6722010000  | 6.5861410000  | 1.4866450000  |
| Ge | -2.9740510000 | -4.8853870000 | 0.3577620000  |
| Ge | 5.6503580000  | 0.5404210000  | -0.0649970000 |
| Ge | -3.0461090000 | 4.1768670000  | 0.0931680000  |
| C  | -1.2088030000 | -5.5322480000 | -0.1901120000 |
| C  | -4.3443050000 | -5.3617050000 | -0.9633730000 |
| C  | -3.3349200000 | -5.4759400000 | 2.1909960000  |
| C  | 6.8828770000  | 0.4119340000  | -1.5870520000 |
| C  | 6.5405430000  | -0.1413170000 | 1.5424940000  |
| C  | 4.8921370000  | 2.3467740000  | 0.0441520000  |
| C  | -3.7167220000 | 4.8290210000  | -1.6322820000 |
| C  | -2.7628660000 | 5.6754100000  | 1.3274500000  |
| C  | -4.1672160000 | 2.7034990000  | 0.7407990000  |
| H  | 7.1786300000  | -0.6294220000 | -1.7390810000 |
| C  | 8.1135290000  | 1.2857550000  | -1.3428050000 |
| H  | 6.3516240000  | 0.7177930000  | -2.4894250000 |
| H  | 5.4072460000  | 2.9455180000  | -0.7153730000 |
| C  | 4.9863700000  | 3.0086700000  | 1.4148250000  |
| H  | 3.8483830000  | 2.2742690000  | -0.2768430000 |
| H  | 5.9629700000  | 0.1792620000  | 2.4107240000  |

|   |               |               |               |
|---|---------------|---------------|---------------|
| H | 7.5123170000  | 0.3645900000  | 1.5926090000  |
| C | 6.7296990000  | -1.6551770000 | 1.5436510000  |
| H | -0.9671540000 | -5.1171850000 | -1.1695720000 |
| H | -1.3671130000 | -6.6107940000 | -0.3234990000 |
| C | -0.0755510000 | -5.2884270000 | 0.7997880000  |
| H | -2.6337750000 | -4.9475750000 | 2.8458460000  |
| C | -3.1981370000 | -6.9879040000 | 2.3637670000  |
| H | -4.3344550000 | -5.1335270000 | 2.4612390000  |
| C | -4.1671760000 | -6.7564930000 | -1.5619520000 |
| H | -4.3118360000 | -4.6030910000 | -1.7517080000 |
| H | -5.3177360000 | -5.2691660000 | -0.4737830000 |
| H | -3.5819300000 | 1.7824510000  | 0.6671640000  |
| H | -5.0012680000 | 2.6055130000  | 0.0373100000  |
| C | -4.6838010000 | 2.8704980000  | 2.1663520000  |
| H | -4.6098760000 | 5.4052040000  | -1.3546510000 |
| C | -4.0796380000 | 3.7566710000  | -2.6539840000 |
| H | -3.0069990000 | 5.5407880000  | -2.0591380000 |
| C | -3.9203180000 | 6.6709640000  | 1.3661200000  |
| H | -1.8372510000 | 6.1756090000  | 1.0234640000  |
| H | -2.5779670000 | 5.2457670000  | 2.3147360000  |
| H | 4.5687870000  | 4.0210170000  | 1.3866570000  |
| H | 6.0218900000  | 3.0960600000  | 1.7590800000  |
| H | 4.4308450000  | 2.4381880000  | 2.1619830000  |
| H | 7.8447020000  | 2.3327250000  | -1.1666730000 |
| H | 8.7820980000  | 1.2701410000  | -2.2091740000 |
| H | 8.6960100000  | 0.9481720000  | -0.4799030000 |
| H | 7.2665370000  | -1.9847090000 | 2.4388590000  |
| H | 7.3005460000  | -1.9996650000 | 0.6754380000  |
| H | 5.7690430000  | -2.1777490000 | 1.5295160000  |
| H | -5.2634090000 | 1.9917360000  | 2.4635430000  |
| H | -5.3321310000 | 3.7464600000  | 2.2710250000  |
| H | -3.8567080000 | 2.9723410000  | 2.8715350000  |
| H | -4.8597570000 | 6.1957480000  | 1.6655260000  |
| H | -4.0867180000 | 7.1423040000  | 0.3928280000  |
| H | -3.7243860000 | 7.4728880000  | 2.0850990000  |
| H | -4.5407280000 | 4.2022200000  | -3.5415700000 |

|   |               |               |               |
|---|---------------|---------------|---------------|
| H | -4.7934640000 | 3.0347900000  | -2.2448890000 |
| H | -3.1893830000 | 3.2166830000  | -2.9818790000 |
| H | -3.2155420000 | -6.8514450000 | -2.0923950000 |
| H | -4.9625230000 | -6.9775270000 | -2.2806900000 |
| H | -4.1968100000 | -7.5395820000 | -0.7980540000 |
| H | -2.1983390000 | -7.3479730000 | 2.1009280000  |
| H | -3.9170270000 | -7.5344910000 | 1.7452530000  |
| H | -3.3834100000 | -7.2800250000 | 3.4021600000  |
| H | 0.8307580000  | -5.8180880000 | 0.4866280000  |
| H | -0.3237000000 | -5.6360110000 | 1.8073790000  |
| H | 0.1770720000  | -4.2276070000 | 0.8589590000  |

(Et<sub>3</sub>Ge-TsNCO)<sub>3</sub>P<sub>7</sub> – OOO

Charge = 0 Multiplicity = 1

|    |               |               |               |
|----|---------------|---------------|---------------|
| Ge | 0.5983640000  | 4.6091210000  | -1.2665360000 |
| Ge | 4.0079010000  | -2.9360600000 | 0.9291770000  |
| Ge | -4.8700310000 | -2.2012040000 | 0.7810890000  |
| S  | 3.6852450000  | 2.9693140000  | 1.7284810000  |
| S  | 0.7979460000  | -3.4620760000 | -2.3262160000 |
| P  | -0.2330150000 | 0.0497010000  | -0.5355280000 |
| P  | -1.7334760000 | 1.0711520000  | 0.7384030000  |
| P  | 1.5553580000  | 0.6224750000  | 0.6316680000  |
| P  | -0.3809650000 | -1.9588310000 | 0.4297030000  |
| S  | -4.1195500000 | 1.5815180000  | -1.5558230000 |
| P  | -1.3047970000 | 0.3046460000  | 2.7840910000  |
| P  | 0.9187520000  | 0.4456360000  | 2.7829270000  |
| P  | -0.0907310000 | -1.5279260000 | 2.6090920000  |
| O  | 2.1618010000  | -2.5000490000 | 1.0755030000  |
| O  | 0.7339950000  | 2.8137870000  | -0.6301460000 |
| O  | -3.4063710000 | -1.0201260000 | 1.1095580000  |
| O  | -2.7473100000 | 2.0666940000  | -1.6835400000 |
| O  | -0.4383690000 | -2.6917600000 | -2.2171340000 |
| O  | 1.6393370000  | -3.3339740000 | -3.4985390000 |
| O  | 3.6126020000  | 1.5673170000  | 2.1470530000  |
| O  | -4.8681570000 | 1.1921950000  | -2.7320330000 |
| O  | 3.8049590000  | 4.0172850000  | 2.7205570000  |

|   |               |               |               |
|---|---------------|---------------|---------------|
| N | -4.1806090000 | 0.2856990000  | -0.5211110000 |
| N | 1.7758950000  | -3.1913940000 | -1.0133020000 |
| N | 2.4103580000  | 3.3533210000  | 0.7501770000  |
| C | 1.5927320000  | 2.4676840000  | 0.2774630000  |
| C | 1.3557530000  | -2.6128660000 | 0.0628000000  |
| C | -3.2644660000 | 0.0270640000  | 0.3519060000  |
| C | -0.5233760000 | 4.2608810000  | -2.8216120000 |
| H | -0.0020030000 | 3.4890780000  | -3.3984930000 |
| C | -0.7870300000 | 5.4887410000  | -3.6918820000 |
| H | -1.4538120000 | 3.8010120000  | -2.4800400000 |
| C | 4.0995790000  | -4.8835780000 | 0.7995300000  |
| C | 3.3698940000  | -5.6082650000 | 1.9270030000  |
| H | 5.1634670000  | -5.1502560000 | 0.7917340000  |
| H | 3.6955320000  | -5.1632290000 | -0.1767790000 |
| C | 5.8704720000  | 4.2209880000  | 0.6438060000  |
| H | 5.6797860000  | 4.9941210000  | 1.3794850000  |
| C | 5.0468640000  | 3.1073470000  | 0.5946410000  |
| C | 2.3804560000  | 5.2590040000  | -1.7701030000 |
| C | 2.9711580000  | 6.3065200000  | -0.8329150000 |
| H | 2.2941250000  | 5.6505450000  | -2.7901140000 |
| H | 3.0331220000  | 4.3825140000  | -1.8269920000 |
| C | -0.2355600000 | 5.5201410000  | 0.2505580000  |
| H | -0.9441180000 | 4.8051210000  | 0.6813830000  |
| C | -0.9372350000 | 6.8322010000  | -0.0948570000 |
| H | 0.5468520000  | 5.6760850000  | 0.9984970000  |
| C | 6.9310930000  | 4.3114630000  | -0.2492270000 |
| H | 7.5827580000  | 5.1792690000  | -0.2152500000 |
| C | 0.3886860000  | -5.1783530000 | -2.1136710000 |
| C | -5.0524730000 | 2.8188410000  | -0.6850830000 |
| C | 7.1731440000  | 3.3084310000  | -1.1871020000 |
| C | 4.7353770000  | -1.9348860000 | -0.5864670000 |
| C | 5.0777000000  | -2.7559270000 | -1.8250770000 |
| H | 5.6168830000  | -1.4068230000 | -0.2035390000 |
| H | 3.9903730000  | -1.1674130000 | -0.8204620000 |
| C | 6.3243910000  | 2.1969530000  | -1.2105830000 |
| H | 6.4982210000  | 1.4052850000  | -1.9333970000 |



|   |               |               |               |
|---|---------------|---------------|---------------|
| C | -4.4125690000 | 3.6171570000  | 0.2567760000  |
| H | -3.3534930000 | 3.4793420000  | 0.4486750000  |
| C | -0.6333810000 | -5.5284540000 | -1.2383700000 |
| C | 5.2670420000  | 2.0860580000  | -0.3232380000 |
| H | 4.6170590000  | 1.2171590000  | -0.3335310000 |
| C | -6.5221340000 | -1.2108790000 | 1.1165050000  |
| C | -6.4703230000 | -0.2933850000 | 2.3347750000  |
| H | -7.3101500000 | -1.9646790000 | 1.2372300000  |
| H | -6.7503380000 | -0.6440910000 | 0.2110470000  |
| C | -4.5108740000 | -3.5084530000 | 2.1914930000  |
| C | -3.2671900000 | -4.3641400000 | 1.9731140000  |
| H | -5.4054320000 | -4.1379560000 | 2.2720340000  |
| H | -4.4398290000 | -2.9565920000 | 3.1345200000  |
| C | -6.4054630000 | 2.9679300000  | -0.9548370000 |
| H | -6.8724630000 | 2.3435400000  | -1.7081130000 |
| C | -4.6272510000 | -2.8962190000 | -1.0260130000 |
| H | -4.8755810000 | -2.0902100000 | -1.7200700000 |
| C | -5.4721500000 | -4.1402460000 | -1.2997060000 |
| H | -3.5612700000 | -3.1058730000 | -1.1613410000 |
| C | 8.3338580000  | 3.3992400000  | -2.1334770000 |
| H | 8.6977750000  | 4.4248230000  | -2.2222460000 |
| H | 8.0621380000  | 3.0444510000  | -3.1309110000 |
| H | 9.1674020000  | 2.7807670000  | -1.7832520000 |
| C | 4.5643230000  | -2.2285830000 | 2.6596410000  |
| H | 4.3769620000  | -1.1499330000 | 2.6473310000  |
| C | 6.0274590000  | -2.5236700000 | 2.9851780000  |
| H | 3.9025530000  | -2.6528860000 | 3.4212750000  |
| C | -5.1500710000 | 4.5709300000  | 0.9404750000  |
| H | -4.6574340000 | 5.1956240000  | 1.6796210000  |
| C | -0.2396080000 | -7.8642510000 | -1.7538550000 |
| C | -6.5141630000 | 4.7450310000  | 0.6913600000  |
| C | -7.1262970000 | 3.9320370000  | -0.2630710000 |
| H | -8.1845310000 | 4.0573870000  | -0.4712290000 |
| C | -7.2920640000 | 5.8052800000  | 1.4137110000  |
| H | -6.9667090000 | 5.8992340000  | 2.4526710000  |
| H | -8.3625140000 | 5.5894850000  | 1.4077630000  |

|   |               |               |               |
|---|---------------|---------------|---------------|
| H | -7.1488900000 | 6.7811760000  | 0.9369980000  |
| C | -0.6015520000 | -9.3099030000 | -1.5800340000 |
| H | -0.8894010000 | -9.5272280000 | -0.5484920000 |
| H | 0.2298050000  | -9.9649200000 | -1.8489440000 |
| H | -1.4508840000 | -9.5746980000 | -2.2193050000 |
| H | -1.1770090000 | -4.7550930000 | -0.7051230000 |
| C | 1.0990440000  | -6.1424120000 | -2.8133420000 |
| H | 1.8807850000  | -5.8372240000 | -3.4996980000 |
| C | 0.7769700000  | -7.4804840000 | -2.6284640000 |
| H | 1.3259500000  | -8.2409550000 | -3.1755070000 |
| C | -0.9358940000 | -6.8689580000 | -1.0620650000 |
| H | -1.7300770000 | -7.1505820000 | -0.3768460000 |
| H | 6.7054670000  | -2.0946960000 | 2.2401010000  |
| H | 6.2283270000  | -3.5991860000 | 3.0308050000  |
| H | 6.3082960000  | -2.0993480000 | 3.9534960000  |
| H | 3.4517780000  | -6.6939360000 | 1.8164460000  |
| H | 2.3050900000  | -5.3596960000 | 1.9384320000  |
| H | 3.7767330000  | -5.3474120000 | 2.9087690000  |
| H | 5.5103650000  | -2.1218560000 | -2.6055520000 |
| H | 4.1848840000  | -3.2248780000 | -2.2431660000 |
| H | 5.8075750000  | -3.5413660000 | -1.6045550000 |
| H | -1.3512580000 | 6.2585760000  | -3.1573370000 |
| H | -1.3717450000 | 5.2174550000  | -4.5758900000 |
| H | 0.1392600000  | 5.9512180000  | -4.0483110000 |
| H | 3.9738600000  | 6.6016630000  | -1.1578520000 |
| H | 3.0521150000  | 5.9199320000  | 0.1855400000  |
| H | 2.3596710000  | 7.2136620000  | -0.7998800000 |
| H | -1.7753430000 | 6.6757360000  | -0.7799100000 |
| H | -0.2589050000 | 7.5523700000  | -0.5628850000 |
| H | -1.3378680000 | 7.3088960000  | 0.8053630000  |
| H | -5.3052230000 | -4.5050060000 | -2.3174510000 |
| H | -6.5431890000 | -3.9351360000 | -1.2033980000 |
| H | -5.2330740000 | -4.9624010000 | -0.6172590000 |
| H | -6.2323690000 | -0.8413760000 | 3.2514290000  |
| H | -7.4321550000 | 0.2044390000  | 2.4914320000  |
| H | -5.7159600000 | 0.4882220000  | 2.2121630000  |

|   |               |               |              |
|---|---------------|---------------|--------------|
| H | -2.3659760000 | -3.7487770000 | 1.9137470000 |
| H | -3.3328160000 | -4.9367510000 | 1.0423550000 |
| H | -3.1263610000 | -5.0784420000 | 2.7903220000 |

(<sup>119</sup>Bu<sub>3</sub>Sn-TsNCO)<sub>3</sub>P<sub>7</sub> – NNN

Charge = 0 Multiplicity = 1

|   |               |               |               |
|---|---------------|---------------|---------------|
| S | 3.7915920000  | -2.7736010000 | -1.6565320000 |
| S | 0.8007350000  | 3.6762160000  | 1.7074070000  |
| P | -0.3742860000 | 0.1502310000  | 0.1781120000  |
| P | -1.8511450000 | -1.0399570000 | -0.9639940000 |
| P | 1.4221070000  | -0.4493910000 | -0.9488990000 |
| P | -0.5983900000 | 2.0532480000  | -0.9686290000 |
| S | -4.1484370000 | -1.2707780000 | 1.4711930000  |
| P | -1.4495550000 | -0.4835600000 | -3.0841280000 |
| P | 0.7774490000  | -0.4788310000 | -3.1027010000 |
| P | -0.3606220000 | 1.4324730000  | -3.1097550000 |
| O | 1.8244810000  | 2.8642120000  | -1.8411860000 |
| O | 0.5141550000  | -2.7037630000 | 0.2397900000  |
| O | -3.6477440000 | 0.9142900000  | -1.5909080000 |
| O | -2.7252940000 | -1.4345360000 | 1.7053130000  |
| O | -0.4074160000 | 2.8675210000  | 1.7004260000  |
| O | 1.7481360000  | 3.5919940000  | 2.8004360000  |
| O | 3.5796000000  | -1.4913580000 | -2.3114280000 |
| O | -5.0323230000 | -0.7820000000 | 2.5113410000  |
| O | 4.1627640000  | -3.9442730000 | -2.4243400000 |
| N | -4.3475480000 | -0.2105080000 | 0.1901060000  |
| N | 1.6451960000  | 3.3695510000  | 0.3048990000  |
| N | 2.4045110000  | -3.1572080000 | -0.8176370000 |
| C | 1.4100650000  | -2.2769410000 | -0.4783680000 |
| C | 1.1304180000  | 2.8022540000  | -0.8303650000 |
| C | -3.4063540000 | 0.0370670000  | -0.7732490000 |
| C | 6.0756380000  | -3.4237240000 | -0.2894500000 |
| H | 6.1656510000  | -4.2339810000 | -1.0040910000 |
| C | 5.0042140000  | -2.5490280000 | -0.3771630000 |
| C | 7.0180480000  | -3.2320780000 | 0.7147140000  |
| H | 7.8620100000  | -3.9108860000 | 0.7883580000  |

|   |               |               |               |
|---|---------------|---------------|---------------|
| C | 0.3203130000  | 5.3769460000  | 1.5232060000  |
| C | -4.7931860000 | -2.8250690000 | 0.8996510000  |
| C | 6.8992840000  | -2.1842020000 | 1.6253120000  |
| C | 5.8120210000  | -1.3111980000 | 1.5021670000  |
| H | 5.7071420000  | -0.4831390000 | 2.1966560000  |
| C | -3.9591230000 | -3.6986070000 | 0.2101790000  |
| H | -2.9281990000 | -3.4217620000 | 0.0178810000  |
| C | -0.6813770000 | 5.6979250000  | 0.6110450000  |
| C | 4.8679500000  | -1.4810330000 | 0.5051210000  |
| H | 4.0324120000  | -0.7949870000 | 0.4045140000  |
| C | -6.1166170000 | -3.1517980000 | 1.1664410000  |
| H | -6.7370860000 | -2.4672330000 | 1.7335780000  |
| C | 7.9104910000  | -1.9845510000 | 2.7151960000  |
| H | 8.7016260000  | -2.7349730000 | 2.6681200000  |
| H | 7.4397530000  | -2.0494180000 | 3.7010460000  |
| H | 8.3755200000  | -0.9967510000 | 2.6425590000  |
| C | -4.4750880000 | -4.9079580000 | -0.2296960000 |
| H | -3.8305190000 | -5.5918820000 | -0.7740660000 |
| C | -0.4352920000 | 8.0354920000  | 1.2068430000  |
| C | -5.8033510000 | -5.2627360000 | 0.0163810000  |
| C | -6.6116460000 | -4.3688300000 | 0.7202780000  |
| H | -7.6443490000 | -4.6319350000 | 0.9281930000  |
| C | -6.3368420000 | -6.5900710000 | -0.4358280000 |
| H | -5.8822510000 | -6.9006510000 | -1.3794790000 |
| H | -7.4202860000 | -6.5607280000 | -0.5700570000 |
| H | -6.1173740000 | -7.3666070000 | 0.3051890000  |
| C | -0.8508880000 | 9.4658200000  | 1.0285310000  |
| H | -0.7064300000 | 9.7897260000  | -0.0066570000 |
| H | -0.2768770000 | 10.1324250000 | 1.6746460000  |
| H | -1.9114390000 | 9.5969470000  | 1.2641730000  |
| H | -1.1708430000 | 4.9137300000  | 0.0413160000  |
| C | 0.9389840000  | 6.3544780000  | 2.2865560000  |
| H | 1.7000770000  | 6.0722820000  | 3.0051090000  |
| C | 0.5537230000  | 7.6800830000  | 2.1216830000  |
| H | 1.0295620000  | 8.4506150000  | 2.7203260000  |
| C | -1.0467480000 | 7.0238730000  | 0.4573170000  |

|    |               |               |               |
|----|---------------|---------------|---------------|
| H  | -1.8277230000 | 7.2811410000  | -0.2519560000 |
| Sn | 1.9020910000  | -5.0682060000 | 0.1546800000  |
| Sn | -6.0477090000 | 1.1261800000  | -0.1745590000 |
| Sn | 3.6384940000  | 4.1256350000  | -0.2608520000 |
| C  | 1.9505840000  | -4.5936930000 | 2.2702660000  |
| C  | 3.5783700000  | -6.3398310000 | -0.4093500000 |
| C  | 0.0303310000  | -5.6407200000 | -0.7925300000 |
| C  | -7.6117660000 | 0.5169760000  | 1.2104390000  |
| C  | -6.6654400000 | 0.6986930000  | -2.2099430000 |
| C  | -5.3049820000 | 3.0937060000  | 0.3330260000  |
| C  | 4.4200460000  | 4.9457260000  | 1.6021200000  |
| C  | 3.1583470000  | 5.7427810000  | -1.6323090000 |
| C  | 4.7393120000  | 2.3630830000  | -0.8738870000 |
| H  | -8.0464390000 | -0.4205220000 | 0.8448740000  |
| H  | -7.1418860000 | 0.3032060000  | 2.1731270000  |
| C  | -4.5096980000 | 3.1193470000  | 1.6375100000  |
| H  | -4.6937450000 | 3.4421370000  | -0.5042110000 |
| H  | -6.0649450000 | 1.3317330000  | -2.8685780000 |
| C  | -8.1579780000 | 0.8654640000  | -2.4807330000 |
| H  | 2.5064960000  | -3.6523870000 | 2.3319620000  |
| C  | 2.5743690000  | -5.6585440000 | 3.1690070000  |
| H  | 4.4768250000  | -5.8920420000 | 0.0299940000  |
| H  | 3.6946700000  | -6.2619450000 | -1.4938450000 |
| H  | 5.5687660000  | 2.2161280000  | -0.1728140000 |
| C  | 5.2416570000  | 2.3991080000  | -2.3147120000 |
| H  | 3.9973530000  | 5.9484580000  | 1.7323850000  |
| H  | 4.0326200000  | 4.3308780000  | 2.4191480000  |
| H  | 2.1814040000  | 6.1018420000  | -1.2888790000 |
| H  | 2.9958380000  | 5.3096190000  | -2.6215550000 |
| H  | 4.0433980000  | 1.5273670000  | -0.7440540000 |
| C  | 4.1637070000  | 6.8911730000  | -1.6602090000 |
| C  | 5.9462980000  | 5.0078770000  | 1.6398860000  |
| H  | -6.1763790000 | 3.7566440000  | 0.4002870000  |
| H  | -6.3543000000 | -0.3336150000 | -2.4090240000 |
| C  | -8.6966040000 | 1.5844490000  | 1.3529720000  |
| H  | 0.9246480000  | -4.3650010000 | 2.5738030000  |

|   |                |               |               |
|---|----------------|---------------|---------------|
| C | 3.4576020000   | -7.7997100000 | 0.0268180000  |
| H | -0.7445100000  | -5.0552220000 | -0.2895250000 |
| C | -0.2950190000  | -7.1301640000 | -0.7623550000 |
| H | 0.0914640000   | -5.2700590000 | -1.8207730000 |
| H | -8.4649930000  | 1.9043090000  | -2.2975120000 |
| H | -8.7434160000  | 0.2533200000  | -1.7813990000 |
| C | -8.5489600000  | 0.4885590000  | -3.9076810000 |
| H | -7.9668810000  | 1.0986720000  | -4.6092020000 |
| C | -10.0357550000 | 0.6595180000  | -4.1861320000 |
| H | -8.2528270000  | -0.5512590000 | -4.0941130000 |
| H | -10.3494250000 | 1.6976580000  | -4.0343220000 |
| H | -10.6382320000 | 0.0332170000  | -3.5198090000 |
| H | -10.2863670000 | 0.3852430000  | -5.2146430000 |
| H | -8.2528100000  | 2.5218000000  | 1.7145460000  |
| C | -9.8164290000  | 1.1767570000  | 2.3078870000  |
| H | -9.1408670000  | 1.8203680000  | 0.3759210000  |
| C | -10.8881330000 | 2.2466230000  | 2.4629070000  |
| H | -9.3800330000  | 0.9416480000  | 3.2863310000  |
| H | -10.2712710000 | 0.2458170000  | 1.9463000000  |
| H | -10.4633890000 | 3.1771150000  | 2.8534880000  |
| H | -11.6770600000 | 1.9289050000  | 3.1503430000  |
| H | -11.3588210000 | 2.4774670000  | 1.5015160000  |
| H | -5.0816770000  | 2.6504610000  | 2.4490160000  |
| C | -4.1171880000  | 4.5304330000  | 2.0651980000  |
| H | -3.5988550000  | 2.5185630000  | 1.5284690000  |
| H | -3.5567660000  | 5.0052450000  | 1.2502010000  |
| C | -3.2828620000  | 4.5507240000  | 3.3382270000  |
| H | -5.0259950000  | 5.1320350000  | 2.2005140000  |
| H | -3.8349060000  | 4.1152830000  | 4.1777040000  |
| H | -3.0020280000  | 5.5707880000  | 3.6169860000  |
| H | -2.3647260000  | 3.9712930000  | 3.2071940000  |
| C | 6.4890180000   | 5.5621530000  | 2.9549410000  |
| H | 6.3293850000   | 5.6261060000  | 0.8163960000  |
| H | 6.3688700000   | 4.0066510000  | 1.4804940000  |
| H | 6.0753850000   | 6.5656650000  | 3.1159480000  |
| C | 8.0096460000   | 5.6194340000  | 2.9986680000  |

|   |              |                |               |
|---|--------------|----------------|---------------|
| H | 6.1151010000 | 4.9450410000   | 3.7812100000  |
| H | 8.3702830000 | 6.0173820000   | 3.9513470000  |
| H | 8.4051180000 | 6.2577440000   | 2.2016740000  |
| H | 8.4464530000 | 4.6237040000   | 2.8688370000  |
| C | 5.9973020000 | 1.1332270000   | -2.7097830000 |
| H | 5.8969410000 | 3.2669370000   | -2.4706860000 |
| H | 4.3888060000 | 2.5313580000   | -2.9913040000 |
| C | 6.4898130000 | 1.1658270000   | -4.1499590000 |
| H | 5.3418600000 | 0.2680200000   | -2.5641220000 |
| H | 6.8491900000 | 0.9985590000   | -2.0300360000 |
| H | 7.0267190000 | 0.2492170000   | -4.4099020000 |
| H | 7.1672230000 | 2.0095190000   | -4.3226280000 |
| H | 5.6521030000 | 1.2652830000   | -4.8475010000 |
| H | 4.2880240000 | 7.2991990000   | -0.6494460000 |
| H | 3.7539070000 | 7.7136590000   | -2.2636580000 |
| C | 5.5370520000 | 6.5271370000   | -2.2211260000 |
| H | 6.2143590000 | 7.3768190000   | -2.0759790000 |
| C | 5.5222240000 | 6.1459950000   | -3.6956140000 |
| H | 5.9679860000 | 5.7019060000   | -1.6345630000 |
| H | 6.5307710000 | 5.9320700000   | -4.0601480000 |
| H | 5.1153830000 | 6.9616700000   | -4.3026360000 |
| H | 4.9128680000 | 5.2578810000   | -3.8824290000 |
| C | 2.6179960000 | -5.2696120000  | 4.6488780000  |
| H | 3.5968420000 | -5.8816250000  | 2.8352160000  |
| H | 2.0153730000 | -6.5984770000  | 3.0774500000  |
| H | 2.9542570000 | -6.1376420000  | 5.2288610000  |
| H | 1.5988240000 | -5.0493340000  | 4.9901050000  |
| C | 3.5248520000 | -4.0842410000  | 4.9526670000  |
| H | 3.5582900000 | -3.8788360000  | 6.0261970000  |
| H | 3.1810970000 | -3.1717560000  | 4.4577580000  |
| H | 4.5501990000 | -4.2787250000  | 4.6186940000  |
| H | 3.3348250000 | -7.8702790000  | 1.1158520000  |
| C | 4.6661800000 | -8.6395360000  | -0.3802260000 |
| H | 2.5566350000 | -8.2534470000  | -0.4060180000 |
| C | 4.5490770000 | -10.0982720000 | 0.0387720000  |
| H | 5.5701250000 | -8.1985800000  | 0.0588310000  |

|   |               |                |               |
|---|---------------|----------------|---------------|
| H | 4.7947010000  | -8.5737870000  | -1.4675980000 |
| H | 4.4503940000  | -10.1919160000 | 1.1253380000  |
| H | 5.4265750000  | -10.6758190000 | -0.2650810000 |
| H | 3.6700890000  | -10.5696250000 | -0.4132210000 |
| C | -0.3906120000 | -7.7058710000  | 0.6452460000  |
| H | 0.4513270000  | -7.6951600000  | -1.3351220000 |
| H | -1.2516710000 | -7.3025110000  | -1.2760440000 |
| H | 0.5717140000  | -7.5675180000  | 1.1608290000  |
| C | -0.7609670000 | -9.1813610000  | 0.6725800000  |
| H | -1.1230990000 | -7.1263690000  | 1.2211040000  |
| H | -0.8165790000 | -9.5630720000  | 1.6955850000  |
| H | -0.0239520000 | -9.7840180000  | 0.1318670000  |
| H | -1.7345420000 | -9.3515230000  | 0.2017060000  |

(<sup>119</sup>Bu<sub>3</sub>Sn-TsNCO)<sub>3</sub>P<sub>7</sub> – OOO

Charge = 0 Multiplicity = 1

|    |               |               |               |
|----|---------------|---------------|---------------|
| Sn | 2.7771000000  | -4.1175290000 | 0.7403470000  |
| Sn | 2.4227580000  | 4.3565920000  | -0.7511860000 |
| Sn | -5.3553200000 | -0.2315910000 | -0.2941120000 |
| S  | 4.5120650000  | -1.1533400000 | -2.1881360000 |
| S  | -0.8959380000 | 3.3463780000  | 2.1537800000  |
| P  | -0.1890350000 | -0.2307290000 | 0.2661090000  |
| P  | -1.0316930000 | -1.8173040000 | -1.0367840000 |
| P  | 1.6564370000  | 0.1222140000  | -0.9064720000 |
| P  | -1.2926300000 | 1.4915590000  | -0.6346090000 |
| S  | -2.9150770000 | -3.3790530000 | 1.2919610000  |
| P  | -1.0466620000 | -0.8822140000 | -3.0586720000 |
| P  | 0.9708860000  | 0.0659000000  | -3.0496450000 |
| P  | -0.8621820000 | 1.3027780000  | -2.8244190000 |
| O  | 0.7591480000  | 3.1206000000  | -1.2373630000 |
| O  | 1.8726830000  | -2.2467270000 | 0.2795920000  |
| O  | -3.4606410000 | -0.6292040000 | -1.2446670000 |
| O  | -1.4633810000 | -3.2590330000 | 1.3944060000  |
| O  | -1.5901320000 | 2.0612930000  | 2.0896250000  |
| O  | -0.0963390000 | 3.6836450000  | 3.3145120000  |
| O  | 3.9913660000  | 0.2066460000  | -2.3490060000 |



|   |               |               |               |
|---|---------------|---------------|---------------|
| O | -3.7339160000 | -3.3778490000 | 2.4871350000  |
| O | 4.7769370000  | -1.9692750000 | -3.3554270000 |
| N | -3.5255090000 | -2.1814970000 | 0.3209880000  |
| N | 0.0808160000  | 3.5472200000  | 0.8326170000  |
| N | 3.5518050000  | -2.0184710000 | -1.1598210000 |
| C | 2.4632600000  | -1.5468070000 | -0.6271390000 |
| C | -0.0348740000 | 2.8513070000  | -0.2579310000 |
| C | -2.8430580000 | -1.5462130000 | -0.5887010000 |
| C | 1.4335310000  | -4.6236180000 | 2.3551930000  |
| C | 1.3477340000  | -3.5269680000 | 3.4161630000  |
| H | 0.4450180000  | -4.7896600000 | 1.9177480000  |
| C | 1.6493290000  | 6.3778740000  | -0.6312330000 |
| C | 2.6531090000  | 7.3865810000  | -0.0735740000 |
| H | 0.7597250000  | 6.3271480000  | 0.0038910000  |
| C | 7.0569320000  | -1.9056020000 | -1.5183500000 |
| H | 6.9629570000  | -2.6100660000 | -2.3371730000 |
| C | 6.0072670000  | -1.0460250000 | -1.2344750000 |
| C | 4.7807380000  | -3.6780640000 | 1.4379450000  |
| C | 5.3377650000  | -4.7069190000 | 2.4195020000  |
| H | 4.7380320000  | -2.6871750000 | 1.9041230000  |
| C | 2.5179930000  | -5.2540820000 | -1.0850160000 |
| C | 8.2154190000  | -1.8278830000 | -0.7547480000 |
| H | 9.0451240000  | -2.4920290000 | -0.9768390000 |
| C | -2.1128260000 | 4.6224060000  | 1.9226900000  |
| C | -3.2706430000 | -4.8631960000 | 0.3792710000  |
| C | 8.3329570000  | -0.9083180000 | 0.2864900000  |
| C | 3.2859030000  | 3.5367750000  | 1.0558580000  |
| C | 4.7937390000  | 3.7397720000  | 1.1946930000  |
| H | 3.0403150000  | 2.4686550000  | 1.0346420000  |
| C | 7.2597840000  | -0.0481720000 | 0.5418080000  |
| H | 7.3378450000  | 0.6840000000  | 1.3401450000  |
| C | -2.3968880000 | -5.2746280000 | -0.6213890000 |
| H | -1.5079140000 | -4.6895910000 | -0.8341390000 |
| C | -3.1367720000 | 4.4176780000  | 1.0040120000  |
| C | 6.0992560000  | -0.1091300000 | -0.2110910000 |
| H | 5.2724940000  | 0.5667590000  | -0.0194600000 |

|   |               |               |               |
|---|---------------|---------------|---------------|
| C | -6.6480630000 | -1.9248570000 | -0.7021780000 |
| H | -6.7237750000 | -2.5010210000 | 0.2252510000  |
| H | -6.0953800000 | -2.5518600000 | -1.4107160000 |
| C | -5.8016940000 | 1.4525520000  | -1.6012920000 |
| C | -7.1040560000 | 2.1883900000  | -1.2900460000 |
| H | -5.8103470000 | 1.0757200000  | -2.6304040000 |
| C | -4.4157670000 | -5.5876950000 | 0.6769890000  |
| H | -5.0690610000 | -5.2512530000 | 1.4740070000  |
| C | -4.8563040000 | 0.3508890000  | 1.7275340000  |
| H | -5.0215310000 | -0.5233040000 | 2.3640350000  |
| H | -3.7749250000 | 0.5279870000  | 1.7168530000  |
| C | 9.5748120000  | -0.8427430000 | 1.1257960000  |
| H | 10.3888700000 | -1.4179430000 | 0.6805650000  |
| H | 9.3876900000  | -1.2475300000 | 2.1260880000  |
| H | 9.9146560000  | 0.1889110000  | 1.2513060000  |
| C | 3.5069990000  | 3.8994960000  | -2.5677200000 |
| H | 3.7896230000  | 2.8423950000  | -2.5135330000 |
| H | 2.7840410000  | 3.9854610000  | -3.3868920000 |
| C | -2.6877470000 | -6.4272050000 | -1.3342230000 |
| H | -2.0119470000 | -6.7513770000 | -2.1202230000 |
| C | -4.0277120000 | 6.6052040000  | 1.5486650000  |
| C | -3.8326740000 | -7.1793680000 | -1.0568110000 |
| C | -4.6872680000 | -6.7424700000 | -0.0443590000 |
| H | -5.5798330000 | -7.3164140000 | 0.1855710000  |
| C | -4.1162140000 | -8.4439610000 | -1.8127890000 |
| H | -3.8268710000 | -8.3535280000 | -2.8626300000 |
| H | -5.1755520000 | -8.7055400000 | -1.7702940000 |
| H | -3.5515500000 | -9.2818810000 | -1.3894050000 |
| C | -5.0787200000 | 7.6595520000  | 1.3615840000  |
| H | -5.3235150000 | 7.7931830000  | 0.3046290000  |
| H | -4.7545410000 | 8.6222260000  | 1.7618390000  |
| H | -6.0035550000 | 7.3797600000  | 1.8775470000  |
| H | -3.1804570000 | 3.4873820000  | 0.4459310000  |
| C | -2.0286610000 | 5.7948650000  | 2.6573360000  |
| H | -1.2242540000 | 5.9188950000  | 3.3736000000  |
| C | -2.9915210000 | 6.7783640000  | 2.4655000000  |

|   |               |               |               |
|---|---------------|---------------|---------------|
| H | -2.9359660000 | 7.6974810000  | 3.0408070000  |
| C | -4.0826580000 | 5.4124260000  | 0.8203560000  |
| H | -4.8828880000 | 5.2614550000  | 0.1014180000  |
| H | 1.8635610000  | -4.6377280000 | -1.7119320000 |
| C | 1.9286390000  | -6.6498860000 | -0.8977250000 |
| H | 3.4838060000  | -5.2919030000 | -1.5976560000 |
| H | 5.4213980000  | -3.5787230000 | 0.5575280000  |
| H | 1.7633980000  | -5.5718240000 | 2.7968100000  |
| C | -8.0258590000 | -1.5744040000 | -1.2556320000 |
| H | -4.9465530000 | 2.1347610000  | -1.5317850000 |
| C | -5.5729560000 | 1.5866720000  | 2.2645260000  |
| C | 4.7286610000  | 4.7754810000  | -2.8408910000 |
| H | 1.3186940000  | 6.6749110000  | -1.6321780000 |
| H | 2.7296500000  | 3.9678950000  | 1.8911560000  |
| C | 2.0825150000  | 8.7986240000  | 0.0294250000  |
| H | 3.5546730000  | 7.4168480000  | -0.7005890000 |
| H | 2.9899530000  | 7.0707520000  | 0.9228670000  |
| H | 1.1841730000  | 8.7722700000  | 0.6586320000  |
| H | 1.7475380000  | 9.1207360000  | -0.9644640000 |
| C | 3.0767970000  | 9.8058430000  | 0.5898890000  |
| H | 2.6412130000  | 10.8067840000 | 0.6545050000  |
| H | 3.9695480000  | 9.8733020000  | -0.0404730000 |
| H | 3.4039000000  | 9.5209830000  | 1.5951870000  |
| H | 5.3075330000  | 3.3364140000  | 0.3130770000  |
| C | 5.3847360000  | 3.0836250000  | 2.4452500000  |
| H | 5.0332700000  | 4.8119940000  | 1.2188250000  |
| H | 6.4773270000  | 3.1797620000  | 2.4070100000  |
| H | 5.1670970000  | 2.0076510000  | 2.4176780000  |
| C | 4.8751000000  | 3.6691610000  | 3.7554890000  |
| H | 5.0782720000  | 4.7442560000  | 3.8090090000  |
| H | 5.3617910000  | 3.1978000000  | 4.6138330000  |
| H | 3.7974810000  | 3.5274730000  | 3.8726460000  |
| C | 5.4445630000  | 4.4002620000  | -4.1358580000 |
| H | 5.4456240000  | 4.7009890000  | -2.0118740000 |
| H | 4.4381350000  | 5.8340520000  | -2.8916370000 |
| H | 4.7364050000  | 4.4820760000  | -4.9697180000 |

|   |              |              |              |
|---|--------------|--------------|--------------|
| H | 5.732200000  | 3.343325000  | -4.087105000 |
| C | 6.669415000  | 5.260393000  | -4.412914000 |
| H | 7.161286000  | 4.969193000  | -5.345120000 |
| H | 7.406352000  | 5.170370000  | -3.607857000 |
| H | 6.400660000  | 6.318827000  | -4.496522000 |
| C | 6.740961000  | -4.360677000 | 2.911915000  |
| H | 5.367736000  | -5.701772000 | 1.953615000  |
| H | 4.672978000  | -4.803401000 | 3.288256000  |
| C | 7.302598000  | -5.386953000 | 3.885913000  |
| H | 6.715142000  | -3.372018000 | 3.387272000  |
| H | 7.407284000  | -4.263016000 | 2.045762000  |
| H | 7.365764000  | -6.377712000 | 3.423972000  |
| H | 6.668421000  | -5.477577000 | 4.773722000  |
| H | 8.306740000  | -5.114699000 | 4.223014000  |
| H | 2.339173000  | -3.331027000 | 3.849357000  |
| C | 0.373416000  | -3.870165000 | 4.539033000  |
| H | 1.023271000  | -2.591522000 | 2.946377000  |
| H | 0.680728000  | -4.814226000 | 5.008399000  |
| H | -0.614318000 | -4.046029000 | 4.098770000  |
| C | 0.276871000  | -2.775828000 | 5.592668000  |
| H | 1.247512000  | -2.591229000 | 6.066090000  |
| H | -0.432456000 | -3.041275000 | 6.381637000  |
| H | -0.059769000 | -1.834236000 | 5.148168000  |
| C | 1.698068000  | -7.379246000 | -2.218654000 |
| H | 0.974841000  | -6.589858000 | -0.357249000 |
| H | 2.588670000  | -7.262512000 | -0.268619000 |
| C | 1.102075000  | -8.768401000 | -2.037698000 |
| H | 2.649189000  | -7.450413000 | -2.760539000 |
| H | 1.038785000  | -6.769973000 | -2.850073000 |
| H | 1.759846000  | -9.406010000 | -1.438042000 |
| H | 0.944917000  | -9.266668000 | -2.998493000 |
| H | 0.135869000  | -8.720673000 | -1.524031000 |
| C | -5.078045000 | 1.980514000  | 3.653950000  |
| H | -6.659129000 | 1.423969000  | 2.302620000  |
| H | -5.417318000 | 2.437034000  | 1.587987000  |
| H | -7.955842000 | 1.500216000  | -1.369157000 |

|   |                |               |               |
|---|----------------|---------------|---------------|
| C | -7.3572530000  | 3.3818560000  | -2.2081430000 |
| H | -7.1026340000  | 2.5403640000  | -0.2501860000 |
| H | -8.5808290000  | -0.9580570000 | -0.5354350000 |
| C | -8.8646390000  | -2.8047650000 | -1.5918700000 |
| H | -7.9225150000  | -0.9585340000 | -2.1588660000 |
| H | -5.2632040000  | 1.1507820000  | 4.3471890000  |
| C | -5.7287660000  | 3.2522220000  | 4.1795370000  |
| H | -3.9903380000  | 2.1065700000  | 3.6112760000  |
| H | -5.3653960000  | 3.5020900000  | 5.1802720000  |
| H | -6.8179910000  | 3.1493980000  | 4.2381920000  |
| H | -5.5084110000  | 4.1032790000  | 3.5261880000  |
| H | -8.3176960000  | -3.4198880000 | -2.3173120000 |
| C | -10.2405680000 | -2.4579140000 | -2.1431410000 |
| H | -8.9700450000  | -3.4210330000 | -0.6903600000 |
| H | -10.8185310000 | -1.8696800000 | -1.4228030000 |
| H | -10.8186660000 | -3.3564790000 | -2.3759330000 |
| H | -10.1610000000 | -1.8677510000 | -3.0619310000 |
| H | -7.3699990000  | 3.0357390000  | -3.2491340000 |
| H | -6.5098000000  | 4.0757090000  | -2.1335330000 |
| C | -8.6535070000  | 4.1147420000  | -1.8921120000 |
| H | -9.5178400000  | 3.4505620000  | -1.9944900000 |
| H | -8.8087930000  | 4.9650610000  | -2.5620130000 |
| H | -8.6527080000  | 4.4959110000  | -0.8654650000 |

(Me<sub>3</sub>Si-TsNCO)<sub>3</sub>As<sub>7</sub> – NNN

Charge = 0 Multiplicity = 1

|    |               |               |               |
|----|---------------|---------------|---------------|
| As | -0.4906000000 | 1.9300850000  | 0.8348110000  |
| As | -0.2121110000 | -0.0377300000 | -0.5961240000 |
| As | 1.8521380000  | -0.7315610000 | 0.4948210000  |
| As | -1.7755770000 | -1.4773310000 | 0.5941760000  |
| As | -0.0384380000 | 1.0574770000  | 3.0955070000  |
| As | -1.2183800000 | -1.0617840000 | 2.9533160000  |
| As | 1.2301550000  | -1.0219630000 | 2.8547410000  |
| S  | 4.2242040000  | -3.2582320000 | 0.6832050000  |
| S  | 0.8065300000  | 3.9576670000  | -1.7066350000 |
| S  | -4.2790260000 | -1.0684020000 | -1.7839440000 |

|   |               |               |               |
|---|---------------|---------------|---------------|
| O | 0.7053080000  | -3.0255650000 | -0.6981700000 |
| O | -3.4674970000 | 0.6150070000  | 1.5148400000  |
| O | 3.9034140000  | -2.2040380000 | 1.6308410000  |
| O | 4.6353100000  | -4.5644300000 | 1.1543340000  |
| O | -0.2402330000 | 2.9514890000  | -1.7237430000 |
| O | 2.1737530000  | 2.5409450000  | 1.5435670000  |
| O | -2.8747670000 | -1.3974930000 | -1.9493310000 |
| O | -4.9631550000 | -0.2486980000 | -2.7622270000 |
| O | 1.7281360000  | 4.0727100000  | -2.8177670000 |
| N | 2.8514230000  | -3.4861120000 | -0.2703570000 |
| N | 1.7220140000  | 3.6873890000  | -0.3164190000 |
| N | -4.4249890000 | -0.2838030000 | -0.2949770000 |
| C | 1.7383370000  | -2.6409380000 | -0.1939380000 |
| C | 5.4800460000  | -2.6496260000 | -0.4167500000 |
| C | 6.5935860000  | -3.4370500000 | -0.6688270000 |
| H | 6.6703880000  | -4.4177770000 | -0.2147000000 |
| C | -0.9026920000 | 5.6910770000  | -0.4424660000 |
| H | -1.1625740000 | 4.8533910000  | 0.1973380000  |
| C | 1.3647150000  | 2.7551050000  | 0.6652470000  |
| C | -6.5646050000 | -4.9964380000 | -1.4123380000 |
| C | 7.5940610000  | -2.9420900000 | -1.4962350000 |
| H | 8.4684130000  | -3.5535070000 | -1.6961690000 |
| C | -3.3630880000 | -0.1877710000 | 0.6123850000  |
| C | 7.4959910000  | -1.6753820000 | -2.0688260000 |
| C | -5.1859820000 | -2.5871190000 | -1.6102270000 |
| C | 5.3627060000  | -1.3721320000 | -0.9568140000 |
| H | 4.5040870000  | -0.7506560000 | -0.7219600000 |
| C | -1.2199720000 | 7.9978710000  | -1.1185350000 |
| C | -4.6863200000 | -3.5946690000 | -0.7903290000 |
| H | -3.7545210000 | -3.4530130000 | -0.2513870000 |
| C | 0.3537460000  | 6.5879930000  | -2.3075360000 |
| H | 1.0774740000  | 6.4369030000  | -3.0999440000 |
| C | -6.3454070000 | -2.7710190000 | -2.3487290000 |
| H | -6.6960050000 | -1.9809230000 | -3.0021550000 |
| C | 0.0441500000  | 5.5419370000  | -1.4519080000 |
| C | -7.0269030000 | -3.9773460000 | -2.2426750000 |

|    |               |               |               |
|----|---------------|---------------|---------------|
| H  | -7.9321890000 | -4.1285250000 | -2.8223030000 |
| C  | 6.3669010000  | -0.9002080000 | -1.7837130000 |
| H  | 6.2781650000  | 0.0947880000  | -2.2093270000 |
| C  | -5.3833260000 | -4.7861430000 | -0.6929190000 |
| H  | -4.9978300000 | -5.5755440000 | -0.0547720000 |
| C  | -0.2820820000 | 7.8112440000  | -2.1318090000 |
| H  | -0.0452720000 | 8.6334960000  | -2.7997310000 |
| C  | -1.5201730000 | 6.9185340000  | -0.2800140000 |
| H  | -2.2579230000 | 7.0412200000  | 0.5071760000  |
| C  | -1.9068990000 | 9.3176590000  | -0.9291250000 |
| H  | -1.5587820000 | 10.0571830000 | -1.6524220000 |
| H  | -1.7254550000 | 9.7133070000  | 0.0748060000  |
| H  | -2.9900430000 | 9.2140450000  | -1.0457860000 |
| C  | -7.3072330000 | -6.2936150000 | -1.2878620000 |
| H  | -7.7236520000 | -6.4083150000 | -0.2818470000 |
| H  | -6.6436480000 | -7.1452560000 | -1.4628300000 |
| H  | -8.1316500000 | -6.3529530000 | -2.0007870000 |
| C  | 8.5808400000  | -1.1378880000 | -2.9540240000 |
| H  | 9.0927070000  | -0.2975470000 | -2.4739980000 |
| H  | 8.1716570000  | -0.7708680000 | -3.8995510000 |
| H  | 9.3281010000  | -1.9008890000 | -3.1796450000 |
| Si | 3.3863440000  | 4.4512710000  | -0.0172600000 |
| Si | 2.5677840000  | -5.0003760000 | -1.3064740000 |
| Si | -5.8889020000 | 0.7596740000  | 0.1623640000  |
| C  | 3.6527750000  | 5.8262900000  | -1.2585290000 |
| C  | 4.6688660000  | 3.1199040000  | -0.2729740000 |
| C  | 3.3865030000  | 5.2340840000  | 1.6801760000  |
| H  | 2.9201270000  | 6.6307420000  | -1.1536000000 |
| H  | 3.6448070000  | 5.4750980000  | -2.2906740000 |
| H  | 4.6386640000  | 6.2553630000  | -1.0440630000 |
| H  | 5.6723460000  | 3.5390030000  | -0.1440450000 |
| H  | 4.5951250000  | 2.7262590000  | -1.2913040000 |
| H  | 4.5407740000  | 2.2993800000  | 0.4349770000  |
| H  | 2.4948540000  | 5.8548440000  | 1.8136840000  |
| H  | 4.2592700000  | 5.8898840000  | 1.7701920000  |
| H  | 3.4149940000  | 4.4935090000  | 2.4787010000  |

|   |               |               |               |
|---|---------------|---------------|---------------|
| C | 1.9624070000  | -4.4455760000 | -2.9850210000 |
| C | 1.3880170000  | -6.1128470000 | -0.3857890000 |
| C | 4.2054240000  | -5.8681720000 | -1.5601160000 |
| H | 1.2412980000  | -7.0437220000 | -0.9436380000 |
| H | 0.4178620000  | -5.6318080000 | -0.2506610000 |
| H | 1.7958140000  | -6.3687220000 | 0.5962960000  |
| H | 2.6195310000  | -3.6737040000 | -3.3975580000 |
| H | 0.9463520000  | -4.0531420000 | -2.9533550000 |
| H | 1.9910150000  | -5.3001770000 | -3.6699000000 |
| H | 4.9392510000  | -5.2346340000 | -2.0649330000 |
| H | 4.0105730000  | -6.7247030000 | -2.2160600000 |
| H | 4.6366510000  | -6.2372660000 | -0.6291420000 |
| C | -7.3253490000 | 0.3088780000  | -0.9484830000 |
| C | -5.4209930000 | 2.5475570000  | -0.0843430000 |
| C | -6.3881670000 | 0.3194060000  | 1.9099340000  |
| H | -7.1359750000 | 0.5368440000  | -1.9976100000 |
| H | -8.1829830000 | 0.9034740000  | -0.6126830000 |
| H | -7.6057510000 | -0.7438680000 | -0.8582360000 |
| H | -6.4702180000 | -0.7659710000 | 2.0246410000  |
| H | -7.3762320000 | 0.7459960000  | 2.1146510000  |
| H | -5.6817980000 | 0.6923600000  | 2.6508710000  |
| H | -6.2809840000 | 3.1916520000  | 0.1275830000  |
| H | -5.1158160000 | 2.7191710000  | -1.1205140000 |
| H | -4.5992570000 | 2.8329270000  | 0.5745150000  |

(Me<sub>3</sub>Si-TsNCO)<sub>3</sub>As<sub>7</sub> – OOO

Charge = 0 Multiplicity = 1

|    |               |               |               |
|----|---------------|---------------|---------------|
| As | 0.9175830000  | -1.9838040000 | 0.6658080000  |
| As | 0.2995540000  | -0.1008110000 | -0.7764740000 |
| As | -1.8921730000 | 0.1779580000  | 0.2574340000  |
| As | 1.4375680000  | 1.6447800000  | 0.4839430000  |
| As | 0.2011690000  | -1.2524430000 | 2.9085240000  |
| As | 1.0068700000  | 1.0384370000  | 2.8234750000  |
| As | -1.3970190000 | 0.5859830000  | 2.6421750000  |
| S  | -4.2824750000 | 2.5616280000  | 1.0001490000  |
| S  | 0.0780110000  | -3.8807360000 | -2.1032630000 |



|    |              |              |              |
|----|--------------|--------------|--------------|
| S  | 3.932140000  | 2.057602000  | -1.869783000 |
| Si | -1.507632000 | 3.679322000  | -2.535073000 |
| Si | 5.065987000  | -0.884473000 | 1.453358000  |
| Si | -3.035597000 | -4.075414000 | 1.298106000  |
| O  | -1.435165000 | 2.280127000  | -1.485964000 |
| O  | 3.590712000  | 0.046658000  | 1.332962000  |
| O  | -4.223991000 | 1.160032000  | 1.424721000  |
| O  | -4.194728000 | 3.617753000  | 1.987808000  |
| O  | 1.310774000  | -3.142004000 | -1.832326000 |
| O  | -1.526241000 | -3.200679000 | 1.270227000  |
| O  | 2.509839000  | 2.373121000  | -2.005423000 |
| O  | 4.649630000  | 1.454389000  | -2.971548000 |
| O  | -0.731381000 | -3.547449000 | -3.257230000 |
| N  | -3.147527000 | 2.867978000  | -0.168502000 |
| N  | -0.930081000 | -3.854534000 | -0.782094000 |
| N  | 4.193943000  | 1.079634000  | -0.550559000 |
| C  | -2.235185000 | 2.015807000  | -0.478868000 |
| C  | -5.774515000 | 2.780259000  | 0.065705000  |
| C  | -6.329256000 | 4.049612000  | -0.032368000 |
| H  | -5.863507000 | 4.881002000  | 0.484481000  |
| C  | 1.622690000  | -6.070353000 | -1.531539000 |
| H  | 2.269517000  | -5.372714000 | -1.011533000 |
| C  | -0.683748000 | -3.145578000 | 0.261643000  |
| C  | 6.114095000  | 5.856156000  | -0.613230000 |
| C  | -7.485315000 | 4.220426000  | -0.779192000 |
| H  | -7.926487000 | 5.209283000  | -0.859466000 |
| C  | 3.294282000  | 0.852873000  | 0.339358000  |
| C  | -8.093633000 | 3.142537000  | -1.425501000 |
| C  | 4.775958000  | 3.543582000  | -1.388221000 |
| C  | -6.357509000 | 1.687551000  | -0.562354000 |
| H  | -5.915195000 | 0.703631000  | -0.455519000 |
| C  | 1.099794000  | -8.316392000 | -2.278651000 |
| C  | 4.713725000  | -1.894925000 | 2.979599000  |
| H  | 4.504295000  | -1.253697000 | 3.840377000  |
| H  | 5.571644000  | -2.526935000 | 3.230419000  |
| H  | 3.848714000  | -2.546035000 | 2.825126000  |

|   |               |                |               |
|---|---------------|----------------|---------------|
| C | 4.0703580000  | 4.5602680000   | -0.7563050000 |
| H | 3.0046940000  | 4.4534950000   | -0.5858560000 |
| C | -0.3527940000 | -6.4688970000  | -2.8728150000 |
| H | -1.2242990000 | -6.0762020000  | -3.3841570000 |
| C | 6.1344960000  | 3.6644440000   | -1.6494560000 |
| H | 6.6540360000  | 2.8684810000   | -2.1708230000 |
| C | -1.0316760000 | 5.1618020000   | -1.5114310000 |
| H | -1.7474230000 | 5.3285220000   | -0.7030700000 |
| H | -0.9974930000 | 6.0599680000   | -2.1367310000 |
| H | -0.0393330000 | 5.0176530000   | -1.0743450000 |
| C | 0.4823910000  | -5.6067630000  | -2.1745350000 |
| C | 5.2348500000  | -1.9451950000  | -0.0669160000 |
| H | 4.3029790000  | -2.4817320000  | -0.2710340000 |
| H | 6.0271940000  | -2.6865720000  | 0.0827170000  |
| H | 5.4784380000  | -1.3450270000  | -0.9457440000 |
| C | 6.7927830000  | 4.8217560000   | -1.2597670000 |
| H | 7.8528900000  | 4.9276490000   | -1.4688130000 |
| C | -3.2215180000 | 3.8033900000   | -3.2630840000 |
| H | -3.5084050000 | 2.8647070000   | -3.7465940000 |
| H | -3.2361180000 | 4.5861580000   | -4.0293980000 |
| H | -3.9683810000 | 4.0435190000   | -2.5043280000 |
| C | -7.5137370000 | 1.8781560000   | -1.3037740000 |
| H | -7.9767830000 | 1.0285240000   | -1.7963370000 |
| C | 6.4920250000  | 0.2872610000   | 1.7194860000  |
| H | 6.6494480000  | 0.9155430000   | 0.8405830000  |
| H | 7.4105670000  | -0.2777170000  | 1.9106060000  |
| H | 6.3130240000  | 0.9351350000   | 2.5825250000  |
| C | 4.7458300000  | 5.7093380000   | -0.3744440000 |
| H | 4.1989710000  | 6.5116570000   | 0.1116020000  |
| C | -0.0371260000 | -7.8187060000  | -2.9182060000 |
| H | -0.6831680000 | -8.4990560000  | -3.4646960000 |
| C | 1.9216840000  | -7.4232150000  | -1.5882030000 |
| H | 2.8133770000  | -7.7932310000  | -1.0912230000 |
| C | 1.4523670000  | -9.7722240000  | -2.3628610000 |
| H | 0.5626510000  | -10.3914220000 | -2.4968690000 |
| H | 1.9730430000  | -10.1093330000 | -1.4635920000 |

|   |                |               |               |
|---|----------------|---------------|---------------|
| H | 2.1148840000   | -9.9591350000 | -3.2151560000 |
| C | 6.8388620000   | 7.0925070000  | -0.1692840000 |
| H | 7.1338530000   | 7.0096140000  | 0.8825700000  |
| H | 6.2074860000   | 7.9793820000  | -0.2619550000 |
| H | 7.7466150000   | 7.2552080000  | -0.7540990000 |
| C | -0.2419060000  | 3.2527090000  | -3.8244120000 |
| H | 0.7355190000   | 3.0567300000  | -3.3748940000 |
| H | -0.1352960000  | 4.0773390000  | -4.5371760000 |
| H | -0.5403400000  | 2.3625020000  | -4.3857240000 |
| C | -9.3621890000  | 3.3319410000  | -2.2036980000 |
| H | -10.2354690000 | 3.1824780000  | -1.5592060000 |
| H | -9.4361720000  | 2.6173480000  | -3.0266200000 |
| H | -9.4292210000  | 4.3403850000  | -2.6179690000 |
| C | -2.6710440000  | -5.9009550000 | 1.1829300000  |
| H | -2.2410190000  | -6.1548190000 | 0.2117590000  |
| H | -3.5940590000  | -6.4755790000 | 1.3145340000  |
| H | -1.9711280000  | -6.2125550000 | 1.9637900000  |
| C | -4.1222270000  | -3.4435160000 | -0.0754000000 |
| H | -4.2344720000  | -2.3577760000 | -0.0005740000 |
| H | -5.1177790000  | -3.8939650000 | -0.0006490000 |
| H | -3.7028160000  | -3.6808900000 | -1.0551700000 |
| C | -3.6852420000  | -3.5962650000 | 2.9763000000  |
| H | -2.9907530000  | -3.8886870000 | 3.7688930000  |
| H | -4.6459150000  | -4.0826600000 | 3.1732360000  |
| H | -3.8367530000  | -2.5148780000 | 3.0410190000  |

### 6.6. Optimised Structures at the PBE1PBE/6-311G(d,p) Level of Theory for clusters reactivity towards CO<sub>2</sub>

CO<sub>2</sub>

Charge = 0 Multiplicity = 1

|   |               |               |               |
|---|---------------|---------------|---------------|
| C | 0.0000000000  | -0.0001410000 | 0.0003820000  |
| O | 0.0010000000  | -0.9469220000 | -0.6716860000 |
| O | -0.0010000000 | 0.9470630000  | 0.6723040000  |

(Me<sub>3</sub>Si)<sub>3</sub>P<sub>7</sub>

Charge = 0 Multiplicity = 1

|    |               |               |               |
|----|---------------|---------------|---------------|
| P  | -0.4535530000 | 0.0161450000  | -0.3258980000 |
| P  | 0.5066060000  | 0.3221500000  | -2.2808610000 |
| P  | 0.6068580000  | -1.8230210000 | 0.2466790000  |
| P  | -2.3124390000 | -0.9154700000 | -1.0409460000 |
| P  | 0.2707350000  | -3.1458960000 | -1.4975790000 |
| P  | -1.5800740000 | -2.4092020000 | -2.5023900000 |
| P  | 0.4207010000  | -1.6964450000 | -3.1881760000 |
| Si | 2.7413590000  | 0.6384700000  | -1.8773270000 |
| Si | -0.6164230000 | -2.8083820000 | 1.9152900000  |
| Si | -3.3775980000 | 0.6341460000  | -2.3513500000 |
| C  | -3.3005660000 | 2.2589320000  | -1.4147490000 |
| C  | -5.1451690000 | 0.0057270000  | -2.4411110000 |
| C  | -2.6749460000 | 0.8236580000  | -4.0782560000 |
| C  | -1.0659620000 | -1.4365650000 | 3.1149270000  |
| C  | 0.5893950000  | -4.0121340000 | 2.7049280000  |
| C  | -2.1507110000 | -3.7203190000 | 1.3432090000  |
| C  | 2.8505020000  | 1.8148850000  | -0.4188100000 |
| C  | 3.3718890000  | 1.4617130000  | -3.4431620000 |
| C  | 3.7119340000  | -0.9289830000 | -1.5409900000 |
| H  | 2.2622700000  | 2.7215880000  | -0.5846500000 |
| H  | 3.8932950000  | 2.1128830000  | -0.2640990000 |
| H  | 2.4946460000  | 1.3415710000  | 0.5003830000  |
| H  | 3.3491600000  | -1.4301610000 | -0.6410330000 |
| H  | 4.7671380000  | -0.6709270000 | -1.3954320000 |
| H  | 3.6506730000  | -1.6309970000 | -2.3774370000 |
| H  | 2.8393550000  | 2.3954930000  | -3.6428570000 |
| H  | 3.2499220000  | 0.8102220000  | -4.3133970000 |
| H  | 4.4382200000  | 1.6918880000  | -3.3438790000 |
| H  | 0.1116030000  | -4.5248290000 | 3.5468680000  |
| H  | 1.4773620000  | -3.4963460000 | 3.0802700000  |
| H  | 0.9168270000  | -4.7742220000 | 1.9916660000  |
| H  | -1.9073050000 | -4.5156310000 | 0.6328260000  |
| H  | -2.8604300000 | -3.0392450000 | 0.8683660000  |
| H  | -2.6360830000 | -4.1817160000 | 2.2108710000  |
| H  | -1.5251360000 | -1.8684110000 | 4.0108930000  |
| H  | -1.7819360000 | -0.7390840000 | 2.6718020000  |

|   |               |               |               |
|---|---------------|---------------|---------------|
| H | -0.1862050000 | -0.8678550000 | 3.4283950000  |
| H | -5.7574150000 | 0.6896760000  | -3.0389180000 |
| H | -5.5909710000 | -0.0680070000 | -1.4454220000 |
| H | -5.1950020000 | -0.9823190000 | -2.9078900000 |
| H | -3.9226540000 | 3.0046310000  | -1.9218400000 |
| H | -2.2790820000 | 2.6463070000  | -1.3700470000 |
| H | -3.6697360000 | 2.1531180000  | -0.3909500000 |
| H | -1.6391490000 | 1.1685730000  | -4.0461210000 |
| H | -3.2712490000 | 1.5599720000  | -4.6289910000 |
| H | -2.7086570000 | -0.1185810000 | -4.6328060000 |

(Me<sub>3</sub>Si-CO<sub>2</sub>)<sub>3</sub>P<sub>7</sub>

Charge = 0 Multiplicity = 1

|    |               |               |               |
|----|---------------|---------------|---------------|
| P  | 0.3599230000  | 0.0053860000  | -0.7033530000 |
| P  | 1.6909610000  | 0.5813550000  | 0.9586880000  |
| P  | -1.4223530000 | 1.0611320000  | 0.0488600000  |
| P  | -0.1712370000 | -1.9887100000 | 0.0866520000  |
| P  | -1.6658810000 | 0.3053860000  | 2.1438770000  |
| P  | -0.5740050000 | -1.6243980000 | 2.2593300000  |
| P  | 0.4553650000  | 0.2636360000  | 2.8006890000  |
| Si | 1.5162680000  | 4.5721110000  | -0.7946620000 |
| Si | -5.2016460000 | -0.9955140000 | -0.7170520000 |
| Si | 3.9225910000  | -3.0558140000 | -0.9725570000 |
| O  | -3.8051540000 | -0.1356630000 | -0.1301480000 |
| O  | 1.5331840000  | 3.1445720000  | 1.8501870000  |
| O  | 1.8659700000  | -3.4131470000 | 1.1957920000  |
| O  | 1.6450930000  | 2.8861020000  | -0.3785190000 |
| O  | 2.2715500000  | -2.5236480000 | -0.8268660000 |
| O  | -2.6069210000 | -0.2157040000 | -2.0287220000 |
| C  | 1.5825520000  | 2.4497260000  | 0.8697320000  |
| C  | -2.7325670000 | 0.0882090000  | -0.8713910000 |
| C  | 1.5344980000  | -2.7494780000 | 0.2491300000  |
| C  | -6.3011410000 | -1.0038360000 | 0.7852790000  |
| H  | -5.8110840000 | -1.5020720000 | 1.6263280000  |
| H  | -7.2361840000 | -1.5336180000 | 0.5775640000  |
| H  | -6.5523570000 | 0.0141240000  | 1.0957540000  |

|   |               |               |               |
|---|---------------|---------------|---------------|
| C | -0.1144960000 | 5.2022800000  | -0.1519800000 |
| H | -0.9386280000 | 4.5690010000  | -0.4933240000 |
| H | -0.2979010000 | 6.2206930000  | -0.5095450000 |
| H | -0.1237180000 | 5.2129270000  | 0.9403130000  |
| C | 1.5708760000  | 4.5077190000  | -2.6548860000 |
| H | 2.5052480000  | 4.0611090000  | -3.0060480000 |
| H | 1.4986100000  | 5.5144520000  | -3.0783790000 |
| H | 0.7424070000  | 3.9143270000  | -3.0514380000 |
| C | 2.9806830000  | 5.4705480000  | -0.0725650000 |
| H | 2.9707760000  | 5.4067060000  | 1.0180150000  |
| H | 2.9560250000  | 6.5280000000  | -0.3553810000 |
| H | 3.9226480000  | 5.0489460000  | -0.4350840000 |
| C | -4.6577680000 | -2.7068970000 | -1.2124100000 |
| H | -3.9387020000 | -2.6620910000 | -2.0336700000 |
| H | -5.5181240000 | -3.3002420000 | -1.5386640000 |
| H | -4.1880500000 | -3.2299920000 | -0.3744330000 |
| C | -5.9375310000 | -0.0288020000 | -2.1303130000 |
| H | -6.1959450000 | 0.9880530000  | -1.8209120000 |
| H | -6.8529790000 | -0.5134410000 | -2.4850450000 |
| H | -5.2353910000 | 0.0318360000  | -2.9650170000 |
| C | 3.9464420000  | -4.9191850000 | -0.9576780000 |
| H | 3.5612930000  | -5.2997450000 | -0.0087440000 |
| H | 4.9695880000  | -5.2876240000 | -1.0851600000 |
| H | 3.3381340000  | -5.3311290000 | -1.7679950000 |
| C | 4.4012450000  | -2.3515620000 | -2.6286550000 |
| H | 3.7612770000  | -2.7455360000 | -3.4229900000 |
| H | 5.4375130000  | -2.6057640000 | -2.8727470000 |
| H | 4.3112280000  | -1.2617910000 | -2.6315190000 |
| C | 4.8920850000  | -2.3051460000 | 0.4296320000  |
| H | 4.7408070000  | -1.2224320000 | 0.4724980000  |
| H | 5.9625890000  | -2.4946770000 | 0.3005620000  |
| H | 4.5792790000  | -2.7293280000 | 1.3865510000  |

(Me<sub>3</sub>Ge)<sub>3</sub>P<sub>7</sub>

Charge = 0 Multiplicity = 1

|    |              |              |              |
|----|--------------|--------------|--------------|
| Ge | 1.0955870000 | 3.4155550000 | 0.2227350000 |
|----|--------------|--------------|--------------|

|    |               |               |               |
|----|---------------|---------------|---------------|
| Ge | 2.5231990000  | -2.5948730000 | -0.2547310000 |
| P  | -1.1831370000 | -1.4737990000 | -0.0463060000 |
| P  | 1.9318280000  | -0.3831620000 | 0.3172740000  |
| P  | -0.5948570000 | 1.7741630000  | 0.3207640000  |
| P  | 0.1398460000  | 0.0776510000  | -0.8709870000 |
| P  | -1.0477140000 | -1.1148750000 | 2.1369970000  |
| P  | 1.1107920000  | -0.5990710000 | 2.3649640000  |
| P  | -0.4309290000 | 1.0126910000  | 2.3965690000  |
| C  | 2.6146500000  | 3.0938010000  | 1.4073330000  |
| H  | 3.2971060000  | 3.9466410000  | 1.3433320000  |
| H  | 2.2865910000  | 2.9870810000  | 2.4435340000  |
| C  | 0.1742250000  | 5.0664310000  | 0.7287590000  |
| H  | -0.2217170000 | 4.9949190000  | 1.7441790000  |
| H  | 0.8752160000  | 5.9049810000  | 0.6883700000  |
| C  | 1.4736270000  | -3.9750920000 | 0.6442050000  |
| H  | 1.8734960000  | -4.9553590000 | 0.3678590000  |
| H  | 1.5330380000  | -3.8682400000 | 1.7294420000  |
| C  | 1.6714900000  | 3.5087450000  | -1.6441590000 |
| H  | 2.1971820000  | 2.5962630000  | -1.9320840000 |
| H  | 0.8165580000  | 3.6466370000  | -2.3093560000 |
| C  | 2.3436920000  | -2.7355140000 | -2.1971350000 |
| H  | 2.7451940000  | -3.6980410000 | -2.5267090000 |
| H  | 1.2941260000  | -2.6755550000 | -2.4914710000 |
| H  | 4.7844180000  | -3.7238090000 | 0.0091720000  |
| H  | 5.0021470000  | -1.9834650000 | -0.2695390000 |
| C  | -3.3380040000 | -0.1810650000 | -2.4285610000 |
| H  | -2.8971580000 | -0.9422100000 | -3.0756520000 |
| H  | -3.5189750000 | 1.5266570000  | 0.4907540000  |
| C  | 4.4063060000  | -2.7289690000 | 0.2609950000  |
| Ge | -3.3766760000 | -0.7836410000 | -0.5681950000 |
| C  | -4.0945940000 | 0.6065740000  | 0.6012380000  |
| H  | -4.0657680000 | 0.2924160000  | 1.6468400000  |
| C  | -4.4370860000 | -2.4209420000 | -0.4104960000 |
| H  | -4.4018980000 | -2.8100090000 | 0.6094700000  |
| H  | -5.4794630000 | -2.2089070000 | -0.6647880000 |
| H  | -2.7588520000 | 0.7393920000  | -2.5241220000 |

|   |               |               |               |
|---|---------------|---------------|---------------|
| H | 0.4289380000  | -3.9141100000 | 0.3366350000  |
| H | 2.8958770000  | -1.9382840000 | -2.6989650000 |
| H | 4.5274890000  | -2.5738790000 | 1.3353080000  |
| H | -4.0600520000 | -3.1874050000 | -1.0906700000 |
| H | -4.3604520000 | 0.0122940000  | -2.7655050000 |
| H | -5.1356710000 | 0.7963810000  | 0.3231490000  |
| H | -0.6522430000 | 5.2679640000  | 0.0442040000  |
| H | 2.3501750000  | 4.3572760000  | -1.7694410000 |
| H | 3.1424560000  | 2.1877650000  | 1.1067890000  |

(Me<sub>3</sub>Ge-CO<sub>2</sub>)<sub>3</sub>P<sub>7</sub>

Charge = 0 Multiplicity = 1

|    |               |               |               |
|----|---------------|---------------|---------------|
| P  | 0.3002470000  | 0.0079240000  | -0.6212870000 |
| P  | 1.7731180000  | 0.3554930000  | 0.9846670000  |
| P  | -1.2661140000 | 1.3463030000  | 0.1740860000  |
| P  | -0.5455400000 | -1.8593260000 | 0.1981050000  |
| P  | -1.5393640000 | 0.6570640000  | 2.2877560000  |
| P  | -0.7970820000 | -1.4318670000 | 2.3810270000  |
| P  | 0.5651000000  | 0.2503480000  | 2.8679010000  |
| Ge | 2.0649760000  | 4.4981250000  | -0.6689660000 |
| Ge | -5.2275280000 | -0.6178150000 | -0.6093840000 |
| Ge | 3.4319480000  | -3.6734990000 | -0.7480340000 |
| O  | -3.7167350000 | 0.2514180000  | 0.1125500000  |
| O  | 2.0279490000  | 2.9178910000  | 1.8640040000  |
| O  | 1.1700990000  | -3.7084730000 | 1.2057050000  |
| O  | 2.0367940000  | 2.6374290000  | -0.3614430000 |
| O  | 1.7800820000  | -2.7643850000 | -0.7357840000 |
| O  | -2.7259970000 | 0.4011290000  | -1.8945190000 |
| C  | 1.9512930000  | 2.2233530000  | 0.8797670000  |
| C  | -2.7303570000 | 0.5492840000  | -0.6962820000 |
| C  | 0.9937660000  | -2.9299840000 | 0.3001910000  |
| C  | -6.2269000000 | -0.9071240000 | 1.0279020000  |
| H  | -5.6537680000 | -1.5336190000 | 1.7140640000  |
| H  | -6.4363310000 | 0.0463960000  | 1.5165660000  |
| C  | 0.4598470000  | 5.2034500000  | 0.1605660000  |
| H  | -0.3750730000 | 4.5259770000  | -0.0342200000 |



|   |               |               |               |
|---|---------------|---------------|---------------|
| H | 0.5986980000  | 5.2881140000  | 1.2385450000  |
| C | 1.9983640000  | 4.4887740000  | -2.6079830000 |
| H | 2.0198320000  | 5.5115300000  | -2.9932480000 |
| H | 1.0810310000  | 4.0052500000  | -2.9493900000 |
| C | 3.7402170000  | 5.1646940000  | 0.0499070000  |
| H | 3.7642840000  | 5.0070310000  | 1.1287420000  |
| H | 4.5840550000  | 4.6448610000  | -0.4084120000 |
| C | -4.5789990000 | -2.2507700000 | -1.4313110000 |
| H | -5.4146140000 | -2.9284680000 | -1.6254900000 |
| H | -3.8710870000 | -2.7464910000 | -0.7634520000 |
| C | -6.0700160000 | 0.6407360000  | -1.8235250000 |
| H | -6.9873370000 | 0.2066170000  | -2.2304230000 |
| H | -5.3885330000 | 0.8709540000  | -2.6431930000 |
| C | 3.0363810000  | -5.5709600000 | -0.8459620000 |
| H | 3.9660920000  | -6.1403880000 | -0.9295290000 |
| H | 2.4181710000  | -5.7846020000 | -1.7203540000 |
| C | 4.1707580000  | -2.9478600000 | -2.3889970000 |
| H | 5.1598780000  | -3.3722520000 | -2.5799620000 |
| H | 4.2646280000  | -1.8630090000 | -2.3107790000 |
| C | 4.3718480000  | -3.0988880000 | 0.8481310000  |
| H | 4.3036720000  | -2.0125410000 | 0.9409000000  |
| H | 3.9249830000  | -3.5568040000 | 1.7309200000  |
| H | 3.5206030000  | -3.1834370000 | -3.2337770000 |
| H | 2.5047720000  | -5.8815300000 | 0.0540380000  |
| H | 5.4258160000  | -3.3823050000 | 0.7849470000  |
| H | 3.8350430000  | 6.2337420000  | -0.1591250000 |
| H | 0.2226810000  | 6.1858500000  | -0.2561590000 |
| H | 2.8535470000  | 3.9449720000  | -3.0139570000 |
| H | -7.1758190000 | -1.4041010000 | 0.8100310000  |
| H | -6.3253920000 | 1.5629870000  | -1.2976480000 |
| H | -4.0707450000 | -2.0201100000 | -2.3677270000 |

(Et<sub>3</sub>Ge)<sub>3</sub>P<sub>7</sub>

Charge = 0 Multiplicity = 1

|    |              |               |               |
|----|--------------|---------------|---------------|
| Ge | 0.9799370000 | 3.3755630000  | -0.0179720000 |
| Ge | 2.6833750000 | -2.5263210000 | -0.4231440000 |

|   |               |               |               |
|---|---------------|---------------|---------------|
| P | -1.2654280000 | -1.5430750000 | 0.1628510000  |
| P | 1.8656110000  | -0.3949470000 | 0.1813160000  |
| P | -0.6668150000 | 1.7111990000  | 0.3139770000  |
| P | -0.0283320000 | -0.0341130000 | -0.8627040000 |
| P | -0.9196080000 | -1.0842930000 | 2.2994060000  |
| P | 1.2451590000  | -0.5493210000 | 2.2981750000  |
| P | -0.3028640000 | 1.0573580000  | 2.3967330000  |
| C | 2.5356970000  | 3.3084720000  | 1.1983070000  |
| H | 2.6488700000  | 4.3281400000  | 1.5846800000  |
| H | 2.2689460000  | 2.6853510000  | 2.0573030000  |
| C | -0.0232060000 | 5.0369120000  | 0.3287740000  |
| H | -0.3357120000 | 5.0196530000  | 1.3785830000  |
| H | 0.6946320000  | 5.8609310000  | 0.2362490000  |
| C | 1.3486630000  | -3.8866880000 | -0.9068820000 |
| H | 1.8707710000  | -4.8481590000 | -0.8205730000 |
| H | 0.5583830000  | -3.8818980000 | -0.1516520000 |
| C | 1.4819450000  | 3.2854720000  | -1.9207800000 |
| H | 2.1358600000  | 2.4180910000  | -2.0535130000 |
| H | 0.5738300000  | 3.0772570000  | -2.4955540000 |
| C | 3.8442950000  | -2.1206670000 | -1.9635030000 |
| H | 4.1615170000  | -3.0846960000 | -2.3800070000 |
| H | 3.2350310000  | -1.6372670000 | -2.7343050000 |
| H | 4.5369840000  | -3.8259990000 | 0.6332140000  |
| H | 4.3518740000  | -2.3004680000 | 1.4783340000  |
| C | -3.5806530000 | -0.2560710000 | -2.0623660000 |
| H | -3.1316730000 | -1.0498100000 | -2.6682690000 |
| H | -4.4123520000 | -3.2815260000 | -1.9089140000 |
| C | 3.8369130000  | 2.8241120000  | 0.5683910000  |
| H | 4.6499180000  | 2.8198780000  | 1.3018660000  |
| H | 3.7283380000  | 1.8056080000  | 0.1874290000  |
| H | 4.1505220000  | 3.4629590000  | -0.2623250000 |
| C | 0.7561920000  | -3.7252790000 | -2.3022930000 |
| H | 0.0450300000  | -4.5276620000 | -2.5237760000 |
| H | 0.2172500000  | -2.7786370000 | -2.4025770000 |
| H | 1.5280450000  | -3.7483070000 | -3.0774740000 |
| C | -1.2210740000 | 5.2545460000  | -0.5884130000 |

|    |               |               |               |
|----|---------------|---------------|---------------|
| H  | -1.7450550000 | 6.1863230000  | -0.3520100000 |
| H  | -0.9201700000 | 5.3066000000  | -1.6395850000 |
| H  | -1.9433880000 | 4.4377400000  | -0.4973830000 |
| C  | 5.0550630000  | -1.2614460000 | -1.6145450000 |
| H  | 5.6694100000  | -1.0577330000 | -2.4974740000 |
| H  | 4.7515350000  | -0.2972670000 | -1.1954030000 |
| H  | 5.6966020000  | -1.7514790000 | -0.8760240000 |
| C  | 2.1532750000  | 4.5605480000  | -2.4264220000 |
| H  | 2.4189070000  | 4.4754140000  | -3.4852330000 |
| H  | 1.4966370000  | 5.4300580000  | -2.3248830000 |
| H  | 3.0742400000  | 4.7839770000  | -1.8791100000 |
| C  | -5.0001100000 | 0.0455090000  | -2.5377070000 |
| H  | -5.0152500000 | 0.3090500000  | -3.6003840000 |
| H  | -5.6645530000 | -0.8144850000 | -2.4066540000 |
| H  | -5.4381330000 | 0.8855360000  | -1.9905730000 |
| C  | 3.0287800000  | -3.8662210000 | 2.1899900000  |
| H  | 3.7076560000  | -4.2322050000 | 2.9669210000  |
| H  | 2.3124320000  | -3.1974990000 | 2.6765310000  |
| H  | 2.4713260000  | -4.7275230000 | 1.8101460000  |
| H  | -3.7228460000 | 1.5610760000  | 0.6286510000  |
| C  | -5.5919250000 | 0.6464450000  | 1.2786440000  |
| H  | -5.8694430000 | 1.4731020000  | 1.9408260000  |
| H  | -6.1496210000 | 0.7772200000  | 0.3464830000  |
| H  | -5.9486720000 | -0.2760800000 | 1.7458510000  |
| C  | 3.7938440000  | -3.1535300000 | 1.0799100000  |
| Ge | -3.4894990000 | -0.8118770000 | -0.1740740000 |
| C  | -4.0820850000 | 0.6174120000  | 1.0487410000  |
| H  | -3.5592580000 | 0.4884360000  | 2.0014540000  |
| C  | -4.5544990000 | -2.4473180000 | 0.1002640000  |
| H  | -4.4057310000 | -2.7712760000 | 1.1359930000  |
| H  | -5.6097560000 | -2.1638120000 | 0.0152920000  |
| C  | -4.2204240000 | -3.5741330000 | -0.8717460000 |
| H  | -4.8191030000 | -4.4680410000 | -0.6692710000 |
| H  | -3.1664390000 | -3.8599450000 | -0.8031420000 |
| H  | -2.9394200000 | 0.6231260000  | -2.1801560000 |

(Et<sub>3</sub>Ge-CO<sub>2</sub>)<sub>3</sub>P<sub>7</sub>

Charge = 0 Multiplicity = 1

|    |               |               |               |
|----|---------------|---------------|---------------|
| P  | 0.2880030000  | -0.0332110000 | -0.4534340000 |
| P  | 1.7550310000  | 0.2830030000  | 1.1641820000  |
| P  | -1.2995580000 | 1.2576350000  | 0.3792300000  |
| P  | -0.5434730000 | -1.9327450000 | 0.3001730000  |
| P  | -1.5630780000 | 0.5016360000  | 2.4716750000  |
| P  | -0.8004310000 | -1.5820860000 | 2.4970680000  |
| P  | 0.5448280000  | 0.0980500000  | 3.0401600000  |
| Ge | 1.9077310000  | 4.4903610000  | -0.3460210000 |
| Ge | -5.2057930000 | -0.8052880000 | -0.4565060000 |
| Ge | 3.5518810000  | -3.5327090000 | -0.5925160000 |
| O  | -3.7343110000 | 0.1319380000  | 0.2823900000  |
| O  | 1.9838590000  | 2.8171330000  | 2.1275840000  |
| O  | 1.1223010000  | -3.8717310000 | 1.2017400000  |
| O  | 1.9570850000  | 2.6148850000  | -0.1059740000 |
| O  | 1.8359350000  | -2.7331930000 | -0.5966220000 |
| O  | -2.7271440000 | 0.3182970000  | -1.7128700000 |
| C  | 1.9030440000  | 2.1566950000  | 1.1201400000  |
| C  | -2.7475130000 | 0.4538780000  | -0.5122470000 |
| C  | 0.9961350000  | -3.0073360000 | 0.3681610000  |
| C  | -6.1907940000 | -1.1256640000 | 1.1984660000  |
| H  | -5.5722320000 | -1.7688070000 | 1.8322300000  |
| C  | -7.5664820000 | -1.7477940000 | 0.9673950000  |
| H  | -6.2775010000 | -0.1678880000 | 1.7204970000  |
| C  | 0.2899760000  | 5.1048850000  | 0.5626800000  |
| H  | -0.4170270000 | 4.2689710000  | 0.5230360000  |
| C  | -0.3269860000 | 6.3619150000  | -0.0486860000 |
| H  | 0.5369000000  | 5.2527750000  | 1.6171880000  |
| C  | 1.7741640000  | 4.5362590000  | -2.2942950000 |
| C  | 2.9513700000  | 3.8718640000  | -3.0035000000 |
| H  | 1.6754690000  | 5.5839040000  | -2.6013290000 |
| H  | 0.8329100000  | 4.0452710000  | -2.5626640000 |
| C  | 3.6042880000  | 5.1843530000  | 0.3328220000  |
| H  | 3.6326210000  | 4.9721940000  | 1.4046380000  |
| C  | 3.7906640000  | 6.6755240000  | 0.0563050000  |

|   |               |               |               |
|---|---------------|---------------|---------------|
| H | 4.4081090000  | 4.6012570000  | -0.1279590000 |
| C | -4.4904550000 | -2.4318180000 | -1.2758710000 |
| C | -4.3618240000 | -2.3935150000 | -2.7958440000 |
| H | -5.1378810000 | -3.2569100000 | -0.9563200000 |
| H | -3.5140790000 | -2.6065360000 | -0.8105360000 |
| C | -6.1106050000 | 0.4325570000  | -1.6679360000 |
| C | -6.5447890000 | 1.7361820000  | -1.0038910000 |
| H | -6.9749670000 | -0.1000820000 | -2.0825920000 |
| H | -5.4291600000 | 0.6226800000  | -2.5012880000 |
| C | 3.3364020000  | -5.4270880000 | -1.0354650000 |
| C | 3.1465380000  | -6.3619520000 | 0.1551960000  |
| H | 4.2231980000  | -5.7083240000 | -1.6166640000 |
| H | 2.4885490000  | -5.4936370000 | -1.7253790000 |
| C | 4.3331500000  | -2.4999060000 | -2.0539820000 |
| C | 3.5943050000  | -2.6586870000 | -3.3806390000 |
| H | 5.3818110000  | -2.8038340000 | -2.1532420000 |
| H | 4.3411290000  | -1.4517940000 | -1.7371380000 |
| C | 4.3271330000  | -3.1324040000 | 1.1539010000  |
| H | 4.0731830000  | -2.0910450000 | 1.3782440000  |
| C | 5.8390290000  | -3.3487440000 | 1.2031500000  |
| H | 3.8129270000  | -3.7485130000 | 1.8956860000  |
| H | -8.2044420000 | -1.1046010000 | 0.3527650000  |
| H | -8.0910240000 | -1.9151150000 | 1.9128220000  |
| H | -7.4973840000 | -2.7168740000 | 0.4627150000  |
| H | -7.0426790000 | 2.3974720000  | -1.7196050000 |
| H | -5.6890840000 | 2.2809970000  | -0.5954510000 |
| H | -7.2439440000 | 1.5609150000  | -0.1804200000 |
| H | -5.3292170000 | -2.2345560000 | -3.2823860000 |
| H | -3.9570350000 | -3.3366380000 | -3.1758070000 |
| H | -3.6919650000 | -1.5897480000 | -3.1082780000 |
| H | 0.3524690000  | 7.2189380000  | -0.0047890000 |
| H | -1.2391110000 | 6.6468690000  | 0.4844090000  |
| H | -0.5984970000 | 6.2119300000  | -1.0978650000 |
| H | 3.8970430000  | 4.3724170000  | -2.7729550000 |
| H | 2.8258050000  | 3.8971310000  | -4.0902850000 |
| H | 3.0501100000  | 2.8246830000  | -2.7058780000 |

|   |              |               |               |
|---|--------------|---------------|---------------|
| H | 4.7583620000 | 7.0278960000  | 0.4260890000  |
| H | 3.0205800000 | 7.2784870000  | 0.5473320000  |
| H | 3.7516760000 | 6.9009150000  | -1.0142850000 |
| H | 6.2365700000 | -3.1056250000 | 2.1930590000  |
| H | 6.3650590000 | -2.7183740000 | 0.4796230000  |
| H | 6.1123000000 | -4.3881930000 | 0.9937840000  |
| H | 4.0563340000 | -2.0541070000 | -4.1671370000 |
| H | 2.5515560000 | -2.3435930000 | -3.2904830000 |
| H | 3.5983120000 | -3.6978690000 | -3.7239610000 |
| H | 3.0234730000 | -7.3977840000 | -0.1760820000 |
| H | 2.2672280000 | -6.0831450000 | 0.7391450000  |
| H | 4.0092280000 | -6.3358310000 | 0.8279560000  |

(<sup>119</sup>Bu<sub>3</sub>Sn)<sub>3</sub>P<sub>7</sub>

Charge = 0 Multiplicity = 1

|    |               |               |               |
|----|---------------|---------------|---------------|
| Sn | -3.3690750000 | -0.8758170000 | -0.1585650000 |
| Sn | 2.7914750000  | -2.2937890000 | -0.1442050000 |
| P  | 1.6453470000  | 1.3748840000  | -0.6754660000 |
| P  | 0.3377740000  | -1.7006130000 | -0.6023260000 |
| P  | -1.6494020000 | 0.9653850000  | -0.6472410000 |
| P  | 0.1245660000  | 0.2312050000  | 0.4245090000  |
| P  | 1.0595250000  | 1.0301690000  | -2.7820470000 |
| P  | 0.3809870000  | -1.0959770000 | -2.7308860000 |
| P  | -1.1244440000 | 0.5546050000  | -2.7596590000 |
| Sn | 0.8595390000  | 3.7879130000  | -0.2956010000 |
| C  | 5.1908570000  | -7.3169930000 | 0.9453150000  |
| H  | 5.1605150000  | -8.4050280000 | 0.8396750000  |
| H  | 5.1939260000  | -7.0879270000 | 2.0160160000  |
| C  | 4.0134780000  | -6.6536710000 | 0.2443420000  |
| H  | 6.1437180000  | -6.9703970000 | 0.5319740000  |
| H  | 4.0134730000  | -6.9253130000 | -0.8187300000 |
| C  | 4.0212680000  | -5.1320640000 | 0.3671250000  |
| H  | 3.0717700000  | -7.0391150000 | 0.6549510000  |
| H  | 4.9667030000  | -4.7510600000 | -0.0414980000 |
| H  | 4.0288320000  | -4.8637240000 | 1.4322780000  |
| C  | 2.8368740000  | -4.4663500000 | -0.3305880000 |

|   |               |               |               |
|---|---------------|---------------|---------------|
| H | 2.8320220000  | -4.7083650000 | -1.3991960000 |
| H | 1.8919530000  | -4.8421010000 | 0.0772350000  |
| C | 1.3591710000  | -2.5058670000 | 5.3243570000  |
| H | 1.5612470000  | -2.2021190000 | 6.3553400000  |
| H | 1.3753750000  | -3.6003190000 | 5.2918870000  |
| C | 2.3725660000  | -1.9117610000 | 4.3559690000  |
| H | 0.3421670000  | -2.1838290000 | 5.0771030000  |
| H | 2.3568000000  | -0.8171870000 | 4.4284140000  |
| C | 2.1197300000  | -2.3139780000 | 2.9058470000  |
| H | 3.3856770000  | -2.2210330000 | 4.6431710000  |
| H | 1.1044870000  | -2.0024030000 | 2.6271600000  |
| H | 2.1280290000  | -3.4101950000 | 2.8345400000  |
| C | 3.1266070000  | -1.7151810000 | 1.9280930000  |
| H | 3.1011070000  | -0.6209100000 | 1.9663080000  |
| H | 4.1474540000  | -2.0179580000 | 2.1912370000  |
| C | 8.0340730000  | -1.4886680000 | -2.1123460000 |
| H | 8.6990680000  | -0.9576930000 | -2.7991530000 |
| H | 8.1486000000  | -2.5608510000 | -2.3030030000 |
| C | 6.5864830000  | -1.0503300000 | -2.2848090000 |
| H | 8.3868490000  | -1.2958160000 | -1.0938350000 |
| H | 6.5030320000  | 0.0310060000  | -2.1202280000 |
| C | 5.6259220000  | -1.7690310000 | -1.3402930000 |
| H | 6.2656350000  | -1.2248100000 | -3.3192390000 |
| H | 5.9560280000  | -1.5969510000 | -0.3066720000 |
| H | 5.7118900000  | -2.8510930000 | -1.5070420000 |
| C | 4.1762270000  | -1.3213760000 | -1.5124880000 |
| H | 4.0741930000  | -0.2457260000 | -1.3393240000 |
| H | 3.8310640000  | -1.5149580000 | -2.5339660000 |
| C | -5.5843360000 | -5.4543050000 | -2.6413760000 |
| H | -5.4544920000 | -6.2958930000 | -3.3274930000 |
| H | -6.4250410000 | -4.8556260000 | -3.0071240000 |
| C | -4.3169420000 | -4.6175180000 | -2.5374970000 |
| H | -5.8702350000 | -5.8626370000 | -1.6663810000 |
| H | -3.4828080000 | -5.2461520000 | -2.2019790000 |
| C | -4.4578960000 | -3.4316560000 | -1.5860970000 |
| H | -4.0348720000 | -4.2453380000 | -3.5301660000 |

|   |               |               |               |
|---|---------------|---------------|---------------|
| H | -4.7461530000 | -3.8083840000 | -0.5953180000 |
| H | -5.2949370000 | -2.8062550000 | -1.9243590000 |
| C | -3.1849320000 | -2.5952320000 | -1.4827990000 |
| H | -2.3437230000 | -3.1898100000 | -1.1144160000 |
| H | -2.8926980000 | -2.2178600000 | -2.4689580000 |
| C | -3.8547920000 | -4.5075970000 | 4.1662310000  |
| H | -3.6718560000 | -4.7266770000 | 5.2219030000  |
| H | -3.3524140000 | -5.2803230000 | 3.5751690000  |
| C | -3.3586290000 | -3.1187230000 | 3.7887930000  |
| H | -4.9309170000 | -4.6052580000 | 3.9891970000  |
| H | -3.8546830000 | -2.3648370000 | 4.4129690000  |
| C | -3.5898450000 | -2.7777850000 | 2.3189250000  |
| H | -2.2864610000 | -3.0356170000 | 4.0074190000  |
| H | -4.6629080000 | -2.8653290000 | 2.1009450000  |
| H | -3.0945860000 | -3.5365930000 | 1.6987740000  |
| C | -3.0841560000 | -1.3870980000 | 1.9419570000  |
| H | -3.5901830000 | -0.6167550000 | 2.5348100000  |
| H | -2.0146650000 | -1.2983700000 | 2.1594760000  |
| C | -8.9236600000 | -0.4556160000 | 0.9008180000  |
| H | -9.8612870000 | 0.0878210000  | 0.7544780000  |
| H | -8.7240570000 | -0.4883110000 | 1.9769710000  |
| C | -7.7738560000 | 0.1990420000  | 0.1478030000  |
| H | -9.0814040000 | -1.4854460000 | 0.5639260000  |
| H | -8.0118480000 | 0.2488630000  | -0.9220790000 |
| C | -6.4458370000 | -0.5325500000 | 0.3265060000  |
| H | -7.6558500000 | 1.2380250000  | 0.4802080000  |
| H | -6.5713060000 | -1.5730130000 | -0.0016250000 |
| H | -6.2130050000 | -0.5840390000 | 1.3987710000  |
| C | -5.2903310000 | 0.1235570000  | -0.4268020000 |
| H | -5.5023070000 | 0.1627060000  | -1.5012090000 |
| H | -5.1592710000 | 1.1601600000  | -0.0967110000 |
| C | -4.3479370000 | 5.5172520000  | -1.7099030000 |
| H | -5.0390340000 | 5.8535550000  | -2.4879560000 |
| H | -4.3240120000 | 6.2876340000  | -0.9319020000 |
| C | -2.9563030000 | 5.2572060000  | -2.2700080000 |
| H | -4.7673640000 | 4.6101870000  | -1.2623080000 |



|   |               |              |               |
|---|---------------|--------------|---------------|
| H | -3.0127810000 | 4.5068320000 | -3.0684630000 |
| C | -1.9695810000 | 4.7751480000 | -1.2102650000 |
| H | -2.5677390000 | 6.1704520000 | -2.7383830000 |
| H | -2.3614310000 | 3.8585570000 | -0.7521700000 |
| H | -1.9185260000 | 5.5224390000 | -0.4067130000 |
| C | -0.5769710000 | 4.5053020000 | -1.7715610000 |
| H | -0.6257040000 | 3.7642950000 | -2.5758830000 |
| H | -0.1480080000 | 5.4150070000 | -2.2076920000 |
| C | 6.1797880000  | 4.6079980000 | 1.4173080000  |
| H | 7.1210520000  | 5.1563090000 | 1.3203310000  |
| H | 6.3907290000  | 3.5498000000 | 1.2315530000  |
| C | 5.1229770000  | 5.1327030000 | 0.4552600000  |
| H | 5.8483050000  | 4.6993600000 | 2.4569560000  |
| H | 4.9473820000  | 6.1996110000 | 0.6428280000  |
| C | 3.7976960000  | 4.3824840000 | 0.5562120000  |
| H | 5.4931510000  | 5.0634230000 | -0.5753210000 |
| H | 3.4322470000  | 4.4473760000 | 1.5904980000  |
| H | 3.9773810000  | 3.3148390000 | 0.3717560000  |
| C | 2.7318720000  | 4.8978750000 | -0.4063870000 |
| H | 2.5027360000  | 5.9514400000 | -0.2060590000 |
| H | 3.0892200000  | 4.8462890000 | -1.4410260000 |
| C | -0.3535220000 | 6.7662720000 | 4.3446240000  |
| H | -0.7298720000 | 6.7862660000 | 5.3711900000  |
| H | -0.9661810000 | 7.4549650000 | 3.7535970000  |
| C | -0.3898020000 | 5.3601690000 | 3.7625490000  |
| H | 0.6671900000  | 7.1625650000 | 4.3578040000  |
| H | 0.2024680000  | 4.6825840000 | 4.3901840000  |
| C | 0.1334160000  | 5.2913000000 | 2.3297190000  |
| H | -1.4166080000 | 4.9746790000 | 3.7856480000  |
| H | 1.1590660000  | 5.6837290000 | 2.3088930000  |
| H | -0.4588780000 | 5.9752140000 | 1.7065840000  |
| C | 0.1000460000  | 3.8816810000 | 1.7438750000  |
| H | 0.6977830000  | 3.1957840000 | 2.3535330000  |
| H | -0.9208080000 | 3.4855660000 | 1.7347520000  |

(<sup>13</sup>Bu<sub>3</sub>Sn-CO<sub>2</sub>)<sub>3</sub>P<sub>7</sub>

Charge = 0 Multiplicity = 1

|    |               |               |               |
|----|---------------|---------------|---------------|
| P  | -0.4021660000 | 0.1008280000  | 0.1553040000  |
| P  | -1.4348630000 | 1.4892810000  | -1.2130090000 |
| P  | 1.6310610000  | 0.4230090000  | -0.6413820000 |
| P  | -0.8204770000 | -1.7431750000 | -0.9856920000 |
| P  | 1.4173270000  | 0.0591970000  | -2.8403820000 |
| P  | -0.4048310000 | -1.1784030000 | -3.1120620000 |
| P  | -0.5442200000 | 1.0332300000  | -3.2209080000 |
| O  | 3.1009400000  | -1.8102650000 | -0.9460290000 |
| O  | -0.3344720000 | 3.9305270000  | -1.6812080000 |
| O  | -3.3280070000 | -1.9566710000 | -2.0240820000 |
| O  | -0.0691750000 | 3.1334070000  | 0.3882330000  |
| O  | -3.2185270000 | -1.3217090000 | 0.1076880000  |
| O  | 2.2237440000  | -1.5679480000 | 1.0861990000  |
| C  | -0.4878260000 | 3.0706900000  | -0.8397240000 |
| C  | 2.3867220000  | -1.1914910000 | -0.0610890000 |
| C  | -2.6944420000 | -1.6667110000 | -1.0279260000 |
| Sn | -5.3144290000 | -1.0812120000 | -0.0923710000 |
| C  | -5.1340200000 | -1.9943110000 | 5.4658920000  |
| H  | -5.2865220000 | -1.6172740000 | 6.4810210000  |
| H  | -4.0850400000 | -2.2946780000 | 5.3770470000  |
| C  | -5.4951050000 | -0.9487320000 | 4.4200210000  |
| H  | -5.7453120000 | -2.8956230000 | 5.3516070000  |
| H  | -6.5414240000 | -0.6425720000 | 4.5467390000  |
| C  | -5.2883180000 | -1.4391360000 | 2.9897180000  |
| H  | -4.8929850000 | -0.0451160000 | 4.5765670000  |
| H  | -5.8849250000 | -2.3494270000 | 2.8390840000  |
| H  | -4.2409810000 | -1.7418900000 | 2.8654010000  |
| C  | -5.6514940000 | -0.3950800000 | 1.9354380000  |
| H  | -6.7016880000 | -0.0954290000 | 2.0325420000  |
| H  | -5.0537680000 | 0.5129750000  | 2.0717820000  |
| C  | -7.9268010000 | 3.5114430000  | -2.1436890000 |
| H  | -7.9753430000 | 4.2762470000  | -2.9236430000 |
| H  | -7.7898010000 | 4.0234770000  | -1.1855580000 |
| C  | -6.8007880000 | 2.5205330000  | -2.4030660000 |
| H  | -8.8987060000 | 3.0078080000  | -2.1123070000 |

|    |                |               |               |
|----|----------------|---------------|---------------|
| H  | -6.9426420000  | 2.0439950000  | -3.3809250000 |
| C  | -6.6982900000  | 1.4366720000  | -1.3332020000 |
| H  | -5.8432140000  | 3.0521510000  | -2.4617130000 |
| H  | -7.6598150000  | 0.9079670000  | -1.2751280000 |
| H  | -6.5618660000  | 1.9177460000  | -0.3556210000 |
| C  | -5.5623330000  | 0.4515180000  | -1.5992060000 |
| H  | -5.6905820000  | -0.0535240000 | -2.5611020000 |
| H  | -4.5994200000  | 0.9733510000  | -1.6455890000 |
| C  | -9.7590980000  | -4.5571980000 | -0.2467650000 |
| H  | -10.1478350000 | -5.5650040000 | -0.4164720000 |
| H  | -10.2805960000 | -3.8812850000 | -0.9323570000 |
| C  | -8.2525760000  | -4.4973850000 | -0.4559920000 |
| H  | -10.0293510000 | -4.2649570000 | 0.7732480000  |
| H  | -7.7549130000  | -5.2054370000 | 0.2183080000  |
| C  | -7.6710540000  | -3.1044340000 | -0.2277580000 |
| H  | -8.0050780000  | -4.8230070000 | -1.4737620000 |
| H  | -7.9193410000  | -2.7817260000 | 0.7925950000  |
| H  | -8.1818350000  | -2.3992360000 | -0.8978040000 |
| C  | -6.1606020000  | -3.0428530000 | -0.4481100000 |
| H  | -5.6453030000  | -3.7429130000 | 0.2186860000  |
| H  | -5.8947310000  | -3.3242920000 | -1.4708070000 |
| Sn | 1.2614280000   | 4.7370390000  | 0.7388310000  |
| C  | 0.7579890000   | 10.3397210000 | 1.2925880000  |
| H  | 0.1112330000   | 11.2211030000 | 1.2717180000  |
| H  | 1.5551320000   | 10.4963000000 | 0.5585630000  |
| C  | -0.0222370000  | 9.0673890000  | 0.9933900000  |
| H  | 1.2249940000   | 10.2946280000 | 2.2819420000  |
| H  | -0.8331930000  | 8.9480710000  | 1.7226120000  |
| C  | 0.8477490000   | 7.8132080000  | 1.0121610000  |
| H  | -0.5057850000  | 9.1494430000  | 0.0122690000  |
| H  | 1.3321380000   | 7.7367730000  | 1.9952320000  |
| H  | 1.6611190000   | 7.9396120000  | 0.2849710000  |
| C  | 0.0618390000   | 6.5388440000  | 0.7062050000  |
| H  | -0.7522920000  | 6.4064160000  | 1.4269240000  |
| H  | -0.3932170000  | 6.5864680000  | -0.2877470000 |
| C  | 3.8316920000   | 0.8581600000  | 3.8594700000  |

|    |              |               |               |
|----|--------------|---------------|---------------|
| H  | 4.0145820000 | 0.4135720000  | 4.8419400000  |
| H  | 4.8058520000 | 1.0520910000  | 3.3978140000  |
| C  | 3.0139850000 | 2.1383380000  | 3.9695810000  |
| H  | 3.3158970000 | 0.1140740000  | 3.2440580000  |
| H  | 2.0660640000 | 1.9278830000  | 4.4804020000  |
| C  | 2.7117230000 | 2.7604690000  | 2.6099960000  |
| H  | 3.5422710000 | 2.8697140000  | 4.5949040000  |
| H  | 2.1950670000 | 2.0147300000  | 1.9932830000  |
| H  | 3.6588240000 | 2.9647290000  | 2.0926090000  |
| C  | 1.8807580000 | 4.0408220000  | 2.6942920000  |
| H  | 0.9629070000 | 3.8670680000  | 3.2669930000  |
| H  | 2.4315370000 | 4.8334160000  | 3.2128850000  |
| C  | 6.5125020000 | 5.7163110000  | -1.1443040000 |
| H  | 7.2682420000 | 5.5368090000  | -1.9139170000 |
| H  | 6.9209000000 | 5.3658360000  | -0.1906520000 |
| C  | 5.2028770000 | 5.0137760000  | -1.4732110000 |
| H  | 6.3719750000 | 6.7993380000  | -1.0644140000 |
| H  | 4.8301440000 | 5.3574070000  | -2.4459340000 |
| C  | 4.1207700000 | 5.2395490000  | -0.4203390000 |
| H  | 5.3750320000 | 3.9355970000  | -1.5788400000 |
| H  | 3.9543700000 | 6.3204120000  | -0.3149730000 |
| H  | 4.5004770000 | 4.8988970000  | 0.5524660000  |
| C  | 2.8108430000 | 4.5296050000  | -0.7576040000 |
| H  | 2.3980140000 | 4.8855320000  | -1.7055820000 |
| H  | 2.9724340000 | 3.4511830000  | -0.8675420000 |
| Sn | 3.7079600000 | -3.7141350000 | -0.2246880000 |
| C  | 7.8672850000 | -5.5393850000 | 3.1244980000  |
| H  | 8.5567120000 | -5.3351850000 | 3.9482510000  |
| H  | 8.4680050000 | -5.7875250000 | 2.2433030000  |
| C  | 6.9554220000 | -4.3513240000 | 2.8525480000  |
| H  | 7.2885270000 | -6.4300360000 | 3.3902190000  |
| H  | 6.3871200000 | -4.1037780000 | 3.7575310000  |
| C  | 5.9781920000 | -4.5959680000 | 1.7056320000  |
| H  | 7.5588930000 | -3.4646880000 | 2.6215130000  |
| H  | 5.3825880000 | -5.4895760000 | 1.9377730000  |
| H  | 6.5508770000 | -4.8443990000 | 0.8016060000  |

|   |               |               |               |
|---|---------------|---------------|---------------|
| C | 5.0597530000  | -3.4050180000 | 1.4386730000  |
| H | 4.4503560000  | -3.1666170000 | 2.3148280000  |
| H | 5.6461830000  | -2.5084990000 | 1.2093510000  |
| C | -0.4728660000 | -5.4869700000 | 3.1736590000  |
| H | -1.4805810000 | -5.9045680000 | 3.2530930000  |
| H | -0.4862040000 | -4.4945780000 | 3.6356140000  |
| C | -0.0123710000 | -5.4079210000 | 1.7248940000  |
| H | 0.1955940000  | -6.1185380000 | 3.7684030000  |
| H | -0.0331560000 | -6.4079740000 | 1.2730470000  |
| C | 1.3859000000  | -4.8141410000 | 1.5760880000  |
| H | -0.7143000000 | -4.7952710000 | 1.1455570000  |
| H | 2.0952270000  | -5.4131370000 | 2.1633070000  |
| H | 1.3944330000  | -3.8096290000 | 2.0129430000  |
| C | 1.8345620000  | -4.7407200000 | 0.1192700000  |
| H | 1.9037180000  | -5.7395010000 | -0.3263590000 |
| H | 1.0991220000  | -4.1810540000 | -0.4706860000 |
| C | 7.7843570000  | -2.8123830000 | -4.0088850000 |
| H | 8.2764330000  | -3.1052250000 | -4.9404810000 |
| H | 8.5402690000  | -2.8228690000 | -3.2167060000 |
| C | 6.6242660000  | -3.7393850000 | -3.6735340000 |
| H | 7.4424140000  | -1.7789130000 | -4.1245980000 |
| H | 5.8979920000  | -3.7362670000 | -4.4956230000 |
| C | 5.9094960000  | -3.3566600000 | -2.3805390000 |
| H | 6.9863270000  | -4.7722020000 | -3.5914580000 |
| H | 5.5414340000  | -2.3267910000 | -2.4680710000 |
| H | 6.6420830000  | -3.3466460000 | -1.5617620000 |
| C | 4.7502780000  | -4.2894340000 | -2.0347640000 |
| H | 4.0113800000  | -4.3000000000 | -2.8433820000 |
| H | 5.1030010000  | -5.3212020000 | -1.9199370000 |

(Me<sub>3</sub>Si)<sub>3</sub>As<sub>7</sub>

Charge = 0 Multiplicity = 1

|    |              |              |               |
|----|--------------|--------------|---------------|
| As | 0.8939160000 | 0.1150580000 | -0.9128230000 |
| As | 2.8027210000 | 1.0463970000 | 0.2499980000  |
| As | 2.1198270000 | 0.8964180000 | 2.5834390000  |
| Si | 2.5932900000 | 3.4144540000 | -0.1436870000 |

|    |               |               |               |
|----|---------------|---------------|---------------|
| C  | 1.9867110000  | 3.6582520000  | -1.9063660000 |
| H  | 2.6007720000  | 3.1076200000  | -2.6244740000 |
| H  | 2.0338300000  | 4.7211550000  | -2.1684940000 |
| H  | 0.9504130000  | 3.3287180000  | -2.0203630000 |
| C  | 4.3552080000  | 4.0547140000  | 0.0241830000  |
| H  | 4.7461470000  | 3.8877200000  | 1.0322930000  |
| H  | 4.3864180000  | 5.1322730000  | -0.1720580000 |
| H  | 5.0285000000  | 3.5617190000  | -0.6825600000 |
| C  | 1.4854420000  | 4.3190600000  | 1.0715670000  |
| H  | 0.4502090000  | 3.9779510000  | 0.9984940000  |
| H  | 1.5098380000  | 5.3925000000  | 0.8503330000  |
| H  | 1.8203500000  | 4.1810670000  | 2.1034440000  |
| As | -0.8459430000 | 1.3069530000  | 0.2778760000  |
| As | -0.3316200000 | 0.7986920000  | 2.6042140000  |
| Si | -2.7972350000 | -0.0608740000 | -0.0779840000 |
| C  | -2.7342670000 | -0.7164870000 | -1.8386150000 |
| H  | -2.5760070000 | 0.0866440000  | -2.5637480000 |
| H  | -3.6822860000 | -1.2087380000 | -2.0829980000 |
| H  | -1.9325810000 | -1.4498330000 | -1.9610710000 |
| C  | -4.2309000000 | 1.1441360000  | 0.1087020000  |
| H  | -4.2656280000 | 1.5704030000  | 1.1156910000  |
| H  | -5.1822210000 | 0.6305280000  | -0.0697190000 |
| H  | -4.1531770000 | 1.9708980000  | -0.6028740000 |
| C  | -3.0049030000 | -1.4678180000 | 1.1469270000  |
| H  | -2.1939770000 | -2.1949640000 | 1.0612090000  |
| H  | -3.9509110000 | -1.9836570000 | 0.9450490000  |
| H  | -3.0335040000 | -1.1050800000 | 2.1781800000  |
| As | 0.7523070000  | -1.9829120000 | 0.2888050000  |
| As | 0.9787860000  | -1.2755910000 | 2.6086610000  |
| Si | 2.9036100000  | -2.9931520000 | -0.1005700000 |
| C  | 3.3986240000  | -2.6311390000 | -1.8775490000 |
| H  | 2.6080300000  | -2.9056660000 | -2.5814400000 |
| H  | 4.2941820000  | -3.2074080000 | -2.1355820000 |
| H  | 3.6277180000  | -1.5713330000 | -2.0182790000 |
| C  | 2.5806840000  | -4.8346850000 | 0.1154720000  |
| H  | 2.2520340000  | -5.0652450000 | 1.1332050000  |

|   |              |               |               |
|---|--------------|---------------|---------------|
| H | 3.4967620000 | -5.4042360000 | -0.0770330000 |
| H | 1.8097470000 | -5.1892220000 | -0.5743790000 |
| C | 4.2547930000 | -2.4563570000 | 1.0869400000  |
| H | 4.4809200000 | -1.3926310000 | 0.9810730000  |
| H | 5.1677260000 | -3.0241620000 | 0.8724970000  |
| H | 3.9778540000 | -2.6464910000 | 2.1276700000  |

(Me<sub>3</sub>Si-CO<sub>2</sub>)<sub>3</sub>As<sub>7</sub>

Charge = 0 Multiplicity = 1

|    |               |               |               |
|----|---------------|---------------|---------------|
| As | -0.2331750000 | 0.5083160000  | -1.4662100000 |
| As | 0.4961370000  | 2.1904470000  | 0.1263520000  |
| As | 0.5541960000  | 0.9890130000  | 2.2703730000  |
| C  | -1.2644820000 | 3.0840480000  | 0.4543980000  |
| As | -2.0189440000 | -0.3915250000 | -0.0946580000 |
| As | -0.9168110000 | -0.9468570000 | 2.0327940000  |
| C  | -2.0383880000 | -2.2225470000 | -0.9022370000 |
| As | 1.4209710000  | -1.1776290000 | -0.9120680000 |
| As | 1.4720400000  | -1.1596520000 | 1.5471160000  |
| C  | 3.0305040000  | -0.0250020000 | -1.2067740000 |
| O  | -1.6085660000 | 3.4644760000  | 1.5416750000  |
| O  | -2.4641280000 | -3.1311410000 | -0.0346360000 |
| O  | 3.0585440000  | 0.9058190000  | -1.9676590000 |
| O  | -1.9365770000 | 3.2830750000  | -0.6721950000 |
| O  | 4.0692720000  | -0.4745040000 | -0.5137660000 |
| O  | -1.7637920000 | -2.4409480000 | -2.0524720000 |
| Si | -2.6406790000 | -4.8131340000 | -0.4406910000 |
| C  | -3.9173470000 | -4.9657990000 | -1.7908750000 |
| H  | -4.8744430000 | -4.5368040000 | -1.4802690000 |
| H  | -4.0870260000 | -6.0188710000 | -2.0378370000 |
| H  | -3.5853370000 | -4.4500740000 | -2.6949720000 |
| C  | -3.2281320000 | -5.5384860000 | 1.1716150000  |
| H  | -2.4941340000 | -5.3753400000 | 1.9656290000  |
| H  | -3.3869750000 | -6.6172180000 | 1.0755370000  |
| H  | -4.1724990000 | -5.0859140000 | 1.4864700000  |
| C  | -0.9727410000 | -5.4744550000 | -0.9460130000 |
| H  | -0.6188960000 | -4.9796450000 | -1.8533580000 |

|    |               |               |               |
|----|---------------|---------------|---------------|
| H  | -1.0313820000 | -6.5504330000 | -1.1398980000 |
| H  | -0.2310530000 | -5.3164310000 | -0.1574640000 |
| Si | 5.6448520000  | 0.2575760000  | -0.5848240000 |
| C  | 6.6173350000  | -0.8057810000 | 0.5962960000  |
| H  | 6.1899450000  | -0.7681410000 | 1.6021420000  |
| H  | 7.6556660000  | -0.4649250000 | 0.6585260000  |
| H  | 6.6249770000  | -1.8498320000 | 0.2711320000  |
| C  | 5.5039540000  | 2.0202240000  | 0.0043630000  |
| H  | 4.8583110000  | 2.5993610000  | -0.6599120000 |
| H  | 6.4904550000  | 2.4947240000  | 0.0259020000  |
| H  | 5.0883020000  | 2.0672220000  | 1.0151580000  |
| C  | 6.2782390000  | 0.1314690000  | -2.3337430000 |
| H  | 6.3105510000  | -0.9093580000 | -2.6686030000 |
| H  | 7.2929310000  | 0.5370960000  | -2.4019780000 |
| H  | 5.6368980000  | 0.6933680000  | -3.0167150000 |
| Si | -3.4402460000 | 4.1550290000  | -0.7349890000 |
| C  | -3.1302830000 | 5.9002840000  | -0.1561270000 |
| H  | -2.8091400000 | 5.9088800000  | 0.8880990000  |
| H  | -4.0447710000 | 6.4966610000  | -0.2391500000 |
| H  | -2.3578780000 | 6.3864650000  | -0.7590340000 |
| C  | -4.6967830000 | 3.2646250000  | 0.3147380000  |
| H  | -4.8156950000 | 2.2262370000  | -0.0078540000 |
| H  | -5.6724620000 | 3.7556580000  | 0.2371010000  |
| H  | -4.3934370000 | 3.2651030000  | 1.3642150000  |
| C  | -3.8540660000 | 4.0757740000  | -2.5497660000 |
| H  | -3.0701700000 | 4.5420510000  | -3.1529240000 |
| H  | -4.7939380000 | 4.5976880000  | -2.7557100000 |
| H  | -3.9642610000 | 3.0397750000  | -2.8820600000 |

(Et<sub>3</sub>Ge)<sub>3</sub>As<sub>7</sub>

Charge = 0 Multiplicity = 1

|    |               |               |               |
|----|---------------|---------------|---------------|
| Ge | -2.1776230000 | 2.9861750000  | 0.3897510000  |
| Ge | -1.6860310000 | -3.4361760000 | 0.7121590000  |
| As | 1.8142140000  | -1.1616190000 | 0.1029010000  |
| As | -1.8511480000 | -1.0208560000 | 0.1642570000  |
| As | 0.0843720000  | 2.0629250000  | -0.0026150000 |



|    |               |               |               |
|----|---------------|---------------|---------------|
| As | 0.0414140000  | 0.0039730000  | 1.2710450000  |
| As | 1.2625630000  | -0.7501260000 | -2.2328540000 |
| As | -1.1811080000 | -0.9553700000 | -2.1779410000 |
| As | -0.1352110000 | 1.2620540000  | -2.2937910000 |
| C  | -3.5216370000 | 2.3626130000  | -0.9140710000 |
| H  | -3.0258370000 | 2.2847130000  | -1.8870010000 |
| H  | -3.8000060000 | 1.3432880000  | -0.6294320000 |
| C  | -1.9248820000 | 4.9374830000  | 0.2060810000  |
| H  | -1.6005780000 | 5.1380760000  | -0.8208350000 |
| H  | -2.9125530000 | 5.4017120000  | 0.3116670000  |
| C  | -0.4155960000 | -3.8055130000 | 2.1730180000  |
| H  | -0.3775520000 | -4.8991500000 | 2.2579450000  |
| H  | 0.5789260000  | -3.4849570000 | 1.8482160000  |
| C  | -2.6630980000 | 2.5635720000  | 2.2570220000  |
| H  | -2.8463760000 | 1.4859440000  | 2.3148190000  |
| H  | -1.7826510000 | 2.7610780000  | 2.8775420000  |
| C  | -3.5192780000 | -3.8581120000 | 1.3135570000  |
| H  | -3.4996620000 | -4.8926570000 | 1.6786780000  |
| H  | -3.7499130000 | -3.2274820000 | 2.1783250000  |
| H  | -1.7403330000 | -5.5359840000 | -0.6361440000 |
| H  | -1.8314550000 | -4.1598970000 | -1.7187920000 |
| C  | 3.6339330000  | 1.0500670000  | 2.2510310000  |
| H  | 3.3761780000  | 0.2094380000  | 2.9036710000  |
| H  | 5.4070230000  | -1.5388340000 | 2.3005130000  |
| C  | -4.7525060000 | 3.2603910000  | -1.0226830000 |
| H  | -5.4562230000 | 2.8707090000  | -1.7657490000 |
| H  | -5.2930340000 | 3.3358270000  | -0.0747680000 |
| H  | -4.4876490000 | 4.2765210000  | -1.3294010000 |
| C  | -0.7792540000 | -3.1802910000 | 3.5153790000  |
| H  | -0.0493280000 | -3.4468300000 | 4.2867730000  |
| H  | -0.8031430000 | -2.0876120000 | 3.4575160000  |
| H  | -1.7604630000 | -3.5133070000 | 3.8671110000  |
| C  | -0.9437610000 | 5.5360630000  | 1.2084010000  |
| H  | -0.8359210000 | 6.6166400000  | 1.0685770000  |
| H  | -1.2715990000 | 5.3725680000  | 2.2400060000  |
| H  | 0.0515040000  | 5.0918590000  | 1.1087680000  |

|    |               |               |               |
|----|---------------|---------------|---------------|
| C  | -4.5814660000 | -3.6908850000 | 0.2320010000  |
| H  | -5.5799710000 | -3.9384880000 | 0.6067550000  |
| H  | -4.6184530000 | -2.6595680000 | -0.1340480000 |
| H  | -4.3875750000 | -4.3374360000 | -0.6294970000 |
| C  | -3.8674290000 | 3.3442980000  | 2.7789620000  |
| H  | -4.0618250000 | 3.1130360000  | 3.8316470000  |
| H  | -3.7145590000 | 4.4257340000  | 2.7075260000  |
| H  | -4.7785570000 | 3.1051340000  | 2.2232160000  |
| C  | 4.9117840000  | 1.7302270000  | 2.7373030000  |
| H  | 4.8155200000  | 2.0542850000  | 3.7789860000  |
| H  | 5.7754790000  | 1.0597680000  | 2.6849070000  |
| H  | 5.1500470000  | 2.6182170000  | 2.1445990000  |
| C  | 0.1925690000  | -4.7286710000 | -1.1874270000 |
| H  | 0.3341870000  | -5.3903420000 | -2.0482280000 |
| H  | 0.6626450000  | -3.7716150000 | -1.4288730000 |
| H  | 0.7469090000  | -5.1582500000 | -0.3479030000 |
| H  | 3.1404770000  | 2.5741960000  | -0.6420410000 |
| C  | 5.2560690000  | 2.3833180000  | -1.1134730000 |
| H  | 5.2551800000  | 3.1860610000  | -1.8583100000 |
| H  | 5.6457280000  | 2.8063460000  | -0.1828760000 |
| H  | 5.9708790000  | 1.6280410000  | -1.4531450000 |
| C  | -1.2862780000 | -4.5619030000 | -0.8590120000 |
| Ge | 3.7430650000  | 0.3581890000  | 0.4044830000  |
| C  | 3.8549870000  | 1.8005290000  | -0.9391470000 |
| H  | 3.4919360000  | 1.3988530000  | -1.8905380000 |
| C  | 5.3075670000  | -0.8370620000 | 0.2389960000  |
| H  | 5.3004930000  | -1.2584540000 | -0.7721320000 |
| H  | 6.2030560000  | -0.2077050000 | 0.3014720000  |
| C  | 5.3587310000  | -1.9452040000 | 1.2852540000  |
| H  | 6.2362990000  | -2.5855230000 | 1.1489190000  |
| H  | 4.4734300000  | -2.5865020000 | 1.2333000000  |
| H  | 2.7872350000  | 1.7426060000  | 2.2934900000  |

(Et<sub>3</sub>Ge-CO<sub>2</sub>)<sub>3</sub>As<sub>7</sub>

Charge = 0 Multiplicity = 1

|    |               |              |              |
|----|---------------|--------------|--------------|
| As | -0.3676570000 | 0.0182020000 | 0.9365430000 |
|----|---------------|--------------|--------------|

|    |               |               |               |
|----|---------------|---------------|---------------|
| As | -1.8848890000 | 0.6812660000  | -0.8355140000 |
| As | 1.6223720000  | 0.9975590000  | -0.0419920000 |
| As | 0.0032380000  | -2.2570780000 | 0.1787920000  |
| As | 1.7004110000  | 0.0265500000  | -2.2989540000 |
| As | 0.3406960000  | -2.0059220000 | -2.2436890000 |
| As | -0.6674670000 | 0.1238250000  | -2.8957520000 |
| Ge | -1.0888990000 | 5.0035640000  | 0.5195570000  |
| Ge | 5.4502780000  | -1.4137200000 | 0.7811360000  |
| Ge | -4.5151920000 | -2.7738540000 | 0.9867420000  |
| O  | 4.0353350000  | -0.3496890000 | 0.1153110000  |
| O  | -1.4490310000 | 3.2795280000  | -1.8896750000 |
| O  | -2.2453170000 | -3.6705480000 | -0.7906200000 |
| O  | -1.3756140000 | 3.1434580000  | 0.3471850000  |
| O  | -2.6731620000 | -2.3420620000 | 0.9644400000  |
| O  | 2.7609610000  | -0.7182460000 | 1.9227720000  |
| C  | -1.4907110000 | 2.6480850000  | -0.8626070000 |
| C  | 2.9472180000  | -0.2268510000 | 0.8354240000  |
| C  | -1.9059320000 | -2.8608540000 | 0.0377760000  |
| C  | 6.6903390000  | -1.2066680000 | -0.7142200000 |
| H  | 6.2089690000  | -1.6272150000 | -1.6027610000 |
| C  | 8.0466720000  | -1.8644760000 | -0.4673570000 |
| H  | 6.8048250000  | -0.1347480000 | -0.9027180000 |
| C  | 0.5794110000  | 5.4125790000  | -0.4155030000 |
| H  | 1.2223850000  | 4.5339960000  | -0.2966500000 |
| C  | 1.2849280000  | 6.6677530000  | 0.0959680000  |
| H  | 0.3504660000  | 5.4866900000  | -1.4816560000 |
| C  | -0.9299010000 | 5.1122960000  | 2.4643430000  |
| C  | -2.1618730000 | 4.6040090000  | 3.2087830000  |
| H  | -0.7194610000 | 6.1557090000  | 2.7263410000  |
| H  | -0.0417070000 | 4.5380160000  | 2.7480010000  |
| C  | -2.7029750000 | 5.8601430000  | -0.1764090000 |
| H  | -2.7637430000 | 5.6072210000  | -1.2378950000 |
| C  | -2.7293250000 | 7.3731830000  | 0.0348320000  |
| H  | -3.5610460000 | 5.3865530000  | 0.3117000000  |
| C  | 4.7963360000  | -3.2473020000 | 0.9867050000  |
| C  | 4.3577350000  | -3.6321060000 | 2.3965260000  |

|   |               |               |               |
|---|---------------|---------------|---------------|
| H | 5.6018880000  | -3.9034180000 | 0.6353450000  |
| H | 3.9727760000  | -3.3695910000 | 0.2751960000  |
| C | 6.0690100000  | -0.5610240000 | 2.4269070000  |
| C | 6.4664430000  | 0.9020570000  | 2.2537900000  |
| H | 6.9152340000  | -1.1530640000 | 2.7959880000  |
| H | 5.2662870000  | -0.6660350000 | 3.1613400000  |
| C | -4.6810110000 | -4.6725700000 | 1.4400450000  |
| C | -4.7724440000 | -5.6250890000 | 0.2512250000  |
| H | -5.5667450000 | -4.7609830000 | 2.0809610000  |
| H | -3.8229280000 | -4.9207660000 | 2.0734400000  |
| C | -5.0568960000 | -1.6005940000 | 2.4513180000  |
| C | -4.3590800000 | -1.9081740000 | 3.7740640000  |
| H | -6.1450190000 | -1.6817540000 | 2.5577260000  |
| H | -4.8508090000 | -0.5730870000 | 2.1337580000  |
| C | -5.2384570000 | -2.2474310000 | -0.7491900000 |
| H | -4.8364840000 | -1.2540370000 | -0.9740130000 |
| C | -6.7661330000 | -2.2370200000 | -0.7861940000 |
| H | -4.8266810000 | -2.9307780000 | -1.4960170000 |
| H | 8.5550810000  | -1.4346610000 | 0.4016170000  |
| H | 8.7125650000  | -1.7379020000 | -1.3262440000 |
| H | 7.9520680000  | -2.9406610000 | -0.2901480000 |
| H | 6.8002210000  | 1.3354620000  | 3.2015550000  |
| H | 5.6267130000  | 1.5046610000  | 1.8965460000  |
| H | 7.2830650000  | 1.0210000000  | 1.5350130000  |
| H | 5.1807260000  | -3.5443950000 | 3.1124760000  |
| H | 4.0075870000  | -4.6684730000 | 2.4268440000  |
| H | 3.5448830000  | -2.9900800000 | 2.7411390000  |
| H | 0.6716930000  | 7.5655340000  | -0.0291550000 |
| H | 2.2198460000  | 6.8393150000  | -0.4463440000 |
| H | 1.5368570000  | 6.5889270000  | 1.1578240000  |
| H | -3.0531310000 | 5.1894440000  | 2.9621170000  |
| H | -2.0236730000 | 4.6623720000  | 4.2928210000  |
| H | -2.3717250000 | 3.5612310000  | 2.9568060000  |
| H | -3.6559520000 | 7.8087920000  | -0.3513280000 |
| H | -1.9020590000 | 7.8690400000  | -0.4821180000 |
| H | -2.6632850000 | 7.6413160000  | 1.0942280000  |

|   |               |               |               |
|---|---------------|---------------|---------------|
| H | -7.1324150000 | -1.9386390000 | -1.7731590000 |
| H | -7.1880080000 | -1.5359070000 | -0.0594210000 |
| H | -7.1876850000 | -3.2245730000 | -0.5724740000 |
| H | -4.6807480000 | -1.2206850000 | 4.5624920000  |
| H | -3.2741120000 | -1.8169200000 | 3.6774740000  |
| H | -4.5760360000 | -2.9238360000 | 4.1192720000  |
| H | -4.8538590000 | -6.6635720000 | 0.5873210000  |
| H | -3.8913430000 | -5.5414980000 | -0.3879080000 |
| H | -5.6502300000 | -5.4141540000 | -0.3671970000 |

(<sup>115</sup>Bu<sub>3</sub>Sn)<sub>3</sub>As<sub>7</sub>

Charge = 0 Multiplicity = 1

|    |               |               |               |
|----|---------------|---------------|---------------|
| Sn | -3.5786010000 | -0.8460740000 | 0.1936460000  |
| Sn | 2.7682600000  | -2.5975040000 | 0.0751250000  |
| As | 1.8498520000  | 1.2988990000  | -0.3874680000 |
| As | 0.1977400000  | -1.9880600000 | -0.2693400000 |
| As | -1.7952050000 | 1.0738680000  | -0.2847260000 |
| As | 0.1248260000  | 0.1493820000  | 0.8640510000  |
| As | 1.1262180000  | 0.9694970000  | -2.6865220000 |
| As | 0.2610260000  | -1.3270570000 | -2.6101760000 |
| As | -1.2972170000 | 0.5711920000  | -2.6131960000 |
| Sn | 1.0262020000  | 3.8073570000  | -0.0250410000 |
| C  | 5.3515500000  | -7.4636300000 | 1.4317720000  |
| H  | 5.3086880000  | -8.5541730000 | 1.5012240000  |
| H  | 5.5541920000  | -7.0749800000 | 2.4351570000  |
| C  | 4.0593420000  | -6.8864870000 | 0.8704680000  |
| H  | 6.2076460000  | -7.2051520000 | 0.7998860000  |
| H  | 3.8618250000  | -7.3121250000 | -0.1213130000 |
| C  | 4.0803460000  | -5.3637290000 | 0.7616660000  |
| H  | 3.2137850000  | -7.1862090000 | 1.5023110000  |
| H  | 4.9291990000  | -5.0682870000 | 0.1306050000  |
| H  | 4.2881150000  | -4.9428860000 | 1.7549160000  |
| C  | 2.7830190000  | -4.7800940000 | 0.2055790000  |
| H  | 2.5821730000  | -5.1760350000 | -0.7962910000 |
| H  | 1.9331340000  | -5.0752500000 | 0.8312010000  |
| C  | 2.2334810000  | -2.1562240000 | 5.6994670000  |

|   |               |               |               |
|---|---------------|---------------|---------------|
| H | 2.6034950000  | -1.7416770000 | 6.6414400000  |
| H | 2.2437640000  | -3.2473770000 | 5.7909100000  |
| C | 3.0733770000  | -1.6953930000 | 4.5163290000  |
| H | 1.1898130000  | -1.8450000000 | 5.5871230000  |
| H | 3.0727900000  | -0.5994210000 | 4.4657990000  |
| C | 2.5834180000  | -2.2512410000 | 3.1818320000  |
| H | 4.1193880000  | -1.9920010000 | 4.6655940000  |
| H | 1.5359180000  | -1.9527280000 | 3.0407300000  |
| H | 2.5775570000  | -3.3484950000 | 3.2359610000  |
| C | 3.4196270000  | -1.7875790000 | 1.9926730000  |
| H | 3.4113910000  | -0.6955410000 | 1.9125660000  |
| H | 4.4677840000  | -2.0846910000 | 2.1217710000  |
| C | 7.8846060000  | -1.7509290000 | -2.1973060000 |
| H | 8.4811400000  | -1.3988780000 | -3.0435640000 |
| H | 8.1492270000  | -2.7983110000 | -2.0181870000 |
| C | 6.3932720000  | -1.5977240000 | -2.4620300000 |
| H | 8.1905950000  | -1.1787720000 | -1.3152840000 |
| H | 6.1580980000  | -0.5463880000 | -2.6686850000 |
| C | 5.5257240000  | -2.0791220000 | -1.3014400000 |
| H | 6.1177940000  | -2.1532140000 | -3.3671960000 |
| H | 5.8049240000  | -1.5216470000 | -0.3973930000 |
| H | 5.7692070000  | -3.1296680000 | -1.0931760000 |
| C | 4.0302150000  | -1.9232600000 | -1.5702640000 |
| H | 3.7841370000  | -0.8746790000 | -1.7641270000 |
| H | 3.7359720000  | -2.4881820000 | -2.4618370000 |
| C | -6.3032440000 | -4.9019410000 | -2.6665970000 |
| H | -6.2720880000 | -5.6912740000 | -3.4228320000 |
| H | -7.0678040000 | -4.1801040000 | -2.9723450000 |
| C | -4.9469810000 | -4.2299790000 | -2.5031800000 |
| H | -6.6358940000 | -5.3557430000 | -1.7271920000 |
| H | -4.1930210000 | -4.9773240000 | -2.2264280000 |
| C | -4.9513790000 | -3.1181800000 | -1.4564920000 |
| H | -4.6210060000 | -3.8124330000 | -3.4639060000 |
| H | -5.2803570000 | -3.5396910000 | -0.4970720000 |
| H | -5.7123240000 | -2.3767730000 | -1.7342710000 |
| C | -3.5920470000 | -2.4415390000 | -1.2971850000 |

|   |               |               |               |
|---|---------------|---------------|---------------|
| H | -2.8259740000 | -3.1659070000 | -1.0016460000 |
| H | -3.2623020000 | -2.0121940000 | -2.2492970000 |
| C | -4.2977160000 | -4.9042320000 | 4.0635250000  |
| H | -4.0966230000 | -5.2845640000 | 5.0689290000  |
| H | -3.9377690000 | -5.6510310000 | 3.3482370000  |
| C | -3.6313530000 | -3.5552750000 | 3.8316050000  |
| H | -5.3841640000 | -4.8334310000 | 3.9468000000  |
| H | -3.9838200000 | -2.8338330000 | 4.5794540000  |
| C | -3.8912170000 | -2.9922180000 | 2.4361480000  |
| H | -2.5483910000 | -3.6447050000 | 3.9831330000  |
| H | -4.9763170000 | -2.9134540000 | 2.2853210000  |
| H | -3.5371440000 | -3.7182210000 | 1.6924030000  |
| C | -3.2246380000 | -1.6392060000 | 2.1981800000  |
| H | -3.5849190000 | -0.8960550000 | 2.9184540000  |
| H | -2.1417770000 | -1.7183350000 | 2.3398080000  |
| C | -9.0395720000 | -0.3359890000 | 1.6934460000  |
| H | -9.9624050000 | 0.2498540000  | 1.6594790000  |
| H | -8.7647280000 | -0.4608080000 | 2.7460200000  |
| C | -7.9206160000 | 0.3352470000  | 0.9091110000  |
| H | -9.2630660000 | -1.3297530000 | 1.2916410000  |
| H | -8.2298860000 | 0.4725780000  | -0.1346370000 |
| C | -6.6116760000 | -0.4504540000 | 0.9395590000  |
| H | -7.7408530000 | 1.3421220000  | 1.3064400000  |
| H | -6.7988880000 | -1.4596560000 | 0.5495620000  |
| H | -6.3081680000 | -0.5863960000 | 1.9864630000  |
| C | -5.4883330000 | 0.2201760000  | 0.1512430000  |
| H | -5.7776370000 | 0.3432350000  | -0.8988280000 |
| H | -5.3009760000 | 1.2272520000  | 0.5406110000  |
| C | -3.9261540000 | 6.1243470000  | -1.5554630000 |
| H | -4.5958070000 | 6.4382980000  | -2.3611360000 |
| H | -3.7464190000 | 6.9949810000  | -0.9160130000 |
| C | -2.6206180000 | 5.5613500000  | -2.0999600000 |
| H | -4.4566330000 | 5.3783870000  | -0.9546810000 |
| H | -2.8312310000 | 4.7137010000  | -2.7641560000 |
| C | -1.6641830000 | 5.1009590000  | -1.0030690000 |
| H | -2.1207540000 | 6.3158870000  | -2.7204280000 |

|   |               |              |               |
|---|---------------|--------------|---------------|
| H | -2.1688080000 | 4.3430790000 | -0.3898880000 |
| H | -1.4604440000 | 5.9472700000 | -0.3332360000 |
| C | -0.3574230000 | 4.5356740000 | -1.5517170000 |
| H | -0.5591670000 | 3.7082230000 | -2.2393010000 |
| H | 0.1840590000  | 5.2970020000 | -2.1251300000 |
| C | 6.2629720000  | 4.9274990000 | 1.8497660000  |
| H | 7.1667040000  | 5.5397490000 | 1.7827540000  |
| H | 6.5547260000  | 3.8853940000 | 1.6833060000  |
| C | 5.2097580000  | 5.3697320000 | 0.8432610000  |
| H | 5.8860820000  | 5.0034570000 | 2.8750790000  |
| H | 4.9571690000  | 6.4245570000 | 1.0101140000  |
| C | 3.9326230000  | 4.5359560000 | 0.9065990000  |
| H | 5.6212850000  | 5.3142220000 | -0.1723970000 |
| H | 3.5271850000  | 4.5884900000 | 1.9265360000  |
| H | 4.1890500000  | 3.4804870000 | 0.7439830000  |
| C | 2.8730340000  | 4.9718650000 | -0.1006770000 |
| H | 2.5944360000  | 6.0203770000 | 0.0626660000  |
| H | 3.2653270000  | 4.9107340000 | -1.1220970000 |
| C | -0.3289660000 | 6.8921590000 | 4.5201690000  |
| H | -0.7216340000 | 6.9295040000 | 5.5401450000  |
| H | -0.9431180000 | 7.5571580000 | 3.9040790000  |
| C | -0.3337700000 | 5.4727370000 | 3.9699740000  |
| H | 0.6850160000  | 7.3051480000 | 4.5397750000  |
| H | 0.2585300000  | 4.8192820000 | 4.6227010000  |
| C | 0.2135660000  | 5.3797220000 | 2.5473140000  |
| H | -1.3547730000 | 5.0717610000 | 3.9856370000  |
| H | 1.2338450000  | 5.7861260000 | 2.5344170000  |
| H | -0.3789020000 | 6.0404990000 | 1.9004700000  |
| C | 0.2083240000  | 3.9564790000 | 1.9939600000  |
| H | 0.7971660000  | 3.2933510000 | 2.6371840000  |
| H | -0.8085870000 | 3.5506740000 | 1.9725900000  |

(<sup>t</sup>Bu<sub>3</sub>Sn-CO<sub>2</sub>)<sub>3</sub>As<sub>7</sub>

Charge = 0 Multiplicity = 1

|    |               |               |               |
|----|---------------|---------------|---------------|
| As | -0.2577170000 | -0.0394600000 | 0.7078430000  |
| As | -1.9634510000 | 0.5085280000  | -0.9278520000 |



|    |               |               |               |
|----|---------------|---------------|---------------|
| As | 1.5266570000  | 1.2446200000  | -0.3169240000 |
| As | 0.3565740000  | -2.1942220000 | -0.2254770000 |
| As | 1.5730360000  | 0.4359750000  | -2.6370130000 |
| As | 0.5011550000  | -1.7624350000 | -2.6411100000 |
| As | -0.8209810000 | 0.2440540000  | -3.0869780000 |
| O  | 4.0406790000  | 0.0439410000  | -0.4285420000 |
| O  | -1.8726340000 | 3.1944460000  | -1.8408890000 |
| O  | -1.8193420000 | -3.7472300000 | -1.1703290000 |
| O  | -1.7063230000 | 2.9621960000  | 0.3688690000  |
| O  | -2.2006860000 | -2.7172220000 | 0.7660740000  |
| O  | 3.0110220000  | -0.3472450000 | 1.5057200000  |
| C  | -1.8095560000 | 2.5051340000  | -0.8431060000 |
| C  | 3.0371500000  | 0.1355040000  | 0.3905570000  |
| C  | -1.4741330000 | -3.0068040000 | -0.2711360000 |
| Sn | 5.5725110000  | -1.1615900000 | 0.3999040000  |
| C  | 9.6796260000  | -0.1469230000 | 4.1467300000  |
| H  | 10.0092860000 | 0.3832980000  | 5.0444180000  |
| H  | 10.3560620000 | 0.1297610000  | 3.3313490000  |
| C  | 8.2351290000  | 0.1857560000  | 3.8006180000  |
| H  | 9.8058870000  | -1.2189910000 | 4.3300540000  |
| H  | 7.5821590000  | -0.0706160000 | 4.6439700000  |
| C  | 7.7362160000  | -0.5351980000 | 2.5509580000  |
| H  | 8.1282480000  | 1.2676760000  | 3.6529720000  |
| H  | 7.8520160000  | -1.6173310000 | 2.7009890000  |
| H  | 8.3942410000  | -0.2778130000 | 1.7098040000  |
| C  | 6.2856830000  | -0.2024450000 | 2.2069770000  |
| H  | 5.6069170000  | -0.4842230000 | 3.0168700000  |
| H  | 6.1633490000  | 0.8762900000  | 2.0582250000  |
| C  | 5.8149520000  | -6.3776980000 | 2.5444910000  |
| H  | 5.3573260000  | -7.3659890000 | 2.6422070000  |
| H  | 5.9195650000  | -5.9601020000 | 3.5512610000  |
| C  | 4.9851770000  | -5.4638140000 | 1.6537900000  |
| H  | 6.8225660000  | -6.5178020000 | 2.1392500000  |
| H  | 4.8701820000  | -5.9166470000 | 0.6611680000  |
| C  | 5.5899340000  | -4.0712010000 | 1.4962450000  |
| H  | 3.9716850000  | -5.3657820000 | 2.0613440000  |

|    |               |               |               |
|----|---------------|---------------|---------------|
| H  | 6.6069130000  | -4.1734250000 | 1.0929650000  |
| H  | 5.7046190000  | -3.6228200000 | 2.4921490000  |
| C  | 4.7512140000  | -3.1556550000 | 0.6050500000  |
| H  | 4.6453420000  | -3.5835400000 | -0.3977170000 |
| H  | 3.7434650000  | -3.0350230000 | 1.0134190000  |
| C  | 9.9430980000  | -3.0760900000 | -2.6641640000 |
| H  | 10.6007250000 | -2.9407850000 | -3.5272280000 |
| H  | 9.4492340000  | -4.0472120000 | -2.7732670000 |
| C  | 8.9245190000  | -1.9500900000 | -2.5553960000 |
| H  | 10.5744590000 | -3.1260830000 | -1.7708980000 |
| H  | 9.4433210000  | -0.9861810000 | -2.4807640000 |
| C  | 7.9871100000  | -2.1017990000 | -1.3603440000 |
| H  | 8.3251050000  | -1.9009730000 | -3.4729030000 |
| H  | 8.5924490000  | -2.1572910000 | -0.4450870000 |
| H  | 7.4733300000  | -3.0695610000 | -1.4372750000 |
| C  | 6.9644130000  | -0.9713020000 | -1.2541780000 |
| H  | 7.4704160000  | -0.0040940000 | -1.1600910000 |
| H  | 6.3566930000  | -0.9171470000 | -2.1641870000 |
| Sn | -4.1038560000 | -3.6340050000 | 0.6247750000  |
| C  | -7.9383430000 | -3.5690820000 | 4.8054690000  |
| H  | -8.2938620000 | -3.1069170000 | 5.7305360000  |
| H  | -7.7355970000 | -4.6237760000 | 5.0188560000  |
| C  | -6.6977360000 | -2.8676950000 | 4.2704880000  |
| H  | -8.7577330000 | -3.5316020000 | 4.0800870000  |
| H  | -6.9170030000 | -1.8070440000 | 4.0954290000  |
| C  | -6.1701400000 | -3.4839940000 | 2.9775140000  |
| H  | -5.9022920000 | -2.8916000000 | 5.0257120000  |
| H  | -6.9718100000 | -3.4628920000 | 2.2265520000  |
| H  | -5.9567410000 | -4.5465300000 | 3.1570160000  |
| C  | -4.9238270000 | -2.7796800000 | 2.4430370000  |
| H  | -5.1343010000 | -1.7227180000 | 2.2461920000  |
| H  | -4.1205790000 | -2.8023730000 | 3.1878070000  |
| C  | -8.6972480000 | -2.1321140000 | -2.3249500000 |
| H  | -9.1107410000 | -1.7083460000 | -3.2442630000 |
| H  | -9.0308190000 | -1.5048250000 | -1.4917080000 |
| C  | -7.1781260000 | -2.2112500000 | -2.3800560000 |

|    |               |               |               |
|----|---------------|---------------|---------------|
| H  | -9.1406210000 | -3.1240880000 | -2.1886050000 |
| H  | -6.8683230000 | -2.8170310000 | -3.2405340000 |
| C  | -6.5623230000 | -2.7990680000 | -1.1128120000 |
| H  | -6.7587580000 | -1.2115670000 | -2.5471320000 |
| H  | -6.9893700000 | -3.7976080000 | -0.9462240000 |
| H  | -6.8778170000 | -2.1911980000 | -0.2539730000 |
| C  | -5.0379090000 | -2.8748120000 | -1.1742890000 |
| H  | -4.7023710000 | -3.5013830000 | -2.0057630000 |
| H  | -4.6101230000 | -1.8795490000 | -1.3403690000 |
| C  | -6.0392550000 | -8.9017000000 | 0.0097150000  |
| H  | -5.8431680000 | -9.9766190000 | 0.0519530000  |
| H  | -6.3603720000 | -8.6631770000 | -1.0094530000 |
| C  | -4.8101390000 | -8.0935360000 | 0.4012040000  |
| H  | -6.8807090000 | -8.6916600000 | 0.6781860000  |
| H  | -4.4893540000 | -8.3710030000 | 1.4131260000  |
| C  | -5.0440120000 | -6.5858500000 | 0.3513270000  |
| H  | -3.9731630000 | -8.3443560000 | -0.2619200000 |
| H  | -5.8868050000 | -6.3393400000 | 1.0115250000  |
| H  | -5.3671930000 | -6.3138320000 | -0.6624720000 |
| C  | -3.8061930000 | -5.7775180000 | 0.7400100000  |
| H  | -3.4861000000 | -6.0254710000 | 1.7576380000  |
| H  | -2.9718610000 | -6.0053480000 | 0.0702520000  |
| Sn | -1.5609320000 | 5.0733240000  | 0.3862480000  |
| C  | -1.7849170000 | 8.1536030000  | 5.1495680000  |
| H  | -1.6817890000 | 8.1850560000  | 6.2377180000  |
| H  | -2.8036160000 | 8.4715810000  | 4.9040150000  |
| C  | -1.4947340000 | 6.7639650000  | 4.6002350000  |
| H  | -1.0982620000 | 8.8962890000  | 4.7301590000  |
| H  | -0.4802830000 | 6.4569840000  | 4.8835610000  |
| C  | -1.6324390000 | 6.6768420000  | 3.0826090000  |
| H  | -2.1713140000 | 6.0333070000  | 5.0607440000  |
| H  | -0.9611290000 | 7.4172200000  | 2.6265520000  |
| H  | -2.6494960000 | 6.9847690000  | 2.8041630000  |
| C  | -1.3358700000 | 5.2821530000  | 2.5337060000  |
| H  | -0.3164330000 | 4.9757770000  | 2.7924090000  |
| H  | -2.0050690000 | 4.5415480000  | 2.9856770000  |

|   |               |              |               |
|---|---------------|--------------|---------------|
| C | 2.8757470000  | 8.4357760000 | -0.6899510000 |
| H | 3.7836560000  | 8.6100400000 | -1.2739520000 |
| H | 3.1613340000  | 8.4105640000 | 0.3668660000  |
| C | 2.1845470000  | 7.1442610000 | -1.1040930000 |
| H | 2.2189830000  | 9.3001890000 | -0.8332290000 |
| H | 1.9353770000  | 7.1818090000 | -2.1716960000 |
| C | 0.9125950000  | 6.8627270000 | -0.3085970000 |
| H | 2.8728810000  | 6.2986810000 | -0.9837280000 |
| H | 0.2289480000  | 7.7144640000 | -0.4275170000 |
| H | 1.1659410000  | 6.8281370000 | 0.7596090000  |
| C | 0.2258020000  | 5.5656730000 | -0.7318270000 |
| H | -0.0505310000 | 5.5881260000 | -1.7899480000 |
| H | 0.9011880000  | 4.7120650000 | -0.6035780000 |
| C | -4.7137450000 | 9.3603860000 | -1.5207680000 |
| H | -5.6721670000 | 9.7026200000 | -1.9207780000 |
| H | -3.9420250000 | 9.6006860000 | -2.2593130000 |
| C | -4.7368640000 | 7.8693040000 | -1.2155320000 |
| H | -4.5023640000 | 9.9464330000 | -0.6202930000 |
| H | -5.5367620000 | 7.6494820000 | -0.4973870000 |
| C | -3.4139340000 | 7.3502290000 | -0.6583090000 |
| H | -4.9828610000 | 7.3074050000 | -2.1249210000 |
| H | -3.1686990000 | 7.9166320000 | 0.2505580000  |
| H | -2.6165700000 | 7.5776570000 | -1.3784740000 |
| C | -3.4398140000 | 5.8508570000 | -0.3627030000 |
| H | -4.2210700000 | 5.6143020000 | 0.3676610000  |
| H | -3.6576560000 | 5.2808850000 | -1.2705570000 |

## 7. Crystallography Tables

**Table S8.** Crystallography data for molecules **6-8**.

| Identification code                         | <b>6</b>                                                        | <b>7</b>                                                        | <b>8</b>                                                         |
|---------------------------------------------|-----------------------------------------------------------------|-----------------------------------------------------------------|------------------------------------------------------------------|
| Empirical formula                           | $C_{32.5}H_{44.5}Ge_3N_{3.5}O_3P$                               | $C_{39}H_{60}Ge_3N_3O_3P$                                       | $C_{35}H_{53}Ge_3N_3O_{9.5}P_7S$                                 |
| Formula weight / g mol <sup>-1</sup>        | 966.77                                                          | 1053.46                                                         | 1198.54                                                          |
| Temperature / K                             | 100.00(10)                                                      | 100.0(3)                                                        | 100.0(3)                                                         |
| Crystal system                              | Monoclinic                                                      | Monoclinic                                                      | Triclinic                                                        |
| Space group                                 | P2 <sub>1</sub> /n                                              | P2 <sub>1</sub> /n                                              | P-1                                                              |
| a / Å                                       | 10.93920(10)                                                    | 14.6729(2)                                                      | 13.2603(3)                                                       |
| b / Å                                       | 20.9710(2)                                                      | 20.5725(3)                                                      | 13.7420(3)                                                       |
| c / Å                                       | 18.2317(2)                                                      | 15.8849(2)                                                      | 14.7414(3)                                                       |
| α / °                                       | 90                                                              | 90                                                              | 73.987(2)                                                        |
| β / °                                       | 89.9510(10)                                                     | 94.2470(10)                                                     | 87.041(2)                                                        |
| γ / °                                       | 90                                                              | 90                                                              | 89.564(2)                                                        |
| Volume / Å <sup>3</sup>                     | 4182.46(7)                                                      | 4781.82(11)                                                     | 2578.49(10)                                                      |
| Z                                           | 4                                                               | 4                                                               | 2                                                                |
| ρ <sub>calc</sub> / g cm <sup>-3</sup>      | 1.535                                                           | 1.463                                                           | 1.544                                                            |
| μ / mm <sup>-1</sup>                        | 5.375                                                           | 4.743                                                           | 5.680                                                            |
| F(000)                                      | 1956.0                                                          | 2160.0                                                          | 2160.01218.0                                                     |
| Crystal size / mm <sup>3</sup>              | 0.186 x 0.155 x 0.06                                            | 0.18 x 0.1 x 0.03                                               | 0.26 x 0.12 x 0.03                                               |
| Radiation                                   | Cu K <sub>α</sub> (λ = 1.54184)                                 | Cu K <sub>α</sub> (λ = 1.54184)                                 | Cu K <sub>α</sub> (λ = 1.54184)                                  |
| 2θ range for data collection / °            | 6.424 to 151.768                                                | 7.042 to 152.48                                                 | 6.246 to 152.818                                                 |
| Index ranges                                | -13 ≤ h ≤ 13, -25 ≤ k ≤ 26, -15 ≤ l ≤ 22                        | -18 ≤ h ≤ 18, -22 ≤ k ≤ 25, -19 ≤ l ≤ 17                        | -15 ≤ h ≤ 16, -17 ≤ k ≤ 17, -17 ≤ l ≤ 18                         |
| Reflections collected                       | 19585                                                           | 29680                                                           | 32445                                                            |
| Independent reflections                     | 7766 [ R <sub>int</sub> = 0.0176, R <sub>sigma</sub> = 0.0200 ] | 9613 [ R <sub>int</sub> = 0.0233, R <sub>sigma</sub> = 0.0219 ] | 10226 [ R <sub>int</sub> = 0.0208, R <sub>sigma</sub> = 0.0202 ] |
| Data/restraints/parameters                  | 7766/0/451                                                      | 9613/159/580                                                    | 10226/163/617                                                    |
| Goodness-of-fit on F <sup>2</sup>           | 1.058                                                           | 1.181                                                           | 1.047                                                            |
| Final R indices [I >= 2σ(I)]                | R <sub>1</sub> = 0.0311, wR <sub>2</sub> = 0.0819               | R <sub>1</sub> = 0.0475, wR <sub>2</sub> = 0.1086               | R <sub>1</sub> = 0.0300, wR <sub>2</sub> = 0.0765                |
| Final R indices [all data]                  | R <sub>1</sub> = 0.0328, wR <sub>2</sub> = 0.0829               | R <sub>1</sub> = 0.0489, wR <sub>2</sub> = 0.1094               | R <sub>1</sub> = 0.0314, wR <sub>2</sub> = 0.0774                |
| Largest diff. peak/hole / e Å <sup>-3</sup> | 1.22/-0.80                                                      | 0.79/-0.64                                                      | 1.13/-0.65                                                       |
| CCDC                                        | 2202019                                                         | 2202020                                                         | 2202022                                                          |

**Table S9.** Crystallography data for **11** and **5**.

|                                            | <b>11</b>                                                                                                    | <b>5</b>                                                         |
|--------------------------------------------|--------------------------------------------------------------------------------------------------------------|------------------------------------------------------------------|
| Identification code                        |                                                                                                              |                                                                  |
| Empirical formula                          | C <sub>33</sub> H <sub>51</sub> As <sub>7</sub> N <sub>3</sub> O <sub>9</sub> S <sub>3</sub> Si <sub>3</sub> | C <sub>30</sub> H <sub>75</sub> As <sub>11</sub> Ge <sub>5</sub> |
| Formula weight / g mol <sup>-1</sup>       | 1338.66                                                                                                      | 1622.97                                                          |
| Temperature / K                            | 99.99(10)                                                                                                    | 100.00(10)                                                       |
| Crystal system                             | Triclinic                                                                                                    | Triclinic                                                        |
| Space group                                | P-1                                                                                                          | P-1                                                              |
| a/ Å                                       | 13.8023(3)                                                                                                   | 7.6695(3)                                                        |
| b/ Å                                       | 13.5652(3)                                                                                                   | 14.0092(6)                                                       |
| c/ Å                                       | 14.0438(3)                                                                                                   | 24.6674(7)                                                       |
| α/°                                        | 94.859(2)                                                                                                    | 85.802(3)                                                        |
| β/°                                        | 93.493(2)                                                                                                    | 84.724(3)                                                        |
| γ/°                                        | 91.697(2)                                                                                                    | 84.724(3)                                                        |
| Volume / Å <sup>3</sup>                    | 2477.18(11)                                                                                                  | 2608.60(17)                                                      |
| Z                                          | 2                                                                                                            | 2                                                                |
| ρ <sub>calc</sub> g cm <sup>-3</sup>       | 1.795                                                                                                        | 2.066                                                            |
| μ/mm <sup>-1</sup>                         | 7.678                                                                                                        | 11.185                                                           |
| F(000)                                     | 1326.0                                                                                                       | 1156.0                                                           |
| Crystal size / mm <sup>3</sup>             | 0.092 x 0.053 x 0.024                                                                                        | 0.12 x 0.1 x 0.08                                                |
| Radiation                                  | Cu K <sub>α</sub> (λ = 1.54184)                                                                              | Cu K <sub>α</sub> (λ = 1.54184)                                  |
| 2θ range for data collection / °           | 6.33 to 151.664                                                                                              | 3.604 to 152.726                                                 |
| Index ranges                               | -16 ≤ h ≤ 16, -17 ≤ k ≤ 16, -17 ≤ l ≤ 11                                                                     | -9 ≤ h ≤ 8, -17 ≤ k ≤ 16, -27 ≤ l ≤ 30                           |
| Reflections collected                      | 32941                                                                                                        | 27987                                                            |
| Independent reflections                    | 9935 [R <sub>int</sub> = 0.0209, R <sub>sigma</sub> = 0.0196]                                                | 10433 [R <sub>int</sub> = 0.0572, R <sub>sigma</sub> = 0.0695]   |
| Data/restraints/parameters                 | 9935/0/535                                                                                                   | 10433/203/504                                                    |
| Goodness-of-fit on F <sup>2</sup>          | 1.044                                                                                                        | 1.042                                                            |
| Final R indices [I ≥ 2σ(I)]                | R <sub>1</sub> = 0.0224, wR <sub>2</sub> = 0.0598                                                            | R <sub>1</sub> = 0.0564, wR <sub>2</sub> = 0.1504                |
| Final R indices [all data]                 | R <sub>1</sub> = 0.0237, wR <sub>2</sub> = 0.0606                                                            | R <sub>1</sub> = 0.0809, wR <sub>2</sub> = 0.1672                |
| Largest diff. peak/hole/ e Å <sup>-3</sup> | 0.74/-0.84                                                                                                   | 1.57/-1.06                                                       |
| CCDC                                       | 2202021                                                                                                      | 2202018                                                          |

## 8. References

- G. Fritz, K. D. Hoppe, W. Hönle, D. Weber, C. Mujica, V. Manriquez and H. G. v. Schnering, *J. Organomet. Chem.*, 1983, **249**, 63–80.
- C. Mujica, D. Weber and H.-G. v. Schnering, *Z. Naturforsch.*, 1986, **41b**, 991–999.
- M. Cicač-Hudi, J. Bender, S. H. Schindwein, M. Bispinghoff, M. Nieger, H. Grützmacher and D. Gudat, *Eur. J. Inorg. Chem.*, 2016, **2016**, 649–658.
- G. M. Sheldrick, *Acta. Cryst.*, 2015, **A71**, 3–8.
- O. V. Dolomanov, L. J. Bourhis, R. J. Gildea, J. A. K. Howard and H. Puschmann, *J. Appl. Cryst.*, 2009, **42**, 339–341.
- W. Kohn and L. J. Sham, *Phys. Rev.*, 1965, **140**, A1133–A1138.
- P. Hohenberg and W. Kohn, *Phys. Rev.*, 1964, **136**, B864–B871.
- C. Peng, P. Y. Ayala, H. B. Schlegel and M. J. Frisch, *J. Comp. Chem.*, 1996, **17**, 49–56.
- F. Emmerling and C. Röhr, *Z. Anorg. Allg. Chem.*, 2003, **629**, 467–472.

10. S. Mandal, A. C. Reber, M. Qian, R. Liu, H. M. Saavedra, S. Sen, P. S. Weiss, S. N. Khanna and A. Sen, *Dalton Trans.*, 2012, **41**, 5454–5457.
11. P. Noblet, A. Dransfeld, R. Fischer, M. Flock and K. Hassler, *J. Organomet. Chem.*, 2011, **696**, 652–660.
12. B. van IJzendoorn, I. Vitorica-Yrezabal, G. Whitehead and M. Mehta, *Chem. Eur. J.*, 2021, **28**, e202103737.
13. K. Christe, D. Dixon, D. McLemore, W. Wilson, J. Sheehy and J. Boatz, *J. Fluor. Chem.*, 2000, **101**, 151–153.
14. P. Erdmann, J. Leitner, J. Schwarz and L. Greb, *ChemPhysChem*, 2020, **21**, 987–994.
15. H. Böhler, N. Trapp, D. Himmel, M. Schleep, I. Krossing, *Dalton Trans.*, 2015, **44**, 7489
